# Supplementary material for: Comparative Analysis of Immune Repertoires between Bactrian Camel's Conventional and Heavy-Chain Antibodies
Source: PubMed Central journal article supplement (PMC5010241; doi:10.1371/journal.pone.0161801), 2016-09-02
Supplement: pone.0161801.s003.pdf [file pone.0161801.s003.pdf]

**Table S3: 1-VH**

| The positions of amino acids | Amino acids | Counts | Percentage(%) |
|------------------------------|-------------|--------|---------------|
| 1                            | H           | 34782  | 66.05139      |
| 1                            | D           | 11092  | 21.06383      |
| 1                            | Q           | 4289   | 8.14486       |
| 1                            | S           | 882    | 1.67493       |
| 1                            | E           | 784    | 1.48882       |
| 1                            | M           | 269    | 0.51083       |
| 1                            | L           | 162    | 0.30764       |
| 1                            | P           | 95     | 0.18041       |
| 1                            | A           | 80     | 0.15192       |
| 1                            | Y           | 76     | 0.14432       |
| 1                            | R           | 41     | 0.07786       |
| 1                            | N           | 32     | 0.06077       |
| 1                            | G           | 24     | 0.04558       |
| 1                            | W           | 18     | 0.03418       |
| 1                            | C           | 12     | 0.02279       |
| 1                            | V           | 10     | 0.01899       |
| 1                            | I           | 5      | 0.0095        |
| 1                            | K           | 4      | 0.0076        |
| 1                            | F           | 1      | 0.0019        |
| 1                            | T           | 1      | 0.0019        |
| 2                            | V           | 51345  | 97.20198      |
| 2                            | C           | 837    | 1.58454       |
| 2                            | M           | 168    | 0.31804       |
| 2                            | G           | 124    | 0.23475       |
| 2                            | L           | 100    | 0.18931       |
| 2                            | W           | 89     | 0.16849       |
| 2                            | A           | 65     | 0.12305       |
| 2                            | H           | 25     | 0.04733       |
| 2                            | E           | 19     | 0.03597       |
| 2                            | R           | 15     | 0.0284        |
| 2                            | S           | 15     | 0.0284        |
| 2                            | D           | 9      | 0.01704       |
| 2                            | Q           | 6      | 0.01136       |
| 2                            | F           | 4      | 0.00757       |
| 2                            | I           | 1      | 0.00189       |
| 2                            | P           | 1      | 0.00189       |
| 3                            | Q           | 56664  | 97.66287      |
| 3                            | A           | 780    | 1.34436       |
| 3                            | S           | 167    | 0.28783       |
| 3                            | C           | 103    | 0.17752       |
| 3                            | P           | 100    | 0.17235       |
| 3                            | V           | 52     | 0.08962       |
| 3                            | R           | 33     | 0.05688       |

|   |   |       |          |
|---|---|-------|----------|
| 3 | K | 29    | 0.04998  |
| 3 | E | 28    | 0.04826  |
| 3 | L | 27    | 0.04654  |
| 3 | H | 18    | 0.03102  |
| 3 | W | 9     | 0.01551  |
| 3 | G | 5     | 0.00862  |
| 3 | M | 5     | 0.00862  |
| 4 | L | 57368 | 97.93438 |
| 4 | A | 692   | 1.18133  |
| 4 | W | 157   | 0.26802  |
| 4 | S | 88    | 0.15023  |
| 4 | P | 73    | 0.12462  |
| 4 | Q | 66    | 0.11267  |
| 4 | V | 55    | 0.09389  |
| 4 | M | 52    | 0.08877  |
| 4 | R | 11    | 0.01878  |
| 4 | G | 5     | 0.00854  |
| 4 | C | 3     | 0.00512  |
| 4 | H | 3     | 0.00512  |
| 4 | E | 2     | 0.00341  |
| 4 | D | 1     | 0.00171  |
| 4 | F | 1     | 0.00171  |
| 4 | T | 1     | 0.00171  |
| 5 | V | 58441 | 98.33586 |
| 5 | G | 631   | 1.06175  |
| 5 | W | 207   | 0.34831  |
| 5 | L | 50    | 0.08413  |
| 5 | A | 32    | 0.05384  |
| 5 | E | 26    | 0.04375  |
| 5 | M | 21    | 0.03534  |
| 5 | F | 7     | 0.01178  |
| 5 | C | 5     | 0.00841  |
| 5 | R | 4     | 0.00673  |
| 5 | S | 4     | 0.00673  |
| 5 | P | 1     | 0.00168  |
| 5 | T | 1     | 0.00168  |
| 6 | E | 58681 | 98.42668 |
| 6 | G | 578   | 0.96949  |
| 6 | S | 127   | 0.21302  |
| 6 | W | 56    | 0.09393  |
| 6 | A | 49    | 0.08219  |
| 6 | V | 44    | 0.0738   |
| 6 | M | 39    | 0.06542  |
| 6 | K | 16    | 0.02684  |
| 6 | Q | 11    | 0.01845  |
| 6 | D | 6     | 0.01006  |

|   |   |       |          |
|---|---|-------|----------|
| 6 | R | 4     | 0.00671  |
| 6 | Y | 4     | 0.00671  |
| 6 | C | 2     | 0.00335  |
| 6 | L | 2     | 0.00335  |
| 7 | S | 58862 | 98.55504 |
| 7 | V | 511   | 0.85559  |
| 7 | L | 122   | 0.20427  |
| 7 | F | 67    | 0.11218  |
| 7 | A | 57    | 0.09544  |
| 7 | Y | 38    | 0.06362  |
| 7 | P | 27    | 0.04521  |
| 7 | T | 14    | 0.02344  |
| 7 | E | 12    | 0.02009  |
| 7 | G | 6     | 0.01005  |
| 7 | W | 4     | 0.0067   |
| 7 | C | 3     | 0.00502  |
| 7 | D | 1     | 0.00167  |
| 7 | R | 1     | 0.00167  |
| 8 | G | 59100 | 98.82778 |
| 8 | W | 518   | 0.86621  |
| 8 | L | 52    | 0.08696  |
| 8 | E | 30    | 0.05017  |
| 8 | H | 29    | 0.04849  |
| 8 | R | 25    | 0.04181  |
| 8 | V | 13    | 0.02174  |
| 8 | D | 11    | 0.01839  |
| 8 | S | 10    | 0.01672  |
| 8 | A | 4     | 0.00669  |
| 8 | Q | 4     | 0.00669  |
| 8 | P | 3     | 0.00502  |
| 8 | F | 1     | 0.00167  |
| 8 | M | 1     | 0.00167  |
| 9 | G | 59516 | 99.34069 |
| 9 | E | 131   | 0.21866  |
| 9 | R | 126   | 0.21031  |
| 9 | V | 86    | 0.14355  |
| 9 | A | 21    | 0.03505  |
| 9 | M | 10    | 0.01669  |
| 9 | D | 5     | 0.00835  |
| 9 | K | 5     | 0.00835  |
| 9 | P | 3     | 0.00501  |
| 9 | S | 3     | 0.00501  |
| 9 | F | 2     | 0.00334  |
| 9 | C | 1     | 0.00167  |
| 9 | W | 1     | 0.00167  |
| 9 | Y | 1     | 0.00167  |

|    |    |       |          |
|----|----|-------|----------|
| 10 | NA | 0     | 0        |
| 11 | G  | 54591 | 90.98955 |
| 11 | D  | 2707  | 4.51189  |
| 11 | A  | 1031  | 1.71842  |
| 11 | E  | 353   | 0.58836  |
| 11 | R  | 346   | 0.5767   |
| 11 | N  | 314   | 0.52336  |
| 11 | S  | 239   | 0.39835  |
| 11 | V  | 165   | 0.27501  |
| 11 | T  | 78    | 0.13001  |
| 11 | Q  | 62    | 0.10334  |
| 11 | C  | 29    | 0.04834  |
| 11 | H  | 21    | 0.035    |
| 11 | K  | 21    | 0.035    |
| 11 | F  | 15    | 0.025    |
| 11 | Y  | 8     | 0.01333  |
| 11 | L  | 6     | 0.01     |
| 11 | W  | 5     | 0.00833  |
| 11 | I  | 4     | 0.00667  |
| 11 | M  | 2     | 0.00333  |
| 12 | L  | 51095 | 85.11152 |
| 12 | S  | 7230  | 12.04338 |
| 12 | V  | 393   | 0.65464  |
| 12 | F  | 214   | 0.35647  |
| 12 | A  | 209   | 0.34814  |
| 12 | T  | 180   | 0.29984  |
| 12 | M  | 169   | 0.28151  |
| 12 | W  | 156   | 0.25986  |
| 12 | P  | 108   | 0.1799   |
| 12 | E  | 83    | 0.13826  |
| 12 | R  | 55    | 0.09162  |
| 12 | Y  | 53    | 0.08828  |
| 12 | Q  | 24    | 0.03998  |
| 12 | K  | 17    | 0.02832  |
| 12 | H  | 15    | 0.02499  |
| 12 | G  | 13    | 0.02165  |
| 12 | I  | 9     | 0.01499  |
| 12 | D  | 5     | 0.00833  |
| 12 | N  | 4     | 0.00666  |
| 12 | C  | 1     | 0.00167  |
| 13 | V  | 58169 | 96.81763 |
| 13 | A  | 996   | 1.65776  |
| 13 | G  | 311   | 0.51763  |
| 13 | M  | 169   | 0.28129  |
| 13 | E  | 127   | 0.21138  |
| 13 | I  | 113   | 0.18808  |

|    |   |       |          |
|----|---|-------|----------|
| 13 | L | 77    | 0.12816  |
| 13 | C | 45    | 0.0749   |
| 13 | W | 26    | 0.04327  |
| 13 | T | 12    | 0.01997  |
| 13 | F | 11    | 0.01831  |
| 13 | R | 9     | 0.01498  |
| 13 | Q | 5     | 0.00832  |
| 13 | P | 4     | 0.00666  |
| 13 | S | 4     | 0.00666  |
| 13 | D | 2     | 0.00333  |
| 13 | K | 1     | 0.00166  |
| 14 | Q | 57269 | 95.28159 |
| 14 | R | 876   | 1.45745  |
| 14 | E | 596   | 0.9916   |
| 14 | H | 321   | 0.53407  |
| 14 | A | 239   | 0.39764  |
| 14 | L | 234   | 0.38932  |
| 14 | P | 178   | 0.29615  |
| 14 | K | 165   | 0.27452  |
| 14 | S | 65    | 0.10814  |
| 14 | T | 54    | 0.08984  |
| 14 | C | 31    | 0.05158  |
| 14 | N | 19    | 0.03161  |
| 14 | G | 16    | 0.02662  |
| 14 | D | 15    | 0.02496  |
| 14 | M | 12    | 0.01997  |
| 14 | V | 9     | 0.01497  |
| 14 | F | 2     | 0.00333  |
| 14 | W | 2     | 0.00333  |
| 14 | Y | 2     | 0.00333  |
| 15 | P | 52835 | 87.88111 |
| 15 | A | 5040  | 8.38309  |
| 15 | T | 730   | 1.21422  |
| 15 | S | 651   | 1.08282  |
| 15 | V | 348   | 0.57883  |
| 15 | L | 192   | 0.31936  |
| 15 | I | 84    | 0.13972  |
| 15 | F | 49    | 0.0815   |
| 15 | D | 39    | 0.06487  |
| 15 | H | 35    | 0.05822  |
| 15 | R | 34    | 0.05655  |
| 15 | N | 30    | 0.0499   |
| 15 | G | 22    | 0.03659  |
| 15 | E | 14    | 0.02329  |
| 15 | Y | 10    | 0.01663  |
| 15 | Q | 7     | 0.01164  |

|    |   |       |          |
|----|---|-------|----------|
| 15 | M | 1     | 0.00166  |
| 16 | G | 59451 | 98.81983 |
| 16 | W | 232   | 0.38563  |
| 16 | E | 165   | 0.27426  |
| 16 | R | 149   | 0.24767  |
| 16 | A | 75    | 0.12467  |
| 16 | V | 36    | 0.05984  |
| 16 | L | 29    | 0.0482   |
| 16 | S | 7     | 0.01164  |
| 16 | D | 5     | 0.00831  |
| 16 | T | 5     | 0.00831  |
| 16 | P | 3     | 0.00499  |
| 16 | C | 1     | 0.00166  |
| 16 | N | 1     | 0.00166  |
| 16 | Q | 1     | 0.00166  |
| 16 | Y | 1     | 0.00166  |
| 17 | G | 57771 | 95.9986  |
| 17 | E | 1240  | 2.06052  |
| 17 | R | 480   | 0.79762  |
| 17 | D | 151   | 0.25092  |
| 17 | V | 108   | 0.17946  |
| 17 | A | 102   | 0.16949  |
| 17 | K | 73    | 0.1213   |
| 17 | T | 49    | 0.08142  |
| 17 | W | 47    | 0.0781   |
| 17 | Q | 44    | 0.07312  |
| 17 | S | 42    | 0.06979  |
| 17 | N | 34    | 0.0565   |
| 17 | L | 21    | 0.0349   |
| 17 | M | 6     | 0.00997  |
| 17 | Y | 6     | 0.00997  |
| 17 | F | 2     | 0.00332  |
| 17 | P | 2     | 0.00332  |
| 17 | C | 1     | 0.00166  |
| 18 | S | 59097 | 98.08142 |
| 18 | T | 393   | 0.65225  |
| 18 | P | 286   | 0.47467  |
| 18 | F | 153   | 0.25393  |
| 18 | A | 146   | 0.24231  |
| 18 | G | 36    | 0.05975  |
| 18 | Y | 29    | 0.04813  |
| 18 | L | 25    | 0.04149  |
| 18 | V | 24    | 0.03983  |
| 18 | C | 14    | 0.02324  |
| 18 | I | 13    | 0.02158  |
| 18 | E | 9     | 0.01494  |

|    |   |       |          |
|----|---|-------|----------|
| 18 | R | 8     | 0.01328  |
| 18 | M | 6     | 0.00996  |
| 18 | N | 6     | 0.00996  |
| 18 | D | 5     | 0.0083   |
| 18 | H | 1     | 0.00166  |
| 18 | Q | 1     | 0.00166  |
| 18 | W | 1     | 0.00166  |
| 19 | L | 59024 | 97.85957 |
| 19 | V | 331   | 0.54879  |
| 19 | P | 292   | 0.48413  |
| 19 | R | 212   | 0.35149  |
| 19 | M | 161   | 0.26693  |
| 19 | Q | 150   | 0.24869  |
| 19 | A | 49    | 0.08124  |
| 19 | T | 26    | 0.04311  |
| 19 | I | 20    | 0.03316  |
| 19 | H | 16    | 0.02653  |
| 19 | S | 15    | 0.02487  |
| 19 | W | 8     | 0.01326  |
| 19 | G | 4     | 0.00663  |
| 19 | E | 3     | 0.00497  |
| 19 | F | 2     | 0.00332  |
| 19 | D | 1     | 0.00166  |
| 19 | Y | 1     | 0.00166  |
| 20 | R | 54434 | 90.22559 |
| 20 | T | 2868  | 4.75378  |
| 20 | K | 1228  | 2.03544  |
| 20 | S | 738   | 1.22325  |
| 20 | G | 366   | 0.60665  |
| 20 | N | 169   | 0.28012  |
| 20 | I | 158   | 0.26189  |
| 20 | M | 123   | 0.20388  |
| 20 | A | 65    | 0.10774  |
| 20 | L | 40    | 0.0663   |
| 20 | Q | 39    | 0.06464  |
| 20 | V | 36    | 0.05967  |
| 20 | E | 29    | 0.04807  |
| 20 | H | 16    | 0.02652  |
| 20 | D | 8     | 0.01326  |
| 20 | W | 7     | 0.0116   |
| 20 | C | 3     | 0.00497  |
| 20 | P | 3     | 0.00497  |
| 20 | F | 1     | 0.00166  |
| 21 | L | 58428 | 96.72069 |
| 21 | V | 895   | 1.48157  |
| 21 | I | 543   | 0.89887  |

|    |   |       |          |
|----|---|-------|----------|
| 21 | P | 284   | 0.47013  |
| 21 | F | 101   | 0.16719  |
| 21 | H | 98    | 0.16223  |
| 21 | R | 26    | 0.04304  |
| 21 | G | 13    | 0.02152  |
| 21 | S | 7     | 0.01159  |
| 21 | T | 6     | 0.00993  |
| 21 | A | 3     | 0.00497  |
| 21 | Q | 2     | 0.00331  |
| 21 | C | 1     | 0.00166  |
| 21 | E | 1     | 0.00166  |
| 21 | W | 1     | 0.00166  |
| 22 | S | 58888 | 97.38866 |
| 22 | A | 541   | 0.8947   |
| 22 | T | 461   | 0.7624   |
| 22 | P | 265   | 0.43826  |
| 22 | F | 101   | 0.16703  |
| 22 | V | 44    | 0.07277  |
| 22 | H | 37    | 0.06119  |
| 22 | D | 25    | 0.04134  |
| 22 | L | 25    | 0.04134  |
| 22 | Y | 25    | 0.04134  |
| 22 | I | 16    | 0.02646  |
| 22 | N | 13    | 0.0215   |
| 22 | G | 8     | 0.01323  |
| 22 | Q | 8     | 0.01323  |
| 22 | E | 4     | 0.00662  |
| 22 | C | 3     | 0.00496  |
| 22 | R | 2     | 0.00331  |
| 22 | M | 1     | 0.00165  |
| 23 | C | 60012 | 99.11148 |
| 23 | R | 246   | 0.40628  |
| 23 | Y | 101   | 0.1668   |
| 23 | S | 97    | 0.1602   |
| 23 | G | 32    | 0.05285  |
| 23 | W | 30    | 0.04955  |
| 23 | F | 13    | 0.02147  |
| 23 | L | 9     | 0.01486  |
| 23 | A | 3     | 0.00495  |
| 23 | P | 3     | 0.00495  |
| 23 | V | 2     | 0.0033   |
| 23 | D | 1     | 0.00165  |
| 23 | T | 1     | 0.00165  |
| 24 | A | 47240 | 77.99112 |
| 24 | V | 5681  | 9.37908  |
| 24 | T | 3152  | 5.20381  |



|    |   |       |          |
|----|---|-------|----------|
| 24 | S | 1619  | 2.6729   |
| 24 | E | 1102  | 1.81935  |
| 24 | L | 382   | 0.63066  |
| 24 | G | 373   | 0.61581  |
| 24 | K | 232   | 0.38302  |
| 24 | Q | 218   | 0.35991  |
| 24 | I | 217   | 0.35826  |
| 24 | R | 174   | 0.28727  |
| 24 | D | 95    | 0.15684  |
| 24 | P | 40    | 0.06604  |
| 24 | N | 19    | 0.03137  |
| 24 | M | 11    | 0.01816  |
| 24 | F | 8     | 0.01321  |
| 24 | H | 8     | 0.01321  |
| 25 | A | 52344 | 86.33207 |
| 25 | T | 2822  | 4.65438  |
| 25 | V | 2293  | 3.78189  |
| 25 | G | 1520  | 2.50697  |
| 25 | S | 446   | 0.7356   |
| 25 | P | 312   | 0.51459  |
| 25 | D | 185   | 0.30512  |
| 25 | I | 152   | 0.2507   |
| 25 | F | 105   | 0.17318  |
| 25 | Y | 96    | 0.15833  |
| 25 | C | 84    | 0.13854  |
| 25 | H | 64    | 0.10556  |
| 25 | L | 57    | 0.09401  |
| 25 | R | 48    | 0.07917  |
| 25 | E | 32    | 0.05278  |
| 25 | M | 31    | 0.05113  |
| 25 | N | 28    | 0.04618  |
| 25 | K | 5     | 0.00825  |
| 25 | W | 4     | 0.0066   |
| 25 | Q | 3     | 0.00495  |
| 26 | S | 58311 | 96.08958 |
| 26 | G | 578   | 0.95248  |
| 26 | P | 480   | 0.79098  |
| 26 | T | 391   | 0.64432  |
| 26 | A | 316   | 0.52073  |
| 26 | N | 174   | 0.28673  |
| 26 | F | 173   | 0.28508  |
| 26 | D | 68    | 0.11206  |
| 26 | Y | 68    | 0.11206  |
| 26 | L | 32    | 0.05273  |
| 26 | R | 28    | 0.04614  |
| 26 | H | 17    | 0.02801  |

|    |   |       |          |
|----|---|-------|----------|
| 26 | I | 15    | 0.02472  |
| 26 | C | 10    | 0.01648  |
| 26 | E | 7     | 0.01154  |
| 26 | V | 6     | 0.00989  |
| 26 | Q | 5     | 0.00824  |
| 26 | W | 3     | 0.00494  |
| 26 | K | 1     | 0.00165  |
| 26 | M | 1     | 0.00165  |
| 27 | G | 57771 | 95.16052 |
| 27 | E | 1052  | 1.73286  |
| 27 | A | 502   | 0.8269   |
| 27 | R | 491   | 0.80878  |
| 27 | V | 191   | 0.31462  |
| 27 | D | 153   | 0.25202  |
| 27 | K | 102   | 0.16801  |
| 27 | S | 83    | 0.13672  |
| 27 | Q | 80    | 0.13178  |
| 27 | T | 75    | 0.12354  |
| 27 | L | 55    | 0.0906   |
| 27 | I | 53    | 0.0873   |
| 27 | N | 43    | 0.07083  |
| 27 | M | 29    | 0.04777  |
| 27 | P | 15    | 0.02471  |
| 27 | F | 7     | 0.01153  |
| 27 | W | 3     | 0.00494  |
| 27 | H | 2     | 0.00329  |
| 27 | C | 1     | 0.00165  |
| 27 | Y | 1     | 0.00165  |
| 28 | F | 53780 | 88.53549 |
| 28 | L | 2031  | 3.34354  |
| 28 | Y | 1503  | 2.47432  |
| 28 | S | 1253  | 2.06276  |
| 28 | I | 597   | 0.98281  |
| 28 | V | 529   | 0.87087  |
| 28 | D | 232   | 0.38193  |
| 28 | N | 145   | 0.23871  |
| 28 | A | 121   | 0.1992   |
| 28 | H | 109   | 0.17944  |
| 28 | W | 103   | 0.16956  |
| 28 | G | 89    | 0.14652  |
| 28 | T | 57    | 0.09384  |
| 28 | R | 56    | 0.09219  |
| 28 | P | 43    | 0.07079  |
| 28 | C | 28    | 0.0461   |
| 28 | M | 28    | 0.0461   |
| 28 | K | 19    | 0.03128  |

|    |   |       |          |
|----|---|-------|----------|
| 28 | E | 17    | 0.02799  |
| 28 | Q | 4     | 0.00659  |
| 29 | T | 48518 | 79.83874 |
| 29 | A | 3035  | 4.99424  |
| 29 | S | 2406  | 3.95919  |
| 29 | I | 1831  | 3.013    |
| 29 | P | 1400  | 2.30377  |
| 29 | D | 671   | 1.10416  |
| 29 | R | 513   | 0.84417  |
| 29 | N | 368   | 0.60556  |
| 29 | L | 359   | 0.59075  |
| 29 | V | 345   | 0.56771  |
| 29 | G | 303   | 0.4986   |
| 29 | F | 207   | 0.34063  |
| 29 | M | 190   | 0.31265  |
| 29 | K | 178   | 0.29291  |
| 29 | H | 127   | 0.20898  |
| 29 | E | 119   | 0.19582  |
| 29 | Q | 115   | 0.18924  |
| 29 | Y | 70    | 0.11519  |
| 29 | W | 13    | 0.02139  |
| 29 | C | 2     | 0.00329  |
| 30 | F | 51997 | 85.52138 |
| 30 | L | 2384  | 3.92105  |
| 30 | S | 1664  | 2.73684  |
| 30 | Y | 1125  | 1.85033  |
| 30 | V | 1011  | 1.66283  |
| 30 | I | 889   | 1.46217  |
| 30 | A | 467   | 0.76809  |
| 30 | D | 232   | 0.38158  |
| 30 | T | 226   | 0.37171  |
| 30 | G | 203   | 0.33388  |
| 30 | R | 117   | 0.19243  |
| 30 | N | 100   | 0.16447  |
| 30 | W | 89    | 0.14638  |
| 30 | H | 72    | 0.11842  |
| 30 | C | 64    | 0.10526  |
| 30 | P | 56    | 0.09211  |
| 30 | M | 30    | 0.04934  |
| 30 | Q | 27    | 0.04441  |
| 30 | E | 24    | 0.03947  |
| 30 | K | 23    | 0.03783  |
| 31 | S | 47374 | 77.90239 |
| 31 | G | 2701  | 4.44156  |
| 31 | R | 2245  | 3.69171  |
| 31 | T | 2171  | 3.57002  |

|    |   |       |          |
|----|---|-------|----------|
| 31 | N | 2051  | 3.37269  |
| 31 | D | 1573  | 2.58666  |
| 31 | M | 609   | 1.00145  |
| 31 | A | 543   | 0.89292  |
| 31 | K | 399   | 0.65612  |
| 31 | E | 258   | 0.42426  |
| 31 | I | 234   | 0.38479  |
| 31 | V | 146   | 0.24008  |
| 31 | H | 115   | 0.18911  |
| 31 | C | 95    | 0.15622  |
| 31 | P | 87    | 0.14306  |
| 31 | Y | 63    | 0.1036   |
| 31 | L | 59    | 0.09702  |
| 31 | Q | 55    | 0.09044  |
| 31 | F | 18    | 0.0296   |
| 31 | W | 16    | 0.02631  |
| 32 | S | 26918 | 44.24392 |
| 32 | N | 9289  | 15.26792 |
| 32 | T | 7744  | 12.72847 |
| 32 | D | 3813  | 6.26726  |
| 32 | R | 3005  | 4.93918  |
| 32 | G | 2073  | 3.4073   |
| 32 | A | 1644  | 2.70217  |
| 32 | I | 1129  | 1.85569  |
| 32 | Y | 1059  | 1.74063  |
| 32 | K | 848   | 1.39382  |
| 32 | V | 636   | 1.04536  |
| 32 | L | 593   | 0.97469  |
| 32 | E | 441   | 0.72485  |
| 32 | M | 417   | 0.6854   |
| 32 | P | 398   | 0.65417  |
| 32 | H | 363   | 0.59665  |
| 32 | F | 209   | 0.34352  |
| 32 | Q | 162   | 0.26627  |
| 32 | W | 56    | 0.09204  |
| 32 | C | 43    | 0.07068  |
| 33 | Y | 42519 | 69.84411 |
| 33 | S | 2949  | 4.84419  |
| 33 | N | 2858  | 4.69471  |
| 33 | H | 2564  | 4.21177  |
| 33 | F | 1564  | 2.56911  |
| 33 | A | 1553  | 2.55105  |
| 33 | T | 1148  | 1.88577  |
| 33 | W | 1035  | 1.70015  |
| 33 | V | 936   | 1.53753  |
| 33 | D | 734   | 1.20571  |

|    |    |       |          |
|----|----|-------|----------|
| 33 | R  | 673   | 1.10551  |
| 33 | G  | 490   | 0.8049   |
| 33 | C  | 453   | 0.74412  |
| 33 | L  | 398   | 0.65378  |
| 33 | K  | 256   | 0.42052  |
| 33 | I  | 240   | 0.39424  |
| 33 | E  | 190   | 0.3121   |
| 33 | Q  | 151   | 0.24804  |
| 33 | P  | 96    | 0.1577   |
| 33 | M  | 70    | 0.11499  |
| 34 | Y  | 14650 | 24.04714 |
| 34 | A  | 11684 | 19.17862 |
| 34 | W  | 10611 | 17.41735 |
| 34 | D  | 7501  | 12.31247 |
| 34 | G  | 3871  | 6.35403  |
| 34 | S  | 2140  | 3.51269  |
| 34 | C  | 1668  | 2.73793  |
| 34 | H  | 1632  | 2.67884  |
| 34 | R  | 1301  | 2.13552  |
| 34 | V  | 1187  | 1.94839  |
| 34 | T  | 1139  | 1.8696   |
| 34 | F  | 882   | 1.44775  |
| 34 | P  | 859   | 1.41     |
| 34 | L  | 620   | 1.01769  |
| 34 | E  | 344   | 0.56466  |
| 34 | N  | 313   | 0.51377  |
| 34 | I  | 266   | 0.43662  |
| 34 | Q  | 113   | 0.18548  |
| 34 | M  | 74    | 0.12147  |
| 34 | K  | 67    | 0.10998  |
| 35 | NA | 0     | 0        |
| 36 | NA | 0     | 0        |
| 37 | NA | 0     | 0        |
| 38 | NA | 0     | 0        |
| 39 | M  | 53967 | 88.47484 |
| 39 | I  | 2597  | 4.25759  |
| 39 | L  | 1375  | 2.25421  |
| 39 | V  | 1159  | 1.90009  |
| 39 | T  | 1022  | 1.67549  |
| 39 | F  | 168   | 0.27542  |
| 39 | A  | 113   | 0.18526  |
| 39 | S  | 112   | 0.18362  |
| 39 | W  | 105   | 0.17214  |
| 39 | G  | 99    | 0.1623   |
| 39 | K  | 91    | 0.14919  |
| 39 | R  | 66    | 0.1082   |

|    |   |       |          |
|----|---|-------|----------|
| 39 | P | 62    | 0.10164  |
| 39 | Q | 22    | 0.03607  |
| 39 | Y | 14    | 0.02295  |
| 39 | E | 12    | 0.01967  |
| 39 | N | 9     | 0.01475  |
| 39 | C | 3     | 0.00492  |
| 39 | H | 1     | 0.00164  |
| 40 | S | 27031 | 44.21092 |
| 40 | Y | 8564  | 14.00697 |
| 40 | T | 6190  | 10.12414 |
| 40 | N | 5139  | 8.40516  |
| 40 | G | 4065  | 6.64857  |
| 40 | H | 3324  | 5.43661  |
| 40 | A | 2236  | 3.65712  |
| 40 | I | 1154  | 1.88744  |
| 40 | F | 944   | 1.54397  |
| 40 | R | 698   | 1.14162  |
| 40 | M | 469   | 0.76708  |
| 40 | D | 455   | 0.74418  |
| 40 | C | 287   | 0.46941  |
| 40 | V | 213   | 0.34838  |
| 40 | K | 141   | 0.23061  |
| 40 | L | 109   | 0.17828  |
| 40 | W | 56    | 0.09159  |
| 40 | Q | 28    | 0.0458   |
| 40 | E | 25    | 0.04089  |
| 40 | P | 13    | 0.02126  |
| 41 | W | 60994 | 99.30803 |
| 41 | R | 278   | 0.45263  |
| 41 | C | 52    | 0.08466  |
| 41 | L | 45    | 0.07327  |
| 41 | Y | 13    | 0.02117  |
| 41 | S | 12    | 0.01954  |
| 41 | G | 11    | 0.01791  |
| 41 | F | 7     | 0.0114   |
| 41 | A | 2     | 0.00326  |
| 41 | H | 2     | 0.00326  |
| 41 | K | 1     | 0.00163  |
| 41 | P | 1     | 0.00163  |
| 41 | V | 1     | 0.00163  |
| 42 | V | 55810 | 90.34838 |
| 42 | I | 2345  | 3.79622  |
| 42 | F | 1857  | 3.00622  |
| 42 | A | 587   | 0.95027  |
| 42 | L | 375   | 0.60707  |
| 42 | G | 349   | 0.56498  |

|    |   |       |          |
|----|---|-------|----------|
| 42 | Y | 231   | 0.37396  |
| 42 | D | 74    | 0.1198   |
| 42 | S | 55    | 0.08904  |
| 42 | H | 20    | 0.03238  |
| 42 | N | 13    | 0.02105  |
| 42 | Q | 12    | 0.01943  |
| 42 | T | 10    | 0.01619  |
| 42 | P | 9     | 0.01457  |
| 42 | W | 9     | 0.01457  |
| 42 | K | 7     | 0.01133  |
| 42 | M | 5     | 0.00809  |
| 42 | C | 2     | 0.00324  |
| 42 | E | 1     | 0.00162  |
| 42 | R | 1     | 0.00162  |
| 43 | R | 61587 | 99.27303 |
| 43 | H | 216   | 0.34817  |
| 43 | C | 133   | 0.21438  |
| 43 | S | 34    | 0.05481  |
| 43 | L | 27    | 0.04352  |
| 43 | P | 15    | 0.02418  |
| 43 | G | 12    | 0.01934  |
| 43 | A | 5     | 0.00806  |
| 43 | Q | 3     | 0.00484  |
| 43 | F | 2     | 0.00322  |
| 43 | W | 2     | 0.00322  |
| 43 | T | 1     | 0.00161  |
| 43 | Y | 1     | 0.00161  |
| 44 | Q | 60638 | 97.5609  |
| 44 | R | 577   | 0.92834  |
| 44 | L | 428   | 0.68861  |
| 44 | H | 234   | 0.37648  |
| 44 | E | 82    | 0.13193  |
| 44 | K | 49    | 0.07884  |
| 44 | P | 28    | 0.04505  |
| 44 | S | 28    | 0.04505  |
| 44 | A | 27    | 0.04344  |
| 44 | M | 27    | 0.04344  |
| 44 | W | 12    | 0.01931  |
| 44 | Y | 9     | 0.01448  |
| 44 | V | 7     | 0.01126  |
| 44 | G | 5     | 0.00804  |
| 44 | D | 2     | 0.00322  |
| 44 | C | 1     | 0.00161  |
| 45 | A | 54187 | 87.0418  |
| 45 | T | 2145  | 3.44556  |
| 45 | G | 1786  | 2.86889  |

|    |   |       |          |
|----|---|-------|----------|
| 45 | V | 1564  | 2.51229  |
| 45 | P | 746   | 1.19832  |
| 45 | S | 543   | 0.87223  |
| 45 | I | 394   | 0.63289  |
| 45 | R | 321   | 0.51563  |
| 45 | L | 254   | 0.40801  |
| 45 | D | 140   | 0.22489  |
| 45 | N | 52    | 0.08353  |
| 45 | H | 32    | 0.0514   |
| 45 | F | 29    | 0.04658  |
| 45 | Y | 24    | 0.03855  |
| 45 | E | 20    | 0.03213  |
| 45 | C | 8     | 0.01285  |
| 45 | K | 5     | 0.00803  |
| 45 | M | 3     | 0.00482  |
| 45 | Q | 1     | 0.00161  |
| 46 | P | 60750 | 97.46667 |
| 46 | S | 560   | 0.89846  |
| 46 | A | 310   | 0.49736  |
| 46 | L | 184   | 0.29521  |
| 46 | Q | 177   | 0.28398  |
| 46 | T | 113   | 0.1813   |
| 46 | R | 101   | 0.16204  |
| 46 | H | 49    | 0.07862  |
| 46 | E | 22    | 0.0353   |
| 46 | V | 14    | 0.02246  |
| 46 | G | 13    | 0.02086  |
| 46 | I | 13    | 0.02086  |
| 46 | K | 8     | 0.01284  |
| 46 | W | 7     | 0.01123  |
| 46 | D | 5     | 0.00802  |
| 46 | C | 2     | 0.00321  |
| 46 | M | 1     | 0.0016   |
| 47 | G | 61239 | 98.13156 |
| 47 | E | 562   | 0.90057  |
| 47 | R | 162   | 0.25959  |
| 47 | A | 117   | 0.18748  |
| 47 | D | 92    | 0.14742  |
| 47 | W | 75    | 0.12018  |
| 47 | V | 68    | 0.10897  |
| 47 | K | 26    | 0.04166  |
| 47 | Q | 23    | 0.03686  |
| 47 | L | 16    | 0.02564  |
| 47 | S | 12    | 0.01923  |
| 47 | T | 7     | 0.01122  |
| 47 | H | 3     | 0.00481  |



|    |   |       |          |
|----|---|-------|----------|
| 47 | C | 1     | 0.0016   |
| 47 | M | 1     | 0.0016   |
| 47 | N | 1     | 0.0016   |
| 48 | K | 59939 | 95.96228 |
| 48 | R | 632   | 1.01183  |
| 48 | E | 530   | 0.84853  |
| 48 | Q | 350   | 0.56035  |
| 48 | T | 214   | 0.34261  |
| 48 | N | 201   | 0.3218   |
| 48 | M | 186   | 0.29779  |
| 48 | G | 118   | 0.18892  |
| 48 | A | 84    | 0.13448  |
| 48 | V | 74    | 0.11847  |
| 48 | S | 60    | 0.09606  |
| 48 | L | 42    | 0.06724  |
| 48 | I | 14    | 0.02241  |
| 48 | W | 5     | 0.008    |
| 48 | D | 4     | 0.0064   |
| 48 | P | 4     | 0.0064   |
| 48 | Y | 2     | 0.0032   |
| 48 | C | 1     | 0.0016   |
| 48 | F | 1     | 0.0016   |
| 49 | G | 59973 | 95.88623 |
| 49 | E | 1258  | 2.01132  |
| 49 | A | 397   | 0.63473  |
| 49 | R | 203   | 0.32456  |
| 49 | K | 171   | 0.2734   |
| 49 | T | 136   | 0.21744  |
| 49 | D | 129   | 0.20625  |
| 49 | V | 78    | 0.12471  |
| 49 | S | 57    | 0.09113  |
| 49 | Q | 40    | 0.06395  |
| 49 | W | 33    | 0.05276  |
| 49 | P | 28    | 0.04477  |
| 49 | N | 15    | 0.02398  |
| 49 | L | 14    | 0.02238  |
| 49 | C | 4     | 0.0064   |
| 49 | H | 4     | 0.0064   |
| 49 | F | 3     | 0.0048   |
| 49 | I | 2     | 0.0032   |
| 49 | Y | 1     | 0.0016   |
| 50 | L | 59444 | 94.89631 |
| 50 | P | 879   | 1.40323  |
| 50 | R | 828   | 1.32182  |
| 50 | F | 803   | 1.28191  |
| 50 | V | 234   | 0.37356  |

|    |   |       |          |
|----|---|-------|----------|
| 50 | I | 145   | 0.23148  |
| 50 | H | 138   | 0.2203   |
| 50 | Q | 45    | 0.07184  |
| 50 | M | 42    | 0.06705  |
| 50 | C | 39    | 0.06226  |
| 50 | S | 11    | 0.01756  |
| 50 | T | 9     | 0.01437  |
| 50 | A | 6     | 0.00958  |
| 50 | G | 5     | 0.00798  |
| 50 | Y | 4     | 0.00639  |
| 50 | N | 3     | 0.00479  |
| 50 | K | 2     | 0.00319  |
| 50 | W | 2     | 0.00319  |
| 50 | D | 1     | 0.0016   |
| 50 | E | 1     | 0.0016   |
| 51 | E | 61193 | 97.60739 |
| 51 | D | 555   | 0.88527  |
| 51 | Q | 251   | 0.40036  |
| 51 | G | 221   | 0.35251  |
| 51 | V | 162   | 0.2584   |
| 51 | K | 136   | 0.21693  |
| 51 | A | 91    | 0.14515  |
| 51 | N | 48    | 0.07656  |
| 51 | W | 8     | 0.01276  |
| 51 | R | 7     | 0.01117  |
| 51 | L | 6     | 0.00957  |
| 51 | M | 4     | 0.00638  |
| 51 | S | 4     | 0.00638  |
| 51 | F | 3     | 0.00479  |
| 51 | H | 2     | 0.00319  |
| 51 | C | 1     | 0.0016   |
| 51 | T | 1     | 0.0016   |
| 52 | W | 60340 | 96.14404 |
| 52 | G | 752   | 1.19822  |
| 52 | R | 646   | 1.02932  |
| 52 | C | 293   | 0.46686  |
| 52 | S | 155   | 0.24697  |
| 52 | Y | 151   | 0.2406   |
| 52 | L | 137   | 0.21829  |
| 52 | F | 79    | 0.12588  |
| 52 | A | 62    | 0.09879  |
| 52 | E | 33    | 0.05258  |
| 52 | Q | 24    | 0.03824  |
| 52 | P | 19    | 0.03027  |
| 52 | V | 19    | 0.03027  |
| 52 | M | 16    | 0.02549  |

|    |   |       |          |
|----|---|-------|----------|
| 52 | T | 14    | 0.02231  |
| 52 | H | 6     | 0.00956  |
| 52 | K | 5     | 0.00797  |
| 52 | D | 4     | 0.00637  |
| 52 | I | 4     | 0.00637  |
| 52 | N | 1     | 0.00159  |
| 53 | V | 59279 | 94.36326 |
| 53 | I | 1553  | 2.47214  |
| 53 | L | 1218  | 1.93887  |
| 53 | M | 262   | 0.41706  |
| 53 | A | 258   | 0.4107   |
| 53 | D | 62    | 0.09869  |
| 53 | Q | 49    | 0.078    |
| 53 | E | 40    | 0.06367  |
| 53 | G | 33    | 0.05253  |
| 53 | T | 25    | 0.0398   |
| 53 | F | 22    | 0.03502  |
| 53 | S | 6     | 0.00955  |
| 53 | C | 4     | 0.00637  |
| 53 | K | 3     | 0.00478  |
| 53 | P | 3     | 0.00478  |
| 53 | H | 2     | 0.00318  |
| 53 | W | 1     | 0.00159  |
| 54 | S | 56599 | 89.98967 |
| 54 | A | 4346  | 6.90993  |
| 54 | T | 531   | 0.84426  |
| 54 | G | 413   | 0.65665  |
| 54 | C | 407   | 0.64711  |
| 54 | P | 209   | 0.3323   |
| 54 | L | 99    | 0.15741  |
| 54 | F | 91    | 0.14469  |
| 54 | V | 82    | 0.13038  |
| 54 | N | 38    | 0.06042  |
| 54 | Y | 32    | 0.05088  |
| 54 | I | 15    | 0.02385  |
| 54 | W | 9     | 0.01431  |
| 54 | Q | 8     | 0.01272  |
| 54 | R | 5     | 0.00795  |
| 54 | M | 4     | 0.00636  |
| 54 | D | 3     | 0.00477  |
| 54 | E | 2     | 0.00318  |
| 54 | H | 2     | 0.00318  |
| 55 | S | 22509 | 35.75638 |
| 55 | T | 10970 | 17.42625 |
| 55 | A | 10426 | 16.56209 |
| 55 | G | 7981  | 12.67811 |

|    |   |       |          |
|----|---|-------|----------|
| 55 | R | 2645  | 4.20168  |
| 55 | V | 1694  | 2.69098  |
| 55 | I | 1259  | 1.99997  |
| 55 | D | 789   | 1.25336  |
| 55 | N | 757   | 1.20252  |
| 55 | Y | 757   | 1.20252  |
| 55 | L | 685   | 1.08815  |
| 55 | H | 592   | 0.94041  |
| 55 | F | 534   | 0.84828  |
| 55 | C | 351   | 0.55758  |
| 55 | E | 316   | 0.50198  |
| 55 | M | 203   | 0.32247  |
| 55 | Q | 202   | 0.32088  |
| 55 | K | 138   | 0.21922  |
| 55 | W | 113   | 0.1795   |
| 55 | P | 30    | 0.04766  |
| 56 | I | 53478 | 84.87224 |
| 56 | V | 3204  | 5.08491  |
| 56 | L | 2062  | 3.2725   |
| 56 | S | 1442  | 2.28853  |
| 56 | M | 933   | 1.48072  |
| 56 | T | 807   | 1.28075  |
| 56 | F | 435   | 0.69037  |
| 56 | A | 138   | 0.21901  |
| 56 | N | 118   | 0.18727  |
| 56 | C | 102   | 0.16188  |
| 56 | R | 68    | 0.10792  |
| 56 | G | 60    | 0.09522  |
| 56 | D | 39    | 0.06189  |
| 56 | K | 39    | 0.06189  |
| 56 | H | 37    | 0.05872  |
| 56 | E | 29    | 0.04602  |
| 56 | P | 6     | 0.00952  |
| 56 | Y | 6     | 0.00952  |
| 56 | Q | 5     | 0.00794  |
| 56 | W | 2     | 0.00317  |
| 57 | N | 20544 | 32.58263 |
| 57 | Y | 14212 | 22.54013 |
| 57 | S | 9069  | 14.38337 |
| 57 | D | 4353  | 6.90383  |
| 57 | T | 2611  | 4.14103  |
| 57 | K | 2046  | 3.24494  |
| 57 | H | 1530  | 2.42657  |
| 57 | R | 1430  | 2.26797  |
| 57 | G | 1398  | 2.21722  |
| 57 | A | 1190  | 1.88733  |

|    |   |       |          |
|----|---|-------|----------|
| 57 | V | 973   | 1.54317  |
| 57 | I | 764   | 1.2117   |
| 57 | F | 641   | 1.01662  |
| 57 | L | 594   | 0.94208  |
| 57 | E | 581   | 0.92146  |
| 57 | W | 479   | 0.75969  |
| 57 | P | 244   | 0.38698  |
| 57 | Q | 146   | 0.23155  |
| 57 | M | 124   | 0.19666  |
| 57 | C | 123   | 0.19508  |
| 58 | S | 32769 | 51.91869 |
| 58 | T | 7240  | 11.47094 |
| 58 | G | 4330  | 6.86038  |
| 58 | R | 3363  | 5.32828  |
| 58 | N | 3011  | 4.77058  |
| 58 | A | 2479  | 3.92769  |
| 58 | W | 2001  | 3.17035  |
| 58 | P | 1464  | 2.31954  |
| 58 | K | 1112  | 1.76184  |
| 58 | D | 1073  | 1.70004  |
| 58 | H | 772   | 1.22314  |
| 58 | I | 768   | 1.21681  |
| 58 | V | 687   | 1.08847  |
| 58 | E | 521   | 0.82546  |
| 58 | Y | 440   | 0.69713  |
| 58 | L | 413   | 0.65435  |
| 58 | F | 310   | 0.49116  |
| 58 | Q | 163   | 0.25825  |
| 58 | M | 147   | 0.2329   |
| 58 | C | 53    | 0.08397  |
| 59 | G | 27847 | 44.05753 |
| 59 | D | 22172 | 35.07895 |
| 59 | S | 3873  | 6.12758  |
| 59 | A | 2105  | 3.33038  |
| 59 | N | 1592  | 2.51875  |
| 59 | R | 1149  | 1.81787  |
| 59 | V | 889   | 1.40651  |
| 59 | T | 718   | 1.13597  |
| 59 | E | 712   | 1.12648  |
| 59 | L | 593   | 0.9382   |
| 59 | Y | 469   | 0.74202  |
| 59 | I | 371   | 0.58697  |
| 59 | H | 239   | 0.37813  |
| 59 | F | 144   | 0.22783  |
| 59 | P | 135   | 0.21359  |
| 59 | K | 108   | 0.17087  |

|    |   |       |          |
|----|---|-------|----------|
| 59 | W | 38    | 0.06012  |
| 59 | C | 18    | 0.02848  |
| 59 | Q | 18    | 0.02848  |
| 59 | M | 16    | 0.02531  |
| 60 | G | 51017 | 80.5943  |
| 60 | D | 3423  | 5.4075   |
| 60 | S | 3384  | 5.34589  |
| 60 | A | 2777  | 4.38698  |
| 60 | R | 562   | 0.88782  |
| 60 | V | 360   | 0.56871  |
| 60 | N | 325   | 0.51342  |
| 60 | E | 301   | 0.47551  |
| 60 | T | 295   | 0.46603  |
| 60 | I | 217   | 0.34281  |
| 60 | P | 173   | 0.2733   |
| 60 | Y | 149   | 0.23538  |
| 60 | H | 91    | 0.14376  |
| 60 | L | 75    | 0.11848  |
| 60 | F | 52    | 0.08215  |
| 60 | K | 35    | 0.05529  |
| 60 | C | 26    | 0.04107  |
| 60 | M | 22    | 0.03475  |
| 60 | Q | 10    | 0.0158   |
| 60 | W | 7     | 0.01106  |
| 61 | G | 23552 | 37.1594  |
| 61 | S | 15420 | 24.32906 |
| 61 | T | 6238  | 9.84207  |
| 61 | D | 5672  | 8.94905  |
| 61 | R | 3393  | 5.35334  |
| 61 | A | 1996  | 3.14921  |
| 61 | L | 1354  | 2.13629  |
| 61 | V | 1173  | 1.85071  |
| 61 | N | 903   | 1.42472  |
| 61 | E | 833   | 1.31427  |
| 61 | I | 705   | 1.11232  |
| 61 | K | 538   | 0.84883  |
| 61 | Y | 453   | 0.71473  |
| 61 | H | 244   | 0.38497  |
| 61 | P | 220   | 0.34711  |
| 61 | F | 199   | 0.31397  |
| 61 | M | 173   | 0.27295  |
| 61 | Q | 155   | 0.24455  |
| 61 | W | 136   | 0.21458  |
| 61 | C | 24    | 0.03787  |
| 62 | S | 17058 | 26.88882 |
| 62 | T | 14214 | 22.40578 |

|    |    |       |          |
|----|----|-------|----------|
| 62 | N  | 11351 | 17.89278 |
| 62 | R  | 3624  | 5.71257  |
| 62 | D  | 2824  | 4.45152  |
| 62 | I  | 2698  | 4.2529   |
| 62 | K  | 2169  | 3.41903  |
| 62 | A  | 1958  | 3.08643  |
| 62 | G  | 1673  | 2.63718  |
| 62 | V  | 1216  | 1.9168   |
| 62 | Y  | 1177  | 1.85533  |
| 62 | L  | 820   | 1.29258  |
| 62 | M  | 574   | 0.90481  |
| 62 | P  | 497   | 0.78343  |
| 62 | H  | 482   | 0.75978  |
| 62 | E  | 455   | 0.71722  |
| 62 | Q  | 362   | 0.57063  |
| 62 | F  | 213   | 0.33576  |
| 62 | W  | 49    | 0.07724  |
| 62 | C  | 25    | 0.03941  |
| 63 | T  | 47875 | 82.66853 |
| 63 | A  | 2491  | 4.30135  |
| 63 | I  | 1512  | 2.61086  |
| 63 | L  | 1424  | 2.4589   |
| 63 | S  | 1300  | 2.24479  |
| 63 | P  | 963   | 1.66287  |
| 63 | K  | 666   | 1.15002  |
| 63 | V  | 404   | 0.69761  |
| 63 | E  | 340   | 0.5871   |
| 63 | R  | 298   | 0.51457  |
| 63 | Q  | 239   | 0.4127   |
| 63 | G  | 161   | 0.27801  |
| 63 | M  | 99    | 0.17095  |
| 63 | D  | 48    | 0.08288  |
| 63 | Y  | 26    | 0.0449   |
| 63 | W  | 23    | 0.03972  |
| 63 | F  | 17    | 0.02935  |
| 63 | N  | 13    | 0.02245  |
| 63 | C  | 11    | 0.01899  |
| 63 | H  | 2     | 0.00345  |
| 63 | NA | 0     | 0        |
| 64 | NA | 0     | 0        |
| 65 | NA | 0     | 0        |
| 66 | Y  | 43004 | 67.57598 |
| 66 | N  | 2552  | 4.01018  |
| 66 | F  | 2357  | 3.70376  |
| 66 | V  | 2207  | 3.46805  |
| 66 | S  | 2061  | 3.23863  |

|    |   |       |          |
|----|---|-------|----------|
| 66 | H | 1828  | 2.8725   |
| 66 | D | 1789  | 2.81121  |
| 66 | A | 1368  | 2.14966  |
| 66 | L | 1254  | 1.97052  |
| 66 | W | 1011  | 1.58867  |
| 66 | T | 956   | 1.50225  |
| 66 | R | 816   | 1.28225  |
| 66 | G | 709   | 1.11411  |
| 66 | I | 649   | 1.01983  |
| 66 | K | 449   | 0.70555  |
| 66 | E | 223   | 0.35042  |
| 66 | Q | 162   | 0.25456  |
| 66 | C | 149   | 0.23414  |
| 66 | P | 49    | 0.077    |
| 66 | M | 45    | 0.07071  |
| 67 | Y | 59575 | 93.2039  |
| 67 | S | 1645  | 2.57357  |
| 67 | F | 471   | 0.73687  |
| 67 | H | 410   | 0.64144  |
| 67 | T | 342   | 0.53505  |
| 67 | V | 275   | 0.43023  |
| 67 | D | 248   | 0.38799  |
| 67 | C | 243   | 0.38017  |
| 67 | L | 149   | 0.23311  |
| 67 | N | 139   | 0.21746  |
| 67 | Q | 131   | 0.20495  |
| 67 | A | 128   | 0.20025  |
| 67 | I | 62    | 0.097    |
| 67 | G | 28    | 0.04381  |
| 67 | E | 24    | 0.03755  |
| 67 | P | 15    | 0.02347  |
| 67 | W | 15    | 0.02347  |
| 67 | M | 10    | 0.01564  |
| 67 | R | 7     | 0.01095  |
| 67 | K | 2     | 0.00313  |
| 68 | A | 50771 | 78.94606 |
| 68 | S | 3133  | 4.87164  |
| 68 | T | 3099  | 4.81877  |
| 68 | V | 1879  | 2.92174  |
| 68 | P | 1207  | 1.87682  |
| 68 | G | 1200  | 1.86593  |
| 68 | L | 720   | 1.11956  |
| 68 | R | 669   | 1.04026  |
| 68 | E | 581   | 0.90342  |
| 68 | I | 320   | 0.49758  |
| 68 | Q | 260   | 0.40429  |



|    |   |       |          |
|----|---|-------|----------|
| 68 | D | 172   | 0.26745  |
| 68 | K | 169   | 0.26279  |
| 68 | H | 53    | 0.08241  |
| 68 | N | 38    | 0.05909  |
| 68 | M | 24    | 0.03732  |
| 68 | Y | 7     | 0.01088  |
| 68 | C | 5     | 0.00777  |
| 68 | F | 2     | 0.00311  |
| 68 | W | 2     | 0.00311  |
| 69 | D | 58224 | 90.19426 |
| 69 | E | 1757  | 2.72175  |
| 69 | N | 1313  | 2.03396  |
| 69 | G | 822   | 1.27335  |
| 69 | A | 782   | 1.21139  |
| 69 | P | 395   | 0.61189  |
| 69 | S | 306   | 0.47402  |
| 69 | H | 261   | 0.40431  |
| 69 | T | 155   | 0.24011  |
| 69 | V | 154   | 0.23856  |
| 69 | Q | 92    | 0.14252  |
| 69 | Y | 90    | 0.13942  |
| 69 | K | 88    | 0.13632  |
| 69 | R | 58    | 0.08985  |
| 69 | L | 34    | 0.05267  |
| 69 | I | 12    | 0.01859  |
| 69 | W | 6     | 0.00929  |
| 69 | F | 3     | 0.00465  |
| 69 | C | 1     | 0.00155  |
| 69 | M | 1     | 0.00155  |
| 70 | S | 60601 | 92.99481 |
| 70 | F | 1856  | 2.84811  |
| 70 | A | 850   | 1.30436  |
| 70 | P | 603   | 0.92533  |
| 70 | T | 316   | 0.48492  |
| 70 | H | 272   | 0.4174   |
| 70 | L | 159   | 0.24399  |
| 70 | V | 101   | 0.15499  |
| 70 | Y | 97    | 0.14885  |
| 70 | D | 65    | 0.09975  |
| 70 | G | 58    | 0.089    |
| 70 | N | 54    | 0.08287  |
| 70 | R | 53    | 0.08133  |
| 70 | K | 18    | 0.02762  |
| 70 | M | 14    | 0.02148  |
| 70 | W | 14    | 0.02148  |
| 70 | E | 11    | 0.01688  |

|    |    |       |          |
|----|----|-------|----------|
| 70 | C  | 10    | 0.01535  |
| 70 | Q  | 9     | 0.01381  |
| 70 | I  | 5     | 0.00767  |
| 71 | V  | 59562 | 90.86915 |
| 71 | M  | 2117  | 3.22974  |
| 71 | L  | 1810  | 2.76138  |
| 71 | A  | 1291  | 1.96958  |
| 71 | I  | 195   | 0.2975   |
| 71 | K  | 134   | 0.20443  |
| 71 | E  | 131   | 0.19986  |
| 71 | G  | 94    | 0.14341  |
| 71 | T  | 93    | 0.14188  |
| 71 | Q  | 20    | 0.03051  |
| 71 | D  | 18    | 0.02746  |
| 71 | F  | 18    | 0.02746  |
| 71 | S  | 16    | 0.02441  |
| 71 | W  | 14    | 0.02136  |
| 71 | P  | 12    | 0.01831  |
| 71 | H  | 9     | 0.01373  |
| 71 | R  | 8     | 0.0122   |
| 71 | Y  | 3     | 0.00458  |
| 71 | C  | 1     | 0.00153  |
| 71 | N  | 1     | 0.00153  |
| 72 | K  | 60940 | 92.82276 |
| 72 | R  | 1444  | 2.19948  |
| 72 | E  | 1210  | 1.84305  |
| 72 | Q  | 685   | 1.04338  |
| 72 | T  | 338   | 0.51484  |
| 72 | N  | 335   | 0.51027  |
| 72 | M  | 189   | 0.28788  |
| 72 | S  | 138   | 0.2102   |
| 72 | A  | 129   | 0.19649  |
| 72 | L  | 113   | 0.17212  |
| 72 | V  | 73    | 0.11119  |
| 72 | G  | 20    | 0.03046  |
| 72 | D  | 14    | 0.02132  |
| 72 | I  | 14    | 0.02132  |
| 72 | W  | 4     | 0.00609  |
| 72 | H  | 3     | 0.00457  |
| 72 | P  | 2     | 0.00305  |
| 72 | Y  | 1     | 0.00152  |
| 73 | NA | 0     | 0        |
| 74 | G  | 63805 | 96.79744 |
| 74 | D  | 1270  | 1.92669  |
| 74 | A  | 298   | 0.45209  |
| 74 | E  | 167   | 0.25335  |

|    |   |       |          |
|----|---|-------|----------|
| 74 | V | 126   | 0.19115  |
| 74 | S | 124   | 0.18812  |
| 74 | C | 31    | 0.04703  |
| 74 | R | 31    | 0.04703  |
| 74 | T | 17    | 0.02579  |
| 74 | N | 16    | 0.02427  |
| 74 | H | 13    | 0.01972  |
| 74 | F | 6     | 0.0091   |
| 74 | P | 5     | 0.00759  |
| 74 | Y | 3     | 0.00455  |
| 74 | L | 2     | 0.00303  |
| 74 | W | 2     | 0.00303  |
| 75 | R | 64375 | 97.50538 |
| 75 | Q | 1471  | 2.22805  |
| 75 | L | 73    | 0.11057  |
| 75 | G | 26    | 0.03938  |
| 75 | H | 20    | 0.03029  |
| 75 | P | 17    | 0.02575  |
| 75 | K | 16    | 0.02423  |
| 75 | W | 12    | 0.01818  |
| 75 | C | 7     | 0.0106   |
| 75 | S | 3     | 0.00454  |
| 75 | M | 1     | 0.00151  |
| 75 | V | 1     | 0.00151  |
| 76 | F | 63672 | 96.37927 |
| 76 | L | 767   | 1.161    |
| 76 | S | 515   | 0.77955  |
| 76 | A | 323   | 0.48892  |
| 76 | V | 252   | 0.38145  |
| 76 | I | 205   | 0.31031  |
| 76 | Y | 188   | 0.28457  |
| 76 | C | 87    | 0.13169  |
| 76 | G | 20    | 0.03027  |
| 76 | W | 15    | 0.02271  |
| 76 | D | 9     | 0.01362  |
| 76 | P | 3     | 0.00454  |
| 76 | T | 3     | 0.00454  |
| 76 | N | 2     | 0.00303  |
| 76 | H | 1     | 0.00151  |
| 76 | Q | 1     | 0.00151  |
| 76 | R | 1     | 0.00151  |
| 77 | T | 62389 | 94.3715  |
| 77 | A | 1655  | 2.5034   |
| 77 | S | 951   | 1.43851  |
| 77 | I | 700   | 1.05884  |
| 77 | V | 114   | 0.17244  |

|    |   |       |          |
|----|---|-------|----------|
| 77 | P | 79    | 0.1195   |
| 77 | N | 67    | 0.10135  |
| 77 | F | 65    | 0.09832  |
| 77 | L | 35    | 0.05294  |
| 77 | D | 22    | 0.03328  |
| 77 | H | 9     | 0.01361  |
| 77 | R | 8     | 0.0121   |
| 77 | Q | 5     | 0.00756  |
| 77 | E | 4     | 0.00605  |
| 77 | K | 2     | 0.00303  |
| 77 | M | 2     | 0.00303  |
| 77 | Y | 2     | 0.00303  |
| 77 | C | 1     | 0.00151  |
| 78 | I | 58277 | 88.11824 |
| 78 | V | 3897  | 5.89249  |
| 78 | T | 965   | 1.45914  |
| 78 | M | 847   | 1.28071  |
| 78 | A | 565   | 0.85431  |
| 78 | L | 545   | 0.82407  |
| 78 | F | 346   | 0.52317  |
| 78 | S | 210   | 0.31753  |
| 78 | G | 174   | 0.2631   |
| 78 | C | 173   | 0.26159  |
| 78 | N | 103   | 0.15574  |
| 78 | D | 17    | 0.0257   |
| 78 | P | 8     | 0.0121   |
| 78 | H | 3     | 0.00454  |
| 78 | R | 2     | 0.00302  |
| 78 | Y | 2     | 0.00302  |
| 78 | K | 1     | 0.00151  |
| 79 | S | 64297 | 97.18998 |
| 79 | A | 485   | 0.73312  |
| 79 | T | 439   | 0.66358  |
| 79 | F | 308   | 0.46557  |
| 79 | P | 298   | 0.45045  |
| 79 | Y | 95    | 0.1436   |
| 79 | D | 70    | 0.10581  |
| 79 | N | 34    | 0.05139  |
| 79 | L | 25    | 0.03779  |
| 79 | V | 25    | 0.03779  |
| 79 | E | 22    | 0.03325  |
| 79 | G | 15    | 0.02267  |
| 79 | I | 15    | 0.02267  |
| 79 | C | 12    | 0.01814  |
| 79 | H | 4     | 0.00605  |
| 79 | R | 4     | 0.00605  |

|    |   |       |          |
|----|---|-------|----------|
| 79 | W | 4     | 0.00605  |
| 79 | M | 2     | 0.00302  |
| 79 | Q | 2     | 0.00302  |
| 80 | R | 56836 | 85.8991  |
| 80 | K | 4126  | 6.23583  |
| 80 | Q | 2100  | 3.17384  |
| 80 | G | 628   | 0.94913  |
| 80 | S | 488   | 0.73754  |
| 80 | L | 333   | 0.50328  |
| 80 | H | 277   | 0.41864  |
| 80 | E | 259   | 0.39144  |
| 80 | T | 216   | 0.32645  |
| 80 | V | 210   | 0.31738  |
| 80 | I | 205   | 0.30983  |
| 80 | A | 171   | 0.25844  |
| 80 | N | 89    | 0.13451  |
| 80 | M | 60    | 0.09068  |
| 80 | Y | 60    | 0.09068  |
| 80 | F | 47    | 0.07103  |
| 80 | W | 46    | 0.06952  |
| 80 | P | 11    | 0.01662  |
| 80 | D | 3     | 0.00453  |
| 80 | C | 1     | 0.00151  |
| 81 | D | 63026 | 95.24572 |
| 81 | A | 811   | 1.22559  |
| 81 | G | 803   | 1.2135   |
| 81 | N | 675   | 1.02007  |
| 81 | E | 398   | 0.60146  |
| 81 | I | 174   | 0.26295  |
| 81 | V | 95    | 0.14357  |
| 81 | H | 83    | 0.12543  |
| 81 | S | 68    | 0.10276  |
| 81 | Y | 15    | 0.02267  |
| 81 | T | 12    | 0.01813  |
| 81 | L | 6     | 0.00907  |
| 81 | P | 2     | 0.00302  |
| 81 | Q | 2     | 0.00302  |
| 81 | F | 1     | 0.00151  |
| 81 | W | 1     | 0.00151  |
| 82 | N | 58949 | 89.08047 |
| 82 | D | 2477  | 3.74311  |
| 82 | S | 1713  | 2.58859  |
| 82 | K | 561   | 0.84775  |
| 82 | T | 430   | 0.64979  |
| 82 | I | 393   | 0.59388  |
| 82 | V | 305   | 0.4609   |

|    |   |       |          |
|----|---|-------|----------|
| 82 | Y | 265   | 0.40045  |
| 82 | G | 235   | 0.35512  |
| 82 | H | 225   | 0.34001  |
| 82 | A | 220   | 0.33245  |
| 82 | R | 179   | 0.27049  |
| 82 | F | 61    | 0.09218  |
| 82 | L | 46    | 0.06951  |
| 82 | E | 37    | 0.05591  |
| 82 | M | 33    | 0.04987  |
| 82 | P | 20    | 0.03022  |
| 82 | Q | 20    | 0.03022  |
| 82 | C | 3     | 0.00453  |
| 82 | W | 3     | 0.00453  |
| 83 | A | 57447 | 86.80811 |
| 83 | T | 3636  | 5.49436  |
| 83 | V | 1113  | 1.68185  |
| 83 | D | 1093  | 1.65163  |
| 83 | S | 960   | 1.45066  |
| 83 | G | 842   | 1.27235  |
| 83 | P | 286   | 0.43217  |
| 83 | N | 204   | 0.30826  |
| 83 | L | 148   | 0.22364  |
| 83 | R | 109   | 0.16471  |
| 83 | I | 86    | 0.12995  |
| 83 | E | 79    | 0.11938  |
| 83 | H | 67    | 0.10124  |
| 83 | F | 38    | 0.05742  |
| 83 | Y | 35    | 0.05289  |
| 83 | K | 12    | 0.01813  |
| 83 | M | 11    | 0.01662  |
| 83 | Q | 8     | 0.01209  |
| 83 | W | 3     | 0.00453  |
| 84 | K | 56737 | 85.72875 |
| 84 | E | 2529  | 3.82128  |
| 84 | R | 1444  | 2.18186  |
| 84 | M | 1126  | 1.70137  |
| 84 | T | 1087  | 1.64244  |
| 84 | Q | 925   | 1.39766  |
| 84 | N | 899   | 1.35838  |
| 84 | A | 336   | 0.50769  |
| 84 | G | 189   | 0.28558  |
| 84 | Y | 183   | 0.27651  |
| 84 | D | 176   | 0.26593  |
| 84 | V | 174   | 0.26291  |
| 84 | L | 170   | 0.25687  |
| 84 | S | 82    | 0.1239   |

|    |   |       |          |
|----|---|-------|----------|
| 84 | W | 40    | 0.06044  |
| 84 | H | 31    | 0.04684  |
| 84 | P | 28    | 0.04231  |
| 84 | I | 19    | 0.02871  |
| 84 | F | 7     | 0.01058  |
| 85 | N | 59612 | 90.07555 |
| 85 | S | 2230  | 3.3696   |
| 85 | D | 1097  | 1.6576   |
| 85 | K | 1034  | 1.56241  |
| 85 | T | 708   | 1.06981  |
| 85 | R | 320   | 0.48353  |
| 85 | G | 257   | 0.38833  |
| 85 | Y | 173   | 0.26141  |
| 85 | A | 161   | 0.24328  |
| 85 | H | 138   | 0.20852  |
| 85 | I | 138   | 0.20852  |
| 85 | E | 115   | 0.17377  |
| 85 | M | 58    | 0.08764  |
| 85 | Q | 54    | 0.0816   |
| 85 | F | 26    | 0.03929  |
| 85 | L | 24    | 0.03626  |
| 85 | V | 16    | 0.02418  |
| 85 | P | 15    | 0.02267  |
| 85 | C | 3     | 0.00453  |
| 85 | W | 1     | 0.00151  |
| 86 | T | 59070 | 89.25522 |
| 86 | M | 2961  | 4.47409  |
| 86 | I | 1237  | 1.86912  |
| 86 | A | 1149  | 1.73615  |
| 86 | S | 825   | 1.24658  |
| 86 | L | 246   | 0.37171  |
| 86 | E | 191   | 0.2886   |
| 86 | V | 181   | 0.27349  |
| 86 | R | 141   | 0.21305  |
| 86 | K | 90    | 0.13599  |
| 86 | P | 33    | 0.04986  |
| 86 | N | 26    | 0.03929  |
| 86 | Q | 13    | 0.01964  |
| 86 | G | 8     | 0.01209  |
| 86 | F | 5     | 0.00756  |
| 86 | W | 2     | 0.00302  |
| 86 | Y | 2     | 0.00302  |
| 86 | D | 1     | 0.00151  |
| 87 | L | 33074 | 49.97431 |
| 87 | V | 27600 | 41.70318 |
| 87 | A | 2031  | 3.06881  |

|    |   |       |          |
|----|---|-------|----------|
| 87 | M | 1942  | 2.93433  |
| 87 | I | 523   | 0.79025  |
| 87 | T | 219   | 0.33091  |
| 87 | P | 175   | 0.26442  |
| 87 | G | 137   | 0.207    |
| 87 | F | 117   | 0.17679  |
| 87 | Q | 102   | 0.15412  |
| 87 | H | 60    | 0.09066  |
| 87 | W | 60    | 0.09066  |
| 87 | E | 59    | 0.08915  |
| 87 | S | 30    | 0.04533  |
| 87 | R | 20    | 0.03022  |
| 87 | D | 9     | 0.0136   |
| 87 | K | 9     | 0.0136   |
| 87 | Y | 8     | 0.01209  |
| 87 | N | 5     | 0.00755  |
| 87 | C | 2     | 0.00302  |
| 88 | Y | 58477 | 88.3592  |
| 88 | F | 1734  | 2.62009  |
| 88 | S | 1383  | 2.08972  |
| 88 | H | 1064  | 1.60771  |
| 88 | T | 663   | 1.0018   |
| 88 | D | 646   | 0.97611  |
| 88 | A | 507   | 0.76608  |
| 88 | N | 429   | 0.64822  |
| 88 | W | 372   | 0.56209  |
| 88 | L | 311   | 0.46992  |
| 88 | C | 169   | 0.25536  |
| 88 | I | 169   | 0.25536  |
| 88 | V | 141   | 0.21305  |
| 88 | R | 61    | 0.09217  |
| 88 | E | 22    | 0.03324  |
| 88 | M | 14    | 0.02115  |
| 88 | P | 8     | 0.01209  |
| 88 | Q | 5     | 0.00756  |
| 88 | G | 4     | 0.00604  |
| 88 | K | 2     | 0.00302  |
| 89 | L | 65502 | 98.97403 |
| 89 | P | 286   | 0.43215  |
| 89 | Q | 115   | 0.17377  |
| 89 | M | 97    | 0.14657  |
| 89 | V | 76    | 0.11484  |
| 89 | A | 34    | 0.05137  |
| 89 | F | 25    | 0.03778  |
| 89 | R | 22    | 0.03324  |
| 89 | S | 10    | 0.01511  |



|    |   |       |          |
|----|---|-------|----------|
| 89 | G | 7     | 0.01058  |
| 89 | I | 4     | 0.00604  |
| 89 | H | 2     | 0.00302  |
| 89 | T | 1     | 0.00151  |
| 90 | Q | 60085 | 90.79164 |
| 90 | E | 1590  | 2.40257  |
| 90 | L | 1411  | 2.1321   |
| 90 | H | 1144  | 1.72865  |
| 90 | R | 1090  | 1.64705  |
| 90 | K | 357   | 0.53945  |
| 90 | D | 181   | 0.2735   |
| 90 | T | 87    | 0.13146  |
| 90 | V | 45    | 0.068    |
| 90 | N | 40    | 0.06044  |
| 90 | S | 36    | 0.0544   |
| 90 | A | 32    | 0.04835  |
| 90 | Y | 31    | 0.04684  |
| 90 | G | 18    | 0.0272   |
| 90 | P | 16    | 0.02418  |
| 90 | I | 9     | 0.0136   |
| 90 | F | 4     | 0.00604  |
| 90 | M | 2     | 0.00302  |
| 90 | W | 1     | 0.00151  |
| 91 | M | 47100 | 71.17061 |
| 91 | L | 16899 | 25.53529 |
| 91 | I | 873   | 1.31915  |
| 91 | V | 485   | 0.73286  |
| 91 | T | 400   | 0.60442  |
| 91 | S | 170   | 0.25688  |
| 91 | A | 110   | 0.16622  |
| 91 | K | 63    | 0.0952   |
| 91 | F | 43    | 0.06498  |
| 91 | Q | 15    | 0.02267  |
| 91 | W | 9     | 0.0136   |
| 91 | R | 7     | 0.01058  |
| 91 | P | 3     | 0.00453  |
| 91 | C | 1     | 0.00151  |
| 91 | G | 1     | 0.00151  |
| 92 | N | 55902 | 84.4709  |
| 92 | D | 4872  | 7.36185  |
| 92 | S | 2584  | 3.90456  |
| 92 | T | 977   | 1.4763   |
| 92 | H | 589   | 0.89001  |
| 92 | I | 273   | 0.41252  |
| 92 | K | 204   | 0.30825  |
| 92 | Y | 191   | 0.28861  |

|    |   |       |          |
|----|---|-------|----------|
| 92 | G | 139   | 0.21004  |
| 92 | R | 139   | 0.21004  |
| 92 | A | 98    | 0.14808  |
| 92 | V | 53    | 0.08009  |
| 92 | L | 44    | 0.06649  |
| 92 | E | 42    | 0.06346  |
| 92 | F | 36    | 0.0544   |
| 92 | M | 16    | 0.02418  |
| 92 | Q | 14    | 0.02115  |
| 92 | P | 5     | 0.00756  |
| 92 | C | 1     | 0.00151  |
| 93 | S | 56493 | 85.37426 |
| 93 | N | 4098  | 6.19305  |
| 93 | G | 1366  | 2.06435  |
| 93 | T | 1038  | 1.56866  |
| 93 | D | 917   | 1.3858   |
| 93 | R | 869   | 1.31326  |
| 93 | A | 484   | 0.73144  |
| 93 | V | 183   | 0.27656  |
| 93 | M | 154   | 0.23273  |
| 93 | I | 150   | 0.22669  |
| 93 | K | 104   | 0.15717  |
| 93 | C | 81    | 0.12241  |
| 93 | L | 59    | 0.08916  |
| 93 | E | 53    | 0.0801   |
| 93 | Y | 38    | 0.05743  |
| 93 | Q | 32    | 0.04836  |
| 93 | H | 29    | 0.04383  |
| 93 | F | 19    | 0.02871  |
| 93 | P | 2     | 0.00302  |
| 93 | W | 2     | 0.00302  |
| 94 | L | 64638 | 97.68328 |
| 94 | P | 520   | 0.78584  |
| 94 | V | 520   | 0.78584  |
| 94 | M | 127   | 0.19193  |
| 94 | T | 113   | 0.17077  |
| 94 | A | 105   | 0.15868  |
| 94 | Q | 103   | 0.15566  |
| 94 | R | 18    | 0.0272   |
| 94 | I | 7     | 0.01058  |
| 94 | H | 5     | 0.00756  |
| 94 | S | 5     | 0.00756  |
| 94 | F | 4     | 0.00604  |
| 94 | C | 3     | 0.00453  |
| 94 | G | 3     | 0.00453  |
| 95 | K | 56784 | 85.81403 |

|    |   |       |          |
|----|---|-------|----------|
| 95 | R | 2317  | 3.50153  |
| 95 | E | 2089  | 3.15697  |
| 95 | Q | 1656  | 2.50261  |
| 95 | N | 1317  | 1.9903   |
| 95 | T | 964   | 1.45683  |
| 95 | S | 337   | 0.50929  |
| 95 | A | 167   | 0.25238  |
| 95 | I | 135   | 0.20402  |
| 95 | L | 101   | 0.15263  |
| 95 | V | 93    | 0.14054  |
| 95 | G | 81    | 0.12241  |
| 95 | D | 60    | 0.09067  |
| 95 | M | 50    | 0.07556  |
| 95 | H | 13    | 0.01965  |
| 95 | Y | 4     | 0.00604  |
| 95 | P | 2     | 0.00302  |
| 95 | W | 1     | 0.00151  |
| 96 | P | 21572 | 32.60038 |
| 96 | T | 21303 | 32.19386 |
| 96 | S | 18757 | 28.34625 |
| 96 | A | 1176  | 1.77721  |
| 96 | I | 1020  | 1.54146  |
| 96 | L | 630   | 0.95208  |
| 96 | F | 453   | 0.68459  |
| 96 | V | 402   | 0.60752  |
| 96 | Y | 265   | 0.40048  |
| 96 | R | 228   | 0.34456  |
| 96 | N | 127   | 0.19193  |
| 96 | D | 62    | 0.0937   |
| 96 | H | 59    | 0.08916  |
| 96 | E | 42    | 0.06347  |
| 96 | G | 29    | 0.04383  |
| 96 | M | 20    | 0.03022  |
| 96 | Q | 19    | 0.02871  |
| 96 | C | 5     | 0.00756  |
| 96 | K | 2     | 0.00302  |
| 97 | E | 61400 | 92.78989 |
| 97 | D | 3381  | 5.10949  |
| 97 | G | 648   | 0.97928  |
| 97 | A | 224   | 0.33852  |
| 97 | K | 141   | 0.21308  |
| 97 | V | 114   | 0.17228  |
| 97 | Q | 113   | 0.17077  |
| 97 | N | 60    | 0.09067  |
| 97 | T | 55    | 0.08312  |
| 97 | S | 22    | 0.03325  |

|     |   |       |          |
|-----|---|-------|----------|
| 97  | H | 3     | 0.00453  |
| 97  | Y | 3     | 0.00453  |
| 97  | L | 2     | 0.00302  |
| 97  | W | 2     | 0.00302  |
| 97  | I | 1     | 0.00151  |
| 97  | P | 1     | 0.00151  |
| 97  | R | 1     | 0.00151  |
| 98  | D | 65529 | 99.02979 |
| 98  | G | 235   | 0.35514  |
| 98  | E | 133   | 0.20099  |
| 98  | Y | 109   | 0.16472  |
| 98  | N | 79    | 0.11939  |
| 98  | V | 61    | 0.09219  |
| 98  | H | 14    | 0.02116  |
| 98  | A | 10    | 0.01511  |
| 98  | T | 1     | 0.00151  |
| 99  | T | 62753 | 94.8475  |
| 99  | S | 1629  | 2.46214  |
| 99  | A | 1200  | 1.81373  |
| 99  | M | 379   | 0.57284  |
| 99  | N | 41    | 0.06197  |
| 99  | R | 36    | 0.05441  |
| 99  | I | 27    | 0.04081  |
| 99  | K | 27    | 0.04081  |
| 99  | P | 27    | 0.04081  |
| 99  | G | 26    | 0.0393   |
| 99  | L | 6     | 0.00907  |
| 99  | D | 5     | 0.00756  |
| 99  | E | 5     | 0.00756  |
| 99  | H | 1     | 0.00151  |
| 100 | A | 62910 | 95.08623 |
| 100 | G | 2710  | 4.09607  |
| 100 | S | 183   | 0.2766   |
| 100 | T | 111   | 0.16777  |
| 100 | V | 104   | 0.15719  |
| 100 | D | 61    | 0.0922   |
| 100 | F | 44    | 0.0665   |
| 100 | P | 14    | 0.02116  |
| 100 | Y | 9     | 0.0136   |
| 100 | C | 5     | 0.00756  |
| 100 | R | 4     | 0.00605  |
| 100 | N | 3     | 0.00453  |
| 100 | E | 1     | 0.00151  |
| 100 | H | 1     | 0.00151  |
| 100 | I | 1     | 0.00151  |
| 101 | V | 24311 | 36.74521 |

|     |   |       |          |
|-----|---|-------|----------|
| 101 | M | 18614 | 28.1344  |
| 101 | L | 16948 | 25.6163  |
| 101 | I | 1536  | 2.32161  |
| 101 | Q | 1221  | 1.8455   |
| 101 | T | 1143  | 1.7276   |
| 101 | R | 1057  | 1.59762  |
| 101 | A | 416   | 0.62877  |
| 101 | K | 374   | 0.56529  |
| 101 | E | 153   | 0.23125  |
| 101 | P | 132   | 0.19951  |
| 101 | H | 91    | 0.13754  |
| 101 | G | 46    | 0.06953  |
| 101 | S | 42    | 0.06348  |
| 101 | D | 29    | 0.04383  |
| 101 | N | 27    | 0.04081  |
| 101 | F | 13    | 0.01965  |
| 101 | C | 3     | 0.00453  |
| 101 | W | 3     | 0.00453  |
| 101 | Y | 2     | 0.00302  |
| 102 | Y | 65070 | 98.35397 |
| 102 | H | 445   | 0.67262  |
| 102 | F | 346   | 0.52298  |
| 102 | C | 193   | 0.29172  |
| 102 | N | 62    | 0.09371  |
| 102 | S | 12    | 0.01814  |
| 102 | L | 9     | 0.0136   |
| 102 | D | 7     | 0.01058  |
| 102 | T | 7     | 0.01058  |
| 102 | V | 6     | 0.00907  |
| 102 | Q | 1     | 0.00151  |
| 102 | R | 1     | 0.00151  |
| 103 | Y | 61883 | 93.60328 |
| 103 | F | 2237  | 3.38365  |
| 103 | H | 733   | 1.10872  |
| 103 | S | 347   | 0.52487  |
| 103 | C | 169   | 0.25563  |
| 103 | W | 169   | 0.25563  |
| 103 | T | 118   | 0.17848  |
| 103 | L | 96    | 0.14521  |
| 103 | R | 96    | 0.14521  |
| 103 | I | 86    | 0.13008  |
| 103 | V | 81    | 0.12252  |
| 103 | N | 65    | 0.09832  |
| 103 | M | 10    | 0.01513  |
| 103 | A | 9     | 0.01361  |
| 103 | D | 6     | 0.00908  |

|     |   |       |          |
|-----|---|-------|----------|
| 103 | Q | 5     | 0.00756  |
| 103 | K | 2     | 0.00303  |
| 104 | C | 65964 | 99.82446 |
| 104 | R | 57    | 0.08626  |
| 104 | Y | 30    | 0.0454   |
| 104 | S | 19    | 0.02875  |
| 104 | W | 8     | 0.01211  |
| 104 | F | 2     | 0.00303  |
| 105 | A | 1015  | 93.37626 |
| 105 | T | 41    | 3.77185  |
| 105 | V | 25    | 2.29991  |
| 105 | E | 4     | 0.36799  |
| 105 | R | 1     | 0.092    |
| 105 | S | 1     | 0.092    |
| 106 | A | 123   | 40.19608 |
| 106 | K | 57    | 18.62745 |
| 106 | R | 55    | 17.97386 |
| 106 | G | 34    | 11.11111 |
| 106 | S | 8     | 2.61438  |
| 106 | V | 8     | 2.61438  |
| 106 | I | 7     | 2.28758  |
| 106 | T | 6     | 1.96078  |
| 106 | Q | 4     | 1.30719  |
| 106 | E | 3     | 0.98039  |
| 106 | C | 1     | 0.3268   |

**Table S4: 1-VHH**

| The positions of amino acids | Amino acids | Counts | Percentage(%) |
|------------------------------|-------------|--------|---------------|
| 1                            | H           | 33972  | 67.90597      |
| 1                            | D           | 9673   | 19.33517      |
| 1                            | Q           | 4483   | 8.96098       |
| 1                            | E           | 771    | 1.54114       |
| 1                            | S           | 423    | 0.84553       |
| 1                            | M           | 225    | 0.44975       |
| 1                            | L           | 104    | 0.20788       |
| 1                            | P           | 91     | 0.1819        |
| 1                            | A           | 90     | 0.1799        |
| 1                            | Y           | 80     | 0.15991       |
| 1                            | R           | 27     | 0.05397       |
| 1                            | W           | 22     | 0.04398       |
| 1                            | G           | 19     | 0.03798       |
| 1                            | V           | 15     | 0.02998       |
| 1                            | N           | 13     | 0.02599       |
| 1                            | C           | 10     | 0.01999       |
| 1                            | I           | 4      | 0.008         |
| 1                            | T           | 3      | 0.006         |
| 1                            | K           | 2      | 0.004         |
| 1                            | F           | 1      | 0.002         |
| 2                            | V           | 49374  | 98.27432      |
| 2                            | C           | 407    | 0.8101        |
| 2                            | L           | 103    | 0.20501       |
| 2                            | M           | 87     | 0.17317       |
| 2                            | G           | 72     | 0.14331       |
| 2                            | W           | 61     | 0.12141       |
| 2                            | A           | 49     | 0.09753       |
| 2                            | H           | 27     | 0.05374       |
| 2                            | E           | 18     | 0.03583       |
| 2                            | Q           | 15     | 0.02986       |
| 2                            | S           | 10     | 0.0199        |
| 2                            | D           | 8      | 0.01592       |
| 2                            | R           | 6      | 0.01194       |
| 2                            | P           | 4      | 0.00796       |
| 3                            | Q           | 52971  | 98.66083      |
| 3                            | A           | 283    | 0.5271        |
| 3                            | S           | 112    | 0.2086        |
| 3                            | P           | 60     | 0.11175       |
| 3                            | V           | 47     | 0.08754       |
| 3                            | L           | 45     | 0.08381       |
| 3                            | C           | 43     | 0.08009       |
| 3                            | R           | 42     | 0.07823       |
| 3                            | E           | 25     | 0.04656       |

|   |   |       |          |
|---|---|-------|----------|
| 3 | H | 23    | 0.04284  |
| 3 | K | 22    | 0.04098  |
| 3 | W | 7     | 0.01304  |
| 3 | G | 5     | 0.00931  |
| 3 | M | 5     | 0.00931  |
| 4 | L | 53465 | 98.92133 |
| 4 | A | 205   | 0.37929  |
| 4 | W | 114   | 0.21092  |
| 4 | Q | 57    | 0.10546  |
| 4 | P | 56    | 0.10361  |
| 4 | V | 47    | 0.08696  |
| 4 | M | 41    | 0.07586  |
| 4 | S | 24    | 0.0444   |
| 4 | R | 22    | 0.0407   |
| 4 | E | 5     | 0.00925  |
| 4 | H | 4     | 0.0074   |
| 4 | C | 3     | 0.00555  |
| 4 | D | 2     | 0.0037   |
| 4 | F | 1     | 0.00185  |
| 4 | K | 1     | 0.00185  |
| 4 | T | 1     | 0.00185  |
| 5 | V | 54148 | 99.11407 |
| 5 | G | 169   | 0.30934  |
| 5 | W | 118   | 0.21599  |
| 5 | L | 57    | 0.10433  |
| 5 | E | 47    | 0.08603  |
| 5 | A | 42    | 0.07688  |
| 5 | M | 24    | 0.04393  |
| 5 | S | 8     | 0.01464  |
| 5 | F | 6     | 0.01098  |
| 5 | T | 5     | 0.00915  |
| 5 | Q | 4     | 0.00732  |
| 5 | R | 2     | 0.00366  |
| 5 | C | 1     | 0.00183  |
| 5 | K | 1     | 0.00183  |
| 6 | E | 54301 | 99.21071 |
| 6 | G | 146   | 0.26675  |
| 6 | S | 111   | 0.2028   |
| 6 | A | 59    | 0.1078   |
| 6 | V | 56    | 0.10231  |
| 6 | K | 23    | 0.04202  |
| 6 | M | 10    | 0.01827  |
| 6 | W | 9     | 0.01644  |
| 6 | Q | 7     | 0.01279  |
| 6 | D | 3     | 0.00548  |
| 6 | Y | 3     | 0.00548  |



|    |    |       |          |
|----|----|-------|----------|
| 6  | R  | 2     | 0.00365  |
| 6  | C  | 1     | 0.00183  |
| 6  | F  | 1     | 0.00183  |
| 6  | L  | 1     | 0.00183  |
| 7  | S  | 54454 | 99.29613 |
| 7  | L  | 106   | 0.19329  |
| 7  | V  | 103   | 0.18782  |
| 7  | F  | 50    | 0.09117  |
| 7  | Y  | 37    | 0.06747  |
| 7  | P  | 22    | 0.04012  |
| 7  | E  | 18    | 0.03282  |
| 7  | A  | 17    | 0.031    |
| 7  | G  | 17    | 0.031    |
| 7  | T  | 11    | 0.02006  |
| 7  | C  | 3     | 0.00547  |
| 7  | D  | 2     | 0.00365  |
| 8  | G  | 54704 | 99.62847 |
| 8  | W  | 108   | 0.19669  |
| 8  | E  | 19    | 0.0346   |
| 8  | S  | 19    | 0.0346   |
| 8  | V  | 18    | 0.03278  |
| 8  | R  | 16    | 0.02914  |
| 8  | L  | 7     | 0.01275  |
| 8  | D  | 5     | 0.00911  |
| 8  | H  | 4     | 0.00728  |
| 8  | A  | 3     | 0.00546  |
| 8  | Q  | 3     | 0.00546  |
| 8  | P  | 2     | 0.00364  |
| 9  | G  | 54668 | 99.39636 |
| 9  | E  | 104   | 0.18909  |
| 9  | R  | 89    | 0.16182  |
| 9  | V  | 71    | 0.12909  |
| 9  | M  | 34    | 0.06182  |
| 9  | A  | 15    | 0.02727  |
| 9  | S  | 6     | 0.01091  |
| 9  | D  | 5     | 0.00909  |
| 9  | P  | 4     | 0.00727  |
| 9  | W  | 4     | 0.00727  |
| 10 | NA | 0     | 0        |
| 11 | G  | 51086 | 92.7841  |
| 11 | D  | 2078  | 3.77413  |
| 11 | A  | 978   | 1.77628  |
| 11 | E  | 362   | 0.65748  |
| 11 | S  | 195   | 0.35417  |
| 11 | N  | 103   | 0.18707  |
| 11 | R  | 84    | 0.15256  |

|    |   |       |          |
|----|---|-------|----------|
| 11 | V | 81    | 0.14711  |
| 11 | K | 18    | 0.03269  |
| 11 | C | 17    | 0.03088  |
| 11 | Q | 17    | 0.03088  |
| 11 | T | 17    | 0.03088  |
| 11 | W | 9     | 0.01635  |
| 11 | F | 3     | 0.00545  |
| 11 | H | 3     | 0.00545  |
| 11 | I | 2     | 0.00363  |
| 11 | L | 2     | 0.00363  |
| 11 | Y | 2     | 0.00363  |
| 11 | M | 1     | 0.00182  |
| 11 | P | 1     | 0.00182  |
| 12 | S | 50793 | 92.20506 |
| 12 | L | 2322  | 4.21515  |
| 12 | T | 557   | 1.01113  |
| 12 | P | 526   | 0.95485  |
| 12 | A | 451   | 0.8187   |
| 12 | E | 151   | 0.27411  |
| 12 | V | 83    | 0.15067  |
| 12 | Q | 43    | 0.07806  |
| 12 | D | 32    | 0.05809  |
| 12 | W | 29    | 0.05264  |
| 12 | M | 26    | 0.0472   |
| 12 | H | 23    | 0.04175  |
| 12 | F | 16    | 0.02904  |
| 12 | R | 11    | 0.01997  |
| 12 | Y | 6     | 0.01089  |
| 12 | K | 5     | 0.00908  |
| 12 | N | 5     | 0.00908  |
| 12 | C | 4     | 0.00726  |
| 12 | G | 3     | 0.00545  |
| 12 | I | 1     | 0.00182  |
| 13 | V | 52969 | 96.1133  |
| 13 | A | 1617  | 2.93408  |
| 13 | M | 143   | 0.25948  |
| 13 | E | 118   | 0.21411  |
| 13 | G | 114   | 0.20686  |
| 13 | L | 54    | 0.09798  |
| 13 | I | 43    | 0.07802  |
| 13 | T | 21    | 0.0381   |
| 13 | K | 14    | 0.0254   |
| 13 | F | 6     | 0.01089  |
| 13 | R | 4     | 0.00726  |
| 13 | C | 3     | 0.00544  |
| 13 | S | 3     | 0.00544  |

|    |   |       |          |
|----|---|-------|----------|
| 13 | P | 1     | 0.00181  |
| 13 | W | 1     | 0.00181  |
| 14 | Q | 50953 | 92.41833 |
| 14 | E | 1741  | 3.15782  |
| 14 | R | 854   | 1.54898  |
| 14 | P | 453   | 0.82165  |
| 14 | K | 287   | 0.52056  |
| 14 | H | 220   | 0.39904  |
| 14 | L | 214   | 0.38815  |
| 14 | D | 146   | 0.26481  |
| 14 | T | 66    | 0.11971  |
| 14 | A | 60    | 0.10883  |
| 14 | S | 48    | 0.08706  |
| 14 | N | 25    | 0.04534  |
| 14 | M | 20    | 0.03628  |
| 14 | G | 13    | 0.02358  |
| 14 | C | 12    | 0.02177  |
| 14 | V | 9     | 0.01632  |
| 14 | Y | 5     | 0.00907  |
| 14 | W | 4     | 0.00726  |
| 14 | I | 3     | 0.00544  |
| 15 | A | 39580 | 71.77051 |
| 15 | T | 4991  | 9.05019  |
| 15 | P | 4743  | 8.60049  |
| 15 | V | 3911  | 7.09183  |
| 15 | S | 885   | 1.60477  |
| 15 | D | 305   | 0.55306  |
| 15 | I | 158   | 0.2865   |
| 15 | G | 154   | 0.27925  |
| 15 | E | 131   | 0.23754  |
| 15 | N | 102   | 0.18496  |
| 15 | H | 78    | 0.14144  |
| 15 | R | 42    | 0.07616  |
| 15 | F | 32    | 0.05803  |
| 15 | L | 26    | 0.04715  |
| 15 | Q | 5     | 0.00907  |
| 15 | C | 3     | 0.00544  |
| 15 | Y | 2     | 0.00363  |
| 16 | G | 54798 | 99.29872 |
| 16 | E | 145   | 0.26275  |
| 16 | R | 119   | 0.21564  |
| 16 | A | 38    | 0.06886  |
| 16 | V | 25    | 0.0453   |
| 16 | L | 21    | 0.03805  |
| 16 | W | 15    | 0.02718  |
| 16 | D | 8     | 0.0145   |

|    |   |       |          |
|----|---|-------|----------|
| 16 | S | 8     | 0.0145   |
| 16 | T | 6     | 0.01087  |
| 16 | M | 1     | 0.00181  |
| 16 | Q | 1     | 0.00181  |
| 17 | G | 52047 | 94.27609 |
| 17 | E | 2018  | 3.65533  |
| 17 | R | 259   | 0.46914  |
| 17 | D | 208   | 0.37676  |
| 17 | K | 159   | 0.28801  |
| 17 | Q | 158   | 0.2862   |
| 17 | S | 99    | 0.17933  |
| 17 | A | 77    | 0.13948  |
| 17 | V | 59    | 0.10687  |
| 17 | W | 42    | 0.07608  |
| 17 | T | 40    | 0.07245  |
| 17 | M | 29    | 0.05253  |
| 17 | N | 9     | 0.0163   |
| 17 | C | 2     | 0.00362  |
| 17 | L | 1     | 0.00181  |
| 18 | S | 53882 | 97.53457 |
| 18 | T | 438   | 0.79285  |
| 18 | A | 300   | 0.54305  |
| 18 | P | 299   | 0.54124  |
| 18 | F | 145   | 0.26247  |
| 18 | N | 62    | 0.11223  |
| 18 | Y | 24    | 0.04344  |
| 18 | H | 20    | 0.0362   |
| 18 | D | 14    | 0.02534  |
| 18 | L | 12    | 0.02172  |
| 18 | G | 10    | 0.0181   |
| 18 | C | 8     | 0.01448  |
| 18 | V | 7     | 0.01267  |
| 18 | E | 6     | 0.01086  |
| 18 | R | 6     | 0.01086  |
| 18 | I | 3     | 0.00543  |
| 18 | K | 3     | 0.00543  |
| 18 | W | 3     | 0.00543  |
| 18 | Q | 2     | 0.00362  |
| 19 | L | 54302 | 98.23082 |
| 19 | P | 216   | 0.39074  |
| 19 | V | 187   | 0.33828  |
| 19 | M | 182   | 0.32923  |
| 19 | R | 141   | 0.25507  |
| 19 | Q | 131   | 0.23698  |
| 19 | A | 37    | 0.06693  |
| 19 | T | 30    | 0.05427  |

|    |   |       |          |
|----|---|-------|----------|
| 19 | H | 20    | 0.03618  |
| 19 | S | 16    | 0.02894  |
| 19 | W | 6     | 0.01085  |
| 19 | I | 5     | 0.00904  |
| 19 | F | 3     | 0.00543  |
| 19 | C | 2     | 0.00362  |
| 19 | E | 1     | 0.00181  |
| 19 | G | 1     | 0.00181  |
| 20 | R | 42144 | 76.21666 |
| 20 | T | 5816  | 10.51813 |
| 20 | K | 3678  | 6.6516   |
| 20 | N | 1444  | 2.61145  |
| 20 | S | 964   | 1.74338  |
| 20 | G | 296   | 0.53531  |
| 20 | A | 227   | 0.41053  |
| 20 | I | 191   | 0.34542  |
| 20 | L | 133   | 0.24053  |
| 20 | V | 130   | 0.2351   |
| 20 | E | 113   | 0.20436  |
| 20 | Q | 78    | 0.14106  |
| 20 | M | 51    | 0.09223  |
| 20 | W | 16    | 0.02894  |
| 20 | D | 5     | 0.00904  |
| 20 | C | 4     | 0.00723  |
| 20 | H | 4     | 0.00723  |
| 20 | Y | 1     | 0.00181  |
| 21 | L | 53769 | 97.13661 |
| 21 | V | 664   | 1.19955  |
| 21 | I | 481   | 0.86895  |
| 21 | P | 243   | 0.43899  |
| 21 | H | 77    | 0.1391   |
| 21 | F | 58    | 0.10478  |
| 21 | G | 22    | 0.03974  |
| 21 | R | 21    | 0.03794  |
| 21 | A | 8     | 0.01445  |
| 21 | T | 4     | 0.00723  |
| 21 | S | 3     | 0.00542  |
| 21 | C | 1     | 0.00181  |
| 21 | E | 1     | 0.00181  |
| 21 | M | 1     | 0.00181  |
| 21 | Q | 1     | 0.00181  |
| 22 | S | 52526 | 94.84823 |
| 22 | T | 1264  | 2.28245  |
| 22 | A | 1038  | 1.87436  |
| 22 | P | 220   | 0.39726  |
| 22 | F | 110   | 0.19863  |

|    |   |       |          |
|----|---|-------|----------|
| 22 | V | 41    | 0.07404  |
| 22 | E | 33    | 0.05959  |
| 22 | Y | 27    | 0.04875  |
| 22 | R | 26    | 0.04695  |
| 22 | N | 21    | 0.03792  |
| 22 | G | 16    | 0.02889  |
| 22 | Q | 16    | 0.02889  |
| 22 | K | 11    | 0.01986  |
| 22 | I | 7     | 0.01264  |
| 22 | L | 6     | 0.01083  |
| 22 | C | 5     | 0.00903  |
| 22 | D | 5     | 0.00903  |
| 22 | H | 4     | 0.00722  |
| 22 | M | 3     | 0.00542  |
| 23 | C | 54974 | 99.20598 |
| 23 | R | 233   | 0.42047  |
| 23 | Y | 81    | 0.14617  |
| 23 | S | 68    | 0.12271  |
| 23 | W | 22    | 0.0397   |
| 23 | F | 18    | 0.03248  |
| 23 | G | 10    | 0.01805  |
| 23 | P | 3     | 0.00541  |
| 23 | T | 2     | 0.00361  |
| 23 | A | 1     | 0.0018   |
| 23 | L | 1     | 0.0018   |
| 23 | Q | 1     | 0.0018   |
| 24 | A | 21646 | 39.05106 |
| 24 | V | 13346 | 24.07721 |
| 24 | T | 9856  | 17.78099 |
| 24 | E | 2614  | 4.71586  |
| 24 | S | 2305  | 4.1584   |
| 24 | K | 2034  | 3.66949  |
| 24 | L | 746   | 1.34584  |
| 24 | Q | 720   | 1.29894  |
| 24 | I | 523   | 0.94353  |
| 24 | G | 489   | 0.88219  |
| 24 | R | 474   | 0.85513  |
| 24 | D | 461   | 0.83168  |
| 24 | P | 93    | 0.16778  |
| 24 | N | 48    | 0.0866   |
| 24 | H | 31    | 0.05593  |
| 24 | Y | 18    | 0.03247  |
| 24 | F | 11    | 0.01984  |
| 24 | M | 10    | 0.01804  |
| 24 | C | 4     | 0.00722  |
| 24 | W | 1     | 0.0018   |

|    |   |       |          |
|----|---|-------|----------|
| 25 | A | 33961 | 61.24285 |
| 25 | V | 8504  | 15.33551 |
| 25 | T | 2533  | 4.56783  |
| 25 | G | 1842  | 3.32173  |
| 25 | I | 1719  | 3.09992  |
| 25 | P | 1377  | 2.48318  |
| 25 | S | 1052  | 1.8971   |
| 25 | H | 1024  | 1.84661  |
| 25 | F | 757   | 1.36512  |
| 25 | L | 709   | 1.27856  |
| 25 | Y | 532   | 0.95937  |
| 25 | D | 476   | 0.85838  |
| 25 | R | 384   | 0.69248  |
| 25 | N | 169   | 0.30476  |
| 25 | M | 152   | 0.27411  |
| 25 | E | 137   | 0.24706  |
| 25 | Q | 56    | 0.10099  |
| 25 | W | 32    | 0.05771  |
| 25 | K | 20    | 0.03607  |
| 25 | C | 17    | 0.03066  |
| 26 | S | 48637 | 87.68953 |
| 26 | P | 2354  | 4.24412  |
| 26 | T | 1602  | 2.88831  |
| 26 | A | 739   | 1.33237  |
| 26 | F | 377   | 0.67971  |
| 26 | R | 287   | 0.51744  |
| 26 | H | 258   | 0.46516  |
| 26 | D | 221   | 0.39845  |
| 26 | Y | 205   | 0.3696   |
| 26 | G | 127   | 0.22897  |
| 26 | V | 125   | 0.22537  |
| 26 | N | 121   | 0.21816  |
| 26 | I | 120   | 0.21635  |
| 26 | L | 116   | 0.20914  |
| 26 | Q | 62    | 0.11178  |
| 26 | E | 47    | 0.08474  |
| 26 | K | 37    | 0.06671  |
| 26 | W | 16    | 0.02885  |
| 26 | C | 7     | 0.01262  |
| 26 | M | 7     | 0.01262  |
| 27 | G | 43443 | 78.28837 |
| 27 | E | 2364  | 4.26015  |
| 27 | R | 1745  | 3.14465  |
| 27 | A | 1644  | 2.96264  |
| 27 | V | 1186  | 2.13728  |
| 27 | F | 928   | 1.67234  |

|    |   |       |          |
|----|---|-------|----------|
| 27 | K | 741   | 1.33535  |
| 27 | D | 721   | 1.29931  |
| 27 | L | 605   | 1.09027  |
| 27 | T | 572   | 1.0308   |
| 27 | S | 430   | 0.7749   |
| 27 | P | 280   | 0.50459  |
| 27 | Q | 253   | 0.45593  |
| 27 | N | 192   | 0.346    |
| 27 | M | 140   | 0.25229  |
| 27 | I | 134   | 0.24148  |
| 27 | W | 58    | 0.10452  |
| 27 | Y | 38    | 0.06848  |
| 27 | H | 15    | 0.02703  |
| 27 | C | 2     | 0.0036   |
| 28 | Y | 22772 | 41.03285 |
| 28 | F | 8272  | 14.90531 |
| 28 | D | 7041  | 12.68717 |
| 28 | N | 3436  | 6.19133  |
| 28 | S | 2651  | 4.77683  |
| 28 | L | 2076  | 3.74074  |
| 28 | H | 1594  | 2.87223  |
| 28 | V | 1434  | 2.58392  |
| 28 | A | 1100  | 1.98209  |
| 28 | R | 1061  | 1.91182  |
| 28 | I | 796   | 1.43431  |
| 28 | G | 616   | 1.10997  |
| 28 | P | 553   | 0.99645  |
| 28 | T | 511   | 0.92077  |
| 28 | W | 467   | 0.84149  |
| 28 | K | 406   | 0.73157  |
| 28 | E | 314   | 0.5658   |
| 28 | C | 141   | 0.25407  |
| 28 | M | 135   | 0.24326  |
| 28 | Q | 121   | 0.21803  |
| 29 | T | 31116 | 56.03458 |
| 29 | I | 5443  | 9.80191  |
| 29 | S | 4507  | 8.11633  |
| 29 | P | 2901  | 5.2242   |
| 29 | A | 2348  | 4.22835  |
| 29 | R | 1844  | 3.32073  |
| 29 | N | 1037  | 1.86746  |
| 29 | G | 1012  | 1.82244  |
| 29 | D | 909   | 1.63695  |
| 29 | V | 835   | 1.50369  |
| 29 | L | 776   | 1.39744  |
| 29 | M | 729   | 1.3128   |



|    |   |       |          |
|----|---|-------|----------|
| 29 | F | 541   | 0.97425  |
| 29 | K | 433   | 0.77976  |
| 29 | Y | 326   | 0.58707  |
| 29 | E | 278   | 0.50063  |
| 29 | H | 263   | 0.47362  |
| 29 | Q | 144   | 0.25932  |
| 29 | W | 72    | 0.12966  |
| 29 | C | 16    | 0.02881  |
| 30 | Y | 19514 | 35.13061 |
| 30 | F | 7561  | 13.6119  |
| 30 | S | 5089  | 9.16161  |
| 30 | I | 4208  | 7.57557  |
| 30 | D | 3268  | 5.88331  |
| 30 | L | 2261  | 4.07043  |
| 30 | V | 2135  | 3.84359  |
| 30 | A | 1862  | 3.35212  |
| 30 | H | 1860  | 3.34852  |
| 30 | G | 1714  | 3.08568  |
| 30 | N | 1510  | 2.71842  |
| 30 | R | 1179  | 2.12253  |
| 30 | T | 965   | 1.73727  |
| 30 | P | 604   | 1.08737  |
| 30 | W | 515   | 0.92714  |
| 30 | K | 358   | 0.6445   |
| 30 | Q | 305   | 0.54908  |
| 30 | E | 286   | 0.51488  |
| 30 | M | 197   | 0.35465  |
| 30 | C | 156   | 0.28084  |
| 31 | S | 23995 | 43.17511 |
| 31 | G | 5999  | 10.79423 |
| 31 | D | 5404  | 9.72362  |
| 31 | R | 4176  | 7.51403  |
| 31 | N | 4141  | 7.45106  |
| 31 | T | 2903  | 5.22348  |
| 31 | A | 1558  | 2.80337  |
| 31 | E | 1238  | 2.22758  |
| 31 | K | 1201  | 2.161    |
| 31 | V | 997   | 1.79394  |
| 31 | I | 831   | 1.49525  |
| 31 | P | 521   | 0.93746  |
| 31 | C | 513   | 0.92306  |
| 31 | M | 475   | 0.85469  |
| 31 | H | 437   | 0.78631  |
| 31 | L | 426   | 0.76652  |
| 31 | Y | 299   | 0.538    |
| 31 | F | 235   | 0.42284  |

|    |   |       |          |
|----|---|-------|----------|
| 31 | Q | 131   | 0.23571  |
| 31 | W | 96    | 0.17274  |
| 32 | S | 14406 | 25.90262 |
| 32 | R | 10800 | 19.41887 |
| 32 | T | 6903  | 12.4119  |
| 32 | D | 5712  | 10.27043 |
| 32 | N | 3941  | 7.08609  |
| 32 | G | 3079  | 5.53618  |
| 32 | A | 2223  | 3.99705  |
| 32 | P | 1010  | 1.81602  |
| 32 | L | 979   | 1.76028  |
| 32 | V | 920   | 1.6542   |
| 32 | K | 915   | 1.64521  |
| 32 | I | 848   | 1.52474  |
| 32 | Y | 775   | 1.39348  |
| 32 | E | 731   | 1.31437  |
| 32 | H | 612   | 1.1004   |
| 32 | M | 587   | 1.05545  |
| 32 | Q | 429   | 0.77136  |
| 32 | F | 404   | 0.72641  |
| 32 | W | 218   | 0.39197  |
| 32 | C | 124   | 0.22296  |
| 33 | Y | 24811 | 44.57039 |
| 33 | N | 6861  | 12.32508 |
| 33 | S | 3389  | 6.08799  |
| 33 | H | 3056  | 5.48979  |
| 33 | C | 2408  | 4.32572  |
| 33 | F | 2329  | 4.18381  |
| 33 | A | 2069  | 3.71674  |
| 33 | G | 1691  | 3.03771  |
| 33 | R | 1300  | 2.33532  |
| 33 | L | 1114  | 2.00119  |
| 33 | D | 1091  | 1.95987  |
| 33 | T | 1065  | 1.91316  |
| 33 | K | 963   | 1.72993  |
| 33 | V | 954   | 1.71376  |
| 33 | I | 843   | 1.51436  |
| 33 | P | 443   | 0.7958   |
| 33 | W | 381   | 0.68443  |
| 33 | E | 378   | 0.67904  |
| 33 | M | 292   | 0.52455  |
| 33 | Q | 229   | 0.41137  |
| 34 | C | 41297 | 74.0209  |
| 34 | D | 3985  | 7.14273  |
| 34 | S | 2088  | 3.74254  |
| 34 | G | 1672  | 2.9969   |

|    |    |       |          |
|----|----|-------|----------|
| 34 | Y  | 1436  | 2.57389  |
| 34 | A  | 1043  | 1.86948  |
| 34 | F  | 801   | 1.43572  |
| 34 | E  | 794   | 1.42317  |
| 34 | R  | 482   | 0.86394  |
| 34 | V  | 470   | 0.84243  |
| 34 | L  | 324   | 0.58074  |
| 34 | T  | 311   | 0.55744  |
| 34 | N  | 261   | 0.46782  |
| 34 | W  | 217   | 0.38895  |
| 34 | H  | 196   | 0.35131  |
| 34 | P  | 128   | 0.22943  |
| 34 | I  | 107   | 0.19179  |
| 34 | Q  | 84    | 0.15056  |
| 34 | K  | 73    | 0.13085  |
| 34 | M  | 22    | 0.03943  |
| 35 | NA | 0     | 0        |
| 36 | NA | 0     | 0        |
| 37 | NA | 0     | 0        |
| 38 | NA | 0     | 0        |
| 39 | M  | 42532 | 75.98121 |
| 39 | L  | 5621  | 10.04162 |
| 39 | V  | 3588  | 6.40978  |
| 39 | I  | 1674  | 2.99051  |
| 39 | W  | 518   | 0.92538  |
| 39 | T  | 463   | 0.82713  |
| 39 | K  | 440   | 0.78604  |
| 39 | R  | 351   | 0.62704  |
| 39 | A  | 304   | 0.54308  |
| 39 | F  | 166   | 0.29655  |
| 39 | G  | 112   | 0.20008  |
| 39 | Y  | 61    | 0.10897  |
| 39 | Q  | 57    | 0.10183  |
| 39 | S  | 42    | 0.07503  |
| 39 | E  | 19    | 0.03394  |
| 39 | C  | 13    | 0.02322  |
| 39 | P  | 8     | 0.01429  |
| 39 | N  | 5     | 0.00893  |
| 39 | H  | 2     | 0.00357  |
| 39 | D  | 1     | 0.00179  |
| 40 | G  | 38866 | 68.75652 |
| 40 | A  | 12571 | 22.23893 |
| 40 | S  | 1362  | 2.40947  |
| 40 | M  | 920   | 1.62754  |
| 40 | D  | 882   | 1.56032  |
| 40 | T  | 480   | 0.84915  |

|    |   |       |          |
|----|---|-------|----------|
| 40 | V | 294   | 0.52011  |
| 40 | N | 279   | 0.49357  |
| 40 | E | 195   | 0.34497  |
| 40 | R | 175   | 0.30959  |
| 40 | H | 118   | 0.20875  |
| 40 | K | 99    | 0.17514  |
| 40 | I | 94    | 0.16629  |
| 40 | Y | 67    | 0.11853  |
| 40 | C | 38    | 0.06722  |
| 40 | F | 31    | 0.05484  |
| 40 | L | 26    | 0.046    |
| 40 | W | 16    | 0.02831  |
| 40 | Q | 11    | 0.01946  |
| 40 | P | 3     | 0.00531  |
| 41 | W | 56312 | 99.02752 |
| 41 | R | 203   | 0.35699  |
| 41 | Y | 178   | 0.31302  |
| 41 | F | 64    | 0.11255  |
| 41 | I | 28    | 0.04924  |
| 41 | L | 22    | 0.03869  |
| 41 | C | 15    | 0.02638  |
| 41 | G | 15    | 0.02638  |
| 41 | S | 14    | 0.02462  |
| 41 | A | 3     | 0.00528  |
| 41 | V | 3     | 0.00528  |
| 41 | H | 2     | 0.00352  |
| 41 | P | 2     | 0.00352  |
| 41 | Q | 2     | 0.00352  |
| 41 | M | 1     | 0.00176  |
| 41 | N | 1     | 0.00176  |
| 42 | F | 45658 | 79.84262 |
| 42 | Y | 8160  | 14.26948 |
| 42 | V | 822   | 1.43744  |
| 42 | L | 798   | 1.39547  |
| 42 | I | 682   | 1.19262  |
| 42 | S | 418   | 0.73096  |
| 42 | W | 256   | 0.44767  |
| 42 | H | 137   | 0.23957  |
| 42 | A | 80    | 0.1399   |
| 42 | C | 53    | 0.09268  |
| 42 | T | 45    | 0.07869  |
| 42 | N | 23    | 0.04022  |
| 42 | K | 12    | 0.02098  |
| 42 | M | 9     | 0.01574  |
| 42 | P | 9     | 0.01574  |
| 42 | D | 7     | 0.01224  |

|    |   |       |          |
|----|---|-------|----------|
| 42 | G | 7     | 0.01224  |
| 42 | Q | 6     | 0.01049  |
| 42 | R | 3     | 0.00525  |
| 43 | R | 56743 | 98.79    |
| 43 | H | 272   | 0.47355  |
| 43 | C | 126   | 0.21937  |
| 43 | S | 76    | 0.13232  |
| 43 | L | 67    | 0.11665  |
| 43 | Q | 53    | 0.09227  |
| 43 | I | 27    | 0.04701  |
| 43 | P | 19    | 0.03308  |
| 43 | G | 15    | 0.02612  |
| 43 | Y | 15    | 0.02612  |
| 43 | W | 10    | 0.01741  |
| 43 | K | 6     | 0.01045  |
| 43 | A | 4     | 0.00696  |
| 43 | F | 3     | 0.00522  |
| 43 | N | 2     | 0.00348  |
| 44 | Q | 54674 | 95.02242 |
| 44 | R | 931   | 1.61806  |
| 44 | E | 787   | 1.36779  |
| 44 | L | 478   | 0.83076  |
| 44 | K | 211   | 0.36671  |
| 44 | H | 207   | 0.35976  |
| 44 | P | 39    | 0.06778  |
| 44 | V | 37    | 0.06431  |
| 44 | G | 32    | 0.05562  |
| 44 | D | 29    | 0.0504   |
| 44 | A | 28    | 0.04866  |
| 44 | T | 24    | 0.04171  |
| 44 | S | 22    | 0.03824  |
| 44 | M | 16    | 0.02781  |
| 44 | F | 12    | 0.02086  |
| 44 | W | 10    | 0.01738  |
| 44 | C | 1     | 0.00174  |
| 45 | A | 39290 | 68.1976  |
| 45 | V | 5084  | 8.82455  |
| 45 | I | 3279  | 5.69152  |
| 45 | T | 2946  | 5.11352  |
| 45 | G | 1965  | 3.41075  |
| 45 | S | 1714  | 2.97507  |
| 45 | P | 1434  | 2.48906  |
| 45 | R | 650   | 1.12824  |
| 45 | D | 321   | 0.55718  |
| 45 | F | 214   | 0.37145  |
| 45 | Y | 181   | 0.31417  |

|    |   |       |          |
|----|---|-------|----------|
| 45 | L | 156   | 0.27078  |
| 45 | N | 147   | 0.25516  |
| 45 | H | 88    | 0.15275  |
| 45 | E | 84    | 0.1458   |
| 45 | K | 29    | 0.05034  |
| 45 | Q | 25    | 0.04339  |
| 45 | M | 3     | 0.00521  |
| 45 | C | 2     | 0.00347  |
| 46 | P | 52697 | 91.31188 |
| 46 | A | 1607  | 2.78456  |
| 46 | S | 988   | 1.71198  |
| 46 | L | 435   | 0.75376  |
| 46 | T | 433   | 0.75029  |
| 46 | E | 408   | 0.70697  |
| 46 | I | 273   | 0.47305  |
| 46 | Q | 261   | 0.45225  |
| 46 | V | 208   | 0.36042  |
| 46 | H | 132   | 0.22873  |
| 46 | D | 121   | 0.20967  |
| 46 | R | 78    | 0.13516  |
| 46 | G | 27    | 0.04678  |
| 46 | K | 20    | 0.03466  |
| 46 | F | 9     | 0.01559  |
| 46 | Y | 7     | 0.01213  |
| 46 | C | 3     | 0.0052   |
| 46 | N | 3     | 0.0052   |
| 46 | M | 1     | 0.00173  |
| 47 | G | 52881 | 91.48804 |
| 47 | D | 3296  | 5.70232  |
| 47 | E | 913   | 1.57956  |
| 47 | R | 231   | 0.39965  |
| 47 | A | 125   | 0.21626  |
| 47 | K | 71    | 0.12284  |
| 47 | V | 45    | 0.07785  |
| 47 | W | 40    | 0.0692   |
| 47 | N | 37    | 0.06401  |
| 47 | Q | 36    | 0.06228  |
| 47 | S | 36    | 0.06228  |
| 47 | T | 33    | 0.05709  |
| 47 | P | 19    | 0.03287  |
| 47 | M | 18    | 0.03114  |
| 47 | L | 13    | 0.02249  |
| 47 | Y | 4     | 0.00692  |
| 47 | C | 3     | 0.00519  |
| 48 | K | 45927 | 79.36236 |
| 48 | N | 4517  | 7.80543  |

|    |   |       |         |
|----|---|-------|---------|
| 48 | R | 1716  | 2.96527 |
| 48 | Q | 1656  | 2.86159 |
| 48 | E | 1386  | 2.39502 |
| 48 | S | 448   | 0.77415 |
| 48 | T | 320   | 0.55296 |
| 48 | D | 309   | 0.53396 |
| 48 | G | 299   | 0.51668 |
| 48 | M | 296   | 0.51149 |
| 48 | A | 272   | 0.47002 |
| 48 | H | 176   | 0.30413 |
| 48 | I | 168   | 0.29031 |
| 48 | L | 138   | 0.23847 |
| 48 | F | 101   | 0.17453 |
| 48 | V | 51    | 0.08813 |
| 48 | P | 42    | 0.07258 |
| 48 | Y | 32    | 0.0553  |
| 48 | W | 16    | 0.02765 |
| 49 | E | 47496 | 81.9066 |
| 49 | Q | 2507  | 4.32331 |
| 49 | A | 2113  | 3.64386 |
| 49 | G | 1839  | 3.17135 |
| 49 | K | 1315  | 2.26771 |
| 49 | D | 1223  | 2.10906 |
| 49 | R | 399   | 0.68807 |
| 49 | S | 248   | 0.42767 |
| 49 | V | 238   | 0.41043 |
| 49 | P | 153   | 0.26385 |
| 49 | T | 133   | 0.22936 |
| 49 | N | 82    | 0.14141 |
| 49 | L | 75    | 0.12934 |
| 49 | M | 62    | 0.10692 |
| 49 | Y | 49    | 0.0845  |
| 49 | H | 27    | 0.04656 |
| 49 | F | 19    | 0.03277 |
| 49 | W | 9     | 0.01552 |
| 49 | I | 1     | 0.00172 |
| 50 | R | 51320 | 88.3548 |
| 50 | C | 5136  | 8.84237 |
| 50 | L | 464   | 0.79884 |
| 50 | H | 352   | 0.60602 |
| 50 | P | 257   | 0.44246 |
| 50 | G | 77    | 0.13257 |
| 50 | S | 77    | 0.13257 |
| 50 | N | 65    | 0.11191 |
| 50 | Q | 55    | 0.09469 |
| 50 | V | 48    | 0.08264 |

|    |   |       |          |
|----|---|-------|----------|
| 50 | Y | 36    | 0.06198  |
| 50 | K | 35    | 0.06026  |
| 50 | T | 33    | 0.05681  |
| 50 | I | 31    | 0.05337  |
| 50 | F | 29    | 0.04993  |
| 50 | A | 26    | 0.04476  |
| 50 | D | 25    | 0.04304  |
| 50 | E | 12    | 0.02066  |
| 50 | W | 5     | 0.00861  |
| 50 | M | 1     | 0.00172  |
| 51 | E | 55899 | 96.06455 |
| 51 | K | 566   | 0.97269  |
| 51 | D | 464   | 0.7974   |
| 51 | V | 341   | 0.58602  |
| 51 | G | 295   | 0.50697  |
| 51 | Q | 255   | 0.43823  |
| 51 | A | 126   | 0.21654  |
| 51 | T | 89    | 0.15295  |
| 51 | L | 45    | 0.07733  |
| 51 | R | 38    | 0.0653   |
| 51 | I | 21    | 0.03609  |
| 51 | M | 17    | 0.02922  |
| 51 | N | 15    | 0.02578  |
| 51 | S | 9     | 0.01547  |
| 51 | W | 4     | 0.00687  |
| 51 | H | 3     | 0.00516  |
| 51 | P | 2     | 0.00344  |
| 52 | G | 38244 | 65.66283 |
| 52 | L | 5558  | 9.54278  |
| 52 | A | 4601  | 7.89966  |
| 52 | W | 2590  | 4.44689  |
| 52 | E | 1573  | 2.70075  |
| 52 | R | 1334  | 2.2904   |
| 52 | V | 1117  | 1.91783  |
| 52 | P | 744   | 1.27741  |
| 52 | F | 725   | 1.24478  |
| 52 | M | 486   | 0.83444  |
| 52 | K | 373   | 0.64042  |
| 52 | Q | 280   | 0.48074  |
| 52 | S | 257   | 0.44125  |
| 52 | T | 112   | 0.1923   |
| 52 | D | 102   | 0.17513  |
| 52 | I | 67    | 0.11504  |
| 52 | Y | 28    | 0.04807  |
| 52 | H | 26    | 0.04464  |
| 52 | C | 13    | 0.02232  |



|    |   |       |          |
|----|---|-------|----------|
| 52 | N | 13    | 0.02232  |
| 53 | V | 51457 | 88.24579 |
| 53 | I | 4777  | 8.19228  |
| 53 | L | 1507  | 2.58442  |
| 53 | A | 273   | 0.46818  |
| 53 | F | 98    | 0.16806  |
| 53 | D | 89    | 0.15263  |
| 53 | G | 41    | 0.07031  |
| 53 | T | 20    | 0.0343   |
| 53 | C | 14    | 0.02401  |
| 53 | E | 8     | 0.01372  |
| 53 | N | 7     | 0.012    |
| 53 | S | 7     | 0.012    |
| 53 | M | 6     | 0.01029  |
| 53 | P | 4     | 0.00686  |
| 53 | H | 2     | 0.00343  |
| 53 | Y | 1     | 0.00171  |
| 54 | A | 49192 | 84.27184 |
| 54 | S | 7248  | 12.4167  |
| 54 | G | 770   | 1.3191   |
| 54 | V | 689   | 1.18034  |
| 54 | T | 313   | 0.53621  |
| 54 | L | 42    | 0.07195  |
| 54 | P | 37    | 0.06339  |
| 54 | E | 22    | 0.03769  |
| 54 | I | 20    | 0.03426  |
| 54 | C | 13    | 0.02227  |
| 54 | W | 9     | 0.01542  |
| 54 | Y | 5     | 0.00857  |
| 54 | D | 4     | 0.00685  |
| 54 | M | 3     | 0.00514  |
| 54 | F | 2     | 0.00343  |
| 54 | Q | 2     | 0.00343  |
| 54 | R | 2     | 0.00343  |
| 55 | A | 17760 | 30.38442 |
| 55 | S | 10312 | 17.64213 |
| 55 | T | 8867  | 15.16997 |
| 55 | G | 7038  | 12.04085 |
| 55 | V | 4803  | 8.21714  |
| 55 | R | 1877  | 3.21124  |
| 55 | I | 1480  | 2.53204  |
| 55 | L | 1386  | 2.37122  |
| 55 | H | 1029  | 1.76045  |
| 55 | F | 927   | 1.58594  |
| 55 | N | 517   | 0.8845   |
| 55 | Y | 508   | 0.8691   |

|    |   |       |          |
|----|---|-------|----------|
| 55 | D | 437   | 0.74763  |
| 55 | C | 351   | 0.6005   |
| 55 | M | 343   | 0.58682  |
| 55 | Q | 324   | 0.55431  |
| 55 | E | 200   | 0.34217  |
| 55 | K | 148   | 0.2532   |
| 55 | W | 102   | 0.17451  |
| 55 | P | 42    | 0.07186  |
| 56 | I | 44960 | 76.83631 |
| 56 | L | 4483  | 7.66141  |
| 56 | V | 3354  | 5.73196  |
| 56 | F | 1604  | 2.74122  |
| 56 | M | 1347  | 2.30201  |
| 56 | T | 1003  | 1.71412  |
| 56 | S | 421   | 0.71949  |
| 56 | A | 328   | 0.56055  |
| 56 | R | 286   | 0.48877  |
| 56 | H | 123   | 0.21021  |
| 56 | Y | 114   | 0.19483  |
| 56 | K | 102   | 0.17432  |
| 56 | N | 88    | 0.15039  |
| 56 | D | 77    | 0.13159  |
| 56 | W | 53    | 0.09058  |
| 56 | G | 39    | 0.06665  |
| 56 | Q | 37    | 0.06323  |
| 56 | C | 36    | 0.06152  |
| 56 | E | 31    | 0.05298  |
| 56 | P | 28    | 0.04785  |
| 57 | D | 19897 | 33.9777  |
| 57 | Y | 10800 | 18.44294 |
| 57 | S | 6236  | 10.64909 |
| 57 | E | 4104  | 7.00832  |
| 57 | G | 2576  | 4.39898  |
| 57 | N | 2256  | 3.85252  |
| 57 | R | 2240  | 3.8252   |
| 57 | T | 1868  | 3.18995  |
| 57 | A | 1831  | 3.12676  |
| 57 | F | 1345  | 2.29683  |
| 57 | H | 1236  | 2.11069  |
| 57 | V | 888   | 1.51642  |
| 57 | W | 888   | 1.51642  |
| 57 | L | 748   | 1.27734  |
| 57 | C | 422   | 0.72064  |
| 57 | K | 391   | 0.6677   |
| 57 | I | 379   | 0.64721  |
| 57 | Q | 277   | 0.47303  |

|    |   |       |          |
|----|---|-------|----------|
| 57 | M | 98    | 0.16735  |
| 57 | P | 79    | 0.13491  |
| 58 | S | 21781 | 37.14422 |
| 58 | T | 12765 | 21.76879 |
| 58 | R | 4847  | 8.26583  |
| 58 | G | 3750  | 6.39506  |
| 58 | A | 2447  | 4.17299  |
| 58 | N | 2389  | 4.07408  |
| 58 | I | 2010  | 3.42775  |
| 58 | P | 1802  | 3.07304  |
| 58 | V | 1314  | 2.24083  |
| 58 | D | 1180  | 2.01231  |
| 58 | L | 874   | 1.49048  |
| 58 | F | 756   | 1.28924  |
| 58 | K | 700   | 1.19374  |
| 58 | H | 517   | 0.88167  |
| 58 | M | 418   | 0.71284  |
| 58 | Y | 351   | 0.59858  |
| 58 | E | 278   | 0.47409  |
| 58 | W | 235   | 0.40076  |
| 58 | Q | 170   | 0.28991  |
| 58 | C | 55    | 0.09379  |
| 59 | D | 30620 | 52.13246 |
| 59 | G | 11600 | 19.74972 |
| 59 | A | 2266  | 3.85801  |
| 59 | R | 2244  | 3.82055  |
| 59 | S | 2098  | 3.57198  |
| 59 | N | 1819  | 3.09696  |
| 59 | V | 1420  | 2.41764  |
| 59 | E | 1330  | 2.26441  |
| 59 | Y | 1102  | 1.87622  |
| 59 | T | 1056  | 1.79791  |
| 59 | I | 827   | 1.40802  |
| 59 | H | 520   | 0.88533  |
| 59 | P | 449   | 0.76445  |
| 59 | L | 401   | 0.68273  |
| 59 | F | 348   | 0.59249  |
| 59 | Q | 246   | 0.41883  |
| 59 | K | 216   | 0.36775  |
| 59 | M | 78    | 0.1328   |
| 59 | C | 61    | 0.10386  |
| 59 | W | 34    | 0.05789  |
| 60 | G | 45385 | 77.13946 |
| 60 | D | 4532  | 7.7029   |
| 60 | S | 2157  | 3.66619  |
| 60 | A | 1140  | 1.93762  |

|    |   |       |          |
|----|---|-------|----------|
| 60 | R | 1076  | 1.82884  |
| 60 | T | 1020  | 1.73366  |
| 60 | N | 962   | 1.63508  |
| 60 | E | 529   | 0.89912  |
| 60 | H | 465   | 0.79035  |
| 60 | V | 365   | 0.62038  |
| 60 | L | 302   | 0.5133   |
| 60 | I | 228   | 0.38752  |
| 60 | P | 189   | 0.32124  |
| 60 | Y | 184   | 0.31274  |
| 60 | F | 138   | 0.23455  |
| 60 | K | 67    | 0.11388  |
| 60 | M | 48    | 0.08158  |
| 60 | Q | 23    | 0.03909  |
| 60 | C | 18    | 0.03059  |
| 60 | W | 7     | 0.0119   |
| 61 | S | 15881 | 26.9535  |
| 61 | G | 12978 | 22.02648 |
| 61 | T | 8040  | 13.64562 |
| 61 | R | 4757  | 8.07366  |
| 61 | D | 3676  | 6.23897  |
| 61 | N | 2500  | 4.24304  |
| 61 | A | 2142  | 3.63544  |
| 61 | V | 1702  | 2.88866  |
| 61 | I | 1617  | 2.7444   |
| 61 | K | 1218  | 2.06721  |
| 61 | L | 966   | 1.63951  |
| 61 | E | 787   | 1.33571  |
| 61 | H | 689   | 1.16938  |
| 61 | P | 597   | 1.01324  |
| 61 | Y | 417   | 0.70774  |
| 61 | M | 328   | 0.55669  |
| 61 | F | 292   | 0.49559  |
| 61 | Q | 234   | 0.39715  |
| 61 | W | 70    | 0.11881  |
| 61 | C | 29    | 0.04922  |
| 62 | T | 30906 | 52.37329 |
| 62 | S | 7458  | 12.63832 |
| 62 | A | 4071  | 6.89871  |
| 62 | I | 3357  | 5.68877  |
| 62 | R | 2273  | 3.85182  |
| 62 | P | 1650  | 2.79609  |
| 62 | G | 1631  | 2.76389  |
| 62 | N | 1527  | 2.58765  |
| 62 | E | 1167  | 1.9776   |
| 62 | V | 1033  | 1.75052  |

|    |    |       |          |
|----|----|-------|----------|
| 62 | D  | 994   | 1.68443  |
| 62 | K  | 881   | 1.49294  |
| 62 | L  | 563   | 0.95406  |
| 62 | M  | 340   | 0.57616  |
| 62 | Y  | 312   | 0.52871  |
| 62 | Q  | 279   | 0.47279  |
| 62 | H  | 267   | 0.45246  |
| 62 | F  | 246   | 0.41687  |
| 62 | W  | 40    | 0.06778  |
| 62 | C  | 16    | 0.02711  |
| 63 | T  | 14435 | 71.6555  |
| 63 | A  | 1340  | 6.65177  |
| 63 | P  | 1223  | 6.07099  |
| 63 | I  | 792   | 3.9315   |
| 63 | S  | 662   | 3.28618  |
| 63 | K  | 295   | 1.46438  |
| 63 | R  | 287   | 1.42467  |
| 63 | V  | 255   | 1.26582  |
| 63 | Q  | 187   | 0.92827  |
| 63 | L  | 181   | 0.89849  |
| 63 | E  | 153   | 0.75949  |
| 63 | Y  | 79    | 0.39216  |
| 63 | F  | 56    | 0.27798  |
| 63 | G  | 55    | 0.27302  |
| 63 | D  | 46    | 0.22834  |
| 63 | M  | 45    | 0.22338  |
| 63 | N  | 33    | 0.16381  |
| 63 | H  | 20    | 0.09928  |
| 63 | W  | 1     | 0.00496  |
| 63 | NA | 0     | 0        |
| 64 | NA | 0     | 0        |
| 65 | NA | 0     | 0        |
| 66 | Y  | 16603 | 28.08308 |
| 66 | S  | 11669 | 19.73749 |
| 66 | T  | 7238  | 12.24269 |
| 66 | N  | 3405  | 5.75937  |
| 66 | R  | 2628  | 4.44512  |
| 66 | K  | 2385  | 4.0341   |
| 66 | F  | 2360  | 3.99181  |
| 66 | D  | 2089  | 3.53343  |
| 66 | A  | 1922  | 3.25096  |
| 66 | H  | 1646  | 2.78412  |
| 66 | V  | 1539  | 2.60314  |
| 66 | I  | 1195  | 2.02128  |
| 66 | W  | 1083  | 1.83184  |
| 66 | G  | 807   | 1.365    |

|    |   |       |          |
|----|---|-------|----------|
| 66 | L | 732   | 1.23814  |
| 66 | E | 703   | 1.18909  |
| 66 | M | 627   | 1.06054  |
| 66 | Q | 314   | 0.53111  |
| 66 | C | 159   | 0.26894  |
| 66 | P | 17    | 0.02875  |
| 67 | Y | 55645 | 93.6753  |
| 67 | V | 1128  | 1.89893  |
| 67 | H | 469   | 0.78954  |
| 67 | F | 447   | 0.7525   |
| 67 | L | 411   | 0.6919   |
| 67 | I | 332   | 0.5589   |
| 67 | T | 288   | 0.48483  |
| 67 | S | 203   | 0.34174  |
| 67 | C | 195   | 0.32827  |
| 67 | N | 77    | 0.12963  |
| 67 | D | 58    | 0.09764  |
| 67 | A | 45    | 0.07576  |
| 67 | R | 43    | 0.07239  |
| 67 | G | 17    | 0.02862  |
| 67 | P | 12    | 0.0202   |
| 67 | Q | 11    | 0.01852  |
| 67 | M | 10    | 0.01683  |
| 67 | E | 8     | 0.01347  |
| 67 | W | 3     | 0.00505  |
| 68 | A | 42080 | 70.41735 |
| 68 | T | 4205  | 7.03671  |
| 68 | S | 3279  | 5.48713  |
| 68 | V | 2196  | 3.67482  |
| 68 | G | 2132  | 3.56772  |
| 68 | D | 1308  | 2.18883  |
| 68 | L | 804   | 1.34543  |
| 68 | I | 731   | 1.22327  |
| 68 | R | 686   | 1.14796  |
| 68 | E | 671   | 1.12286  |
| 68 | P | 646   | 1.08103  |
| 68 | K | 372   | 0.62251  |
| 68 | H | 292   | 0.48864  |
| 68 | N | 131   | 0.21922  |
| 68 | Q | 108   | 0.18073  |
| 68 | F | 42    | 0.07028  |
| 68 | M | 38    | 0.06359  |
| 68 | Y | 30    | 0.0502   |
| 68 | C | 4     | 0.00669  |
| 68 | W | 3     | 0.00502  |
| 69 | D | 50751 | 84.47799 |

|    |   |       |          |
|----|---|-------|----------|
| 69 | E | 2893  | 4.81557  |
| 69 | N | 1605  | 2.67162  |
| 69 | A | 1347  | 2.24216  |
| 69 | G | 1188  | 1.9775   |
| 69 | S | 436   | 0.72575  |
| 69 | P | 400   | 0.66582  |
| 69 | H | 310   | 0.51601  |
| 69 | V | 303   | 0.50436  |
| 69 | K | 190   | 0.31627  |
| 69 | T | 182   | 0.30295  |
| 69 | R | 152   | 0.25301  |
| 69 | Q | 140   | 0.23304  |
| 69 | Y | 99    | 0.16479  |
| 69 | L | 36    | 0.05992  |
| 69 | I | 18    | 0.02996  |
| 69 | F | 10    | 0.01665  |
| 69 | M | 10    | 0.01665  |
| 69 | C | 4     | 0.00666  |
| 69 | W | 2     | 0.00333  |
| 70 | S | 53790 | 87.89216 |
| 70 | A | 3206  | 5.23856  |
| 70 | F | 1431  | 2.33824  |
| 70 | P | 1096  | 1.79085  |
| 70 | T | 588   | 0.96078  |
| 70 | D | 279   | 0.45588  |
| 70 | Y | 191   | 0.31209  |
| 70 | V | 110   | 0.17974  |
| 70 | L | 109   | 0.1781   |
| 70 | N | 107   | 0.17484  |
| 70 | W | 79    | 0.12908  |
| 70 | I | 61    | 0.09967  |
| 70 | G | 45    | 0.07353  |
| 70 | H | 41    | 0.06699  |
| 70 | R | 37    | 0.06046  |
| 70 | Q | 9     | 0.01471  |
| 70 | C | 7     | 0.01144  |
| 70 | M | 6     | 0.0098   |
| 70 | K | 5     | 0.00817  |
| 70 | E | 3     | 0.0049   |
| 71 | V | 58186 | 93.85747 |
| 71 | A | 2020  | 3.25838  |
| 71 | M | 526   | 0.84847  |
| 71 | L | 488   | 0.78717  |
| 71 | I | 295   | 0.47585  |
| 71 | T | 192   | 0.30971  |
| 71 | E | 129   | 0.20808  |

|    |    |       |          |
|----|----|-------|----------|
| 71 | F  | 47    | 0.07581  |
| 71 | G  | 43    | 0.06936  |
| 71 | S  | 19    | 0.03065  |
| 71 | W  | 12    | 0.01936  |
| 71 | N  | 11    | 0.01774  |
| 71 | P  | 9     | 0.01452  |
| 71 | K  | 6     | 0.00968  |
| 71 | D  | 5     | 0.00807  |
| 71 | Q  | 4     | 0.00645  |
| 71 | C  | 1     | 0.00161  |
| 71 | R  | 1     | 0.00161  |
| 72 | K  | 55207 | 88.73441 |
| 72 | E  | 1863  | 2.99441  |
| 72 | R  | 1713  | 2.75331  |
| 72 | Q  | 1574  | 2.5299   |
| 72 | N  | 485   | 0.77954  |
| 72 | T  | 438   | 0.704    |
| 72 | A  | 263   | 0.42272  |
| 72 | M  | 256   | 0.41147  |
| 72 | S  | 167   | 0.26842  |
| 72 | L  | 92    | 0.14787  |
| 72 | V  | 54    | 0.08679  |
| 72 | G  | 34    | 0.05465  |
| 72 | I  | 23    | 0.03697  |
| 72 | D  | 22    | 0.03536  |
| 72 | H  | 8     | 0.01286  |
| 72 | Y  | 6     | 0.00964  |
| 72 | P  | 5     | 0.00804  |
| 72 | F  | 3     | 0.00482  |
| 72 | W  | 2     | 0.00321  |
| 72 | C  | 1     | 0.00161  |
| 73 | NA | 0     | 0        |
| 74 | G  | 60075 | 95.8134  |
| 74 | D  | 2009  | 3.20415  |
| 74 | A  | 194   | 0.30941  |
| 74 | S  | 169   | 0.26954  |
| 74 | E  | 89    | 0.14195  |
| 74 | V  | 64    | 0.10207  |
| 74 | R  | 34    | 0.05423  |
| 74 | C  | 24    | 0.03828  |
| 74 | N  | 15    | 0.02392  |
| 74 | L  | 8     | 0.01276  |
| 74 | T  | 8     | 0.01276  |
| 74 | H  | 3     | 0.00478  |
| 74 | F  | 2     | 0.00319  |
| 74 | K  | 2     | 0.00319  |



|    |   |       |          |
|----|---|-------|----------|
| 74 | I | 1     | 0.00159  |
| 74 | P | 1     | 0.00159  |
| 74 | W | 1     | 0.00159  |
| 74 | Y | 1     | 0.00159  |
| 75 | R | 62643 | 99.5835  |
| 75 | Q | 150   | 0.23845  |
| 75 | L | 56    | 0.08902  |
| 75 | P | 15    | 0.02385  |
| 75 | H | 11    | 0.01749  |
| 75 | W | 9     | 0.01431  |
| 75 | C | 8     | 0.01272  |
| 75 | G | 5     | 0.00795  |
| 75 | S | 4     | 0.00636  |
| 75 | A | 2     | 0.00318  |
| 75 | E | 1     | 0.00159  |
| 75 | T | 1     | 0.00159  |
| 76 | F | 61514 | 97.62577 |
| 76 | L | 399   | 0.63323  |
| 76 | V | 325   | 0.51579  |
| 76 | S | 321   | 0.50944  |
| 76 | Y | 147   | 0.2333   |
| 76 | A | 111   | 0.17616  |
| 76 | I | 107   | 0.16981  |
| 76 | C | 33    | 0.05237  |
| 76 | T | 18    | 0.02857  |
| 76 | G | 17    | 0.02698  |
| 76 | W | 11    | 0.01746  |
| 76 | H | 5     | 0.00794  |
| 76 | D | 1     | 0.00159  |
| 76 | R | 1     | 0.00159  |
| 77 | T | 56361 | 89.29607 |
| 77 | A | 2456  | 3.89119  |
| 77 | I | 1657  | 2.62528  |
| 77 | S | 1502  | 2.37971  |
| 77 | N | 398   | 0.63057  |
| 77 | V | 218   | 0.34539  |
| 77 | F | 161   | 0.25508  |
| 77 | R | 84    | 0.13309  |
| 77 | L | 63    | 0.09981  |
| 77 | D | 60    | 0.09506  |
| 77 | K | 49    | 0.07763  |
| 77 | P | 35    | 0.05545  |
| 77 | M | 24    | 0.03802  |
| 77 | G | 18    | 0.02852  |
| 77 | H | 18    | 0.02852  |
| 77 | E | 6     | 0.00951  |

|    |   |       |          |
|----|---|-------|----------|
| 77 | C | 2     | 0.00317  |
| 77 | W | 2     | 0.00317  |
| 77 | Y | 2     | 0.00317  |
| 77 | Q | 1     | 0.00158  |
| 78 | I | 54529 | 86.28143 |
| 78 | V | 5351  | 8.46691  |
| 78 | L | 1114  | 1.76269  |
| 78 | T | 570   | 0.90191  |
| 78 | A | 556   | 0.87976  |
| 78 | M | 479   | 0.75792  |
| 78 | F | 353   | 0.55855  |
| 78 | S | 70    | 0.11076  |
| 78 | N | 61    | 0.09652  |
| 78 | G | 44    | 0.06962  |
| 78 | C | 27    | 0.04272  |
| 78 | D | 15    | 0.02373  |
| 78 | Y | 14    | 0.02215  |
| 78 | P | 6     | 0.00949  |
| 78 | Q | 5     | 0.00791  |
| 78 | R | 2     | 0.00316  |
| 78 | E | 1     | 0.00158  |
| 78 | H | 1     | 0.00158  |
| 78 | W | 1     | 0.00158  |
| 79 | S | 60666 | 95.83432 |
| 79 | T | 905   | 1.42963  |
| 79 | A | 600   | 0.94782  |
| 79 | P | 339   | 0.53552  |
| 79 | F | 302   | 0.47707  |
| 79 | Y | 156   | 0.24643  |
| 79 | D | 97    | 0.15323  |
| 79 | V | 53    | 0.08372  |
| 79 | I | 35    | 0.05529  |
| 79 | L | 30    | 0.04739  |
| 79 | R | 30    | 0.04739  |
| 79 | G | 24    | 0.03791  |
| 79 | N | 23    | 0.03633  |
| 79 | H | 16    | 0.02528  |
| 79 | W | 10    | 0.0158   |
| 79 | C | 7     | 0.01106  |
| 79 | E | 5     | 0.0079   |
| 79 | Q | 5     | 0.0079   |
| 80 | Q | 25549 | 40.33055 |
| 80 | R | 15381 | 24.27978 |
| 80 | K | 10841 | 17.11314 |
| 80 | H | 4153  | 6.55575  |
| 80 | L | 2998  | 4.73251  |

|    |   |       |          |
|----|---|-------|----------|
| 80 | E | 1371  | 2.1642   |
| 80 | V | 624   | 0.98502  |
| 80 | Y | 424   | 0.66931  |
| 80 | A | 331   | 0.5225   |
| 80 | T | 307   | 0.48462  |
| 80 | I | 274   | 0.43252  |
| 80 | S | 260   | 0.41042  |
| 80 | P | 196   | 0.3094   |
| 80 | G | 167   | 0.26362  |
| 80 | M | 117   | 0.18469  |
| 80 | F | 109   | 0.17206  |
| 80 | W | 100   | 0.15786  |
| 80 | N | 95    | 0.14996  |
| 80 | D | 45    | 0.07104  |
| 80 | C | 7     | 0.01105  |
| 81 | D | 58271 | 91.91299 |
| 81 | G | 1477  | 2.32973  |
| 81 | N | 1432  | 2.25875  |
| 81 | E | 1044  | 1.64674  |
| 81 | A | 491   | 0.77447  |
| 81 | V | 235   | 0.37067  |
| 81 | H | 189   | 0.29812  |
| 81 | S | 125   | 0.19717  |
| 81 | I | 29    | 0.04574  |
| 81 | T | 28    | 0.04417  |
| 81 | Y | 23    | 0.03628  |
| 81 | L | 22    | 0.0347   |
| 81 | P | 18    | 0.02839  |
| 81 | R | 7     | 0.01104  |
| 81 | K | 3     | 0.00473  |
| 81 | Q | 3     | 0.00473  |
| 81 | F | 1     | 0.00158  |
| 82 | N | 38521 | 60.71558 |
| 82 | S | 6999  | 11.0316  |
| 82 | K | 4147  | 6.53637  |
| 82 | D | 3255  | 5.13043  |
| 82 | A | 2219  | 3.49752  |
| 82 | T | 1712  | 2.6984   |
| 82 | R | 1253  | 1.97494  |
| 82 | G | 1011  | 1.59351  |
| 82 | I | 993   | 1.56514  |
| 82 | H | 939   | 1.48002  |
| 82 | Y | 790   | 1.24517  |
| 82 | V | 717   | 1.13011  |
| 82 | M | 216   | 0.34045  |
| 82 | L | 196   | 0.30893  |

|    |   |       |          |
|----|---|-------|----------|
| 82 | E | 183   | 0.28844  |
| 82 | F | 122   | 0.19229  |
| 82 | P | 106   | 0.16707  |
| 82 | Q | 46    | 0.0725   |
| 82 | W | 14    | 0.02207  |
| 82 | C | 6     | 0.00946  |
| 83 | A | 48145 | 75.84159 |
| 83 | D | 3259  | 5.13382  |
| 83 | T | 3205  | 5.04875  |
| 83 | S | 3024  | 4.76363  |
| 83 | V | 1541  | 2.4275   |
| 83 | G | 1472  | 2.3188   |
| 83 | P | 545   | 0.85852  |
| 83 | R | 426   | 0.67107  |
| 83 | N | 422   | 0.66477  |
| 83 | E | 374   | 0.58915  |
| 83 | L | 356   | 0.5608   |
| 83 | I | 287   | 0.4521   |
| 83 | H | 105   | 0.1654   |
| 83 | F | 92    | 0.14493  |
| 83 | Y | 88    | 0.13862  |
| 83 | K | 60    | 0.09452  |
| 83 | M | 51    | 0.08034  |
| 83 | Q | 24    | 0.03781  |
| 83 | W | 4     | 0.0063   |
| 83 | C | 1     | 0.00158  |
| 84 | K | 50497 | 79.50155 |
| 84 | E | 2947  | 4.6397   |
| 84 | N | 2709  | 4.265    |
| 84 | R | 2056  | 3.23693  |
| 84 | Q | 1078  | 1.69718  |
| 84 | T | 965   | 1.51928  |
| 84 | A | 877   | 1.38073  |
| 84 | G | 546   | 0.85961  |
| 84 | D | 431   | 0.67856  |
| 84 | S | 398   | 0.6266   |
| 84 | V | 296   | 0.46602  |
| 84 | M | 214   | 0.33692  |
| 84 | L | 178   | 0.28024  |
| 84 | W | 139   | 0.21884  |
| 84 | P | 98    | 0.15429  |
| 84 | H | 33    | 0.05195  |
| 84 | I | 27    | 0.04251  |
| 84 | Y | 25    | 0.03936  |
| 84 | F | 3     | 0.00472  |
| 85 | N | 46604 | 73.35516 |

|    |   |       |          |
|----|---|-------|----------|
| 85 | K | 3387  | 5.33117  |
| 85 | D | 3327  | 5.23673  |
| 85 | S | 2490  | 3.91928  |
| 85 | T | 2145  | 3.37625  |
| 85 | R | 1543  | 2.4287   |
| 85 | H | 942   | 1.48272  |
| 85 | G | 677   | 1.0656   |
| 85 | A | 646   | 1.01681  |
| 85 | Y | 355   | 0.55877  |
| 85 | I | 265   | 0.41711  |
| 85 | E | 248   | 0.39035  |
| 85 | M | 220   | 0.34628  |
| 85 | P | 201   | 0.31638  |
| 85 | Q | 188   | 0.29591  |
| 85 | V | 124   | 0.19518  |
| 85 | L | 96    | 0.1511   |
| 85 | F | 71    | 0.11175  |
| 85 | C | 2     | 0.00315  |
| 85 | W | 1     | 0.00157  |
| 86 | T | 49179 | 77.38875 |
| 86 | I | 5435  | 8.55259  |
| 86 | S | 3380  | 5.31881  |
| 86 | M | 1772  | 2.78844  |
| 86 | A | 1703  | 2.67986  |
| 86 | V | 514   | 0.80884  |
| 86 | N | 369   | 0.58066  |
| 86 | R | 258   | 0.40599  |
| 86 | E | 210   | 0.33046  |
| 86 | K | 201   | 0.3163   |
| 86 | L | 186   | 0.29269  |
| 86 | F | 92    | 0.14477  |
| 86 | P | 75    | 0.11802  |
| 86 | Q | 68    | 0.10701  |
| 86 | W | 48    | 0.07553  |
| 86 | G | 23    | 0.03619  |
| 86 | D | 21    | 0.03305  |
| 86 | H | 8     | 0.01259  |
| 86 | Y | 6     | 0.00944  |
| 87 | L | 35847 | 56.404   |
| 87 | V | 19243 | 30.27819 |
| 87 | I | 2709  | 4.26252  |
| 87 | M | 2157  | 3.39396  |
| 87 | A | 1265  | 1.99043  |
| 87 | W | 667   | 1.0495   |
| 87 | T | 489   | 0.76942  |
| 87 | F | 430   | 0.67659  |

|    |   |       |          |
|----|---|-------|----------|
| 87 | P | 167   | 0.26277  |
| 87 | Q | 134   | 0.21084  |
| 87 | G | 103   | 0.16207  |
| 87 | H | 96    | 0.15105  |
| 87 | S | 90    | 0.14161  |
| 87 | R | 79    | 0.1243   |
| 87 | E | 31    | 0.04878  |
| 87 | N | 17    | 0.02675  |
| 87 | Y | 17    | 0.02675  |
| 87 | C | 5     | 0.00787  |
| 87 | K | 5     | 0.00787  |
| 87 | D | 3     | 0.00472  |
| 88 | Y | 49821 | 78.38297 |
| 88 | D | 3313  | 5.21232  |
| 88 | F | 3197  | 5.02981  |
| 88 | S | 1949  | 3.06635  |
| 88 | H | 1525  | 2.39927  |
| 88 | T | 1205  | 1.89582  |
| 88 | N | 675   | 1.06197  |
| 88 | W | 485   | 0.76305  |
| 88 | I | 356   | 0.56009  |
| 88 | A | 301   | 0.47356  |
| 88 | L | 211   | 0.33196  |
| 88 | V | 180   | 0.28319  |
| 88 | C | 138   | 0.21711  |
| 88 | E | 53    | 0.08338  |
| 88 | R | 50    | 0.07866  |
| 88 | Q | 28    | 0.04405  |
| 88 | G | 24    | 0.03776  |
| 88 | K | 24    | 0.03776  |
| 88 | M | 15    | 0.0236   |
| 88 | P | 11    | 0.01731  |
| 89 | L | 63056 | 99.18832 |
| 89 | P | 256   | 0.40269  |
| 89 | Q | 88    | 0.13843  |
| 89 | M | 74    | 0.1164   |
| 89 | F | 24    | 0.03775  |
| 89 | V | 18    | 0.02831  |
| 89 | S | 16    | 0.02517  |
| 89 | I | 14    | 0.02202  |
| 89 | R | 13    | 0.02045  |
| 89 | H | 12    | 0.01888  |
| 89 | G | 1     | 0.00157  |
| 90 | Q | 56197 | 88.40176 |
| 90 | E | 3378  | 5.31383  |
| 90 | R | 1286  | 2.02297  |

|    |   |       |          |
|----|---|-------|----------|
| 90 | H | 1160  | 1.82476  |
| 90 | D | 514   | 0.80856  |
| 90 | L | 324   | 0.50967  |
| 90 | T | 217   | 0.34136  |
| 90 | N | 133   | 0.20922  |
| 90 | K | 113   | 0.17776  |
| 90 | V | 61    | 0.09596  |
| 90 | S | 55    | 0.08652  |
| 90 | I | 39    | 0.06135  |
| 90 | A | 35    | 0.05506  |
| 90 | G | 19    | 0.02989  |
| 90 | Y | 15    | 0.0236   |
| 90 | P | 9     | 0.01416  |
| 90 | M | 7     | 0.01101  |
| 90 | F | 6     | 0.00944  |
| 90 | W | 2     | 0.00315  |
| 91 | M | 60048 | 94.45816 |
| 91 | L | 2235  | 3.51575  |
| 91 | I | 626   | 0.98473  |
| 91 | T | 311   | 0.48922  |
| 91 | V | 237   | 0.37281  |
| 91 | K | 53    | 0.08337  |
| 91 | A | 26    | 0.0409   |
| 91 | S | 12    | 0.01888  |
| 91 | R | 11    | 0.0173   |
| 91 | F | 3     | 0.00472  |
| 91 | N | 3     | 0.00472  |
| 91 | G | 2     | 0.00315  |
| 91 | P | 2     | 0.00315  |
| 91 | Q | 2     | 0.00315  |
| 92 | N | 46124 | 72.55167 |
| 92 | D | 8538  | 13.43002 |
| 92 | S | 3044  | 4.78812  |
| 92 | T | 2328  | 3.66187  |
| 92 | H | 1360  | 2.13924  |
| 92 | R | 364   | 0.57256  |
| 92 | K | 316   | 0.49706  |
| 92 | E | 280   | 0.44043  |
| 92 | V | 271   | 0.42627  |
| 92 | A | 236   | 0.37122  |
| 92 | I | 236   | 0.37122  |
| 92 | G | 211   | 0.3319   |
| 92 | Y | 154   | 0.24224  |
| 92 | L | 32    | 0.05034  |
| 92 | Q | 23    | 0.03618  |
| 92 | F | 22    | 0.03461  |

|    |   |       |          |
|----|---|-------|----------|
| 92 | M | 20    | 0.03146  |
| 92 | P | 8     | 0.01258  |
| 92 | C | 6     | 0.00944  |
| 92 | W | 1     | 0.00157  |
| 93 | S | 41293 | 64.9547  |
| 93 | N | 12267 | 19.29623 |
| 93 | D | 3373  | 5.3058   |
| 93 | G | 1752  | 2.75593  |
| 93 | T | 1254  | 1.97257  |
| 93 | R | 1111  | 1.74762  |
| 93 | A | 840   | 1.32134  |
| 93 | I | 310   | 0.48764  |
| 93 | V | 253   | 0.39797  |
| 93 | K | 241   | 0.3791   |
| 93 | M | 238   | 0.37438  |
| 93 | E | 186   | 0.29258  |
| 93 | L | 112   | 0.17618  |
| 93 | H | 95    | 0.14944  |
| 93 | Y | 86    | 0.13528  |
| 93 | Q | 60    | 0.09438  |
| 93 | C | 55    | 0.08652  |
| 93 | F | 24    | 0.03775  |
| 93 | W | 15    | 0.0236   |
| 93 | P | 7     | 0.01101  |
| 94 | L | 62059 | 97.61234 |
| 94 | V | 564   | 0.88711  |
| 94 | A | 270   | 0.42468  |
| 94 | P | 261   | 0.41053  |
| 94 | M | 217   | 0.34132  |
| 94 | Q | 102   | 0.16044  |
| 94 | I | 40    | 0.06292  |
| 94 | T | 24    | 0.03775  |
| 94 | R | 17    | 0.02674  |
| 94 | S | 12    | 0.01887  |
| 94 | F | 6     | 0.00944  |
| 94 | K | 3     | 0.00472  |
| 94 | E | 1     | 0.00157  |
| 94 | H | 1     | 0.00157  |
| 95 | K | 50064 | 78.74546 |
| 95 | R | 3379  | 5.31482  |
| 95 | T | 2431  | 3.82371  |
| 95 | E | 2330  | 3.66485  |
| 95 | Q | 2171  | 3.41476  |
| 95 | N | 1176  | 1.84973  |
| 95 | S | 541   | 0.85094  |
| 95 | A | 328   | 0.51591  |



|    |   |       |          |
|----|---|-------|----------|
| 95 | I | 305   | 0.47973  |
| 95 | L | 295   | 0.464    |
| 95 | V | 191   | 0.30042  |
| 95 | G | 125   | 0.19661  |
| 95 | D | 113   | 0.17774  |
| 95 | M | 80    | 0.12583  |
| 95 | H | 39    | 0.06134  |
| 95 | P | 5     | 0.00786  |
| 95 | C | 2     | 0.00315  |
| 95 | F | 1     | 0.00157  |
| 95 | W | 1     | 0.00157  |
| 96 | P | 52928 | 83.25023 |
| 96 | T | 3311  | 5.20786  |
| 96 | S | 2324  | 3.65541  |
| 96 | L | 1443  | 2.26969  |
| 96 | A | 1424  | 2.2398   |
| 96 | V | 905   | 1.42347  |
| 96 | I | 391   | 0.615    |
| 96 | F | 313   | 0.49232  |
| 96 | R | 202   | 0.31772  |
| 96 | D | 80    | 0.12583  |
| 96 | H | 79    | 0.12426  |
| 96 | E | 41    | 0.06449  |
| 96 | N | 38    | 0.05977  |
| 96 | Y | 31    | 0.04876  |
| 96 | G | 27    | 0.04247  |
| 96 | Q | 23    | 0.03618  |
| 96 | M | 15    | 0.02359  |
| 96 | K | 2     | 0.00315  |
| 97 | E | 54174 | 85.21006 |
| 97 | D | 7472  | 11.75268 |
| 97 | G | 684   | 1.07586  |
| 97 | A | 300   | 0.47187  |
| 97 | N | 199   | 0.31301  |
| 97 | V | 173   | 0.27211  |
| 97 | S | 164   | 0.25795  |
| 97 | Q | 143   | 0.22492  |
| 97 | K | 115   | 0.18088  |
| 97 | T | 95    | 0.14943  |
| 97 | L | 28    | 0.04404  |
| 97 | W | 10    | 0.01573  |
| 97 | R | 5     | 0.00786  |
| 97 | Y | 5     | 0.00786  |
| 97 | H | 3     | 0.00472  |
| 97 | M | 3     | 0.00472  |
| 97 | F | 2     | 0.00315  |

|     |   |       |          |
|-----|---|-------|----------|
| 97  | I | 1     | 0.00157  |
| 97  | P | 1     | 0.00157  |
| 98  | D | 63070 | 99.20254 |
| 98  | G | 220   | 0.34604  |
| 98  | E | 85    | 0.1337   |
| 98  | N | 80    | 0.12583  |
| 98  | V | 72    | 0.11325  |
| 98  | Y | 20    | 0.03146  |
| 98  | A | 17    | 0.02674  |
| 98  | H | 13    | 0.02045  |
| 99  | T | 57256 | 90.08748 |
| 99  | S | 5107  | 8.03543  |
| 99  | A | 837   | 1.31695  |
| 99  | G | 67    | 0.10542  |
| 99  | N | 66    | 0.10385  |
| 99  | I | 57    | 0.08968  |
| 99  | R | 48    | 0.07552  |
| 99  | Q | 42    | 0.06608  |
| 99  | M | 39    | 0.06136  |
| 99  | P | 18    | 0.02832  |
| 99  | D | 7     | 0.01101  |
| 99  | K | 6     | 0.00944  |
| 99  | V | 3     | 0.00472  |
| 99  | C | 2     | 0.00315  |
| 99  | L | 1     | 0.00157  |
| 100 | A | 55998 | 88.10813 |
| 100 | G | 6838  | 10.75902 |
| 100 | S | 366   | 0.57587  |
| 100 | D | 132   | 0.20769  |
| 100 | T | 106   | 0.16678  |
| 100 | V | 84    | 0.13217  |
| 100 | N | 11    | 0.01731  |
| 100 | P | 7     | 0.01101  |
| 100 | R | 5     | 0.00787  |
| 100 | E | 4     | 0.00629  |
| 100 | H | 4     | 0.00629  |
| 100 | C | 1     | 0.00157  |
| 101 | M | 40771 | 64.14973 |
| 101 | V | 11512 | 18.11316 |
| 101 | T | 3970  | 6.24646  |
| 101 | I | 2678  | 4.21361  |
| 101 | L | 1987  | 3.12638  |
| 101 | K | 1056  | 1.66153  |
| 101 | R | 598   | 0.9409   |
| 101 | A | 239   | 0.37605  |
| 101 | E | 207   | 0.3257   |

|     |   |       |          |
|-----|---|-------|----------|
| 101 | N | 121   | 0.19038  |
| 101 | D | 119   | 0.18724  |
| 101 | S | 119   | 0.18724  |
| 101 | Q | 90    | 0.14161  |
| 101 | H | 28    | 0.04406  |
| 101 | W | 18    | 0.02832  |
| 101 | F | 11    | 0.01731  |
| 101 | G | 11    | 0.01731  |
| 101 | P | 11    | 0.01731  |
| 101 | Y | 10    | 0.01573  |
| 102 | Y | 62940 | 99.03389 |
| 102 | C | 198   | 0.31155  |
| 102 | H | 196   | 0.3084   |
| 102 | F | 125   | 0.19668  |
| 102 | N | 65    | 0.10228  |
| 102 | S | 20    | 0.03147  |
| 102 | D | 4     | 0.00629  |
| 102 | W | 3     | 0.00472  |
| 102 | L | 2     | 0.00315  |
| 102 | R | 1     | 0.00157  |
| 103 | Y | 55892 | 88.1202  |
| 103 | F | 3227  | 5.08774  |
| 103 | S | 1308  | 2.06221  |
| 103 | H | 990   | 1.56085  |
| 103 | T | 482   | 0.75993  |
| 103 | V | 467   | 0.73628  |
| 103 | I | 334   | 0.52659  |
| 103 | L | 182   | 0.28694  |
| 103 | R | 177   | 0.27906  |
| 103 | C | 146   | 0.23019  |
| 103 | N | 89    | 0.14032  |
| 103 | Q | 58    | 0.09144  |
| 103 | W | 35    | 0.05518  |
| 103 | A | 12    | 0.01892  |
| 103 | E | 8     | 0.01261  |
| 103 | K | 8     | 0.01261  |
| 103 | D | 7     | 0.01104  |
| 103 | M | 3     | 0.00473  |
| 103 | P | 2     | 0.00315  |
| 104 | C | 63360 | 99.89752 |
| 104 | R | 37    | 0.05834  |
| 104 | Y | 12    | 0.01892  |
| 104 | G | 8     | 0.01261  |
| 104 | S | 7     | 0.01104  |
| 104 | A | 1     | 0.00158  |
| 105 | A | 7371  | 93.28018 |

|     |   |      |          |
|-----|---|------|----------|
| 105 | V | 209  | 2.6449   |
| 105 | T | 181  | 2.29056  |
| 105 | G | 56   | 0.70868  |
| 105 | S | 51   | 0.64541  |
| 105 | E | 21   | 0.26576  |
| 105 | Q | 9    | 0.1139   |
| 105 | L | 2    | 0.02531  |
| 105 | K | 1    | 0.01266  |
| 105 | M | 1    | 0.01266  |
| 106 | A | 6691 | 89.54764 |
| 106 | T | 212  | 2.83726  |
| 106 | V | 194  | 2.59636  |
| 106 | S | 120  | 1.606    |
| 106 | P | 110  | 1.47216  |
| 106 | E | 42   | 0.5621   |
| 106 | G | 41   | 0.54872  |
| 106 | I | 24   | 0.3212   |
| 106 | K | 14   | 0.18737  |
| 106 | R | 14   | 0.18737  |
| 106 | L | 8    | 0.10707  |
| 106 | D | 1    | 0.01338  |
| 106 | Q | 1    | 0.01338  |

**Table S5: 2-VH**

| The positions of amino acids | Amino acids | Counts | Percentage(%) |
|------------------------------|-------------|--------|---------------|
| 1                            | H           | 30273  | 65.37315      |
| 1                            | D           | 9906   | 21.39155      |
| 1                            | Q           | 3775   | 8.15194       |
| 1                            | E           | 845    | 1.82474       |
| 1                            | S           | 725    | 1.5656        |
| 1                            | M           | 305    | 0.65863       |
| 1                            | L           | 161    | 0.34767       |
| 1                            | A           | 72     | 0.15548       |
| 1                            | P           | 67     | 0.14468       |
| 1                            | Y           | 57     | 0.12309       |
| 1                            | R           | 35     | 0.07558       |
| 1                            | N           | 23     | 0.04967       |
| 1                            | G           | 22     | 0.04751       |
| 1                            | V           | 16     | 0.03455       |
| 1                            | C           | 13     | 0.02807       |
| 1                            | W           | 6      | 0.01296       |
| 1                            | I           | 3      | 0.00648       |
| 1                            | K           | 3      | 0.00648       |
| 1                            | T           | 1      | 0.00216       |
| 2                            | V           | 45175  | 97.22162      |
| 2                            | C           | 722    | 1.55382       |
| 2                            | M           | 156    | 0.33573       |
| 2                            | G           | 89     | 0.19154       |
| 2                            | L           | 89     | 0.19154       |
| 2                            | W           | 87     | 0.18723       |
| 2                            | A           | 50     | 0.10761       |
| 2                            | H           | 24     | 0.05165       |
| 2                            | E           | 19     | 0.04089       |
| 2                            | S           | 17     | 0.03659       |
| 2                            | D           | 14     | 0.03013       |
| 2                            | R           | 14     | 0.03013       |
| 2                            | Q           | 8      | 0.01722       |
| 2                            | F           | 2      | 0.0043        |
| 3                            | Q           | 48039  | 97.68392      |
| 3                            | A           | 615    | 1.25056       |
| 3                            | S           | 157    | 0.31925       |
| 3                            | C           | 96     | 0.19521       |
| 3                            | P           | 76     | 0.15454       |
| 3                            | V           | 47     | 0.09557       |
| 3                            | R           | 42     | 0.0854        |
| 3                            | E           | 26     | 0.05287       |
| 3                            | K           | 26     | 0.05287       |
| 3                            | L           | 26     | 0.05287       |

|   |   |       |          |
|---|---|-------|----------|
| 3 | H | 15    | 0.0305   |
| 3 | W | 7     | 0.01423  |
| 3 | G | 6     | 0.0122   |
| 4 | L | 48483 | 98.00881 |
| 4 | A | 548   | 1.10779  |
| 4 | W | 150   | 0.30323  |
| 4 | S | 70    | 0.14151  |
| 4 | Q | 56    | 0.1132   |
| 4 | P | 48    | 0.09703  |
| 4 | V | 45    | 0.09097  |
| 4 | M | 34    | 0.06873  |
| 4 | R | 20    | 0.04043  |
| 4 | G | 7     | 0.01415  |
| 4 | F | 2     | 0.00404  |
| 4 | T | 2     | 0.00404  |
| 4 | C | 1     | 0.00202  |
| 4 | D | 1     | 0.00202  |
| 4 | H | 1     | 0.00202  |
| 5 | V | 48992 | 98.36961 |
| 5 | G | 493   | 0.98988  |
| 5 | W | 194   | 0.38953  |
| 5 | L | 35    | 0.07028  |
| 5 | A | 27    | 0.05421  |
| 5 | E | 24    | 0.04819  |
| 5 | M | 22    | 0.04417  |
| 5 | F | 7     | 0.01406  |
| 5 | C | 5     | 0.01004  |
| 5 | P | 1     | 0.00201  |
| 5 | Q | 1     | 0.00201  |
| 5 | R | 1     | 0.00201  |
| 5 | S | 1     | 0.00201  |
| 5 | T | 1     | 0.00201  |
| 6 | E | 49175 | 98.47211 |
| 6 | G | 435   | 0.87108  |
| 6 | S | 125   | 0.25031  |
| 6 | M | 57    | 0.11414  |
| 6 | W | 54    | 0.10813  |
| 6 | A | 31    | 0.06208  |
| 6 | V | 30    | 0.06007  |
| 6 | K | 14    | 0.02803  |
| 6 | D | 5     | 0.01001  |
| 6 | Q | 4     | 0.00801  |
| 6 | R | 3     | 0.00601  |
| 6 | Y | 3     | 0.00601  |
| 6 | C | 1     | 0.002    |
| 6 | L | 1     | 0.002    |

|    |    |       |          |
|----|----|-------|----------|
| 7  | S  | 49281 | 98.49305 |
| 7  | V  | 384   | 0.76746  |
| 7  | L  | 114   | 0.22784  |
| 7  | A  | 70    | 0.1399   |
| 7  | F  | 60    | 0.11992  |
| 7  | Y  | 49    | 0.09793  |
| 7  | P  | 28    | 0.05596  |
| 7  | G  | 14    | 0.02798  |
| 7  | T  | 14    | 0.02798  |
| 7  | W  | 7     | 0.01399  |
| 7  | C  | 5     | 0.00999  |
| 7  | E  | 5     | 0.00999  |
| 7  | D  | 1     | 0.002    |
| 7  | M  | 1     | 0.002    |
| 7  | N  | 1     | 0.002    |
| 7  | Q  | 1     | 0.002    |
| 8  | G  | 49471 | 98.81552 |
| 8  | W  | 398   | 0.79498  |
| 8  | L  | 56    | 0.11186  |
| 8  | R  | 31    | 0.06192  |
| 8  | H  | 28    | 0.05593  |
| 8  | D  | 22    | 0.04394  |
| 8  | E  | 17    | 0.03396  |
| 8  | S  | 12    | 0.02397  |
| 8  | V  | 10    | 0.01997  |
| 8  | A  | 8     | 0.01598  |
| 8  | Q  | 7     | 0.01398  |
| 8  | F  | 2     | 0.00399  |
| 8  | P  | 1     | 0.002    |
| 8  | T  | 1     | 0.002    |
| 9  | G  | 49633 | 98.98686 |
| 9  | E  | 234   | 0.46668  |
| 9  | R  | 115   | 0.22935  |
| 9  | V  | 85    | 0.16952  |
| 9  | M  | 34    | 0.06781  |
| 9  | S  | 14    | 0.02792  |
| 9  | A  | 6     | 0.01197  |
| 9  | C  | 6     | 0.01197  |
| 9  | D  | 4     | 0.00798  |
| 9  | W  | 4     | 0.00798  |
| 9  | P  | 2     | 0.00399  |
| 9  | F  | 1     | 0.00199  |
| 9  | H  | 1     | 0.00199  |
| 9  | K  | 1     | 0.00199  |
| 9  | L  | 1     | 0.00199  |
| 10 | NA | 0     | 0        |

|    |   |       |          |
|----|---|-------|----------|
| 11 | G | 45494 | 90.62369 |
| 11 | D | 2408  | 4.79672  |
| 11 | A | 1041  | 2.07366  |
| 11 | N | 247   | 0.49202  |
| 11 | R | 216   | 0.43027  |
| 11 | T | 205   | 0.40836  |
| 11 | S | 161   | 0.32071  |
| 11 | E | 151   | 0.30079  |
| 11 | V | 101   | 0.20119  |
| 11 | Q | 66    | 0.13147  |
| 11 | I | 23    | 0.04582  |
| 11 | C | 18    | 0.03586  |
| 11 | L | 17    | 0.03386  |
| 11 | Y | 16    | 0.03187  |
| 11 | H | 15    | 0.02988  |
| 11 | W | 11    | 0.02191  |
| 11 | K | 6     | 0.01195  |
| 11 | F | 2     | 0.00398  |
| 11 | M | 2     | 0.00398  |
| 11 | P | 1     | 0.00199  |
| 12 | L | 41822 | 83.26929 |
| 12 | S | 6715  | 13.36984 |
| 12 | V | 347   | 0.69089  |
| 12 | F | 335   | 0.667    |
| 12 | T | 213   | 0.42409  |
| 12 | W | 186   | 0.37033  |
| 12 | M | 162   | 0.32255  |
| 12 | A | 124   | 0.24689  |
| 12 | P | 83    | 0.16526  |
| 12 | Y | 47    | 0.09358  |
| 12 | R | 46    | 0.09159  |
| 12 | H | 38    | 0.07566  |
| 12 | Q | 38    | 0.07566  |
| 12 | E | 19    | 0.03783  |
| 12 | D | 16    | 0.03186  |
| 12 | K | 14    | 0.02787  |
| 12 | G | 12    | 0.02389  |
| 12 | I | 5     | 0.00996  |
| 12 | C | 3     | 0.00597  |
| 13 | V | 48693 | 96.89571 |
| 13 | A | 803   | 1.59791  |
| 13 | G | 200   | 0.39799  |
| 13 | M | 192   | 0.38207  |
| 13 | E | 132   | 0.26267  |
| 13 | L | 79    | 0.1572   |
| 13 | C | 59    | 0.11741  |



|    |   |       |          |
|----|---|-------|----------|
| 13 | I | 39    | 0.07761  |
| 13 | W | 27    | 0.05373  |
| 13 | R | 8     | 0.01592  |
| 13 | P | 7     | 0.01393  |
| 13 | T | 5     | 0.00995  |
| 13 | S | 3     | 0.00597  |
| 13 | N | 2     | 0.00398  |
| 13 | Q | 2     | 0.00398  |
| 13 | D | 1     | 0.00199  |
| 13 | F | 1     | 0.00199  |
| 14 | Q | 47468 | 94.44301 |
| 14 | R | 1100  | 2.18858  |
| 14 | H | 361   | 0.71825  |
| 14 | E | 331   | 0.65856  |
| 14 | K | 229   | 0.45562  |
| 14 | P | 223   | 0.44368  |
| 14 | L | 191   | 0.38002  |
| 14 | A | 179   | 0.35614  |
| 14 | S | 60    | 0.11938  |
| 14 | C | 36    | 0.07163  |
| 14 | T | 18    | 0.03581  |
| 14 | N | 16    | 0.03183  |
| 14 | G | 9     | 0.01791  |
| 14 | V | 9     | 0.01791  |
| 14 | D | 8     | 0.01592  |
| 14 | W | 8     | 0.01592  |
| 14 | Y | 8     | 0.01592  |
| 14 | M | 4     | 0.00796  |
| 14 | F | 2     | 0.00398  |
| 14 | I | 1     | 0.00199  |
| 15 | P | 42098 | 83.74212 |
| 15 | A | 4959  | 9.86453  |
| 15 | S | 1915  | 3.80935  |
| 15 | T | 555   | 1.10402  |
| 15 | F | 230   | 0.45752  |
| 15 | L | 151   | 0.30037  |
| 15 | V | 150   | 0.29838  |
| 15 | H | 64    | 0.12731  |
| 15 | G | 31    | 0.06167  |
| 15 | R | 26    | 0.05172  |
| 15 | D | 25    | 0.04973  |
| 15 | I | 21    | 0.04177  |
| 15 | E | 20    | 0.03978  |
| 15 | K | 8     | 0.01591  |
| 15 | Y | 7     | 0.01392  |
| 15 | Q | 4     | 0.00796  |

|    |   |       |          |
|----|---|-------|----------|
| 15 | N | 3     | 0.00597  |
| 15 | M | 2     | 0.00398  |
| 15 | C | 1     | 0.00199  |
| 15 | W | 1     | 0.00199  |
| 16 | G | 49643 | 98.7115  |
| 16 | E | 195   | 0.38774  |
| 16 | W | 160   | 0.31815  |
| 16 | R | 125   | 0.24855  |
| 16 | A | 78    | 0.1551   |
| 16 | V | 42    | 0.08351  |
| 16 | L | 25    | 0.04971  |
| 16 | D | 5     | 0.00994  |
| 16 | M | 5     | 0.00994  |
| 16 | T | 4     | 0.00795  |
| 16 | P | 3     | 0.00597  |
| 16 | S | 3     | 0.00597  |
| 16 | K | 2     | 0.00398  |
| 16 | C | 1     | 0.00199  |
| 17 | G | 46615 | 92.64817 |
| 17 | E | 2452  | 4.8734   |
| 17 | R | 384   | 0.76321  |
| 17 | K | 223   | 0.44322  |
| 17 | A | 163   | 0.32397  |
| 17 | V | 139   | 0.27627  |
| 17 | D | 136   | 0.2703   |
| 17 | W | 72    | 0.1431   |
| 17 | Q | 53    | 0.10534  |
| 17 | T | 26    | 0.05168  |
| 17 | S | 22    | 0.04373  |
| 17 | M | 11    | 0.02186  |
| 17 | N | 7     | 0.01391  |
| 17 | L | 5     | 0.00994  |
| 17 | C | 3     | 0.00596  |
| 17 | H | 2     | 0.00398  |
| 17 | I | 1     | 0.00199  |
| 18 | S | 48911 | 97.08031 |
| 18 | T | 774   | 1.53626  |
| 18 | P | 256   | 0.50812  |
| 18 | A | 162   | 0.32154  |
| 18 | F | 126   | 0.25009  |
| 18 | M | 26    | 0.05161  |
| 18 | V | 23    | 0.04565  |
| 18 | Y | 23    | 0.04565  |
| 18 | R | 22    | 0.04367  |
| 18 | L | 18    | 0.03573  |
| 18 | G | 12    | 0.02382  |

|    |   |       |          |
|----|---|-------|----------|
| 18 | N | 9     | 0.01786  |
| 18 | C | 8     | 0.01588  |
| 18 | I | 6     | 0.01191  |
| 18 | W | 2     | 0.00397  |
| 18 | D | 1     | 0.00198  |
| 18 | E | 1     | 0.00198  |
| 18 | H | 1     | 0.00198  |
| 18 | K | 1     | 0.00198  |
| 19 | L | 49459 | 98.09596 |
| 19 | P | 259   | 0.5137   |
| 19 | V | 238   | 0.47204  |
| 19 | Q | 138   | 0.27371  |
| 19 | R | 113   | 0.22412  |
| 19 | M | 85    | 0.16859  |
| 19 | A | 58    | 0.11504  |
| 19 | W | 23    | 0.04562  |
| 19 | T | 17    | 0.03372  |
| 19 | S | 7     | 0.01388  |
| 19 | G | 5     | 0.00992  |
| 19 | H | 5     | 0.00992  |
| 19 | K | 5     | 0.00992  |
| 19 | D | 2     | 0.00397  |
| 19 | E | 2     | 0.00397  |
| 19 | F | 2     | 0.00397  |
| 19 | I | 1     | 0.00198  |
| 20 | R | 44359 | 87.93363 |
| 20 | T | 3125  | 6.19474  |
| 20 | K | 1476  | 2.9259   |
| 20 | S | 528   | 1.04666  |
| 20 | G | 378   | 0.74932  |
| 20 | I | 193   | 0.38259  |
| 20 | N | 131   | 0.25968  |
| 20 | Q | 64    | 0.12687  |
| 20 | A | 39    | 0.07731  |
| 20 | E | 39    | 0.07731  |
| 20 | L | 28    | 0.0555   |
| 20 | M | 25    | 0.04956  |
| 20 | V | 21    | 0.04163  |
| 20 | H | 14    | 0.02775  |
| 20 | D | 11    | 0.02181  |
| 20 | C | 7     | 0.01388  |
| 20 | P | 5     | 0.00991  |
| 20 | W | 2     | 0.00396  |
| 20 | F | 1     | 0.00198  |
| 21 | L | 47963 | 94.9424  |
| 21 | V | 1230  | 2.43478  |

|    |   |       |          |
|----|---|-------|----------|
| 21 | I | 797   | 1.57766  |
| 21 | P | 268   | 0.5305   |
| 21 | H | 100   | 0.19795  |
| 21 | F | 65    | 0.12867  |
| 21 | R | 41    | 0.08116  |
| 21 | G | 19    | 0.03761  |
| 21 | A | 15    | 0.02969  |
| 21 | T | 5     | 0.0099   |
| 21 | S | 4     | 0.00792  |
| 21 | C | 3     | 0.00594  |
| 21 | Q | 3     | 0.00594  |
| 21 | D | 2     | 0.00396  |
| 21 | M | 2     | 0.00396  |
| 21 | W | 1     | 0.00198  |
| 22 | S | 49009 | 96.92661 |
| 22 | A | 624   | 1.2341   |
| 22 | T | 458   | 0.9058   |
| 22 | P | 229   | 0.4529   |
| 22 | F | 66    | 0.13053  |
| 22 | Q | 32    | 0.06329  |
| 22 | L | 31    | 0.06131  |
| 22 | Y | 27    | 0.0534   |
| 22 | V | 25    | 0.04944  |
| 22 | R | 19    | 0.03758  |
| 22 | D | 10    | 0.01978  |
| 22 | G | 7     | 0.01384  |
| 22 | I | 7     | 0.01384  |
| 22 | C | 5     | 0.00989  |
| 22 | N | 5     | 0.00989  |
| 22 | H | 3     | 0.00593  |
| 22 | E | 2     | 0.00396  |
| 22 | K | 2     | 0.00396  |
| 22 | W | 2     | 0.00396  |
| 23 | C | 50112 | 98.94758 |
| 23 | R | 242   | 0.47784  |
| 23 | Y | 86    | 0.16981  |
| 23 | S | 70    | 0.13822  |
| 23 | G | 39    | 0.07701  |
| 23 | W | 33    | 0.06516  |
| 23 | L | 31    | 0.06121  |
| 23 | F | 19    | 0.03752  |
| 23 | V | 4     | 0.0079   |
| 23 | A | 3     | 0.00592  |
| 23 | E | 2     | 0.00395  |
| 23 | P | 2     | 0.00395  |
| 23 | I | 1     | 0.00197  |

|    |   |       |          |
|----|---|-------|----------|
| 23 | M | 1     | 0.00197  |
| 24 | A | 37809 | 74.63727 |
| 24 | V | 4398  | 8.68192  |
| 24 | T | 4057  | 8.00876  |
| 24 | E | 1582  | 3.12296  |
| 24 | S | 747   | 1.47462  |
| 24 | K | 415   | 0.81924  |
| 24 | G | 403   | 0.79555  |
| 24 | Q | 306   | 0.60406  |
| 24 | L | 303   | 0.59814  |
| 24 | I | 229   | 0.45206  |
| 24 | R | 207   | 0.40863  |
| 24 | D | 71    | 0.14016  |
| 24 | P | 69    | 0.13621  |
| 24 | H | 44    | 0.08686  |
| 24 | N | 11    | 0.02171  |
| 24 | C | 2     | 0.00395  |
| 24 | F | 2     | 0.00395  |
| 24 | M | 1     | 0.00197  |
| 24 | Y | 1     | 0.00197  |
| 25 | A | 42539 | 83.8835  |
| 25 | V | 3010  | 5.93548  |
| 25 | T | 2360  | 4.65373  |
| 25 | G | 1390  | 2.74097  |
| 25 | S | 295   | 0.58172  |
| 25 | P | 268   | 0.52847  |
| 25 | I | 237   | 0.46735  |
| 25 | D | 143   | 0.28198  |
| 25 | F | 107   | 0.211    |
| 25 | L | 89    | 0.1755   |
| 25 | Y | 77    | 0.15184  |
| 25 | C | 51    | 0.10057  |
| 25 | R | 41    | 0.08085  |
| 25 | E | 38    | 0.07493  |
| 25 | H | 26    | 0.05127  |
| 25 | N | 20    | 0.03944  |
| 25 | M | 13    | 0.02563  |
| 25 | Q | 4     | 0.00789  |
| 25 | K | 2     | 0.00394  |
| 25 | W | 2     | 0.00394  |
| 26 | S | 49022 | 96.58175 |
| 26 | A | 511   | 1.00676  |
| 26 | P | 401   | 0.79004  |
| 26 | T | 299   | 0.58908  |
| 26 | F | 158   | 0.31129  |
| 26 | Y | 101   | 0.19899  |

|    |   |       |          |
|----|---|-------|----------|
| 26 | D | 49    | 0.09654  |
| 26 | L | 39    | 0.07684  |
| 26 | N | 38    | 0.07487  |
| 26 | H | 28    | 0.05516  |
| 26 | R | 27    | 0.05319  |
| 26 | I | 23    | 0.04531  |
| 26 | G | 17    | 0.03349  |
| 26 | E | 14    | 0.02758  |
| 26 | V | 14    | 0.02758  |
| 26 | C | 10    | 0.0197   |
| 26 | K | 4     | 0.00788  |
| 26 | Q | 1     | 0.00197  |
| 26 | W | 1     | 0.00197  |
| 27 | G | 47908 | 94.34423 |
| 27 | E | 1014  | 1.99685  |
| 27 | A | 690   | 1.3588   |
| 27 | R | 615   | 1.21111  |
| 27 | D | 105   | 0.20677  |
| 27 | V | 99    | 0.19496  |
| 27 | T | 93    | 0.18314  |
| 27 | K | 71    | 0.13982  |
| 27 | S | 46    | 0.09059  |
| 27 | L | 32    | 0.06302  |
| 27 | P | 29    | 0.05711  |
| 27 | I | 28    | 0.05514  |
| 27 | Q | 22    | 0.04332  |
| 27 | M | 13    | 0.0256   |
| 27 | N | 5     | 0.00985  |
| 27 | W | 5     | 0.00985  |
| 27 | C | 2     | 0.00394  |
| 27 | F | 1     | 0.00197  |
| 27 | H | 1     | 0.00197  |
| 27 | Y | 1     | 0.00197  |
| 28 | F | 43334 | 85.283   |
| 28 | L | 3090  | 6.08124  |
| 28 | Y | 1189  | 2.34     |
| 28 | S | 723   | 1.42289  |
| 28 | V | 611   | 1.20247  |
| 28 | I | 495   | 0.97418  |
| 28 | G | 401   | 0.78918  |
| 28 | D | 195   | 0.38377  |
| 28 | P | 170   | 0.33457  |
| 28 | A | 160   | 0.31489  |
| 28 | R | 92    | 0.18106  |
| 28 | N | 86    | 0.16925  |
| 28 | T | 86    | 0.16925  |

|    |   |       |          |
|----|---|-------|----------|
| 28 | H | 55    | 0.10824  |
| 28 | C | 48    | 0.09447  |
| 28 | M | 36    | 0.07085  |
| 28 | W | 24    | 0.04723  |
| 28 | E | 10    | 0.01968  |
| 28 | Q | 6     | 0.01181  |
| 28 | K | 1     | 0.00197  |
| 29 | T | 39056 | 76.83047 |
| 29 | A | 2724  | 5.35862  |
| 29 | S | 2692  | 5.29567  |
| 29 | I | 1895  | 3.72782  |
| 29 | P | 1313  | 2.58292  |
| 29 | R | 673   | 1.32392  |
| 29 | D | 492   | 0.96786  |
| 29 | N | 366   | 0.71999  |
| 29 | V | 264   | 0.51934  |
| 29 | G | 244   | 0.47999  |
| 29 | L | 232   | 0.45639  |
| 29 | M | 199   | 0.39147  |
| 29 | K | 183   | 0.36     |
| 29 | E | 160   | 0.31475  |
| 29 | Q | 158   | 0.31082  |
| 29 | F | 104   | 0.20459  |
| 29 | H | 34    | 0.06688  |
| 29 | Y | 32    | 0.06295  |
| 29 | W | 8     | 0.01574  |
| 29 | C | 5     | 0.00984  |
| 30 | F | 44120 | 86.74282 |
| 30 | L | 1529  | 3.00611  |
| 30 | V | 1240  | 2.43792  |
| 30 | Y | 977   | 1.92085  |
| 30 | S | 886   | 1.74193  |
| 30 | I | 695   | 1.36642  |
| 30 | A | 386   | 0.7589   |
| 30 | G | 192   | 0.37748  |
| 30 | T | 158   | 0.31064  |
| 30 | R | 149   | 0.29294  |
| 30 | D | 127   | 0.24969  |
| 30 | H | 93    | 0.18284  |
| 30 | N | 79    | 0.15532  |
| 30 | W | 72    | 0.14156  |
| 30 | M | 48    | 0.09437  |
| 30 | P | 47    | 0.09241  |
| 30 | C | 33    | 0.06488  |
| 30 | K | 17    | 0.03342  |
| 30 | E | 15    | 0.02949  |

|    |   |       |          |
|----|---|-------|----------|
| 31 | S | 37539 | 73.78528 |
| 31 | R | 3149  | 6.18956  |
| 31 | G | 2495  | 4.90408  |
| 31 | N | 1955  | 3.84268  |
| 31 | D | 1827  | 3.59108  |
| 31 | T | 1451  | 2.85203  |
| 31 | A | 590   | 1.15968  |
| 31 | K | 509   | 1.00047  |
| 31 | E | 327   | 0.64274  |
| 31 | V | 289   | 0.56805  |
| 31 | I | 163   | 0.32039  |
| 31 | H | 128   | 0.25159  |
| 31 | Y | 113   | 0.22211  |
| 31 | M | 80    | 0.15725  |
| 31 | C | 72    | 0.14152  |
| 31 | P | 64    | 0.1258   |
| 31 | F | 46    | 0.09042  |
| 31 | L | 45    | 0.08845  |
| 31 | Q | 21    | 0.04128  |
| 31 | W | 13    | 0.02555  |
| 32 | S | 17874 | 35.11315 |
| 32 | N | 9170  | 18.0143  |
| 32 | T | 6279  | 12.33498 |
| 32 | D | 4728  | 9.28807  |
| 32 | R | 4122  | 8.0976   |
| 32 | A | 1800  | 3.53607  |
| 32 | G | 1528  | 3.00173  |
| 32 | I | 1157  | 2.27291  |
| 32 | V | 672   | 1.32013  |
| 32 | K | 585   | 1.14922  |
| 32 | Y | 585   | 1.14922  |
| 32 | E | 469   | 0.92134  |
| 32 | L | 468   | 0.91938  |
| 32 | M | 411   | 0.8074   |
| 32 | H | 344   | 0.67578  |
| 32 | P | 324   | 0.63649  |
| 32 | F | 152   | 0.2986   |
| 32 | Q | 104   | 0.20431  |
| 32 | W | 86    | 0.16895  |
| 32 | C | 46    | 0.09037  |
| 33 | Y | 34759 | 68.2459  |
| 33 | H | 2542  | 4.99097  |
| 33 | N | 2507  | 4.92225  |
| 33 | S | 2189  | 4.29789  |
| 33 | F | 1969  | 3.86594  |
| 33 | A | 1570  | 3.08254  |



|    |    |       |          |
|----|----|-------|----------|
| 33 | V  | 1074  | 2.10869  |
| 33 | T  | 1062  | 2.08513  |
| 33 | D  | 755   | 1.48237  |
| 33 | C  | 486   | 0.95421  |
| 33 | R  | 363   | 0.71271  |
| 33 | W  | 313   | 0.61454  |
| 33 | G  | 254   | 0.4987   |
| 33 | L  | 253   | 0.49674  |
| 33 | I  | 249   | 0.48889  |
| 33 | Q  | 204   | 0.40053  |
| 33 | K  | 146   | 0.28666  |
| 33 | M  | 102   | 0.20027  |
| 33 | E  | 77    | 0.15118  |
| 33 | P  | 58    | 0.11388  |
| 34 | A  | 15872 | 31.13866 |
| 34 | D  | 9274  | 18.1943  |
| 34 | Y  | 6045  | 11.85945 |
| 34 | G  | 5557  | 10.90206 |
| 34 | W  | 4333  | 8.50075  |
| 34 | S  | 1739  | 3.41168  |
| 34 | T  | 1528  | 2.99772  |
| 34 | V  | 1427  | 2.79958  |
| 34 | C  | 1300  | 2.55042  |
| 34 | P  | 946   | 1.85592  |
| 34 | H  | 734   | 1.44001  |
| 34 | F  | 597   | 1.17123  |
| 34 | R  | 508   | 0.99663  |
| 34 | E  | 349   | 0.68469  |
| 34 | N  | 284   | 0.55717  |
| 34 | I  | 186   | 0.36491  |
| 34 | L  | 160   | 0.3139   |
| 34 | Q  | 67    | 0.13144  |
| 34 | M  | 51    | 0.10005  |
| 34 | K  | 15    | 0.02943  |
| 35 | NA | 0     | 0        |
| 36 | NA | 0     | 0        |
| 37 | NA | 0     | 0        |
| 38 | NA | 0     | 0        |
| 39 | M  | 44822 | 87.77269 |
| 39 | I  | 2273  | 4.4511   |
| 39 | V  | 1464  | 2.86688  |
| 39 | L  | 1187  | 2.32444  |
| 39 | T  | 495   | 0.96933  |
| 39 | F  | 229   | 0.44844  |
| 39 | A  | 188   | 0.36815  |
| 39 | W  | 115   | 0.2252   |

|    |   |       |          |
|----|---|-------|----------|
| 39 | K | 96    | 0.18799  |
| 39 | G | 50    | 0.09791  |
| 39 | R | 46    | 0.09008  |
| 39 | Q | 38    | 0.07441  |
| 39 | S | 30    | 0.05875  |
| 39 | P | 17    | 0.03329  |
| 39 | C | 7     | 0.01371  |
| 39 | H | 3     | 0.00587  |
| 39 | Y | 3     | 0.00587  |
| 39 | E | 2     | 0.00392  |
| 39 | N | 1     | 0.00196  |
| 40 | S | 25554 | 49.91698 |
| 40 | T | 6246  | 12.20089 |
| 40 | N | 4782  | 9.34112  |
| 40 | G | 3303  | 6.45205  |
| 40 | Y | 3248  | 6.34462  |
| 40 | A | 2180  | 4.25839  |
| 40 | H | 1953  | 3.81497  |
| 40 | D | 1093  | 2.13506  |
| 40 | I | 751   | 1.467    |
| 40 | M | 591   | 1.15445  |
| 40 | R | 464   | 0.90637  |
| 40 | V | 352   | 0.68759  |
| 40 | F | 210   | 0.41021  |
| 40 | C | 151   | 0.29496  |
| 40 | K | 128   | 0.25003  |
| 40 | L | 88    | 0.1719   |
| 40 | Q | 59    | 0.11525  |
| 40 | E | 17    | 0.03321  |
| 40 | W | 16    | 0.03125  |
| 40 | P | 7     | 0.01367  |
| 41 | W | 50984 | 99.1463  |
| 41 | R | 263   | 0.51144  |
| 41 | C | 61    | 0.11862  |
| 41 | L | 35    | 0.06806  |
| 41 | Y | 27    | 0.05251  |
| 41 | G | 21    | 0.04084  |
| 41 | S | 11    | 0.02139  |
| 41 | F | 10    | 0.01945  |
| 41 | V | 4     | 0.00778  |
| 41 | M | 3     | 0.00583  |
| 41 | E | 1     | 0.00194  |
| 41 | I | 1     | 0.00194  |
| 41 | P | 1     | 0.00194  |
| 41 | Q | 1     | 0.00194  |
| 42 | V | 46329 | 89.62335 |

|    |   |       |          |
|----|---|-------|----------|
| 42 | F | 2639  | 5.10514  |
| 42 | I | 1121  | 2.16857  |
| 42 | L | 445   | 0.86085  |
| 42 | A | 440   | 0.85118  |
| 42 | Y | 408   | 0.78928  |
| 42 | D | 91    | 0.17604  |
| 42 | G | 66    | 0.12768  |
| 42 | S | 37    | 0.07158  |
| 42 | T | 27    | 0.05223  |
| 42 | N | 18    | 0.03482  |
| 42 | W | 15    | 0.02902  |
| 42 | H | 14    | 0.02708  |
| 42 | M | 12    | 0.02321  |
| 42 | P | 10    | 0.01934  |
| 42 | R | 10    | 0.01934  |
| 42 | C | 6     | 0.01161  |
| 42 | Q | 3     | 0.0058   |
| 42 | E | 2     | 0.00387  |
| 43 | R | 51407 | 99.04628 |
| 43 | C | 177   | 0.34103  |
| 43 | H | 156   | 0.30057  |
| 43 | S | 63    | 0.12138  |
| 43 | L | 24    | 0.04624  |
| 43 | P | 20    | 0.03853  |
| 43 | G | 18    | 0.03468  |
| 43 | W | 11    | 0.02119  |
| 43 | F | 6     | 0.01156  |
| 43 | A | 4     | 0.00771  |
| 43 | Q | 4     | 0.00771  |
| 43 | T | 4     | 0.00771  |
| 43 | V | 3     | 0.00578  |
| 43 | N | 2     | 0.00385  |
| 43 | Y | 2     | 0.00385  |
| 43 | M | 1     | 0.00193  |
| 44 | Q | 49758 | 95.65903 |
| 44 | R | 945   | 1.81675  |
| 44 | L | 669   | 1.28614  |
| 44 | H | 255   | 0.49023  |
| 44 | K | 135   | 0.25954  |
| 44 | E | 86    | 0.16533  |
| 44 | M | 32    | 0.06152  |
| 44 | S | 32    | 0.06152  |
| 44 | P | 27    | 0.05191  |
| 44 | A | 22    | 0.04229  |
| 44 | W | 22    | 0.04229  |
| 44 | V | 20    | 0.03845  |

|    |   |       |          |
|----|---|-------|----------|
| 44 | D | 5     | 0.00961  |
| 44 | G | 3     | 0.00577  |
| 44 | T | 3     | 0.00577  |
| 44 | C | 1     | 0.00192  |
| 44 | F | 1     | 0.00192  |
| 45 | A | 46700 | 89.66113 |
| 45 | V | 1758  | 3.37525  |
| 45 | T | 1143  | 2.19449  |
| 45 | G | 729   | 1.39964  |
| 45 | P | 514   | 0.98685  |
| 45 | S | 358   | 0.68734  |
| 45 | D | 332   | 0.63742  |
| 45 | R | 159   | 0.30527  |
| 45 | I | 135   | 0.25919  |
| 45 | N | 95    | 0.18239  |
| 45 | L | 46    | 0.08832  |
| 45 | F | 40    | 0.0768   |
| 45 | Y | 20    | 0.0384   |
| 45 | C | 19    | 0.03648  |
| 45 | E | 11    | 0.02112  |
| 45 | K | 11    | 0.02112  |
| 45 | H | 9     | 0.01728  |
| 45 | M | 3     | 0.00576  |
| 45 | Q | 3     | 0.00576  |
| 46 | P | 49979 | 95.81129 |
| 46 | A | 520   | 0.99686  |
| 46 | S | 480   | 0.92017  |
| 46 | Q | 456   | 0.87417  |
| 46 | L | 245   | 0.46967  |
| 46 | R | 166   | 0.31823  |
| 46 | T | 158   | 0.30289  |
| 46 | K | 64    | 0.12269  |
| 46 | H | 30    | 0.05751  |
| 46 | V | 19    | 0.03642  |
| 46 | E | 13    | 0.02492  |
| 46 | G | 11    | 0.02109  |
| 46 | D | 10    | 0.01917  |
| 46 | M | 6     | 0.0115   |
| 46 | W | 4     | 0.00767  |
| 46 | C | 2     | 0.00383  |
| 46 | N | 1     | 0.00192  |
| 47 | G | 51116 | 97.84652 |
| 47 | E | 611   | 1.16958  |
| 47 | R | 136   | 0.26033  |
| 47 | V | 122   | 0.23353  |
| 47 | A | 76    | 0.14548  |

|    |   |       |          |
|----|---|-------|----------|
| 47 | D | 44    | 0.08423  |
| 47 | S | 26    | 0.04977  |
| 47 | N | 24    | 0.04594  |
| 47 | W | 22    | 0.04211  |
| 47 | T | 18    | 0.03446  |
| 47 | K | 16    | 0.03063  |
| 47 | Q | 15    | 0.02871  |
| 47 | L | 6     | 0.01149  |
| 47 | M | 3     | 0.00574  |
| 47 | H | 2     | 0.00383  |
| 47 | Y | 2     | 0.00383  |
| 47 | C | 1     | 0.00191  |
| 47 | P | 1     | 0.00191  |
| 48 | K | 49771 | 95.20266 |
| 48 | R | 679   | 1.2988   |
| 48 | E | 542   | 1.03675  |
| 48 | Q | 425   | 0.81295  |
| 48 | M | 238   | 0.45525  |
| 48 | N | 196   | 0.37491  |
| 48 | T | 167   | 0.31944  |
| 48 | A | 73    | 0.13964  |
| 48 | S | 66    | 0.12625  |
| 48 | L | 43    | 0.08225  |
| 48 | G | 38    | 0.07269  |
| 48 | V | 15    | 0.02869  |
| 48 | H | 9     | 0.01722  |
| 48 | D | 6     | 0.01148  |
| 48 | W | 5     | 0.00956  |
| 48 | C | 2     | 0.00383  |
| 48 | I | 2     | 0.00383  |
| 48 | P | 2     | 0.00383  |
| 49 | G | 48337 | 92.34664 |
| 49 | E | 2658  | 5.07804  |
| 49 | A | 618   | 1.18067  |
| 49 | R | 230   | 0.43941  |
| 49 | D | 135   | 0.25791  |
| 49 | V | 104   | 0.19869  |
| 49 | Q | 62    | 0.11845  |
| 49 | K | 44    | 0.08406  |
| 49 | W | 33    | 0.06305  |
| 49 | S | 32    | 0.06114  |
| 49 | P | 30    | 0.05731  |
| 49 | L | 24    | 0.04585  |
| 49 | T | 13    | 0.02484  |
| 49 | C | 9     | 0.01719  |
| 49 | N | 9     | 0.01719  |

|    |   |       |          |
|----|---|-------|----------|
| 49 | M | 3     | 0.00573  |
| 49 | H | 1     | 0.00191  |
| 49 | I | 1     | 0.00191  |
| 50 | L | 47916 | 91.38868 |
| 50 | R | 2201  | 4.1979   |
| 50 | F | 838   | 1.59829  |
| 50 | P | 757   | 1.4438   |
| 50 | V | 192   | 0.3662   |
| 50 | I | 173   | 0.32996  |
| 50 | H | 100   | 0.19073  |
| 50 | C | 83    | 0.1583   |
| 50 | M | 51    | 0.09727  |
| 50 | Q | 39    | 0.07438  |
| 50 | S | 20    | 0.03815  |
| 50 | K | 15    | 0.02861  |
| 50 | G | 14    | 0.0267   |
| 50 | A | 7     | 0.01335  |
| 50 | T | 7     | 0.01335  |
| 50 | Y | 7     | 0.01335  |
| 50 | D | 5     | 0.00954  |
| 50 | E | 3     | 0.00572  |
| 50 | W | 3     | 0.00572  |
| 51 | E | 50865 | 96.90233 |
| 51 | D | 466   | 0.88777  |
| 51 | K | 366   | 0.69726  |
| 51 | G | 252   | 0.48008  |
| 51 | Q | 242   | 0.46103  |
| 51 | V | 104   | 0.19813  |
| 51 | A | 89    | 0.16955  |
| 51 | N | 22    | 0.04191  |
| 51 | S | 17    | 0.03239  |
| 51 | W | 16    | 0.03048  |
| 51 | T | 14    | 0.02667  |
| 51 | R | 12    | 0.02286  |
| 51 | L | 8     | 0.01524  |
| 51 | M | 6     | 0.01143  |
| 51 | H | 4     | 0.00762  |
| 51 | Y | 4     | 0.00762  |
| 51 | C | 3     | 0.00572  |
| 51 | P | 1     | 0.00191  |
| 52 | W | 48976 | 93.17581 |
| 52 | G | 1718  | 3.26846  |
| 52 | R | 549   | 1.04446  |
| 52 | L | 313   | 0.59548  |
| 52 | C | 292   | 0.55552  |
| 52 | A | 160   | 0.3044   |

|    |   |       |          |
|----|---|-------|----------|
| 52 | Y | 123   | 0.234    |
| 52 | V | 98    | 0.18644  |
| 52 | S | 83    | 0.15791  |
| 52 | E | 68    | 0.12937  |
| 52 | F | 62    | 0.11795  |
| 52 | M | 26    | 0.04946  |
| 52 | H | 23    | 0.04376  |
| 52 | Q | 18    | 0.03424  |
| 52 | K | 17    | 0.03234  |
| 52 | P | 12    | 0.02283  |
| 52 | T | 12    | 0.02283  |
| 52 | D | 10    | 0.01902  |
| 52 | I | 2     | 0.0038   |
| 52 | N | 1     | 0.0019   |
| 53 | V | 48135 | 91.49749 |
| 53 | I | 2806  | 5.33379  |
| 53 | L | 954   | 1.81341  |
| 53 | A | 264   | 0.50182  |
| 53 | M | 174   | 0.33075  |
| 53 | D | 80    | 0.15207  |
| 53 | G | 56    | 0.10645  |
| 53 | T | 34    | 0.06463  |
| 53 | E | 33    | 0.06273  |
| 53 | F | 33    | 0.06273  |
| 53 | C | 11    | 0.02091  |
| 53 | S | 10    | 0.01901  |
| 53 | N | 6     | 0.01141  |
| 53 | Q | 3     | 0.0057   |
| 53 | R | 3     | 0.0057   |
| 53 | W | 3     | 0.0057   |
| 53 | H | 2     | 0.0038   |
| 53 | P | 1     | 0.0019   |
| 54 | S | 46472 | 88.21899 |
| 54 | A | 4468  | 8.48172  |
| 54 | T | 600   | 1.139    |
| 54 | G | 301   | 0.5714   |
| 54 | C | 296   | 0.5619   |
| 54 | L | 170   | 0.32272  |
| 54 | P | 158   | 0.29994  |
| 54 | I | 74    | 0.14048  |
| 54 | V | 48    | 0.09112  |
| 54 | F | 27    | 0.05125  |
| 54 | Q | 26    | 0.04936  |
| 54 | W | 12    | 0.02278  |
| 54 | M | 9     | 0.01708  |
| 54 | Y | 9     | 0.01708  |

|    |   |       |          |
|----|---|-------|----------|
| 54 | R | 5     | 0.00949  |
| 54 | E | 2     | 0.0038   |
| 54 | H | 1     | 0.0019   |
| 55 | S | 11994 | 22.73485 |
| 55 | A | 9821  | 18.61589 |
| 55 | T | 9516  | 18.03776 |
| 55 | G | 9261  | 17.5544  |
| 55 | V | 2428  | 4.60232  |
| 55 | R | 1974  | 3.74175  |
| 55 | C | 1341  | 2.54189  |
| 55 | D | 1202  | 2.27841  |
| 55 | N | 1051  | 1.99219  |
| 55 | H | 901   | 1.70786  |
| 55 | L | 852   | 1.61498  |
| 55 | I | 546   | 1.03495  |
| 55 | Y | 542   | 1.02737  |
| 55 | F | 435   | 0.82455  |
| 55 | Q | 334   | 0.6331   |
| 55 | E | 225   | 0.42649  |
| 55 | M | 210   | 0.39806  |
| 55 | K | 54    | 0.10236  |
| 55 | W | 48    | 0.09098  |
| 55 | P | 21    | 0.03981  |
| 56 | I | 45050 | 85.30743 |
| 56 | V | 2686  | 5.08625  |
| 56 | L | 1272  | 2.40868  |
| 56 | T | 917   | 1.73645  |
| 56 | M | 860   | 1.62851  |
| 56 | S | 617   | 1.16836  |
| 56 | F | 546   | 1.03391  |
| 56 | A | 277   | 0.52453  |
| 56 | N | 107   | 0.20262  |
| 56 | C | 102   | 0.19315  |
| 56 | D | 93    | 0.17611  |
| 56 | H | 54    | 0.10226  |
| 56 | R | 49    | 0.09279  |
| 56 | Y | 42    | 0.07953  |
| 56 | W | 37    | 0.07006  |
| 56 | G | 32    | 0.0606   |
| 56 | Q | 25    | 0.04734  |
| 56 | E | 23    | 0.04355  |
| 56 | K | 12    | 0.02272  |
| 56 | P | 8     | 0.01515  |
| 57 | N | 20762 | 39.28551 |
| 57 | S | 7345  | 13.89809 |
| 57 | Y | 7304  | 13.82051 |



|    |   |       |          |
|----|---|-------|----------|
| 57 | D | 4256  | 8.05313  |
| 57 | T | 2648  | 5.0105   |
| 57 | H | 2174  | 4.11361  |
| 57 | R | 1248  | 2.36144  |
| 57 | A | 1239  | 2.34442  |
| 57 | G | 1022  | 1.93381  |
| 57 | K | 1005  | 1.90164  |
| 57 | L | 714   | 1.35102  |
| 57 | V | 711   | 1.34534  |
| 57 | E | 567   | 1.07287  |
| 57 | I | 550   | 1.0407   |
| 57 | F | 414   | 0.78336  |
| 57 | W | 353   | 0.66794  |
| 57 | Q | 163   | 0.30843  |
| 57 | M | 150   | 0.28383  |
| 57 | P | 114   | 0.21571  |
| 57 | C | 110   | 0.20814  |
| 58 | S | 25116 | 47.45852 |
| 58 | T | 5714  | 10.79702 |
| 58 | G | 4260  | 8.04958  |
| 58 | R | 3663  | 6.92151  |
| 58 | N | 2606  | 4.92423  |
| 58 | A | 2530  | 4.78062  |
| 58 | P | 1577  | 2.97986  |
| 58 | W | 1356  | 2.56226  |
| 58 | K | 1078  | 2.03696  |
| 58 | I | 920   | 1.73841  |
| 58 | D | 896   | 1.69306  |
| 58 | V | 609   | 1.15075  |
| 58 | M | 587   | 1.10918  |
| 58 | Y | 446   | 0.84275  |
| 58 | H | 370   | 0.69914  |
| 58 | E | 364   | 0.6878   |
| 58 | L | 329   | 0.62167  |
| 58 | F | 296   | 0.55931  |
| 58 | Q | 147   | 0.27777  |
| 58 | C | 58    | 0.1096   |
| 59 | G | 24189 | 45.64996 |
| 59 | D | 11380 | 21.47656 |
| 59 | A | 4334  | 8.17921  |
| 59 | S | 4175  | 7.87914  |
| 59 | R | 2024  | 3.81973  |
| 59 | T | 1266  | 2.38922  |
| 59 | N | 1208  | 2.27976  |
| 59 | V | 992   | 1.87212  |
| 59 | E | 729   | 1.37578  |

|    |   |       |          |
|----|---|-------|----------|
| 59 | Y | 598   | 1.12856  |
| 59 | P | 396   | 0.74734  |
| 59 | F | 394   | 0.74356  |
| 59 | L | 339   | 0.63977  |
| 59 | I | 286   | 0.53974  |
| 59 | H | 238   | 0.44916  |
| 59 | W | 159   | 0.30007  |
| 59 | M | 139   | 0.26232  |
| 59 | K | 75    | 0.14154  |
| 59 | Q | 54    | 0.10191  |
| 59 | C | 13    | 0.02453  |
| 60 | G | 42690 | 80.46367 |
| 60 | S | 3250  | 6.12572  |
| 60 | D | 3087  | 5.81849  |
| 60 | A | 1132  | 2.13363  |
| 60 | T | 576   | 1.08567  |
| 60 | V | 544   | 1.02535  |
| 60 | N | 389   | 0.7332   |
| 60 | R | 379   | 0.71435  |
| 60 | E | 278   | 0.52398  |
| 60 | L | 181   | 0.34116  |
| 60 | Y | 135   | 0.25445  |
| 60 | P | 110   | 0.20733  |
| 60 | I | 108   | 0.20356  |
| 60 | H | 56    | 0.10555  |
| 60 | F | 53    | 0.0999   |
| 60 | C | 34    | 0.06408  |
| 60 | Q | 15    | 0.02827  |
| 60 | K | 13    | 0.0245   |
| 60 | M | 13    | 0.0245   |
| 60 | W | 12    | 0.02262  |
| 61 | G | 21157 | 39.83019 |
| 61 | S | 11206 | 21.09643 |
| 61 | D | 5872  | 11.05463 |
| 61 | T | 4330  | 8.15166  |
| 61 | R | 2634  | 4.95877  |
| 61 | A | 1608  | 3.02722  |
| 61 | N | 1093  | 2.05768  |
| 61 | V | 1069  | 2.0125   |
| 61 | I | 965   | 1.81671  |
| 61 | E | 904   | 1.70187  |
| 61 | L | 374   | 0.70409  |
| 61 | K | 325   | 0.61185  |
| 61 | Y | 323   | 0.60808  |
| 61 | Q | 298   | 0.56102  |
| 61 | H | 290   | 0.54595  |

|    |    |       |          |
|----|----|-------|----------|
| 61 | F  | 283   | 0.53278  |
| 61 | M  | 166   | 0.31251  |
| 61 | P  | 120   | 0.22591  |
| 61 | W  | 62    | 0.11672  |
| 61 | C  | 39    | 0.07342  |
| 62 | S  | 17653 | 33.20043 |
| 62 | T  | 11213 | 21.08856 |
| 62 | N  | 5490  | 10.32518 |
| 62 | R  | 4683  | 8.80743  |
| 62 | I  | 2199  | 4.13571  |
| 62 | G  | 1802  | 3.38907  |
| 62 | A  | 1740  | 3.27246  |
| 62 | K  | 1581  | 2.97343  |
| 62 | D  | 1262  | 2.37347  |
| 62 | V  | 1186  | 2.23054  |
| 62 | Y  | 954   | 1.79421  |
| 62 | M  | 951   | 1.78857  |
| 62 | P  | 580   | 1.09082  |
| 62 | L  | 560   | 1.05321  |
| 62 | H  | 363   | 0.6827   |
| 62 | E  | 347   | 0.65261  |
| 62 | F  | 267   | 0.50215  |
| 62 | W  | 161   | 0.3028   |
| 62 | Q  | 141   | 0.26518  |
| 62 | C  | 38    | 0.07147  |
| 63 | T  | 38340 | 80.82128 |
| 63 | A  | 2595  | 5.4703   |
| 63 | I  | 1509  | 3.18099  |
| 63 | S  | 1313  | 2.76782  |
| 63 | P  | 1096  | 2.31038  |
| 63 | K  | 598   | 1.26059  |
| 63 | R  | 434   | 0.91488  |
| 63 | E  | 329   | 0.69354  |
| 63 | V  | 298   | 0.62819  |
| 63 | Q  | 256   | 0.53965  |
| 63 | L  | 238   | 0.50171  |
| 63 | M  | 149   | 0.31409  |
| 63 | G  | 78    | 0.16443  |
| 63 | D  | 70    | 0.14756  |
| 63 | N  | 67    | 0.14124  |
| 63 | F  | 25    | 0.0527   |
| 63 | Y  | 22    | 0.04638  |
| 63 | W  | 9     | 0.01897  |
| 63 | C  | 6     | 0.01265  |
| 63 | H  | 6     | 0.01265  |
| 63 | NA | 0     | 0        |

|    |    |       |          |
|----|----|-------|----------|
| 64 | NA | 0     | 0        |
| 65 | NA | 0     | 0        |
| 66 | Y  | 34791 | 65.23353 |
| 66 | F  | 3096  | 5.80504  |
| 66 | D  | 2778  | 5.20878  |
| 66 | N  | 1952  | 3.66002  |
| 66 | S  | 1646  | 3.08627  |
| 66 | H  | 1574  | 2.95127  |
| 66 | A  | 1288  | 2.41502  |
| 66 | T  | 1073  | 2.01189  |
| 66 | W  | 966   | 1.81126  |
| 66 | V  | 853   | 1.59938  |
| 66 | K  | 798   | 1.49626  |
| 66 | R  | 697   | 1.30688  |
| 66 | L  | 515   | 0.96563  |
| 66 | G  | 444   | 0.83251  |
| 66 | I  | 275   | 0.51563  |
| 66 | E  | 200   | 0.375    |
| 66 | Q  | 130   | 0.24375  |
| 66 | C  | 129   | 0.24188  |
| 66 | P  | 73    | 0.13688  |
| 66 | M  | 55    | 0.10313  |
| 67 | Y  | 49709 | 92.73202 |
| 67 | S  | 1517  | 2.82996  |
| 67 | V  | 352   | 0.65666  |
| 67 | H  | 350   | 0.65292  |
| 67 | F  | 341   | 0.63613  |
| 67 | C  | 247   | 0.46078  |
| 67 | T  | 211   | 0.39362  |
| 67 | L  | 169   | 0.31527  |
| 67 | D  | 156   | 0.29102  |
| 67 | A  | 148   | 0.27609  |
| 67 | N  | 128   | 0.23878  |
| 67 | I  | 110   | 0.2052   |
| 67 | E  | 57    | 0.10633  |
| 67 | G  | 36    | 0.06716  |
| 67 | K  | 16    | 0.02985  |
| 67 | Q  | 15    | 0.02798  |
| 67 | W  | 14    | 0.02612  |
| 67 | M  | 12    | 0.02239  |
| 67 | R  | 9     | 0.01679  |
| 67 | P  | 8     | 0.01492  |
| 68 | A  | 39815 | 73.82718 |
| 68 | S  | 3708  | 6.87558  |
| 68 | T  | 3095  | 5.73892  |
| 68 | V  | 1937  | 3.59169  |

|    |   |       |          |
|----|---|-------|----------|
| 68 | G | 1403  | 2.60152  |
| 68 | P | 929   | 1.7226   |
| 68 | R | 652   | 1.20897  |
| 68 | E | 552   | 1.02355  |
| 68 | L | 546   | 1.01242  |
| 68 | I | 432   | 0.80104  |
| 68 | K | 287   | 0.53217  |
| 68 | D | 203   | 0.37641  |
| 68 | Q | 202   | 0.37456  |
| 68 | H | 61    | 0.11311  |
| 68 | N | 56    | 0.10384  |
| 68 | M | 34    | 0.06304  |
| 68 | F | 7     | 0.01298  |
| 68 | Y | 6     | 0.01113  |
| 68 | C | 4     | 0.00742  |
| 68 | W | 1     | 0.00185  |
| 69 | D | 46873 | 86.61739 |
| 69 | E | 2228  | 4.11716  |
| 69 | N | 1810  | 3.34473  |
| 69 | G | 1139  | 2.10478  |
| 69 | A | 793   | 1.4654   |
| 69 | S | 258   | 0.47676  |
| 69 | V | 218   | 0.40285  |
| 69 | P | 206   | 0.38067  |
| 69 | H | 172   | 0.31784  |
| 69 | T | 149   | 0.27534  |
| 69 | R | 85    | 0.15707  |
| 69 | Y | 70    | 0.12935  |
| 69 | Q | 46    | 0.085    |
| 69 | K | 38    | 0.07022  |
| 69 | I | 13    | 0.02402  |
| 69 | L | 7     | 0.01294  |
| 69 | F | 6     | 0.01109  |
| 69 | M | 2     | 0.0037   |
| 69 | C | 1     | 0.00185  |
| 69 | W | 1     | 0.00185  |
| 70 | S | 51318 | 93.86352 |
| 70 | F | 1067  | 1.9516   |
| 70 | A | 704   | 1.28766  |
| 70 | P | 562   | 1.02793  |
| 70 | T | 330   | 0.60359  |
| 70 | Y | 207   | 0.37861  |
| 70 | V | 102   | 0.18656  |
| 70 | G | 95    | 0.17376  |
| 70 | D | 88    | 0.16096  |
| 70 | L | 54    | 0.09877  |

|    |    |       |          |
|----|----|-------|----------|
| 70 | H  | 45    | 0.08231  |
| 70 | I  | 36    | 0.06585  |
| 70 | N  | 26    | 0.04756  |
| 70 | C  | 13    | 0.02378  |
| 70 | R  | 12    | 0.02195  |
| 70 | Q  | 5     | 0.00915  |
| 70 | W  | 5     | 0.00915  |
| 70 | E  | 2     | 0.00366  |
| 70 | M  | 2     | 0.00366  |
| 71 | V  | 51270 | 93.2504  |
| 71 | M  | 1201  | 2.18439  |
| 71 | A  | 1025  | 1.86428  |
| 71 | L  | 936   | 1.70241  |
| 71 | I  | 167   | 0.30374  |
| 71 | E  | 111   | 0.20189  |
| 71 | T  | 75    | 0.13641  |
| 71 | G  | 66    | 0.12004  |
| 71 | K  | 36    | 0.06548  |
| 71 | R  | 25    | 0.04547  |
| 71 | F  | 24    | 0.04365  |
| 71 | P  | 20    | 0.03638  |
| 71 | S  | 9     | 0.01637  |
| 71 | W  | 6     | 0.01091  |
| 71 | Q  | 4     | 0.00728  |
| 71 | D  | 3     | 0.00546  |
| 71 | N  | 3     | 0.00546  |
| 72 | K  | 50540 | 91.81078 |
| 72 | R  | 1776  | 3.22628  |
| 72 | Q  | 814   | 1.47871  |
| 72 | E  | 735   | 1.3352   |
| 72 | N  | 278   | 0.50501  |
| 72 | T  | 236   | 0.42872  |
| 72 | M  | 198   | 0.35969  |
| 72 | A  | 109   | 0.19801  |
| 72 | L  | 105   | 0.19074  |
| 72 | S  | 88    | 0.15986  |
| 72 | V  | 66    | 0.1199   |
| 72 | D  | 30    | 0.0545   |
| 72 | G  | 25    | 0.04541  |
| 72 | H  | 18    | 0.0327   |
| 72 | W  | 11    | 0.01998  |
| 72 | I  | 10    | 0.01817  |
| 72 | P  | 5     | 0.00908  |
| 72 | Y  | 4     | 0.00727  |
| 73 | NA | 0     | 0        |
| 74 | G  | 53279 | 96.50769 |

|    |   |       |          |
|----|---|-------|----------|
| 74 | D | 1344  | 2.43447  |
| 74 | A | 236   | 0.42748  |
| 74 | S | 134   | 0.24272  |
| 74 | E | 64    | 0.11593  |
| 74 | V | 49    | 0.08876  |
| 74 | C | 42    | 0.07608  |
| 74 | R | 23    | 0.04166  |
| 74 | N | 14    | 0.02536  |
| 74 | Q | 8     | 0.01449  |
| 74 | F | 4     | 0.00725  |
| 74 | T | 4     | 0.00725  |
| 74 | Y | 3     | 0.00543  |
| 74 | H | 1     | 0.00181  |
| 74 | K | 1     | 0.00181  |
| 74 | L | 1     | 0.00181  |
| 75 | R | 54595 | 98.75014 |
| 75 | Q | 552   | 0.99844  |
| 75 | L | 56    | 0.10129  |
| 75 | P | 29    | 0.05245  |
| 75 | G | 19    | 0.03437  |
| 75 | H | 15    | 0.02713  |
| 75 | W | 7     | 0.01266  |
| 75 | K | 4     | 0.00724  |
| 75 | C | 3     | 0.00543  |
| 75 | S | 2     | 0.00362  |
| 75 | V | 2     | 0.00362  |
| 75 | E | 1     | 0.00181  |
| 75 | T | 1     | 0.00181  |
| 76 | F | 52797 | 95.44271 |
| 76 | L | 608   | 1.0991   |
| 76 | C | 580   | 1.04848  |
| 76 | S | 389   | 0.70321  |
| 76 | V | 371   | 0.67067  |
| 76 | A | 223   | 0.40312  |
| 76 | Y | 138   | 0.24947  |
| 76 | I | 125   | 0.22597  |
| 76 | T | 36    | 0.06508  |
| 76 | G | 20    | 0.03615  |
| 76 | N | 11    | 0.01989  |
| 76 | M | 7     | 0.01265  |
| 76 | P | 5     | 0.00904  |
| 76 | H | 3     | 0.00542  |
| 76 | R | 3     | 0.00542  |
| 76 | D | 1     | 0.00181  |
| 76 | W | 1     | 0.00181  |
| 77 | T | 51327 | 92.74008 |

|    |   |       |          |
|----|---|-------|----------|
| 77 | A | 2018  | 3.64622  |
| 77 | I | 827   | 1.49426  |
| 77 | S | 702   | 1.26841  |
| 77 | N | 122   | 0.22044  |
| 77 | V | 113   | 0.20417  |
| 77 | F | 57    | 0.10299  |
| 77 | R | 56    | 0.10118  |
| 77 | P | 33    | 0.05963  |
| 77 | L | 28    | 0.05059  |
| 77 | D | 23    | 0.04156  |
| 77 | G | 11    | 0.01988  |
| 77 | K | 10    | 0.01807  |
| 77 | H | 9     | 0.01626  |
| 77 | Y | 4     | 0.00723  |
| 77 | E | 2     | 0.00361  |
| 77 | M | 1     | 0.00181  |
| 77 | Q | 1     | 0.00181  |
| 77 | W | 1     | 0.00181  |
| 78 | I | 48122 | 86.92558 |
| 78 | V | 2860  | 5.16618  |
| 78 | M | 1841  | 3.32551  |
| 78 | T | 614   | 1.1091   |
| 78 | A | 546   | 0.98627  |
| 78 | L | 445   | 0.80383  |
| 78 | S | 271   | 0.48952  |
| 78 | F | 247   | 0.44617  |
| 78 | C | 173   | 0.3125   |
| 78 | N | 108   | 0.19509  |
| 78 | G | 107   | 0.19328  |
| 78 | D | 12    | 0.02168  |
| 78 | H | 6     | 0.01084  |
| 78 | K | 2     | 0.00361  |
| 78 | R | 2     | 0.00361  |
| 78 | Y | 2     | 0.00361  |
| 78 | P | 1     | 0.00181  |
| 78 | Q | 1     | 0.00181  |
| 79 | S | 52153 | 94.1917  |
| 79 | A | 1200  | 2.16728  |
| 79 | F | 662   | 1.19561  |
| 79 | T | 556   | 1.00417  |
| 79 | Y | 277   | 0.50028  |
| 79 | P | 250   | 0.45152  |
| 79 | D | 57    | 0.10295  |
| 79 | G | 44    | 0.07947  |
| 79 | V | 35    | 0.06321  |
| 79 | W | 31    | 0.05599  |



|    |   |       |          |
|----|---|-------|----------|
| 79 | L | 25    | 0.04515  |
| 79 | C | 18    | 0.03251  |
| 79 | N | 18    | 0.03251  |
| 79 | E | 13    | 0.02348  |
| 79 | H | 12    | 0.02167  |
| 79 | I | 10    | 0.01806  |
| 79 | R | 8     | 0.01445  |
| 80 | R | 46208 | 83.4456  |
| 80 | Q | 3505  | 6.32957  |
| 80 | K | 2568  | 4.63747  |
| 80 | I | 581   | 1.04921  |
| 80 | E | 568   | 1.02573  |
| 80 | G | 388   | 0.70068  |
| 80 | L | 328   | 0.59233  |
| 80 | S | 282   | 0.50926  |
| 80 | H | 232   | 0.41896  |
| 80 | T | 229   | 0.41354  |
| 80 | A | 200   | 0.36117  |
| 80 | V | 120   | 0.2167   |
| 80 | P | 42    | 0.07585  |
| 80 | Y | 35    | 0.06321  |
| 80 | N | 33    | 0.05959  |
| 80 | M | 32    | 0.05779  |
| 80 | W | 11    | 0.01986  |
| 80 | F | 8     | 0.01445  |
| 80 | D | 3     | 0.00542  |
| 80 | C | 2     | 0.00361  |
| 81 | D | 53198 | 96.06342 |
| 81 | G | 607   | 1.0961   |
| 81 | N | 503   | 0.9083   |
| 81 | A | 237   | 0.42797  |
| 81 | E | 221   | 0.39908  |
| 81 | V | 217   | 0.39185  |
| 81 | Y | 156   | 0.2817   |
| 81 | S | 77    | 0.13904  |
| 81 | H | 58    | 0.10473  |
| 81 | T | 31    | 0.05598  |
| 81 | R | 26    | 0.04695  |
| 81 | W | 20    | 0.03612  |
| 81 | I | 9     | 0.01625  |
| 81 | F | 6     | 0.01083  |
| 81 | L | 4     | 0.00722  |
| 81 | Q | 3     | 0.00542  |
| 81 | K | 2     | 0.00361  |
| 81 | P | 2     | 0.00361  |
| 81 | C | 1     | 0.00181  |

|    |   |       |          |
|----|---|-------|----------|
| 82 | N | 47480 | 85.73492 |
| 82 | D | 2573  | 4.64608  |
| 82 | S | 2046  | 3.69447  |
| 82 | Y | 546   | 0.98592  |
| 82 | K | 543   | 0.9805   |
| 82 | T | 521   | 0.94077  |
| 82 | V | 492   | 0.88841  |
| 82 | I | 353   | 0.63741  |
| 82 | H | 218   | 0.39364  |
| 82 | A | 215   | 0.38823  |
| 82 | G | 138   | 0.24919  |
| 82 | R | 122   | 0.2203   |
| 82 | L | 37    | 0.06681  |
| 82 | M | 33    | 0.05959  |
| 82 | E | 24    | 0.04334  |
| 82 | F | 24    | 0.04334  |
| 82 | Q | 7     | 0.01264  |
| 82 | P | 6     | 0.01083  |
| 82 | W | 2     | 0.00361  |
| 83 | A | 48452 | 87.48217 |
| 83 | T | 2252  | 4.06608  |
| 83 | S | 1105  | 1.99513  |
| 83 | D | 980   | 1.76943  |
| 83 | G | 839   | 1.51485  |
| 83 | V | 790   | 1.42638  |
| 83 | P | 248   | 0.44777  |
| 83 | R | 186   | 0.33583  |
| 83 | N | 157   | 0.28347  |
| 83 | I | 77    | 0.13903  |
| 83 | Y | 66    | 0.11917  |
| 83 | F | 59    | 0.10653  |
| 83 | E | 57    | 0.10292  |
| 83 | L | 51    | 0.09208  |
| 83 | H | 35    | 0.06319  |
| 83 | Q | 15    | 0.02708  |
| 83 | M | 11    | 0.01986  |
| 83 | K | 3     | 0.00542  |
| 83 | W | 2     | 0.00361  |
| 84 | K | 48491 | 87.55101 |
| 84 | E | 2513  | 4.53725  |
| 84 | R | 1350  | 2.43744  |
| 84 | N | 996   | 1.79829  |
| 84 | Q | 786   | 1.41913  |
| 84 | A | 323   | 0.58318  |
| 84 | M | 192   | 0.34666  |
| 84 | G | 144   | 0.25999  |

|    |   |       |          |
|----|---|-------|----------|
| 84 | T | 144   | 0.25999  |
| 84 | L | 140   | 0.25277  |
| 84 | D | 121   | 0.21847  |
| 84 | V | 77    | 0.13902  |
| 84 | S | 40    | 0.07222  |
| 84 | H | 21    | 0.03792  |
| 84 | I | 18    | 0.0325   |
| 84 | W | 15    | 0.02708  |
| 84 | Y | 9     | 0.01625  |
| 84 | P | 6     | 0.01083  |
| 85 | N | 49166 | 88.76973 |
| 85 | S | 2281  | 4.11837  |
| 85 | D | 1028  | 1.85606  |
| 85 | K | 1027  | 1.85426  |
| 85 | T | 528   | 0.95331  |
| 85 | R | 418   | 0.7547   |
| 85 | Y | 193   | 0.34846  |
| 85 | G | 162   | 0.29249  |
| 85 | A | 125   | 0.22569  |
| 85 | H | 125   | 0.22569  |
| 85 | I | 82    | 0.14805  |
| 85 | L | 75    | 0.13541  |
| 85 | E | 46    | 0.08305  |
| 85 | M | 38    | 0.06861  |
| 85 | Q | 31    | 0.05597  |
| 85 | V | 25    | 0.04514  |
| 85 | F | 15    | 0.02708  |
| 85 | P | 15    | 0.02708  |
| 85 | C | 5     | 0.00903  |
| 85 | W | 1     | 0.00181  |
| 86 | T | 47312 | 85.42231 |
| 86 | M | 4150  | 7.49287  |
| 86 | A | 1436  | 2.59271  |
| 86 | I | 665   | 1.20066  |
| 86 | S | 471   | 0.8504   |
| 86 | V | 428   | 0.77276  |
| 86 | L | 303   | 0.54707  |
| 86 | E | 205   | 0.37013  |
| 86 | R | 197   | 0.35569  |
| 86 | K | 127   | 0.2293   |
| 86 | P | 27    | 0.04875  |
| 86 | Q | 23    | 0.04153  |
| 86 | N | 19    | 0.0343   |
| 86 | G | 11    | 0.01986  |
| 86 | H | 8     | 0.01444  |
| 86 | W | 3     | 0.00542  |

|    |   |       |          |
|----|---|-------|----------|
| 86 | F | 1     | 0.00181  |
| 87 | L | 29880 | 53.9506  |
| 87 | V | 21664 | 39.11599 |
| 87 | M | 1577  | 2.84739  |
| 87 | A | 963   | 1.73877  |
| 87 | I | 419   | 0.75654  |
| 87 | F | 151   | 0.27264  |
| 87 | Q | 130   | 0.23472  |
| 87 | T | 122   | 0.22028  |
| 87 | G | 121   | 0.21847  |
| 87 | P | 117   | 0.21125  |
| 87 | H | 74    | 0.13361  |
| 87 | W | 67    | 0.12097  |
| 87 | E | 41    | 0.07403  |
| 87 | S | 28    | 0.05056  |
| 87 | R | 18    | 0.0325   |
| 87 | N | 6     | 0.01083  |
| 87 | Y | 3     | 0.00542  |
| 87 | C | 2     | 0.00361  |
| 87 | D | 1     | 0.00181  |
| 88 | Y | 48617 | 87.78642 |
| 88 | F | 1706  | 3.08048  |
| 88 | S | 1566  | 2.82768  |
| 88 | H | 809   | 1.46079  |
| 88 | D | 596   | 1.07618  |
| 88 | T | 583   | 1.05271  |
| 88 | N | 424   | 0.76561  |
| 88 | W | 282   | 0.5092   |
| 88 | L | 194   | 0.3503   |
| 88 | I | 151   | 0.27266  |
| 88 | C | 143   | 0.25821  |
| 88 | A | 136   | 0.24557  |
| 88 | V | 114   | 0.20585  |
| 88 | R | 18    | 0.0325   |
| 88 | Q | 12    | 0.02167  |
| 88 | G | 10    | 0.01806  |
| 88 | E | 9     | 0.01625  |
| 88 | P | 9     | 0.01625  |
| 88 | M | 2     | 0.00361  |
| 89 | L | 54614 | 98.61505 |
| 89 | P | 253   | 0.45684  |
| 89 | V | 175   | 0.31599  |
| 89 | Q | 146   | 0.26363  |
| 89 | M | 99    | 0.17876  |
| 89 | R | 32    | 0.05778  |
| 89 | I | 23    | 0.04153  |

|    |   |       |          |
|----|---|-------|----------|
| 89 | S | 18    | 0.0325   |
| 89 | H | 9     | 0.01625  |
| 89 | F | 7     | 0.01264  |
| 89 | W | 2     | 0.00361  |
| 89 | A | 1     | 0.00181  |
| 89 | G | 1     | 0.00181  |
| 89 | T | 1     | 0.00181  |
| 90 | Q | 50078 | 90.42288 |
| 90 | E | 1884  | 3.40183  |
| 90 | H | 1243  | 2.24441  |
| 90 | R | 1194  | 2.15594  |
| 90 | L | 401   | 0.72406  |
| 90 | D | 157   | 0.28349  |
| 90 | T | 95    | 0.17154  |
| 90 | K | 80    | 0.14445  |
| 90 | S | 60    | 0.10834  |
| 90 | G | 53    | 0.0957   |
| 90 | V | 34    | 0.06139  |
| 90 | A | 32    | 0.05778  |
| 90 | I | 26    | 0.04695  |
| 90 | P | 17    | 0.0307   |
| 90 | N | 14    | 0.02528  |
| 90 | Y | 7     | 0.01264  |
| 90 | M | 3     | 0.00542  |
| 90 | F | 2     | 0.00361  |
| 90 | W | 2     | 0.00361  |
| 91 | M | 32490 | 58.66633 |
| 91 | L | 21391 | 38.62516 |
| 91 | I | 597   | 1.07799  |
| 91 | V | 441   | 0.7963   |
| 91 | T | 173   | 0.31238  |
| 91 | S | 131   | 0.23654  |
| 91 | F | 62    | 0.11195  |
| 91 | K | 44    | 0.07945  |
| 91 | A | 21    | 0.03792  |
| 91 | R | 9     | 0.01625  |
| 91 | W | 7     | 0.01264  |
| 91 | Q | 6     | 0.01083  |
| 91 | P | 5     | 0.00903  |
| 91 | G | 3     | 0.00542  |
| 91 | N | 1     | 0.00181  |
| 92 | N | 46282 | 83.57018 |
| 92 | D | 3060  | 5.52536  |
| 92 | S | 2094  | 3.78108  |
| 92 | T | 1204  | 2.17403  |
| 92 | I | 726   | 1.31092  |

|    |   |       |          |
|----|---|-------|----------|
| 92 | K | 541   | 0.97687  |
| 92 | H | 344   | 0.62115  |
| 92 | L | 208   | 0.37558  |
| 92 | Y | 188   | 0.33947  |
| 92 | V | 167   | 0.30155  |
| 92 | R | 162   | 0.29252  |
| 92 | A | 114   | 0.20585  |
| 92 | M | 99    | 0.17876  |
| 92 | G | 97    | 0.17515  |
| 92 | E | 59    | 0.10653  |
| 92 | F | 24    | 0.04334  |
| 92 | P | 5     | 0.00903  |
| 92 | C | 3     | 0.00542  |
| 92 | Q | 2     | 0.00361  |
| 92 | W | 2     | 0.00361  |
| 93 | S | 45203 | 81.62186 |
| 93 | N | 4731  | 8.54264  |
| 93 | G | 1356  | 2.44849  |
| 93 | D | 1018  | 1.83818  |
| 93 | R | 789   | 1.42468  |
| 93 | T | 755   | 1.36328  |
| 93 | V | 411   | 0.74213  |
| 93 | A | 374   | 0.67532  |
| 93 | M | 141   | 0.2546   |
| 93 | Y | 115   | 0.20765  |
| 93 | I | 111   | 0.20043  |
| 93 | K | 91    | 0.16432  |
| 93 | C | 71    | 0.1282   |
| 93 | L | 66    | 0.11917  |
| 93 | F | 33    | 0.05959  |
| 93 | E | 30    | 0.05417  |
| 93 | H | 28    | 0.05056  |
| 93 | W | 28    | 0.05056  |
| 93 | Q | 21    | 0.03792  |
| 93 | P | 9     | 0.01625  |
| 94 | L | 53723 | 97.00619 |
| 94 | V | 849   | 1.53302  |
| 94 | P | 352   | 0.6356   |
| 94 | M | 199   | 0.35933  |
| 94 | Q | 108   | 0.19501  |
| 94 | A | 54    | 0.09751  |
| 94 | R | 36    | 0.065    |
| 94 | T | 22    | 0.03972  |
| 94 | I | 13    | 0.02347  |
| 94 | F | 8     | 0.01445  |
| 94 | H | 6     | 0.01083  |

|    |   |       |          |
|----|---|-------|----------|
| 94 | S | 4     | 0.00722  |
| 94 | E | 3     | 0.00542  |
| 94 | G | 3     | 0.00542  |
| 94 | K | 1     | 0.00181  |
| 95 | K | 45895 | 82.87138 |
| 95 | E | 2340  | 4.22528  |
| 95 | R | 2252  | 4.06638  |
| 95 | Q | 1395  | 2.51891  |
| 95 | T | 1270  | 2.29321  |
| 95 | N | 1085  | 1.95916  |
| 95 | S | 318   | 0.5742   |
| 95 | I | 246   | 0.4442   |
| 95 | A | 112   | 0.20224  |
| 95 | G | 108   | 0.19501  |
| 95 | V | 93    | 0.16793  |
| 95 | H | 66    | 0.11917  |
| 95 | D | 65    | 0.11737  |
| 95 | M | 62    | 0.11195  |
| 95 | L | 60    | 0.10834  |
| 95 | Y | 12    | 0.02167  |
| 95 | P | 2     | 0.00361  |
| 96 | T | 22922 | 41.38965 |
| 96 | P | 16842 | 30.41115 |
| 96 | S | 10199 | 18.41606 |
| 96 | I | 1912  | 3.45245  |
| 96 | A | 1646  | 2.97214  |
| 96 | V | 467   | 0.84325  |
| 96 | L | 369   | 0.66629  |
| 96 | F | 341   | 0.61573  |
| 96 | R | 140   | 0.25279  |
| 96 | N | 133   | 0.24015  |
| 96 | G | 111   | 0.20043  |
| 96 | H | 75    | 0.13543  |
| 96 | D | 70    | 0.1264   |
| 96 | Y | 67    | 0.12098  |
| 96 | Q | 33    | 0.05959  |
| 96 | K | 22    | 0.03972  |
| 96 | E | 13    | 0.02347  |
| 96 | M | 13    | 0.02347  |
| 96 | C | 3     | 0.00542  |
| 96 | W | 3     | 0.00542  |
| 97 | E | 49386 | 89.17499 |
| 97 | D | 4246  | 7.66689  |
| 97 | G | 806   | 1.45537  |
| 97 | A | 284   | 0.51281  |
| 97 | K | 133   | 0.24015  |

|     |   |       |          |
|-----|---|-------|----------|
| 97  | S | 132   | 0.23835  |
| 97  | V | 131   | 0.23654  |
| 97  | N | 90    | 0.16251  |
| 97  | Q | 82    | 0.14807  |
| 97  | W | 35    | 0.0632   |
| 97  | T | 15    | 0.02709  |
| 97  | R | 12    | 0.02167  |
| 97  | L | 11    | 0.01986  |
| 97  | M | 7     | 0.01264  |
| 97  | P | 5     | 0.00903  |
| 97  | I | 3     | 0.00542  |
| 97  | Y | 3     | 0.00542  |
| 98  | D | 54862 | 99.06286 |
| 98  | G | 224   | 0.40447  |
| 98  | N | 87    | 0.15709  |
| 98  | E | 80    | 0.14445  |
| 98  | V | 72    | 0.13001  |
| 98  | Y | 23    | 0.04153  |
| 98  | H | 22    | 0.03972  |
| 98  | A | 10    | 0.01806  |
| 98  | R | 1     | 0.00181  |
| 99  | T | 44486 | 80.3446  |
| 99  | M | 8129  | 14.6815  |
| 99  | S | 1154  | 2.0842   |
| 99  | A | 1082  | 1.95416  |
| 99  | V | 131   | 0.23659  |
| 99  | G | 118   | 0.21312  |
| 99  | I | 57    | 0.10295  |
| 99  | K | 48    | 0.08669  |
| 99  | L | 45    | 0.08127  |
| 99  | R | 44    | 0.07947  |
| 99  | Q | 29    | 0.05238  |
| 99  | P | 17    | 0.0307   |
| 99  | E | 15    | 0.02709  |
| 99  | W | 10    | 0.01806  |
| 99  | N | 3     | 0.00542  |
| 99  | D | 1     | 0.00181  |
| 100 | A | 51421 | 92.87133 |
| 100 | G | 3266  | 5.89871  |
| 100 | S | 342   | 0.61769  |
| 100 | V | 129   | 0.23299  |
| 100 | T | 117   | 0.21131  |
| 100 | D | 60    | 0.10837  |
| 100 | P | 15    | 0.02709  |
| 100 | N | 8     | 0.01445  |
| 100 | F | 6     | 0.01084  |



|     |   |       |          |
|-----|---|-------|----------|
| 100 | C | 2     | 0.00361  |
| 100 | R | 1     | 0.00181  |
| 100 | Y | 1     | 0.00181  |
| 101 | M | 27180 | 49.08973 |
| 101 | V | 13305 | 24.03013 |
| 101 | L | 8992  | 16.24043 |
| 101 | I | 1847  | 3.33586  |
| 101 | T | 1697  | 3.06495  |
| 101 | R | 883   | 1.59478  |
| 101 | K | 321   | 0.57976  |
| 101 | A | 245   | 0.44249  |
| 101 | Q | 242   | 0.43708  |
| 101 | E | 201   | 0.36303  |
| 101 | S | 113   | 0.20409  |
| 101 | D | 85    | 0.15352  |
| 101 | H | 75    | 0.13546  |
| 101 | P | 60    | 0.10837  |
| 101 | W | 47    | 0.08489  |
| 101 | N | 41    | 0.07405  |
| 101 | G | 26    | 0.04696  |
| 101 | F | 6     | 0.01084  |
| 101 | C | 1     | 0.00181  |
| 101 | Y | 1     | 0.00181  |
| 102 | Y | 54601 | 98.62007 |
| 102 | F | 261   | 0.47142  |
| 102 | C | 200   | 0.36124  |
| 102 | H | 189   | 0.34137  |
| 102 | N | 58    | 0.10476  |
| 102 | I | 20    | 0.03612  |
| 102 | W | 10    | 0.01806  |
| 102 | D | 9     | 0.01626  |
| 102 | L | 9     | 0.01626  |
| 102 | S | 5     | 0.00903  |
| 102 | Q | 2     | 0.00361  |
| 102 | R | 1     | 0.00181  |
| 103 | Y | 49334 | 89.12615 |
| 103 | F | 3577  | 6.46216  |
| 103 | H | 1181  | 2.13358  |
| 103 | S | 350   | 0.63231  |
| 103 | W | 175   | 0.31615  |
| 103 | C | 154   | 0.27821  |
| 103 | I | 102   | 0.18427  |
| 103 | L | 102   | 0.18427  |
| 103 | R | 93    | 0.16801  |
| 103 | T | 83    | 0.14995  |
| 103 | V | 73    | 0.13188  |

|     |   |       |          |
|-----|---|-------|----------|
| 103 | N | 67    | 0.12104  |
| 103 | K | 21    | 0.03794  |
| 103 | A | 14    | 0.02529  |
| 103 | M | 9     | 0.01626  |
| 103 | D | 7     | 0.01265  |
| 103 | E | 6     | 0.01084  |
| 103 | P | 4     | 0.00723  |
| 103 | Q | 1     | 0.00181  |
| 104 | C | 55264 | 99.84643 |
| 104 | R | 47    | 0.08492  |
| 104 | S | 19    | 0.03433  |
| 104 | Y | 9     | 0.01626  |
| 104 | W | 6     | 0.01084  |
| 104 | F | 4     | 0.00723  |
| 105 | A | 1122  | 94.28571 |
| 105 | T | 27    | 2.26891  |
| 105 | V | 26    | 2.18487  |
| 105 | G | 7     | 0.58824  |
| 105 | S | 6     | 0.5042   |
| 105 | D | 1     | 0.08403  |
| 105 | E | 1     | 0.08403  |
| 106 | A | 289   | 67.52336 |
| 106 | K | 60    | 14.01869 |
| 106 | R | 27    | 6.30841  |
| 106 | G | 18    | 4.20561  |
| 106 | V | 11    | 2.57009  |
| 106 | L | 6     | 1.40187  |
| 106 | E | 5     | 1.16822  |
| 106 | P | 4     | 0.93458  |
| 106 | I | 2     | 0.46729  |
| 106 | S | 2     | 0.46729  |
| 106 | T | 2     | 0.46729  |
| 106 | C | 1     | 0.23364  |
| 106 | Q | 1     | 0.23364  |

**Table S6: 2-VHH**

| The positions of amino acids | Amino acids | Counts | Percentage(%) |
|------------------------------|-------------|--------|---------------|
| 1                            | H           | 26226  | 67.51274      |
| 1                            | D           | 7668   | 19.73948      |
| 1                            | Q           | 3479   | 8.95588       |
| 1                            | E           | 645    | 1.6604        |
| 1                            | S           | 325    | 0.83664       |
| 1                            | M           | 151    | 0.38871       |
| 1                            | L           | 86     | 0.22139       |
| 1                            | P           | 79     | 0.20337       |
| 1                            | A           | 57     | 0.14673       |
| 1                            | Y           | 50     | 0.12871       |
| 1                            | N           | 22     | 0.05663       |
| 1                            | R           | 16     | 0.04119       |
| 1                            | G           | 10     | 0.02574       |
| 1                            | W           | 10     | 0.02574       |
| 1                            | V           | 8      | 0.02059       |
| 1                            | C           | 5      | 0.01287       |
| 1                            | K           | 3      | 0.00772       |
| 1                            | T           | 3      | 0.00772       |
| 1                            | I           | 2      | 0.00515       |
| 1                            | F           | 1      | 0.00257       |
| 2                            | V           | 38373  | 98.463        |
| 2                            | C           | 262    | 0.67228       |
| 2                            | M           | 88     | 0.2258        |
| 2                            | L           | 64     | 0.16422       |
| 2                            | W           | 47     | 0.1206        |
| 2                            | G           | 46     | 0.11803       |
| 2                            | A           | 43     | 0.11034       |
| 2                            | H           | 13     | 0.03336       |
| 2                            | E           | 12     | 0.03079       |
| 2                            | D           | 11     | 0.02823       |
| 2                            | S           | 7      | 0.01796       |
| 2                            | R           | 4      | 0.01026       |
| 2                            | F           | 1      | 0.00257       |
| 2                            | Q           | 1      | 0.00257       |
| 3                            | Q           | 40871  | 98.90857      |
| 3                            | A           | 195    | 0.4719        |
| 3                            | S           | 51     | 0.12342       |
| 3                            | P           | 47     | 0.11374       |
| 3                            | C           | 32     | 0.07744       |
| 3                            | R           | 30     | 0.0726        |
| 3                            | V           | 29     | 0.07018       |
| 3                            | L           | 21     | 0.05082       |
| 3                            | E           | 12     | 0.02904       |

|   |   |       |          |
|---|---|-------|----------|
| 3 | H | 11    | 0.02662  |
| 3 | K | 10    | 0.0242   |
| 3 | W | 7     | 0.01694  |
| 3 | G | 4     | 0.00968  |
| 3 | M | 1     | 0.00242  |
| 3 | T | 1     | 0.00242  |
| 4 | L | 41241 | 99.17516 |
| 4 | A | 146   | 0.3511   |
| 4 | W | 43    | 0.10341  |
| 4 | Q | 36    | 0.08657  |
| 4 | P | 28    | 0.06733  |
| 4 | S | 25    | 0.06012  |
| 4 | M | 24    | 0.05771  |
| 4 | V | 24    | 0.05771  |
| 4 | R | 9     | 0.02164  |
| 4 | E | 3     | 0.00721  |
| 4 | C | 2     | 0.00481  |
| 4 | F | 1     | 0.0024   |
| 4 | G | 1     | 0.0024   |
| 4 | H | 1     | 0.0024   |
| 5 | V | 41638 | 99.36759 |
| 5 | G | 125   | 0.29831  |
| 5 | W | 44    | 0.105    |
| 5 | L | 25    | 0.05966  |
| 5 | A | 23    | 0.05489  |
| 5 | E | 21    | 0.05012  |
| 5 | M | 16    | 0.03818  |
| 5 | S | 4     | 0.00955  |
| 5 | T | 3     | 0.00716  |
| 5 | F | 2     | 0.00477  |
| 5 | R | 2     | 0.00477  |
| 6 | E | 41764 | 99.43099 |
| 6 | G | 96    | 0.22856  |
| 6 | A | 41    | 0.09761  |
| 6 | S | 26    | 0.0619   |
| 6 | V | 23    | 0.05476  |
| 6 | M | 12    | 0.02857  |
| 6 | W | 11    | 0.02619  |
| 6 | D | 10    | 0.02381  |
| 6 | K | 9     | 0.02143  |
| 6 | Q | 7     | 0.01667  |
| 6 | R | 3     | 0.00714  |
| 6 | C | 1     | 0.00238  |
| 7 | S | 41877 | 99.55071 |
| 7 | V | 57    | 0.1355   |
| 7 | F | 30    | 0.07132  |

|    |    |       |          |
|----|----|-------|----------|
| 7  | Y  | 29    | 0.06894  |
| 7  | L  | 20    | 0.04754  |
| 7  | A  | 19    | 0.04517  |
| 7  | P  | 16    | 0.03804  |
| 7  | T  | 7     | 0.01664  |
| 7  | C  | 4     | 0.00951  |
| 7  | G  | 4     | 0.00951  |
| 7  | E  | 1     | 0.00238  |
| 7  | R  | 1     | 0.00238  |
| 7  | W  | 1     | 0.00238  |
| 8  | G  | 41963 | 99.66985 |
| 8  | W  | 68    | 0.16151  |
| 8  | E  | 21    | 0.04988  |
| 8  | R  | 15    | 0.03563  |
| 8  | L  | 11    | 0.02613  |
| 8  | V  | 8     | 0.019    |
| 8  | D  | 7     | 0.01663  |
| 8  | H  | 5     | 0.01188  |
| 8  | C  | 2     | 0.00475  |
| 8  | P  | 1     | 0.00238  |
| 8  | Q  | 1     | 0.00238  |
| 9  | G  | 41879 | 99.3382  |
| 9  | E  | 69    | 0.16367  |
| 9  | A  | 68    | 0.1613   |
| 9  | R  | 65    | 0.15418  |
| 9  | V  | 42    | 0.09963  |
| 9  | M  | 19    | 0.04507  |
| 9  | D  | 7     | 0.0166   |
| 9  | S  | 3     | 0.00712  |
| 9  | W  | 3     | 0.00712  |
| 9  | L  | 1     | 0.00237  |
| 9  | P  | 1     | 0.00237  |
| 9  | Q  | 1     | 0.00237  |
| 10 | NA | 0     | 0        |
| 11 | G  | 39389 | 93.34107 |
| 11 | D  | 1678  | 3.9764   |
| 11 | A  | 592   | 1.40288  |
| 11 | E  | 118   | 0.27963  |
| 11 | S  | 108   | 0.25593  |
| 11 | R  | 101   | 0.23934  |
| 11 | N  | 83    | 0.19669  |
| 11 | T  | 46    | 0.10901  |
| 11 | V  | 32    | 0.07583  |
| 11 | C  | 22    | 0.05213  |
| 11 | Q  | 17    | 0.04029  |
| 11 | K  | 4     | 0.00948  |

|    |   |       |          |
|----|---|-------|----------|
| 11 | W | 3     | 0.00711  |
| 11 | H | 2     | 0.00474  |
| 11 | L | 2     | 0.00474  |
| 11 | F | 1     | 0.00237  |
| 11 | Y | 1     | 0.00237  |
| 12 | S | 38969 | 92.29111 |
| 12 | L | 1149  | 2.7212   |
| 12 | T | 781   | 1.84966  |
| 12 | A | 706   | 1.67203  |
| 12 | P | 348   | 0.82418  |
| 12 | E | 76    | 0.17999  |
| 12 | V | 54    | 0.12789  |
| 12 | W | 30    | 0.07105  |
| 12 | M | 22    | 0.0521   |
| 12 | I | 18    | 0.04263  |
| 12 | Q | 18    | 0.04263  |
| 12 | F | 17    | 0.04026  |
| 12 | H | 12    | 0.02842  |
| 12 | D | 9     | 0.02131  |
| 12 | Y | 5     | 0.01184  |
| 12 | K | 3     | 0.0071   |
| 12 | R | 3     | 0.0071   |
| 12 | C | 2     | 0.00474  |
| 12 | G | 2     | 0.00474  |
| 13 | V | 40763 | 96.49875 |
| 13 | A | 1085  | 2.56853  |
| 13 | E | 112   | 0.26514  |
| 13 | M | 112   | 0.26514  |
| 13 | L | 53    | 0.12547  |
| 13 | I | 48    | 0.11363  |
| 13 | G | 46    | 0.1089   |
| 13 | Q | 5     | 0.01184  |
| 13 | R | 5     | 0.01184  |
| 13 | C | 4     | 0.00947  |
| 13 | D | 3     | 0.0071   |
| 13 | T | 3     | 0.0071   |
| 13 | P | 2     | 0.00473  |
| 13 | K | 1     | 0.00237  |
| 14 | Q | 38468 | 91.01836 |
| 14 | E | 2009  | 4.75345  |
| 14 | R | 494   | 1.16884  |
| 14 | P | 286   | 0.6767   |
| 14 | L | 248   | 0.58679  |
| 14 | H | 216   | 0.51107  |
| 14 | K | 196   | 0.46375  |
| 14 | S | 85    | 0.20112  |

|    |   |       |          |
|----|---|-------|----------|
| 14 | A | 69    | 0.16326  |
| 14 | N | 49    | 0.11594  |
| 14 | T | 49    | 0.11594  |
| 14 | D | 28    | 0.06625  |
| 14 | V | 22    | 0.05205  |
| 14 | M | 18    | 0.04259  |
| 14 | G | 13    | 0.03076  |
| 14 | W | 6     | 0.0142   |
| 14 | C | 4     | 0.00946  |
| 14 | F | 4     | 0.00946  |
| 15 | A | 32863 | 77.72154 |
| 15 | P | 3678  | 8.69853  |
| 15 | T | 2929  | 6.92713  |
| 15 | V | 1210  | 2.86167  |
| 15 | S | 847   | 2.00317  |
| 15 | D | 289   | 0.68349  |
| 15 | I | 104   | 0.24596  |
| 15 | G | 103   | 0.2436   |
| 15 | E | 70    | 0.16555  |
| 15 | N | 51    | 0.12062  |
| 15 | H | 40    | 0.0946   |
| 15 | R | 38    | 0.08987  |
| 15 | L | 23    | 0.0544   |
| 15 | F | 20    | 0.0473   |
| 15 | Q | 8     | 0.01892  |
| 15 | Y | 8     | 0.01892  |
| 15 | C | 1     | 0.00237  |
| 15 | K | 1     | 0.00237  |
| 16 | G | 41894 | 99.03317 |
| 16 | E | 193   | 0.45623  |
| 16 | R | 77    | 0.18202  |
| 16 | A | 41    | 0.09692  |
| 16 | T | 35    | 0.08274  |
| 16 | D | 22    | 0.05201  |
| 16 | V | 21    | 0.04964  |
| 16 | S | 6     | 0.01418  |
| 16 | W | 5     | 0.01182  |
| 16 | K | 4     | 0.00946  |
| 16 | Q | 2     | 0.00473  |
| 16 | H | 1     | 0.00236  |
| 16 | L | 1     | 0.00236  |
| 16 | N | 1     | 0.00236  |
| 17 | G | 39992 | 94.48343 |
| 17 | E | 1410  | 3.33121  |
| 17 | R | 307   | 0.72531  |
| 17 | D | 167   | 0.39455  |

|    |   |       |          |
|----|---|-------|----------|
| 17 | A | 133   | 0.31422  |
| 17 | V | 68    | 0.16065  |
| 17 | S | 67    | 0.15829  |
| 17 | Q | 55    | 0.12994  |
| 17 | T | 37    | 0.08741  |
| 17 | W | 30    | 0.07088  |
| 17 | N | 26    | 0.06143  |
| 17 | K | 24    | 0.0567   |
| 17 | M | 6     | 0.01418  |
| 17 | C | 2     | 0.00473  |
| 17 | Y | 2     | 0.00473  |
| 17 | I | 1     | 0.00236  |
| 18 | S | 41144 | 97.1202  |
| 18 | T | 528   | 1.24634  |
| 18 | A | 237   | 0.55944  |
| 18 | P | 185   | 0.43669  |
| 18 | F | 100   | 0.23605  |
| 18 | D | 44    | 0.10386  |
| 18 | N | 28    | 0.06609  |
| 18 | Y | 25    | 0.05901  |
| 18 | H | 24    | 0.05665  |
| 18 | G | 16    | 0.03777  |
| 18 | R | 9     | 0.02124  |
| 18 | V | 7     | 0.01652  |
| 18 | C | 5     | 0.0118   |
| 18 | M | 4     | 0.00944  |
| 18 | L | 3     | 0.00708  |
| 18 | I | 2     | 0.00472  |
| 18 | E | 1     | 0.00236  |
| 18 | Q | 1     | 0.00236  |
| 18 | W | 1     | 0.00236  |
| 19 | L | 41469 | 97.84117 |
| 19 | V | 232   | 0.54738  |
| 19 | R | 179   | 0.42233  |
| 19 | P | 173   | 0.40817  |
| 19 | M | 172   | 0.40581  |
| 19 | Q | 80    | 0.18875  |
| 19 | A | 20    | 0.04719  |
| 19 | H | 18    | 0.04247  |
| 19 | T | 18    | 0.04247  |
| 19 | S | 6     | 0.01416  |
| 19 | I | 5     | 0.0118   |
| 19 | F | 4     | 0.00944  |
| 19 | G | 3     | 0.00708  |
| 19 | K | 2     | 0.00472  |
| 19 | N | 2     | 0.00472  |



|    |   |       |          |
|----|---|-------|----------|
| 19 | E | 1     | 0.00236  |
| 20 | R | 33566 | 79.15203 |
| 20 | T | 4261  | 10.04787 |
| 20 | K | 2694  | 6.35272  |
| 20 | S | 633   | 1.49268  |
| 20 | N | 400   | 0.94324  |
| 20 | G | 244   | 0.57538  |
| 20 | I | 204   | 0.48105  |
| 20 | E | 75    | 0.17686  |
| 20 | M | 69    | 0.16271  |
| 20 | Q | 63    | 0.14856  |
| 20 | A | 60    | 0.14149  |
| 20 | L | 45    | 0.10611  |
| 20 | V | 37    | 0.08725  |
| 20 | W | 18    | 0.04245  |
| 20 | H | 16    | 0.03773  |
| 20 | P | 13    | 0.03066  |
| 20 | D | 6     | 0.01415  |
| 20 | C | 2     | 0.00472  |
| 20 | Y | 1     | 0.00236  |
| 21 | L | 41515 | 97.76517 |
| 21 | V | 398   | 0.93726  |
| 21 | I | 214   | 0.50396  |
| 21 | P | 168   | 0.39563  |
| 21 | H | 65    | 0.15307  |
| 21 | F | 43    | 0.10126  |
| 21 | G | 27    | 0.06358  |
| 21 | M | 13    | 0.03061  |
| 21 | R | 7     | 0.01648  |
| 21 | A | 4     | 0.00942  |
| 21 | Q | 4     | 0.00942  |
| 21 | S | 2     | 0.00471  |
| 21 | T | 2     | 0.00471  |
| 21 | D | 1     | 0.00235  |
| 21 | E | 1     | 0.00235  |
| 22 | S | 39905 | 93.92506 |
| 22 | T | 1081  | 2.54437  |
| 22 | A | 976   | 2.29723  |
| 22 | P | 151   | 0.35541  |
| 22 | V | 78    | 0.18359  |
| 22 | F | 70    | 0.16476  |
| 22 | L | 44    | 0.10356  |
| 22 | R | 39    | 0.09179  |
| 22 | N | 35    | 0.08238  |
| 22 | D | 25    | 0.05884  |
| 22 | Y | 25    | 0.05884  |

|    |   |       |          |
|----|---|-------|----------|
| 22 | G | 17    | 0.04001  |
| 22 | H | 13    | 0.0306   |
| 22 | I | 8     | 0.01883  |
| 22 | E | 7     | 0.01648  |
| 22 | Q | 7     | 0.01648  |
| 22 | C | 2     | 0.00471  |
| 22 | W | 2     | 0.00471  |
| 22 | K | 1     | 0.00235  |
| 23 | C | 42169 | 99.16285 |
| 23 | R | 169   | 0.39741  |
| 23 | S | 82    | 0.19283  |
| 23 | Y | 47    | 0.11052  |
| 23 | G | 18    | 0.04233  |
| 23 | W | 16    | 0.03762  |
| 23 | F | 10    | 0.02352  |
| 23 | L | 9     | 0.02116  |
| 23 | T | 2     | 0.0047   |
| 23 | H | 1     | 0.00235  |
| 23 | P | 1     | 0.00235  |
| 23 | V | 1     | 0.00235  |
| 24 | A | 20821 | 48.96294 |
| 24 | V | 9333  | 21.94761 |
| 24 | T | 5761  | 13.54764 |
| 24 | E | 2109  | 4.95955  |
| 24 | S | 1320  | 3.10413  |
| 24 | K | 611   | 1.43684  |
| 24 | Q | 505   | 1.18756  |
| 24 | L | 466   | 1.09585  |
| 24 | R | 424   | 0.99708  |
| 24 | G | 415   | 0.97592  |
| 24 | I | 331   | 0.77838  |
| 24 | D | 193   | 0.45386  |
| 24 | P | 133   | 0.31276  |
| 24 | N | 40    | 0.09406  |
| 24 | F | 18    | 0.04233  |
| 24 | H | 18    | 0.04233  |
| 24 | M | 9     | 0.02116  |
| 24 | Y | 9     | 0.02116  |
| 24 | C | 7     | 0.01646  |
| 24 | W | 1     | 0.00235  |
| 25 | A | 26858 | 63.13439 |
| 25 | V | 6804  | 15.99398 |
| 25 | T | 1724  | 4.05256  |
| 25 | G | 1554  | 3.65295  |
| 25 | S | 1261  | 2.9642   |
| 25 | I | 1097  | 2.57869  |

|    |   |       |          |
|----|---|-------|----------|
| 25 | F | 667   | 1.5679   |
| 25 | L | 548   | 1.28817  |
| 25 | P | 494   | 1.16123  |
| 25 | Y | 427   | 1.00374  |
| 25 | R | 312   | 0.73341  |
| 25 | M | 216   | 0.50775  |
| 25 | H | 188   | 0.44193  |
| 25 | D | 154   | 0.362    |
| 25 | W | 61    | 0.14339  |
| 25 | N | 57    | 0.13399  |
| 25 | K | 44    | 0.10343  |
| 25 | E | 33    | 0.07757  |
| 25 | Q | 24    | 0.05642  |
| 25 | C | 18    | 0.04231  |
| 26 | S | 37989 | 89.26616 |
| 26 | P | 1341  | 3.15107  |
| 26 | T | 914   | 2.14771  |
| 26 | A | 474   | 1.1138   |
| 26 | F | 339   | 0.79658  |
| 26 | H | 266   | 0.62504  |
| 26 | N | 215   | 0.5052   |
| 26 | R | 180   | 0.42296  |
| 26 | D | 176   | 0.41356  |
| 26 | Y | 172   | 0.40416  |
| 26 | L | 154   | 0.36187  |
| 26 | V | 128   | 0.30077  |
| 26 | G | 71    | 0.16684  |
| 26 | I | 60    | 0.14099  |
| 26 | Q | 36    | 0.08459  |
| 26 | E | 25    | 0.05874  |
| 26 | C | 9     | 0.02115  |
| 26 | K | 6     | 0.0141   |
| 26 | M | 2     | 0.0047   |
| 27 | G | 32812 | 77.05784 |
| 27 | E | 2543  | 5.97215  |
| 27 | R | 1760  | 4.1333   |
| 27 | A | 1392  | 3.26906  |
| 27 | T | 726   | 1.70499  |
| 27 | V | 622   | 1.46075  |
| 27 | D | 528   | 1.23999  |
| 27 | K | 518   | 1.21651  |
| 27 | S | 370   | 0.86893  |
| 27 | Q | 360   | 0.84545  |
| 27 | P | 349   | 0.81961  |
| 27 | L | 190   | 0.44621  |
| 27 | I | 169   | 0.39689  |

|    |   |       |          |
|----|---|-------|----------|
| 27 | F | 59    | 0.13856  |
| 27 | N | 52    | 0.12212  |
| 27 | M | 40    | 0.09394  |
| 27 | H | 36    | 0.08454  |
| 27 | Y | 31    | 0.0728   |
| 27 | W | 20    | 0.04697  |
| 27 | C | 4     | 0.00939  |
| 28 | Y | 19282 | 45.2491  |
| 28 | F | 5277  | 12.38354 |
| 28 | D | 3678  | 8.63117  |
| 28 | S | 2617  | 6.14132  |
| 28 | L | 1869  | 4.38599  |
| 28 | N | 1855  | 4.35313  |
| 28 | H | 1456  | 3.4168   |
| 28 | V | 1182  | 2.7738   |
| 28 | A | 948   | 2.22467  |
| 28 | I | 899   | 2.10968  |
| 28 | G | 682   | 1.60045  |
| 28 | R | 570   | 1.33762  |
| 28 | T | 561   | 1.3165   |
| 28 | W | 541   | 1.26957  |
| 28 | P | 437   | 1.02551  |
| 28 | E | 281   | 0.65942  |
| 28 | Q | 175   | 0.41067  |
| 28 | K | 113   | 0.26518  |
| 28 | C | 100   | 0.23467  |
| 28 | M | 90    | 0.2112   |
| 29 | T | 23735 | 55.65586 |
| 29 | I | 4193  | 9.83211  |
| 29 | S | 3697  | 8.66904  |
| 29 | A | 2138  | 5.01337  |
| 29 | P | 1857  | 4.35445  |
| 29 | R | 1163  | 2.7271   |
| 29 | L | 1078  | 2.52779  |
| 29 | V | 923   | 2.16433  |
| 29 | N | 677   | 1.58749  |
| 29 | D | 635   | 1.489    |
| 29 | G | 524   | 1.22872  |
| 29 | M | 507   | 1.18886  |
| 29 | F | 351   | 0.82305  |
| 29 | K | 301   | 0.70581  |
| 29 | Y | 244   | 0.57215  |
| 29 | Q | 229   | 0.53698  |
| 29 | H | 194   | 0.45491  |
| 29 | E | 124   | 0.29077  |
| 29 | W | 71    | 0.16649  |

|    |   |       |          |
|----|---|-------|----------|
| 29 | C | 5     | 0.01172  |
| 30 | Y | 15000 | 35.15762 |
| 30 | F | 5955  | 13.95758 |
| 30 | S | 3709  | 8.69331  |
| 30 | D | 2616  | 6.13149  |
| 30 | A | 2432  | 5.70022  |
| 30 | V | 2078  | 4.8705   |
| 30 | G | 1724  | 4.04078  |
| 30 | I | 1416  | 3.31888  |
| 30 | R | 1221  | 2.86183  |
| 30 | L | 1214  | 2.84542  |
| 30 | T | 1116  | 2.61573  |
| 30 | N | 1023  | 2.39775  |
| 30 | H | 940   | 2.20321  |
| 30 | W | 699   | 1.63835  |
| 30 | P | 484   | 1.13442  |
| 30 | E | 404   | 0.94691  |
| 30 | K | 207   | 0.48518  |
| 30 | Q | 197   | 0.46174  |
| 30 | M | 141   | 0.33048  |
| 30 | C | 89    | 0.2086   |
| 31 | S | 19816 | 46.41728 |
| 31 | R | 4380  | 10.25977 |
| 31 | N | 3981  | 9.32515  |
| 31 | G | 3259  | 7.63393  |
| 31 | T | 2862  | 6.70399  |
| 31 | D | 2241  | 5.24935  |
| 31 | A | 1168  | 2.73594  |
| 31 | K | 881   | 2.06367  |
| 31 | V | 599   | 1.40311  |
| 31 | I | 568   | 1.33049  |
| 31 | C | 455   | 1.0658   |
| 31 | E | 420   | 0.98381  |
| 31 | P | 404   | 0.94634  |
| 31 | Y | 374   | 0.87606  |
| 31 | M | 325   | 0.76128  |
| 31 | L | 299   | 0.70038  |
| 31 | H | 257   | 0.602    |
| 31 | F | 157   | 0.36776  |
| 31 | W | 138   | 0.32325  |
| 31 | Q | 107   | 0.25064  |
| 32 | S | 10219 | 23.9164  |
| 32 | T | 6613  | 15.47697 |
| 32 | R | 6567  | 15.36931 |
| 32 | N | 3671  | 8.59156  |
| 32 | G | 2784  | 6.51563  |

|    |   |       |          |
|----|---|-------|----------|
| 32 | D | 2227  | 5.21204  |
| 32 | I | 1492  | 3.49186  |
| 32 | A | 1434  | 3.35611  |
| 32 | P | 1227  | 2.87165  |
| 32 | L | 1095  | 2.56272  |
| 32 | V | 890   | 2.08294  |
| 32 | K | 823   | 1.92614  |
| 32 | M | 723   | 1.6921   |
| 32 | Y | 722   | 1.68976  |
| 32 | H | 684   | 1.60082  |
| 32 | F | 564   | 1.31998  |
| 32 | E | 351   | 0.82148  |
| 32 | W | 304   | 0.71148  |
| 32 | Q | 289   | 0.67637  |
| 32 | C | 49    | 0.11468  |
| 33 | Y | 16614 | 38.86225 |
| 33 | N | 7262  | 16.98674 |
| 33 | S | 2151  | 5.03146  |
| 33 | H | 1774  | 4.14961  |
| 33 | C | 1623  | 3.7964   |
| 33 | A | 1620  | 3.78939  |
| 33 | R | 1600  | 3.7426   |
| 33 | T | 1264  | 2.95666  |
| 33 | F | 1251  | 2.92625  |
| 33 | D | 1243  | 2.90753  |
| 33 | G | 1239  | 2.89818  |
| 33 | K | 1119  | 2.61748  |
| 33 | L | 932   | 2.18007  |
| 33 | V | 744   | 1.74031  |
| 33 | W | 693   | 1.62101  |
| 33 | I | 555   | 1.29822  |
| 33 | P | 386   | 0.9029   |
| 33 | Q | 231   | 0.54034  |
| 33 | M | 227   | 0.53098  |
| 33 | E | 223   | 0.52163  |
| 34 | C | 30484 | 71.09639 |
| 34 | S | 2282  | 5.3222   |
| 34 | Y | 2216  | 5.16827  |
| 34 | D | 1542  | 3.59633  |
| 34 | G | 1320  | 3.07857  |
| 34 | A | 789   | 1.84015  |
| 34 | R | 737   | 1.71887  |
| 34 | F | 544   | 1.26875  |
| 34 | T | 544   | 1.26875  |
| 34 | W | 455   | 1.06117  |
| 34 | V | 444   | 1.03552  |

|    |    |       |          |
|----|----|-------|----------|
| 34 | L  | 339   | 0.79063  |
| 34 | N  | 279   | 0.6507   |
| 34 | H  | 270   | 0.62971  |
| 34 | I  | 228   | 0.53175  |
| 34 | E  | 176   | 0.41048  |
| 34 | P  | 96    | 0.2239   |
| 34 | Q  | 62    | 0.1446   |
| 34 | K  | 38    | 0.08863  |
| 34 | M  | 32    | 0.07463  |
| 35 | NA | 0     | 0        |
| 36 | NA | 0     | 0        |
| 37 | NA | 0     | 0        |
| 38 | NA | 0     | 0        |
| 39 | M  | 33998 | 78.94945 |
| 39 | L  | 3366  | 7.81645  |
| 39 | V  | 2520  | 5.85189  |
| 39 | I  | 1656  | 3.84553  |
| 39 | W  | 452   | 1.04962  |
| 39 | T  | 260   | 0.60377  |
| 39 | F  | 171   | 0.39709  |
| 39 | R  | 157   | 0.36458  |
| 39 | A  | 148   | 0.34368  |
| 39 | K  | 138   | 0.32046  |
| 39 | G  | 66    | 0.15326  |
| 39 | Q  | 46    | 0.10682  |
| 39 | S  | 26    | 0.06038  |
| 39 | E  | 23    | 0.05341  |
| 39 | C  | 12    | 0.02787  |
| 39 | Y  | 12    | 0.02787  |
| 39 | H  | 6     | 0.01393  |
| 39 | P  | 6     | 0.01393  |
| 40 | G  | 26909 | 61.67404 |
| 40 | A  | 13411 | 30.73732 |
| 40 | S  | 1058  | 2.42488  |
| 40 | T  | 793   | 1.81752  |
| 40 | V  | 376   | 0.86177  |
| 40 | D  | 371   | 0.85031  |
| 40 | H  | 148   | 0.33921  |
| 40 | Y  | 136   | 0.3117   |
| 40 | R  | 113   | 0.25899  |
| 40 | N  | 107   | 0.24524  |
| 40 | E  | 62    | 0.1421   |
| 40 | L  | 30    | 0.06876  |
| 40 | C  | 27    | 0.06188  |
| 40 | Q  | 23    | 0.05271  |
| 40 | K  | 21    | 0.04813  |

|    |   |       |          |
|----|---|-------|----------|
| 40 | F | 16    | 0.03667  |
| 40 | I | 10    | 0.02292  |
| 40 | M | 9     | 0.02063  |
| 40 | W | 8     | 0.01834  |
| 40 | P | 3     | 0.00688  |
| 41 | W | 43557 | 99.0382  |
| 41 | R | 200   | 0.45475  |
| 41 | Y | 99    | 0.2251   |
| 41 | F | 64    | 0.14552  |
| 41 | L | 22    | 0.05002  |
| 41 | C | 14    | 0.03183  |
| 41 | S | 9     | 0.02046  |
| 41 | G | 8     | 0.01819  |
| 41 | V | 3     | 0.00682  |
| 41 | A | 1     | 0.00227  |
| 41 | E | 1     | 0.00227  |
| 41 | P | 1     | 0.00227  |
| 41 | Q | 1     | 0.00227  |
| 42 | F | 37048 | 83.69025 |
| 42 | Y | 3736  | 8.4395   |
| 42 | V | 993   | 2.24316  |
| 42 | L | 921   | 2.08051  |
| 42 | I | 746   | 1.68519  |
| 42 | W | 237   | 0.53538  |
| 42 | S | 225   | 0.50827  |
| 42 | H | 160   | 0.36143  |
| 42 | A | 62    | 0.14006  |
| 42 | C | 29    | 0.06551  |
| 42 | T | 25    | 0.05647  |
| 42 | N | 23    | 0.05196  |
| 42 | R | 19    | 0.04292  |
| 42 | D | 13    | 0.02937  |
| 42 | G | 9     | 0.02033  |
| 42 | P | 7     | 0.01581  |
| 42 | M | 5     | 0.01129  |
| 42 | Q | 5     | 0.01129  |
| 42 | E | 3     | 0.00678  |
| 42 | K | 2     | 0.00452  |
| 43 | R | 44049 | 98.92427 |
| 43 | H | 234   | 0.52551  |
| 43 | C | 97    | 0.21784  |
| 43 | S | 32    | 0.07186  |
| 43 | L | 31    | 0.06962  |
| 43 | Q | 25    | 0.05614  |
| 43 | P | 22    | 0.04941  |
| 43 | G | 10    | 0.02246  |



|    |   |       |          |
|----|---|-------|----------|
| 43 | F | 9     | 0.02021  |
| 43 | V | 6     | 0.01347  |
| 43 | Y | 4     | 0.00898  |
| 43 | A | 2     | 0.00449  |
| 43 | W | 2     | 0.00449  |
| 43 | D | 1     | 0.00225  |
| 43 | I | 1     | 0.00225  |
| 43 | K | 1     | 0.00225  |
| 43 | M | 1     | 0.00225  |
| 43 | T | 1     | 0.00225  |
| 44 | Q | 42187 | 94.49223 |
| 44 | R | 1102  | 2.46831  |
| 44 | E | 372   | 0.83322  |
| 44 | L | 334   | 0.74811  |
| 44 | H | 198   | 0.44349  |
| 44 | K | 151   | 0.33822  |
| 44 | D | 65    | 0.14559  |
| 44 | S | 39    | 0.08735  |
| 44 | A | 36    | 0.08063  |
| 44 | V | 35    | 0.07839  |
| 44 | P | 31    | 0.06944  |
| 44 | T | 30    | 0.0672   |
| 44 | M | 26    | 0.05824  |
| 44 | W | 12    | 0.02688  |
| 44 | G | 11    | 0.02464  |
| 44 | I | 7     | 0.01568  |
| 44 | Y | 5     | 0.0112   |
| 44 | N | 3     | 0.00672  |
| 44 | C | 1     | 0.00224  |
| 44 | F | 1     | 0.00224  |
| 45 | A | 31568 | 70.57456 |
| 45 | V | 4343  | 9.70937  |
| 45 | G | 2036  | 4.55175  |
| 45 | T | 1690  | 3.77822  |
| 45 | S | 1534  | 3.42947  |
| 45 | P | 1115  | 2.49273  |
| 45 | R | 727   | 1.62531  |
| 45 | I | 425   | 0.95015  |
| 45 | L | 260   | 0.58127  |
| 45 | D | 235   | 0.52537  |
| 45 | F | 226   | 0.50525  |
| 45 | Y | 200   | 0.44713  |
| 45 | N | 181   | 0.40465  |
| 45 | E | 75    | 0.16767  |
| 45 | H | 49    | 0.10955  |
| 45 | K | 27    | 0.06036  |

|    |   |       |          |
|----|---|-------|----------|
| 45 | Q | 26    | 0.05813  |
| 45 | C | 6     | 0.01341  |
| 45 | M | 6     | 0.01341  |
| 45 | W | 1     | 0.00224  |
| 46 | P | 40614 | 90.60771 |
| 46 | A | 1266  | 2.82438  |
| 46 | S | 945   | 2.10825  |
| 46 | L | 545   | 1.21587  |
| 46 | T | 433   | 0.966    |
| 46 | Q | 388   | 0.86561  |
| 46 | V | 213   | 0.47519  |
| 46 | R | 138   | 0.30787  |
| 46 | E | 118   | 0.26325  |
| 46 | D | 51    | 0.11378  |
| 46 | G | 46    | 0.10262  |
| 46 | K | 18    | 0.04016  |
| 46 | I | 16    | 0.0357   |
| 46 | H | 15    | 0.03346  |
| 46 | F | 8     | 0.01785  |
| 46 | N | 5     | 0.01115  |
| 46 | M | 3     | 0.00669  |
| 46 | W | 1     | 0.00223  |
| 46 | Y | 1     | 0.00223  |
| 47 | G | 43033 | 95.79493 |
| 47 | E | 900   | 2.00347  |
| 47 | D | 230   | 0.512    |
| 47 | A | 204   | 0.45412  |
| 47 | R | 194   | 0.43186  |
| 47 | T | 81    | 0.18031  |
| 47 | L | 48    | 0.10685  |
| 47 | S | 48    | 0.10685  |
| 47 | Q | 37    | 0.08236  |
| 47 | V | 36    | 0.08014  |
| 47 | P | 35    | 0.07791  |
| 47 | W | 28    | 0.06233  |
| 47 | K | 16    | 0.03562  |
| 47 | N | 13    | 0.02894  |
| 47 | M | 8     | 0.01781  |
| 47 | H | 7     | 0.01558  |
| 47 | Y | 4     | 0.0089   |
| 48 | K | 36683 | 81.53046 |
| 48 | N | 2514  | 5.58754  |
| 48 | Q | 1645  | 3.65612  |
| 48 | E | 1230  | 2.73376  |
| 48 | R | 828   | 1.84029  |
| 48 | S | 410   | 0.91125  |

|    |   |       |          |
|----|---|-------|----------|
| 48 | M | 393   | 0.87347  |
| 48 | T | 277   | 0.61565  |
| 48 | A | 206   | 0.45785  |
| 48 | D | 199   | 0.44229  |
| 48 | G | 158   | 0.35117  |
| 48 | L | 154   | 0.34228  |
| 48 | H | 113   | 0.25115  |
| 48 | P | 69    | 0.15336  |
| 48 | I | 51    | 0.11335  |
| 48 | V | 37    | 0.08224  |
| 48 | Y | 15    | 0.03334  |
| 48 | F | 11    | 0.02445  |
| 49 | E | 37070 | 82.23706 |
| 49 | G | 1928  | 4.27713  |
| 49 | Q | 1787  | 3.96433  |
| 49 | A | 1197  | 2.65546  |
| 49 | D | 952   | 2.11194  |
| 49 | K | 902   | 2.00102  |
| 49 | V | 322   | 0.71433  |
| 49 | R | 279   | 0.61894  |
| 49 | S | 167   | 0.37048  |
| 49 | P | 166   | 0.36826  |
| 49 | T | 82    | 0.18191  |
| 49 | L | 69    | 0.15307  |
| 49 | N | 47    | 0.10427  |
| 49 | M | 46    | 0.10205  |
| 49 | F | 32    | 0.07099  |
| 49 | W | 12    | 0.02662  |
| 49 | H | 10    | 0.02218  |
| 49 | Y | 6     | 0.01331  |
| 49 | I | 3     | 0.00666  |
| 50 | R | 42036 | 93.04941 |
| 50 | C | 1687  | 3.73428  |
| 50 | L | 364   | 0.80574  |
| 50 | H | 304   | 0.67292  |
| 50 | P | 272   | 0.60209  |
| 50 | S | 126   | 0.27891  |
| 50 | G | 110   | 0.24349  |
| 50 | V | 50    | 0.11068  |
| 50 | D | 45    | 0.09961  |
| 50 | A | 33    | 0.07305  |
| 50 | Y | 29    | 0.06419  |
| 50 | F | 27    | 0.05977  |
| 50 | Q | 23    | 0.05091  |
| 50 | T | 17    | 0.03763  |
| 50 | I | 16    | 0.03542  |

|    |   |       |          |
|----|---|-------|----------|
| 50 | N | 13    | 0.02878  |
| 50 | E | 10    | 0.02214  |
| 50 | K | 9     | 0.01992  |
| 50 | W | 4     | 0.00885  |
| 50 | M | 1     | 0.00221  |
| 51 | E | 42720 | 94.40467 |
| 51 | D | 670   | 1.4806   |
| 51 | V | 474   | 1.04747  |
| 51 | K | 337   | 0.74472  |
| 51 | Q | 289   | 0.63865  |
| 51 | G | 270   | 0.59666  |
| 51 | A | 226   | 0.49943  |
| 51 | R | 90    | 0.19889  |
| 51 | L | 51    | 0.1127   |
| 51 | M | 26    | 0.05746  |
| 51 | S | 25    | 0.05525  |
| 51 | I | 24    | 0.05304  |
| 51 | T | 23    | 0.05083  |
| 51 | N | 11    | 0.02431  |
| 51 | W | 7     | 0.01547  |
| 51 | Y | 4     | 0.00884  |
| 51 | F | 2     | 0.00442  |
| 51 | P | 2     | 0.00442  |
| 51 | H | 1     | 0.00221  |
| 52 | G | 30935 | 68.30426 |
| 52 | A | 3846  | 8.49194  |
| 52 | L | 2323  | 5.12917  |
| 52 | R | 1677  | 3.7028   |
| 52 | W | 1506  | 3.32524  |
| 52 | E | 1466  | 3.23692  |
| 52 | V | 1329  | 2.93442  |
| 52 | F | 679   | 1.49923  |
| 52 | M | 338   | 0.7463   |
| 52 | P | 293   | 0.64694  |
| 52 | K | 238   | 0.5255   |
| 52 | S | 134   | 0.29587  |
| 52 | T | 126   | 0.27821  |
| 52 | D | 102   | 0.22522  |
| 52 | I | 84    | 0.18547  |
| 52 | Q | 79    | 0.17443  |
| 52 | N | 69    | 0.15235  |
| 52 | H | 41    | 0.09053  |
| 52 | Y | 15    | 0.03312  |
| 52 | C | 10    | 0.02208  |
| 53 | V | 40436 | 89.15052 |
| 53 | I | 3126  | 6.89199  |

|    |   |       |          |
|----|---|-------|----------|
| 53 | L | 1369  | 3.01828  |
| 53 | A | 150   | 0.33071  |
| 53 | F | 107   | 0.23591  |
| 53 | D | 66    | 0.14551  |
| 53 | G | 44    | 0.09701  |
| 53 | C | 14    | 0.03087  |
| 53 | M | 14    | 0.03087  |
| 53 | T | 12    | 0.02646  |
| 53 | N | 6     | 0.01323  |
| 53 | P | 3     | 0.00661  |
| 53 | R | 3     | 0.00661  |
| 53 | S | 3     | 0.00661  |
| 53 | Y | 2     | 0.00441  |
| 53 | H | 1     | 0.0022   |
| 53 | K | 1     | 0.0022   |
| 54 | A | 40182 | 88.46958 |
| 54 | S | 3512  | 7.73245  |
| 54 | G | 858   | 1.88908  |
| 54 | V | 448   | 0.98637  |
| 54 | T | 315   | 0.69354  |
| 54 | P | 28    | 0.06165  |
| 54 | I | 22    | 0.04844  |
| 54 | L | 18    | 0.03963  |
| 54 | E | 14    | 0.03082  |
| 54 | C | 4     | 0.00881  |
| 54 | M | 3     | 0.00661  |
| 54 | Q | 3     | 0.00661  |
| 54 | W | 3     | 0.00661  |
| 54 | Y | 3     | 0.00661  |
| 54 | D | 2     | 0.0044   |
| 54 | F | 2     | 0.0044   |
| 54 | K | 1     | 0.0022   |
| 54 | R | 1     | 0.0022   |
| 55 | A | 15061 | 33.11129 |
| 55 | T | 7376  | 16.21598 |
| 55 | S | 6872  | 15.10795 |
| 55 | V | 3778  | 8.30585  |
| 55 | G | 3209  | 7.05492  |
| 55 | R | 2544  | 5.59293  |
| 55 | I | 1264  | 2.77888  |
| 55 | L | 866   | 1.90388  |
| 55 | H | 820   | 1.80275  |
| 55 | F | 676   | 1.48617  |
| 55 | C | 617   | 1.35646  |
| 55 | Y | 471   | 1.03548  |
| 55 | N | 458   | 1.0069   |

|    |   |       |          |
|----|---|-------|----------|
| 55 | D | 359   | 0.78925  |
| 55 | Q | 280   | 0.61557  |
| 55 | E | 274   | 0.60238  |
| 55 | M | 274   | 0.60238  |
| 55 | K | 153   | 0.33637  |
| 55 | W | 109   | 0.23963  |
| 55 | P | 25    | 0.05496  |
| 56 | I | 34117 | 74.91985 |
| 56 | L | 3564  | 7.82643  |
| 56 | V | 2324  | 5.10343  |
| 56 | M | 1436  | 3.15341  |
| 56 | F | 1309  | 2.87452  |
| 56 | T | 790   | 1.73481  |
| 56 | S | 615   | 1.35052  |
| 56 | A | 459   | 1.00795  |
| 56 | R | 252   | 0.55338  |
| 56 | Y | 142   | 0.31183  |
| 56 | K | 138   | 0.30304  |
| 56 | H | 81    | 0.17787  |
| 56 | D | 61    | 0.13395  |
| 56 | Q | 54    | 0.11858  |
| 56 | N | 52    | 0.11419  |
| 56 | W | 45    | 0.09882  |
| 56 | E | 30    | 0.06588  |
| 56 | G | 24    | 0.0527   |
| 56 | C | 23    | 0.05051  |
| 56 | P | 22    | 0.04831  |
| 57 | D | 14695 | 32.2379  |
| 57 | Y | 8949  | 19.63232 |
| 57 | S | 4604  | 10.10026 |
| 57 | G | 2795  | 6.13167  |
| 57 | N | 2281  | 5.00406  |
| 57 | A | 2276  | 4.99309  |
| 57 | E | 1602  | 3.51447  |
| 57 | T | 1468  | 3.2205   |
| 57 | H | 1416  | 3.10642  |
| 57 | R | 1335  | 2.92872  |
| 57 | F | 951   | 2.0863   |
| 57 | W | 862   | 1.89106  |
| 57 | V | 586   | 1.28557  |
| 57 | L | 514   | 1.12761  |
| 57 | Q | 333   | 0.73054  |
| 57 | C | 301   | 0.66033  |
| 57 | I | 216   | 0.47386  |
| 57 | K | 192   | 0.42121  |
| 57 | P | 135   | 0.29616  |

|    |   |       |          |
|----|---|-------|----------|
| 57 | M | 72    | 0.15795  |
| 58 | S | 13336 | 29.20974 |
| 58 | T | 11558 | 25.3154  |
| 58 | R | 4247  | 9.30217  |
| 58 | G | 2560  | 5.60715  |
| 58 | P | 2288  | 5.01139  |
| 58 | A | 1967  | 4.30831  |
| 58 | N | 1899  | 4.15937  |
| 58 | I | 1487  | 3.25697  |
| 58 | D | 1157  | 2.53417  |
| 58 | V | 993   | 2.17496  |
| 58 | Q | 793   | 1.7369   |
| 58 | L | 695   | 1.52225  |
| 58 | K | 579   | 1.26818  |
| 58 | H | 430   | 0.94183  |
| 58 | F | 426   | 0.93306  |
| 58 | Y | 339   | 0.74251  |
| 58 | M | 320   | 0.70089  |
| 58 | E | 260   | 0.56948  |
| 58 | W | 226   | 0.49501  |
| 58 | C | 96    | 0.21027  |
| 59 | D | 18483 | 40.43093 |
| 59 | G | 11276 | 24.66586 |
| 59 | A | 2664  | 5.82741  |
| 59 | R | 2159  | 4.72274  |
| 59 | S | 2018  | 4.41431  |
| 59 | N | 1567  | 3.42776  |
| 59 | E | 1272  | 2.78246  |
| 59 | Y | 997   | 2.1809   |
| 59 | V | 961   | 2.10215  |
| 59 | T | 939   | 2.05403  |
| 59 | H | 843   | 1.84403  |
| 59 | L | 621   | 1.35842  |
| 59 | P | 500   | 1.09373  |
| 59 | I | 438   | 0.95811  |
| 59 | F | 409   | 0.89467  |
| 59 | Q | 241   | 0.52718  |
| 59 | K | 178   | 0.38937  |
| 59 | W | 76    | 0.16625  |
| 59 | M | 40    | 0.0875   |
| 59 | C | 33    | 0.07219  |
| 60 | G | 31151 | 68.03162 |
| 60 | D | 4940  | 10.78862 |
| 60 | S | 2726  | 5.95339  |
| 60 | T | 1575  | 3.43969  |
| 60 | A | 1515  | 3.30865  |

|    |   |       |          |
|----|---|-------|----------|
| 60 | N | 894   | 1.95243  |
| 60 | R | 777   | 1.69691  |
| 60 | E | 427   | 0.93254  |
| 60 | L | 383   | 0.83645  |
| 60 | V | 337   | 0.73598  |
| 60 | F | 202   | 0.44115  |
| 60 | Y | 188   | 0.41058  |
| 60 | H | 186   | 0.40621  |
| 60 | I | 164   | 0.35816  |
| 60 | P | 151   | 0.32977  |
| 60 | Q | 65    | 0.14196  |
| 60 | K | 49    | 0.10701  |
| 60 | W | 22    | 0.04805  |
| 60 | C | 20    | 0.04368  |
| 60 | M | 17    | 0.03713  |
| 61 | G | 12393 | 27.01236 |
| 61 | S | 9165  | 19.97646 |
| 61 | T | 6559  | 14.2963  |
| 61 | R | 4621  | 10.07215 |
| 61 | D | 2499  | 5.44694  |
| 61 | A | 1833  | 3.99529  |
| 61 | N | 1810  | 3.94516  |
| 61 | V | 1214  | 2.64609  |
| 61 | I | 1209  | 2.63519  |
| 61 | E | 908   | 1.97912  |
| 61 | K | 706   | 1.53883  |
| 61 | L | 631   | 1.37536  |
| 61 | F | 434   | 0.94597  |
| 61 | P | 415   | 0.90455  |
| 61 | M | 410   | 0.89366  |
| 61 | Y | 385   | 0.83916  |
| 61 | H | 325   | 0.70839  |
| 61 | Q | 246   | 0.53619  |
| 61 | W | 93    | 0.20271  |
| 61 | C | 23    | 0.05013  |
| 62 | T | 22145 | 48.19893 |
| 62 | S | 6024  | 13.11133 |
| 62 | R | 2876  | 6.25966  |
| 62 | A | 2836  | 6.1726   |
| 62 | I | 2522  | 5.48917  |
| 62 | P | 1689  | 3.67613  |
| 62 | N | 1509  | 3.28436  |
| 62 | K | 1084  | 2.35934  |
| 62 | V | 1060  | 2.30711  |
| 62 | G | 1038  | 2.25922  |
| 62 | D | 722   | 1.57144  |



|    |    |       |          |
|----|----|-------|----------|
| 62 | L  | 546   | 1.18838  |
| 62 | E  | 470   | 1.02296  |
| 62 | M  | 398   | 0.86625  |
| 62 | Y  | 312   | 0.67907  |
| 62 | H  | 224   | 0.48754  |
| 62 | F  | 213   | 0.4636   |
| 62 | Q  | 178   | 0.38742  |
| 62 | W  | 82    | 0.17847  |
| 62 | C  | 17    | 0.037    |
| 63 | T  | 13547 | 71.8407  |
| 63 | A  | 1369  | 7.2599   |
| 63 | P  | 1093  | 5.79626  |
| 63 | S  | 698   | 3.70154  |
| 63 | I  | 643   | 3.40987  |
| 63 | K  | 283   | 1.50077  |
| 63 | R  | 278   | 1.47425  |
| 63 | L  | 255   | 1.35228  |
| 63 | V  | 183   | 0.97046  |
| 63 | E  | 164   | 0.8697   |
| 63 | Q  | 111   | 0.58864  |
| 63 | G  | 50    | 0.26515  |
| 63 | M  | 44    | 0.23334  |
| 63 | N  | 34    | 0.1803   |
| 63 | F  | 32    | 0.1697   |
| 63 | D  | 31    | 0.1644   |
| 63 | W  | 23    | 0.12197  |
| 63 | Y  | 11    | 0.05833  |
| 63 | H  | 5     | 0.02652  |
| 63 | C  | 3     | 0.01591  |
| 63 | NA | 0     | 0        |
| 64 | NA | 0     | 0        |
| 65 | NA | 0     | 0        |
| 66 | Y  | 11645 | 25.27566 |
| 66 | T  | 7190  | 15.60601 |
| 66 | S  | 6726  | 14.59889 |
| 66 | R  | 3094  | 6.71558  |
| 66 | N  | 2563  | 5.56303  |
| 66 | D  | 1886  | 4.09359  |
| 66 | F  | 1870  | 4.05886  |
| 66 | A  | 1772  | 3.84615  |
| 66 | H  | 1427  | 3.09733  |
| 66 | V  | 1408  | 3.05609  |
| 66 | K  | 1174  | 2.54819  |
| 66 | L  | 1025  | 2.22478  |
| 66 | W  | 1007  | 2.18571  |
| 66 | I  | 949   | 2.05982  |

|    |   |       |          |
|----|---|-------|----------|
| 66 | E | 737   | 1.59967  |
| 66 | G | 562   | 1.21983  |
| 66 | M | 457   | 0.99193  |
| 66 | Q | 356   | 0.7727   |
| 66 | C | 182   | 0.39503  |
| 66 | P | 42    | 0.09116  |
| 67 | Y | 43065 | 92.92265 |
| 67 | V | 783   | 1.6895   |
| 67 | H | 464   | 1.00119  |
| 67 | F | 427   | 0.92135  |
| 67 | I | 425   | 0.91704  |
| 67 | S | 264   | 0.56964  |
| 67 | L | 258   | 0.55669  |
| 67 | C | 180   | 0.38839  |
| 67 | D | 131   | 0.28266  |
| 67 | T | 129   | 0.27835  |
| 67 | N | 85    | 0.18341  |
| 67 | A | 56    | 0.12083  |
| 67 | W | 20    | 0.04315  |
| 67 | P | 12    | 0.02589  |
| 67 | E | 11    | 0.02374  |
| 67 | R | 10    | 0.02158  |
| 67 | K | 9     | 0.01942  |
| 67 | G | 8     | 0.01726  |
| 67 | M | 5     | 0.01079  |
| 67 | Q | 3     | 0.00647  |
| 68 | A | 31976 | 68.34523 |
| 68 | S | 3232  | 6.90805  |
| 68 | T | 2528  | 5.40333  |
| 68 | V | 2066  | 4.41585  |
| 68 | G | 2054  | 4.3902   |
| 68 | D | 1201  | 2.56701  |
| 68 | R | 796   | 1.70136  |
| 68 | L | 607   | 1.2974   |
| 68 | E | 512   | 1.09434  |
| 68 | I | 454   | 0.97038  |
| 68 | P | 434   | 0.92763  |
| 68 | H | 361   | 0.7716   |
| 68 | K | 148   | 0.31633  |
| 68 | Q | 147   | 0.3142   |
| 68 | N | 118   | 0.25221  |
| 68 | F | 65    | 0.13893  |
| 68 | Y | 55    | 0.11756  |
| 68 | M | 15    | 0.03206  |
| 68 | W | 12    | 0.02565  |
| 68 | C | 5     | 0.01069  |

|    |   |       |          |
|----|---|-------|----------|
| 69 | D | 38529 | 81.81818 |
| 69 | E | 2700  | 5.73358  |
| 69 | N | 1324  | 2.81158  |
| 69 | A | 1302  | 2.76486  |
| 69 | G | 903   | 1.91756  |
| 69 | H | 409   | 0.86853  |
| 69 | S | 406   | 0.86216  |
| 69 | P | 312   | 0.66255  |
| 69 | R | 270   | 0.57336  |
| 69 | T | 214   | 0.45444  |
| 69 | V | 204   | 0.4332   |
| 69 | K | 168   | 0.35676  |
| 69 | Y | 143   | 0.30367  |
| 69 | Q | 126   | 0.26757  |
| 69 | L | 39    | 0.08282  |
| 69 | I | 22    | 0.04672  |
| 69 | W | 11    | 0.02336  |
| 69 | F | 5     | 0.01062  |
| 69 | M | 3     | 0.00637  |
| 69 | C | 1     | 0.00212  |
| 70 | S | 42550 | 88.21395 |
| 70 | F | 1747  | 3.62185  |
| 70 | A | 1691  | 3.50575  |
| 70 | P | 745   | 1.54452  |
| 70 | T | 417   | 0.86452  |
| 70 | Y | 256   | 0.53073  |
| 70 | D | 229   | 0.47476  |
| 70 | V | 175   | 0.36281  |
| 70 | L | 105   | 0.21768  |
| 70 | G | 70    | 0.14512  |
| 70 | R | 47    | 0.09744  |
| 70 | N | 46    | 0.09537  |
| 70 | W | 39    | 0.08085  |
| 70 | Q | 36    | 0.07463  |
| 70 | H | 31    | 0.06427  |
| 70 | I | 31    | 0.06427  |
| 70 | E | 6     | 0.01244  |
| 70 | K | 5     | 0.01037  |
| 70 | M | 5     | 0.01037  |
| 70 | C | 4     | 0.00829  |
| 71 | V | 45883 | 93.48615 |
| 71 | A | 1833  | 3.73472  |
| 71 | L | 453   | 0.92298  |
| 71 | M | 424   | 0.8639   |
| 71 | I | 193   | 0.39324  |
| 71 | E | 111   | 0.22616  |

|    |    |       |          |
|----|----|-------|----------|
| 71 | G  | 51    | 0.10391  |
| 71 | T  | 41    | 0.08354  |
| 71 | S  | 26    | 0.05297  |
| 71 | F  | 22    | 0.04482  |
| 71 | N  | 11    | 0.02241  |
| 71 | D  | 9     | 0.01834  |
| 71 | P  | 5     | 0.01019  |
| 71 | Q  | 5     | 0.01019  |
| 71 | R  | 5     | 0.01019  |
| 71 | K  | 4     | 0.00815  |
| 71 | W  | 3     | 0.00611  |
| 71 | H  | 1     | 0.00204  |
| 72 | K  | 42831 | 86.88006 |
| 72 | E  | 1576  | 3.19682  |
| 72 | R  | 1441  | 2.92298  |
| 72 | Q  | 1399  | 2.83779  |
| 72 | N  | 527   | 1.06899  |
| 72 | L  | 353   | 0.71604  |
| 72 | T  | 313   | 0.6349   |
| 72 | M  | 252   | 0.51117  |
| 72 | A  | 239   | 0.4848   |
| 72 | S  | 159   | 0.32252  |
| 72 | V  | 72    | 0.14605  |
| 72 | W  | 37    | 0.07505  |
| 72 | G  | 35    | 0.071    |
| 72 | D  | 30    | 0.06085  |
| 72 | I  | 15    | 0.03043  |
| 72 | H  | 12    | 0.02434  |
| 72 | F  | 4     | 0.00811  |
| 72 | P  | 2     | 0.00406  |
| 72 | Y  | 2     | 0.00406  |
| 73 | NA | 0     | 0        |
| 74 | G  | 47373 | 95.14943 |
| 74 | D  | 1561  | 3.13529  |
| 74 | A  | 396   | 0.79537  |
| 74 | S  | 119   | 0.23901  |
| 74 | E  | 117   | 0.235    |
| 74 | R  | 64    | 0.12855  |
| 74 | V  | 60    | 0.12051  |
| 74 | L  | 30    | 0.06026  |
| 74 | T  | 21    | 0.04218  |
| 74 | C  | 20    | 0.04017  |
| 74 | N  | 12    | 0.0241   |
| 74 | Y  | 9     | 0.01808  |
| 74 | H  | 3     | 0.00603  |
| 74 | P  | 2     | 0.00402  |

|    |   |       |          |
|----|---|-------|----------|
| 74 | K | 1     | 0.00201  |
| 75 | R | 49764 | 99.49815 |
| 75 | Q | 134   | 0.26792  |
| 75 | L | 33    | 0.06598  |
| 75 | H | 30    | 0.05998  |
| 75 | G | 18    | 0.03599  |
| 75 | C | 11    | 0.02199  |
| 75 | P | 10    | 0.01999  |
| 75 | W | 9     | 0.01799  |
| 75 | K | 3     | 0.006    |
| 75 | S | 3     | 0.006    |
| 76 | F | 48787 | 97.35787 |
| 76 | L | 346   | 0.69047  |
| 76 | S | 301   | 0.60067  |
| 76 | V | 270   | 0.5388   |
| 76 | A | 141   | 0.28138  |
| 76 | Y | 123   | 0.24546  |
| 76 | I | 79    | 0.15765  |
| 76 | C | 39    | 0.07783  |
| 76 | M | 7     | 0.01397  |
| 76 | H | 5     | 0.00998  |
| 76 | W | 5     | 0.00998  |
| 76 | T | 4     | 0.00798  |
| 76 | G | 3     | 0.00599  |
| 76 | K | 1     | 0.002    |
| 77 | T | 45154 | 89.93746 |
| 77 | A | 1956  | 3.89595  |
| 77 | S | 1273  | 2.53555  |
| 77 | I | 974   | 1.94001  |
| 77 | V | 202   | 0.40234  |
| 77 | N | 196   | 0.39039  |
| 77 | F | 124   | 0.24698  |
| 77 | R | 77    | 0.15337  |
| 77 | L | 50    | 0.09959  |
| 77 | D | 43    | 0.08565  |
| 77 | P | 34    | 0.06772  |
| 77 | G | 31    | 0.06175  |
| 77 | K | 26    | 0.05179  |
| 77 | M | 21    | 0.04183  |
| 77 | E | 18    | 0.03585  |
| 77 | H | 17    | 0.03386  |
| 77 | Y | 8     | 0.01593  |
| 77 | C | 1     | 0.00199  |
| 77 | W | 1     | 0.00199  |
| 78 | I | 44231 | 87.92565 |
| 78 | V | 3469  | 6.89593  |

|    |   |       |          |
|----|---|-------|----------|
| 78 | L | 1044  | 2.07534  |
| 78 | T | 415   | 0.82497  |
| 78 | A | 387   | 0.76931  |
| 78 | M | 322   | 0.6401   |
| 78 | F | 238   | 0.47311  |
| 78 | N | 61    | 0.12126  |
| 78 | Y | 42    | 0.08349  |
| 78 | S | 36    | 0.07156  |
| 78 | C | 17    | 0.03379  |
| 78 | G | 16    | 0.03181  |
| 78 | R | 9     | 0.01789  |
| 78 | P | 5     | 0.00994  |
| 78 | W | 5     | 0.00994  |
| 78 | H | 4     | 0.00795  |
| 78 | D | 1     | 0.00199  |
| 78 | E | 1     | 0.00199  |
| 78 | K | 1     | 0.00199  |
| 78 | Q | 1     | 0.00199  |
| 79 | S | 46945 | 93.12267 |
| 79 | T | 1145  | 2.27128  |
| 79 | A | 900   | 1.78529  |
| 79 | F | 593   | 1.17631  |
| 79 | P | 200   | 0.39673  |
| 79 | Y | 149   | 0.29556  |
| 79 | V | 142   | 0.28168  |
| 79 | D | 55    | 0.1091   |
| 79 | L | 54    | 0.10712  |
| 79 | H | 52    | 0.10315  |
| 79 | I | 51    | 0.10117  |
| 79 | W | 44    | 0.08728  |
| 79 | R | 38    | 0.07538  |
| 79 | N | 21    | 0.04166  |
| 79 | G | 20    | 0.03967  |
| 79 | C | 3     | 0.00595  |
| 80 | K | 15307 | 30.33492 |
| 80 | Q | 13899 | 27.54459 |
| 80 | R | 12393 | 24.56005 |
| 80 | H | 3157  | 6.25644  |
| 80 | L | 1775  | 3.51764  |
| 80 | E | 1269  | 2.51486  |
| 80 | T | 504   | 0.99881  |
| 80 | I | 370   | 0.73325  |
| 80 | V | 345   | 0.68371  |
| 80 | A | 220   | 0.43599  |
| 80 | Y | 220   | 0.43599  |
| 80 | G | 194   | 0.38446  |

|    |   |       |          |
|----|---|-------|----------|
| 80 | S | 191   | 0.37852  |
| 80 | N | 185   | 0.36663  |
| 80 | P | 180   | 0.35672  |
| 80 | F | 78    | 0.15458  |
| 80 | M | 75    | 0.14863  |
| 80 | W | 65    | 0.12881  |
| 80 | D | 30    | 0.05945  |
| 80 | C | 3     | 0.00595  |
| 81 | D | 45794 | 90.68119 |
| 81 | G | 1322  | 2.61782  |
| 81 | V | 1022  | 2.02376  |
| 81 | N | 839   | 1.66139  |
| 81 | E | 721   | 1.42772  |
| 81 | A | 363   | 0.71881  |
| 81 | H | 116   | 0.2297   |
| 81 | S | 105   | 0.20792  |
| 81 | Q | 40    | 0.07921  |
| 81 | T | 39    | 0.07723  |
| 81 | Y | 39    | 0.07723  |
| 81 | R | 37    | 0.07327  |
| 81 | I | 20    | 0.0396   |
| 81 | P | 17    | 0.03366  |
| 81 | L | 13    | 0.02574  |
| 81 | F | 8     | 0.01584  |
| 81 | K | 5     | 0.0099   |
| 82 | N | 33625 | 66.53014 |
| 82 | S | 3995  | 7.90447  |
| 82 | D | 2900  | 5.73792  |
| 82 | K | 2806  | 5.55193  |
| 82 | T | 1564  | 3.09452  |
| 82 | I | 905   | 1.79063  |
| 82 | R | 892   | 1.7649   |
| 82 | Y | 847   | 1.67587  |
| 82 | G | 603   | 1.19309  |
| 82 | V | 593   | 1.1733   |
| 82 | A | 463   | 0.91609  |
| 82 | H | 460   | 0.91015  |
| 82 | L | 223   | 0.44123  |
| 82 | E | 170   | 0.33636  |
| 82 | Q | 149   | 0.29481  |
| 82 | M | 122   | 0.24139  |
| 82 | P | 108   | 0.21369  |
| 82 | F | 95    | 0.18797  |
| 82 | C | 18    | 0.03561  |
| 82 | W | 3     | 0.00594  |
| 83 | A | 38757 | 76.63424 |

|    |   |       |          |
|----|---|-------|----------|
| 83 | T | 3487  | 6.89485  |
| 83 | S | 1849  | 3.65603  |
| 83 | D | 1670  | 3.30209  |
| 83 | G | 1316  | 2.60213  |
| 83 | V | 1314  | 2.59817  |
| 83 | P | 539   | 1.06577  |
| 83 | N | 414   | 0.8186   |
| 83 | R | 360   | 0.71183  |
| 83 | E | 220   | 0.43501  |
| 83 | I | 189   | 0.37371  |
| 83 | F | 150   | 0.2966   |
| 83 | L | 111   | 0.21948  |
| 83 | Y | 87    | 0.17203  |
| 83 | H | 64    | 0.12655  |
| 83 | Q | 23    | 0.04548  |
| 83 | M | 14    | 0.02768  |
| 83 | W | 7     | 0.01384  |
| 83 | K | 2     | 0.00395  |
| 83 | C | 1     | 0.00198  |
| 84 | K | 36552 | 72.24715 |
| 84 | N | 3656  | 7.2263   |
| 84 | E | 3050  | 6.0285   |
| 84 | R | 2180  | 4.3089   |
| 84 | G | 983   | 1.94296  |
| 84 | Q | 822   | 1.62473  |
| 84 | T | 813   | 1.60694  |
| 84 | A | 553   | 1.09304  |
| 84 | D | 457   | 0.90329  |
| 84 | S | 377   | 0.74516  |
| 84 | M | 312   | 0.61669  |
| 84 | L | 240   | 0.47437  |
| 84 | V | 220   | 0.43484  |
| 84 | W | 169   | 0.33404  |
| 84 | H | 96    | 0.18975  |
| 84 | I | 50    | 0.09883  |
| 84 | Y | 29    | 0.05732  |
| 84 | P | 20    | 0.03953  |
| 84 | F | 14    | 0.02767  |
| 85 | N | 36946 | 73.01581 |
| 85 | K | 3559  | 7.0336   |
| 85 | S | 2381  | 4.70553  |
| 85 | D | 1949  | 3.85178  |
| 85 | T | 1357  | 2.68182  |
| 85 | R | 1333  | 2.63439  |
| 85 | H | 681   | 1.34585  |
| 85 | G | 564   | 1.11462  |



|    |   |       |          |
|----|---|-------|----------|
| 85 | A | 442   | 0.87352  |
| 85 | Y | 384   | 0.75889  |
| 85 | M | 230   | 0.45455  |
| 85 | I | 173   | 0.3419   |
| 85 | E | 170   | 0.33597  |
| 85 | Q | 157   | 0.31028  |
| 85 | P | 89    | 0.17589  |
| 85 | L | 87    | 0.17194  |
| 85 | V | 64    | 0.12648  |
| 85 | F | 28    | 0.05534  |
| 85 | C | 5     | 0.00988  |
| 85 | W | 1     | 0.00198  |
| 86 | T | 42008 | 83.00828 |
| 86 | I | 2748  | 5.43008  |
| 86 | A | 1447  | 2.85929  |
| 86 | M | 1408  | 2.78222  |
| 86 | S | 1123  | 2.21906  |
| 86 | V | 600   | 1.18561  |
| 86 | N | 281   | 0.55526  |
| 86 | K | 212   | 0.41891  |
| 86 | R | 201   | 0.39718  |
| 86 | L | 200   | 0.3952   |
| 86 | P | 122   | 0.24107  |
| 86 | E | 117   | 0.23119  |
| 86 | Q | 40    | 0.07904  |
| 86 | F | 36    | 0.07114  |
| 86 | Y | 22    | 0.04347  |
| 86 | G | 21    | 0.0415   |
| 86 | D | 13    | 0.02569  |
| 86 | H | 3     | 0.00593  |
| 86 | W | 3     | 0.00593  |
| 86 | C | 2     | 0.00395  |
| 87 | L | 29556 | 58.39837 |
| 87 | V | 15167 | 29.96779 |
| 87 | M | 2232  | 4.41011  |
| 87 | I | 1185  | 2.34139  |
| 87 | A | 675   | 1.3337   |
| 87 | T | 447   | 0.88321  |
| 87 | H | 401   | 0.79232  |
| 87 | F | 221   | 0.43666  |
| 87 | W | 171   | 0.33787  |
| 87 | P | 117   | 0.23118  |
| 87 | Q | 106   | 0.20944  |
| 87 | Y | 94    | 0.18573  |
| 87 | S | 90    | 0.17783  |
| 87 | G | 60    | 0.11855  |

|    |   |       |          |
|----|---|-------|----------|
| 87 | E | 30    | 0.05928  |
| 87 | R | 29    | 0.0573   |
| 87 | C | 22    | 0.04347  |
| 87 | K | 6     | 0.01186  |
| 87 | D | 1     | 0.00198  |
| 87 | N | 1     | 0.00198  |
| 88 | Y | 39230 | 77.50667 |
| 88 | F | 2792  | 5.51615  |
| 88 | H | 2084  | 4.11736  |
| 88 | D | 1551  | 3.06431  |
| 88 | S | 1416  | 2.79759  |
| 88 | T | 1008  | 1.9915   |
| 88 | N | 670   | 1.32372  |
| 88 | W | 396   | 0.78238  |
| 88 | L | 338   | 0.66779  |
| 88 | V | 297   | 0.58678  |
| 88 | I | 293   | 0.57888  |
| 88 | A | 235   | 0.46429  |
| 88 | C | 108   | 0.21338  |
| 88 | R | 69    | 0.13632  |
| 88 | E | 52    | 0.10274  |
| 88 | Q | 26    | 0.05137  |
| 88 | M | 19    | 0.03754  |
| 88 | P | 17    | 0.03359  |
| 88 | G | 9     | 0.01778  |
| 88 | K | 5     | 0.00988  |
| 89 | L | 50232 | 99.23154 |
| 89 | P | 186   | 0.36744  |
| 89 | Q | 80    | 0.15804  |
| 89 | M | 46    | 0.09087  |
| 89 | I | 20    | 0.03951  |
| 89 | R | 16    | 0.03161  |
| 89 | H | 12    | 0.02371  |
| 89 | S | 11    | 0.02173  |
| 89 | V | 9     | 0.01778  |
| 89 | F | 8     | 0.0158   |
| 89 | T | 1     | 0.00198  |
| 90 | Q | 43608 | 86.13926 |
| 90 | E | 3574  | 7.05975  |
| 90 | R | 1058  | 2.08988  |
| 90 | H | 973   | 1.92198  |
| 90 | L | 425   | 0.83951  |
| 90 | D | 335   | 0.66173  |
| 90 | K | 143   | 0.28247  |
| 90 | T | 122   | 0.24099  |
| 90 | A | 92    | 0.18173  |

|    |   |       |          |
|----|---|-------|----------|
| 90 | I | 68    | 0.13432  |
| 90 | V | 53    | 0.10469  |
| 90 | G | 38    | 0.07506  |
| 90 | M | 34    | 0.06716  |
| 90 | Y | 28    | 0.05531  |
| 90 | S | 27    | 0.05333  |
| 90 | N | 21    | 0.04148  |
| 90 | F | 16    | 0.0316   |
| 90 | P | 9     | 0.01778  |
| 90 | C | 1     | 0.00198  |
| 91 | M | 47861 | 94.53838 |
| 91 | L | 1536  | 3.03401  |
| 91 | I | 739   | 1.45972  |
| 91 | V | 219   | 0.43258  |
| 91 | T | 156   | 0.30814  |
| 91 | K | 46    | 0.09086  |
| 91 | A | 40    | 0.07901  |
| 91 | R | 14    | 0.02765  |
| 91 | S | 9     | 0.01778  |
| 91 | G | 5     | 0.00988  |
| 91 | P | 1     | 0.00198  |
| 92 | N | 37718 | 74.50322 |
| 92 | D | 7011  | 13.84862 |
| 92 | S | 2556  | 5.04879  |
| 92 | T | 1549  | 3.05969  |
| 92 | H | 395   | 0.78023  |
| 92 | I | 233   | 0.46024  |
| 92 | K | 222   | 0.43851  |
| 92 | E | 198   | 0.3911   |
| 92 | Y | 173   | 0.34172  |
| 92 | R | 146   | 0.28839  |
| 92 | A | 123   | 0.24296  |
| 92 | G | 106   | 0.20938  |
| 92 | V | 66    | 0.13037  |
| 92 | M | 44    | 0.08691  |
| 92 | L | 29    | 0.05728  |
| 92 | Q | 24    | 0.04741  |
| 92 | F | 20    | 0.03951  |
| 92 | P | 6     | 0.01185  |
| 92 | W | 4     | 0.0079   |
| 92 | C | 3     | 0.00593  |
| 93 | S | 31458 | 62.13312 |
| 93 | N | 11172 | 22.06597 |
| 93 | D | 3017  | 5.95892  |
| 93 | G | 1250  | 2.46889  |
| 93 | R | 1188  | 2.34643  |

|    |   |       |          |
|----|---|-------|----------|
| 93 | T | 869   | 1.71637  |
| 93 | A | 673   | 1.32925  |
| 93 | K | 226   | 0.44638  |
| 93 | M | 172   | 0.33972  |
| 93 | H | 101   | 0.19949  |
| 93 | I | 99    | 0.19554  |
| 93 | E | 88    | 0.17381  |
| 93 | Y | 76    | 0.15011  |
| 93 | V | 53    | 0.10468  |
| 93 | C | 44    | 0.0869   |
| 93 | Q | 41    | 0.08098  |
| 93 | F | 35    | 0.06913  |
| 93 | L | 34    | 0.06715  |
| 93 | P | 33    | 0.06518  |
| 93 | W | 1     | 0.00198  |
| 94 | L | 49293 | 97.35735 |
| 94 | V | 597   | 1.17912  |
| 94 | P | 225   | 0.44439  |
| 94 | M | 184   | 0.36341  |
| 94 | A | 129   | 0.25478  |
| 94 | Q | 74    | 0.14616  |
| 94 | I | 71    | 0.14023  |
| 94 | T | 27    | 0.05333  |
| 94 | R | 17    | 0.03358  |
| 94 | S | 7     | 0.01383  |
| 94 | F | 3     | 0.00593  |
| 94 | H | 2     | 0.00395  |
| 94 | D | 1     | 0.00198  |
| 94 | K | 1     | 0.00198  |
| 95 | K | 37268 | 73.60708 |
| 95 | Q | 3070  | 6.06348  |
| 95 | E | 3065  | 6.0536   |
| 95 | R | 2248  | 4.43997  |
| 95 | T | 1738  | 3.43268  |
| 95 | N | 1400  | 2.7651   |
| 95 | S | 324   | 0.63992  |
| 95 | I | 316   | 0.62412  |
| 95 | M | 299   | 0.59055  |
| 95 | A | 246   | 0.48587  |
| 95 | L | 193   | 0.38119  |
| 95 | V | 157   | 0.31009  |
| 95 | G | 147   | 0.29034  |
| 95 | D | 86    | 0.16986  |
| 95 | H | 66    | 0.13035  |
| 95 | Y | 7     | 0.01383  |
| 95 | W | 1     | 0.00198  |

|    |   |       |          |
|----|---|-------|----------|
| 96 | P | 42389 | 83.72144 |
| 96 | T | 2288  | 4.51897  |
| 96 | S | 1838  | 3.63019  |
| 96 | A | 1098  | 2.16863  |
| 96 | L | 949   | 1.87435  |
| 96 | V | 815   | 1.60969  |
| 96 | I | 450   | 0.88878  |
| 96 | R | 186   | 0.36736  |
| 96 | F | 169   | 0.33379  |
| 96 | Q | 139   | 0.27454  |
| 96 | D | 115   | 0.22713  |
| 96 | H | 72    | 0.14221  |
| 96 | Y | 55    | 0.10863  |
| 96 | E | 40    | 0.079    |
| 96 | G | 10    | 0.01975  |
| 96 | N | 9     | 0.01778  |
| 96 | M | 6     | 0.01185  |
| 96 | C | 2     | 0.00395  |
| 96 | K | 1     | 0.00198  |
| 97 | E | 45003 | 88.88428 |
| 97 | D | 3844  | 7.59219  |
| 97 | G | 578   | 1.14159  |
| 97 | A | 301   | 0.5945   |
| 97 | N | 238   | 0.47007  |
| 97 | Q | 196   | 0.38711  |
| 97 | V | 125   | 0.24688  |
| 97 | K | 116   | 0.22911  |
| 97 | S | 94    | 0.18566  |
| 97 | L | 44    | 0.0869   |
| 97 | T | 39    | 0.07703  |
| 97 | M | 30    | 0.05925  |
| 97 | R | 10    | 0.01975  |
| 97 | Y | 6     | 0.01185  |
| 97 | H | 3     | 0.00593  |
| 97 | W | 3     | 0.00593  |
| 97 | P | 1     | 0.00198  |
| 98 | D | 50170 | 99.08949 |
| 98 | G | 165   | 0.32589  |
| 98 | E | 114   | 0.22516  |
| 98 | N | 74    | 0.14616  |
| 98 | V | 61    | 0.12048  |
| 98 | A | 23    | 0.04543  |
| 98 | Y | 15    | 0.02963  |
| 98 | H | 9     | 0.01778  |
| 99 | T | 45333 | 89.5449  |
| 99 | S | 4358  | 8.60823  |

|     |   |       |          |
|-----|---|-------|----------|
| 99  | A | 696   | 1.37479  |
| 99  | I | 67    | 0.13234  |
| 99  | G | 65    | 0.12839  |
| 99  | N | 35    | 0.06913  |
| 99  | M | 20    | 0.03951  |
| 99  | R | 16    | 0.0316   |
| 99  | P | 15    | 0.02963  |
| 99  | E | 10    | 0.01975  |
| 99  | C | 4     | 0.0079   |
| 99  | K | 3     | 0.00593  |
| 99  | D | 2     | 0.00395  |
| 99  | F | 1     | 0.00198  |
| 99  | V | 1     | 0.00198  |
| 100 | A | 43183 | 85.30818 |
| 100 | G | 6360  | 12.5642  |
| 100 | S | 576   | 1.13789  |
| 100 | D | 214   | 0.42276  |
| 100 | T | 104   | 0.20545  |
| 100 | V | 66    | 0.13038  |
| 100 | N | 39    | 0.07704  |
| 100 | R | 15    | 0.02963  |
| 100 | E | 13    | 0.02568  |
| 100 | H | 12    | 0.02371  |
| 100 | P | 12    | 0.02371  |
| 100 | Y | 11    | 0.02173  |
| 100 | W | 9     | 0.01778  |
| 100 | F | 3     | 0.00593  |
| 100 | C | 2     | 0.00395  |
| 100 | I | 1     | 0.00198  |
| 101 | M | 32770 | 64.73726 |
| 101 | V | 7662  | 15.13631 |
| 101 | T | 3816  | 7.53852  |
| 101 | I | 2765  | 5.46227  |
| 101 | L | 1279  | 2.52667  |
| 101 | R | 835   | 1.64955  |
| 101 | K | 758   | 1.49743  |
| 101 | A | 331   | 0.65389  |
| 101 | E | 174   | 0.34374  |
| 101 | N | 67    | 0.13236  |
| 101 | S | 55    | 0.10865  |
| 101 | D | 34    | 0.06717  |
| 101 | Q | 30    | 0.05927  |
| 101 | W | 21    | 0.04149  |
| 101 | G | 7     | 0.01383  |
| 101 | P | 7     | 0.01383  |
| 101 | F | 4     | 0.0079   |

|     |   |       |          |
|-----|---|-------|----------|
| 101 | H | 4     | 0.0079   |
| 101 | C | 1     | 0.00198  |
| 102 | Y | 50127 | 99.03195 |
| 102 | H | 166   | 0.32795  |
| 102 | C | 135   | 0.26671  |
| 102 | F | 124   | 0.24498  |
| 102 | N | 46    | 0.09088  |
| 102 | S | 9     | 0.01778  |
| 102 | D | 6     | 0.01185  |
| 102 | L | 2     | 0.00395  |
| 102 | R | 1     | 0.00198  |
| 102 | V | 1     | 0.00198  |
| 103 | Y | 44223 | 87.74753 |
| 103 | F | 1955  | 3.87912  |
| 103 | S | 1287  | 2.55367  |
| 103 | H | 693   | 1.37505  |
| 103 | I | 532   | 1.0556   |
| 103 | V | 470   | 0.93258  |
| 103 | T | 431   | 0.85519  |
| 103 | L | 168   | 0.33335  |
| 103 | N | 143   | 0.28374  |
| 103 | Q | 141   | 0.27977  |
| 103 | C | 122   | 0.24207  |
| 103 | R | 109   | 0.21628  |
| 103 | W | 68    | 0.13493  |
| 103 | A | 10    | 0.01984  |
| 103 | D | 10    | 0.01984  |
| 103 | M | 10    | 0.01984  |
| 103 | G | 9     | 0.01786  |
| 103 | P | 7     | 0.01389  |
| 103 | E | 5     | 0.00992  |
| 103 | K | 5     | 0.00992  |
| 104 | C | 50340 | 99.91465 |
| 104 | R | 20    | 0.0397   |
| 104 | Y | 12    | 0.02382  |
| 104 | W | 9     | 0.01786  |
| 104 | S | 2     | 0.00397  |
| 105 | A | 5162  | 94.85483 |
| 105 | V | 160   | 2.9401   |
| 105 | G | 45    | 0.8269   |
| 105 | S | 26    | 0.47777  |
| 105 | T | 24    | 0.44101  |
| 105 | L | 14    | 0.25726  |
| 105 | E | 8     | 0.147    |
| 105 | K | 2     | 0.03675  |
| 105 | P | 1     | 0.01838  |

|     |   |      |          |
|-----|---|------|----------|
| 106 | A | 4629 | 91.05035 |
| 106 | T | 167  | 3.28482  |
| 106 | V | 71   | 1.39654  |
| 106 | P | 63   | 1.23918  |
| 106 | S | 60   | 1.18017  |
| 106 | G | 35   | 0.68843  |
| 106 | E | 16   | 0.31471  |
| 106 | R | 12   | 0.23603  |
| 106 | L | 10   | 0.1967   |
| 106 | K | 9    | 0.17703  |
| 106 | I | 7    | 0.13769  |
| 106 | Q | 4    | 0.07868  |
| 106 | D | 1    | 0.01967  |



**Table S7: 3-VH**

| The positions of amino acids | Amino acids | Counts | Percentage(%) |
|------------------------------|-------------|--------|---------------|
| 1                            | H           | 28806  | 64.60483      |
| 1                            | D           | 9868   | 22.13152      |
| 1                            | Q           | 3719   | 8.34081       |
| 1                            | E           | 925    | 2.07455       |
| 1                            | S           | 606    | 1.35911       |
| 1                            | M           | 252    | 0.56517       |
| 1                            | L           | 124    | 0.2781        |
| 1                            | Y           | 65     | 0.14578       |
| 1                            | A           | 59     | 0.13232       |
| 1                            | P           | 37     | 0.08298       |
| 1                            | N           | 28     | 0.0628        |
| 1                            | R           | 28     | 0.0628        |
| 1                            | G           | 25     | 0.05607       |
| 1                            | C           | 17     | 0.03813       |
| 1                            | W           | 15     | 0.03364       |
| 1                            | V           | 6      | 0.01346       |
| 1                            | K           | 5      | 0.01121       |
| 1                            | I           | 3      | 0.00673       |
| 2                            | V           | 43738  | 97.67743      |
| 2                            | C           | 594    | 1.32654       |
| 2                            | M           | 105    | 0.23449       |
| 2                            | G           | 83     | 0.18536       |
| 2                            | L           | 79     | 0.17643       |
| 2                            | W           | 73     | 0.16303       |
| 2                            | A           | 36     | 0.0804        |
| 2                            | H           | 19     | 0.04243       |
| 2                            | S           | 14     | 0.03127       |
| 2                            | E           | 11     | 0.02457       |
| 2                            | Q           | 9      | 0.0201        |
| 2                            | D           | 8      | 0.01787       |
| 2                            | R           | 8      | 0.01787       |
| 2                            | F           | 1      | 0.00223       |
| 3                            | Q           | 45865  | 98.09017      |
| 3                            | A           | 493    | 1.05437       |
| 3                            | S           | 107    | 0.22884       |
| 3                            | C           | 63     | 0.13474       |
| 3                            | P           | 48     | 0.10266       |
| 3                            | V           | 35     | 0.07485       |
| 3                            | R           | 34     | 0.07271       |
| 3                            | K           | 32     | 0.06844       |
| 3                            | L           | 31     | 0.0663        |
| 3                            | E           | 28     | 0.05988       |
| 3                            | H           | 13     | 0.0278        |

|   |   |       |          |
|---|---|-------|----------|
| 3 | M | 4     | 0.00855  |
| 3 | W | 4     | 0.00855  |
| 3 | G | 1     | 0.00214  |
| 4 | L | 46239 | 98.39341 |
| 4 | A | 420   | 0.89373  |
| 4 | W | 107   | 0.22769  |
| 4 | P | 50    | 0.1064   |
| 4 | S | 48    | 0.10214  |
| 4 | V | 47    | 0.10001  |
| 4 | Q | 39    | 0.08299  |
| 4 | M | 28    | 0.05958  |
| 4 | R | 9     | 0.01915  |
| 4 | E | 3     | 0.00638  |
| 4 | C | 2     | 0.00426  |
| 4 | G | 2     | 0.00426  |
| 5 | V | 46646 | 98.79069 |
| 5 | G | 328   | 0.69467  |
| 5 | W | 129   | 0.27321  |
| 5 | L | 33    | 0.06989  |
| 5 | E | 25    | 0.05295  |
| 5 | A | 23    | 0.04871  |
| 5 | M | 23    | 0.04871  |
| 5 | S | 5     | 0.01059  |
| 5 | F | 3     | 0.00635  |
| 5 | D | 1     | 0.00212  |
| 5 | T | 1     | 0.00212  |
| 6 | E | 46806 | 98.91378 |
| 6 | G | 280   | 0.59172  |
| 6 | S | 64    | 0.13525  |
| 6 | M | 46    | 0.09721  |
| 6 | W | 31    | 0.06551  |
| 6 | A | 30    | 0.0634   |
| 6 | V | 25    | 0.05283  |
| 6 | K | 19    | 0.04015  |
| 6 | D | 7     | 0.01479  |
| 6 | R | 5     | 0.01057  |
| 6 | Q | 3     | 0.00634  |
| 6 | L | 2     | 0.00423  |
| 6 | H | 1     | 0.00211  |
| 6 | Y | 1     | 0.00211  |
| 7 | S | 46929 | 99.00633 |
| 7 | V | 241   | 0.50844  |
| 7 | L | 60    | 0.12658  |
| 7 | A | 58    | 0.12236  |
| 7 | F | 29    | 0.06118  |
| 7 | Y | 29    | 0.06118  |

|    |    |       |          |
|----|----|-------|----------|
| 7  | P  | 23    | 0.04852  |
| 7  | T  | 10    | 0.0211   |
| 7  | E  | 7     | 0.01477  |
| 7  | G  | 7     | 0.01477  |
| 7  | C  | 2     | 0.00422  |
| 7  | H  | 2     | 0.00422  |
| 7  | D  | 1     | 0.00211  |
| 7  | Q  | 1     | 0.00211  |
| 7  | W  | 1     | 0.00211  |
| 8  | G  | 47041 | 99.17984 |
| 8  | W  | 252   | 0.53131  |
| 8  | L  | 31    | 0.06536  |
| 8  | H  | 30    | 0.06325  |
| 8  | R  | 22    | 0.04638  |
| 8  | E  | 17    | 0.03584  |
| 8  | D  | 15    | 0.03163  |
| 8  | S  | 9     | 0.01898  |
| 8  | V  | 4     | 0.00843  |
| 8  | P  | 3     | 0.00633  |
| 8  | Q  | 3     | 0.00633  |
| 8  | A  | 2     | 0.00422  |
| 8  | C  | 1     | 0.00211  |
| 9  | G  | 47176 | 99.3409  |
| 9  | E  | 106   | 0.22321  |
| 9  | R  | 77    | 0.16214  |
| 9  | V  | 68    | 0.14319  |
| 9  | M  | 33    | 0.06949  |
| 9  | A  | 10    | 0.02106  |
| 9  | C  | 3     | 0.00632  |
| 9  | L  | 3     | 0.00632  |
| 9  | P  | 3     | 0.00632  |
| 9  | W  | 3     | 0.00632  |
| 9  | D  | 2     | 0.00421  |
| 9  | Q  | 2     | 0.00421  |
| 9  | K  | 1     | 0.00211  |
| 9  | S  | 1     | 0.00211  |
| 9  | T  | 1     | 0.00211  |
| 10 | NA | 0     | 0        |
| 11 | G  | 39985 | 84.14706 |
| 11 | D  | 4926  | 10.3666  |
| 11 | A  | 1004  | 2.11288  |
| 11 | S  | 413   | 0.86914  |
| 11 | E  | 406   | 0.85441  |
| 11 | R  | 189   | 0.39774  |
| 11 | N  | 170   | 0.35776  |
| 11 | T  | 168   | 0.35355  |

|    |   |       |          |
|----|---|-------|----------|
| 11 | V | 103   | 0.21676  |
| 11 | Q | 53    | 0.11154  |
| 11 | H | 37    | 0.07787  |
| 11 | K | 28    | 0.05893  |
| 11 | C | 20    | 0.04209  |
| 11 | L | 5     | 0.01052  |
| 11 | W | 4     | 0.00842  |
| 11 | F | 3     | 0.00631  |
| 11 | M | 2     | 0.00421  |
| 11 | Y | 2     | 0.00421  |
| 12 | L | 38255 | 80.47924 |
| 12 | S | 7644  | 16.08112 |
| 12 | V | 454   | 0.95511  |
| 12 | T | 220   | 0.46283  |
| 12 | F | 205   | 0.43127  |
| 12 | A | 156   | 0.32819  |
| 12 | W | 138   | 0.29032  |
| 12 | M | 133   | 0.2798   |
| 12 | Q | 95    | 0.19986  |
| 12 | P | 77    | 0.16199  |
| 12 | E | 37    | 0.07784  |
| 12 | H | 36    | 0.07574  |
| 12 | R | 27    | 0.0568   |
| 12 | D | 16    | 0.03366  |
| 12 | Y | 16    | 0.03366  |
| 12 | K | 15    | 0.03156  |
| 12 | I | 5     | 0.01052  |
| 12 | G | 4     | 0.00842  |
| 12 | N | 1     | 0.0021   |
| 13 | V | 46056 | 96.86008 |
| 13 | A | 879   | 1.84862  |
| 13 | M | 152   | 0.31967  |
| 13 | L | 151   | 0.31757  |
| 13 | G | 122   | 0.25658  |
| 13 | E | 80    | 0.16825  |
| 13 | I | 41    | 0.08623  |
| 13 | C | 26    | 0.05468  |
| 13 | T | 13    | 0.02734  |
| 13 | R | 7     | 0.01472  |
| 13 | W | 6     | 0.01262  |
| 13 | Q | 5     | 0.01052  |
| 13 | K | 4     | 0.00841  |
| 13 | S | 4     | 0.00841  |
| 13 | P | 2     | 0.00421  |
| 13 | N | 1     | 0.0021   |
| 14 | Q | 43326 | 91.10139 |

|    |   |       |          |
|----|---|-------|----------|
| 14 | R | 1681  | 3.53463  |
| 14 | E | 718   | 1.50974  |
| 14 | H | 595   | 1.2511   |
| 14 | K | 406   | 0.85369  |
| 14 | L | 300   | 0.63081  |
| 14 | P | 281   | 0.59086  |
| 14 | A | 84    | 0.17663  |
| 14 | S | 46    | 0.09672  |
| 14 | G | 29    | 0.06098  |
| 14 | T | 29    | 0.06098  |
| 14 | N | 22    | 0.04626  |
| 14 | C | 10    | 0.02103  |
| 14 | D | 8     | 0.01682  |
| 14 | V | 7     | 0.01472  |
| 14 | Y | 7     | 0.01472  |
| 14 | M | 5     | 0.01051  |
| 14 | W | 4     | 0.00841  |
| 15 | P | 40125 | 84.35825 |
| 15 | A | 5764  | 12.11815 |
| 15 | T | 628   | 1.3203   |
| 15 | S | 405   | 0.85147  |
| 15 | V | 219   | 0.46042  |
| 15 | L | 122   | 0.25649  |
| 15 | D | 62    | 0.13035  |
| 15 | I | 56    | 0.11773  |
| 15 | F | 49    | 0.10302  |
| 15 | G | 34    | 0.07148  |
| 15 | N | 34    | 0.07148  |
| 15 | R | 24    | 0.05046  |
| 15 | H | 21    | 0.04415  |
| 15 | E | 11    | 0.02313  |
| 15 | Y | 5     | 0.01051  |
| 15 | Q | 4     | 0.00841  |
| 15 | C | 1     | 0.0021   |
| 15 | M | 1     | 0.0021   |
| 16 | G | 46976 | 98.71189 |
| 16 | R | 270   | 0.56736  |
| 16 | E | 144   | 0.30259  |
| 16 | W | 100   | 0.21013  |
| 16 | A | 33    | 0.06934  |
| 16 | D | 26    | 0.05463  |
| 16 | V | 25    | 0.05253  |
| 16 | L | 8     | 0.01681  |
| 16 | S | 4     | 0.00841  |
| 16 | C | 1     | 0.0021   |
| 16 | M | 1     | 0.0021   |

|    |   |       |          |
|----|---|-------|----------|
| 16 | T | 1     | 0.0021   |
| 17 | G | 44334 | 93.13474 |
| 17 | E | 1603  | 3.36751  |
| 17 | R | 471   | 0.98945  |
| 17 | D | 350   | 0.73526  |
| 17 | A | 194   | 0.40755  |
| 17 | V | 160   | 0.33612  |
| 17 | K | 133   | 0.2794   |
| 17 | N | 85    | 0.17856  |
| 17 | Q | 77    | 0.16176  |
| 17 | W | 67    | 0.14075  |
| 17 | S | 45    | 0.09453  |
| 17 | T | 43    | 0.09033  |
| 17 | M | 19    | 0.03991  |
| 17 | H | 13    | 0.02731  |
| 17 | L | 4     | 0.0084   |
| 17 | Y | 3     | 0.0063   |
| 17 | C | 1     | 0.0021   |
| 18 | S | 46817 | 98.22092 |
| 18 | T | 284   | 0.59583  |
| 18 | P | 219   | 0.45946  |
| 18 | F | 132   | 0.27693  |
| 18 | A | 101   | 0.2119   |
| 18 | Y | 38    | 0.07972  |
| 18 | D | 13    | 0.02727  |
| 18 | R | 12    | 0.02518  |
| 18 | V | 12    | 0.02518  |
| 18 | C | 9     | 0.01888  |
| 18 | M | 7     | 0.01469  |
| 18 | G | 5     | 0.01049  |
| 18 | L | 4     | 0.00839  |
| 18 | E | 3     | 0.00629  |
| 18 | I | 3     | 0.00629  |
| 18 | H | 2     | 0.0042   |
| 18 | N | 2     | 0.0042   |
| 18 | Q | 1     | 0.0021   |
| 18 | W | 1     | 0.0021   |
| 19 | L | 46206 | 96.83544 |
| 19 | V | 468   | 0.9808   |
| 19 | M | 389   | 0.81524  |
| 19 | P | 211   | 0.4422   |
| 19 | R | 183   | 0.38352  |
| 19 | Q | 113   | 0.23682  |
| 19 | A | 58    | 0.12155  |
| 19 | S | 23    | 0.0482   |
| 19 | T | 20    | 0.04191  |

|    |   |       |          |
|----|---|-------|----------|
| 19 | H | 17    | 0.03563  |
| 19 | I | 13    | 0.02724  |
| 19 | W | 5     | 0.01048  |
| 19 | E | 4     | 0.00838  |
| 19 | F | 2     | 0.00419  |
| 19 | G | 2     | 0.00419  |
| 19 | K | 2     | 0.00419  |
| 20 | R | 39527 | 82.8016  |
| 20 | T | 4512  | 9.45179  |
| 20 | K | 1185  | 2.48235  |
| 20 | S | 874   | 1.83086  |
| 20 | V | 692   | 1.44961  |
| 20 | G | 317   | 0.66406  |
| 20 | I | 291   | 0.60959  |
| 20 | N | 97    | 0.2032   |
| 20 | Q | 67    | 0.14035  |
| 20 | M | 60    | 0.12569  |
| 20 | L | 45    | 0.09427  |
| 20 | A | 41    | 0.08589  |
| 20 | E | 16    | 0.03352  |
| 20 | D | 6     | 0.01257  |
| 20 | C | 5     | 0.01047  |
| 20 | H | 1     | 0.00209  |
| 20 | P | 1     | 0.00209  |
| 21 | L | 45723 | 95.61281 |
| 21 | V | 1312  | 2.74356  |
| 21 | I | 295   | 0.61688  |
| 21 | P | 231   | 0.48305  |
| 21 | F | 111   | 0.23212  |
| 21 | H | 78    | 0.16311  |
| 21 | G | 36    | 0.07528  |
| 21 | R | 13    | 0.02718  |
| 21 | A | 10    | 0.02091  |
| 21 | M | 6     | 0.01255  |
| 21 | T | 2     | 0.00418  |
| 21 | E | 1     | 0.00209  |
| 21 | Q | 1     | 0.00209  |
| 21 | S | 1     | 0.00209  |
| 21 | W | 1     | 0.00209  |
| 22 | S | 45967 | 96.02064 |
| 22 | A | 712   | 1.4873   |
| 22 | T | 637   | 1.33063  |
| 22 | P | 229   | 0.47836  |
| 22 | F | 72    | 0.1504   |
| 22 | D | 47    | 0.09818  |
| 22 | R | 41    | 0.08565  |

|    |   |       |          |
|----|---|-------|----------|
| 22 | V | 32    | 0.06684  |
| 22 | L | 25    | 0.05222  |
| 22 | I | 24    | 0.05013  |
| 22 | G | 23    | 0.04804  |
| 22 | Y | 22    | 0.04596  |
| 22 | N | 11    | 0.02298  |
| 22 | Q | 8     | 0.01671  |
| 22 | K | 7     | 0.01462  |
| 22 | C | 6     | 0.01253  |
| 22 | H | 5     | 0.01044  |
| 22 | E | 3     | 0.00627  |
| 22 | W | 1     | 0.00209  |
| 23 | C | 47469 | 99.07125 |
| 23 | R | 205   | 0.42785  |
| 23 | S | 86    | 0.17949  |
| 23 | Y | 81    | 0.16905  |
| 23 | G | 26    | 0.05426  |
| 23 | W | 20    | 0.04174  |
| 23 | F | 12    | 0.02504  |
| 23 | L | 11    | 0.02296  |
| 23 | V | 2     | 0.00417  |
| 23 | A | 1     | 0.00209  |
| 23 | E | 1     | 0.00209  |
| 24 | A | 32589 | 67.96313 |
| 24 | V | 6577  | 13.71609 |
| 24 | T | 3995  | 8.33142  |
| 24 | E | 1378  | 2.87377  |
| 24 | S | 1034  | 2.15637  |
| 24 | G | 635   | 1.32427  |
| 24 | L | 433   | 0.90301  |
| 24 | I | 324   | 0.67569  |
| 24 | R | 283   | 0.59019  |
| 24 | K | 267   | 0.55682  |
| 24 | Q | 199   | 0.41501  |
| 24 | D | 151   | 0.3149   |
| 24 | P | 24    | 0.05005  |
| 24 | H | 21    | 0.04379  |
| 24 | N | 20    | 0.04171  |
| 24 | F | 10    | 0.02085  |
| 24 | M | 6     | 0.01251  |
| 24 | Y | 3     | 0.00626  |
| 24 | C | 2     | 0.00417  |
| 25 | A | 39096 | 81.43643 |
| 25 | T | 2765  | 5.75946  |
| 25 | G | 2452  | 5.10748  |
| 25 | V | 2188  | 4.55757  |



|    |   |       |          |
|----|---|-------|----------|
| 25 | S | 327   | 0.68114  |
| 25 | Y | 253   | 0.527    |
| 25 | P | 246   | 0.51241  |
| 25 | F | 185   | 0.38535  |
| 25 | I | 134   | 0.27912  |
| 25 | L | 124   | 0.25829  |
| 25 | D | 68    | 0.14164  |
| 25 | C | 58    | 0.12081  |
| 25 | H | 36    | 0.07499  |
| 25 | M | 22    | 0.04583  |
| 25 | E | 19    | 0.03958  |
| 25 | R | 14    | 0.02916  |
| 25 | W | 10    | 0.02083  |
| 25 | N | 8     | 0.01666  |
| 25 | Q | 2     | 0.00417  |
| 25 | K | 1     | 0.00208  |
| 26 | S | 45840 | 95.41452 |
| 26 | T | 755   | 1.57151  |
| 26 | F | 354   | 0.73684  |
| 26 | P | 315   | 0.65566  |
| 26 | A | 307   | 0.63901  |
| 26 | D | 155   | 0.32263  |
| 26 | Y | 83    | 0.17276  |
| 26 | L | 63    | 0.13113  |
| 26 | V | 32    | 0.06661  |
| 26 | I | 28    | 0.05828  |
| 26 | R | 26    | 0.05412  |
| 26 | G | 21    | 0.04371  |
| 26 | H | 21    | 0.04371  |
| 26 | N | 16    | 0.0333   |
| 26 | C | 7     | 0.01457  |
| 26 | E | 6     | 0.01249  |
| 26 | K | 5     | 0.01041  |
| 26 | Q | 4     | 0.00833  |
| 26 | W | 4     | 0.00833  |
| 26 | M | 1     | 0.00208  |
| 27 | G | 45406 | 94.4738  |
| 27 | E | 798   | 1.66036  |
| 27 | R | 608   | 1.26503  |
| 27 | A | 298   | 0.62003  |
| 27 | T | 191   | 0.3974   |
| 27 | Q | 141   | 0.29337  |
| 27 | D | 131   | 0.27256  |
| 27 | V | 119   | 0.2476   |
| 27 | N | 105   | 0.21847  |
| 27 | S | 71    | 0.14773  |

|    |   |       |          |
|----|---|-------|----------|
| 27 | K | 55    | 0.11444  |
| 27 | L | 51    | 0.10611  |
| 27 | P | 30    | 0.06242  |
| 27 | I | 28    | 0.05826  |
| 27 | M | 10    | 0.02081  |
| 27 | W | 8     | 0.01665  |
| 27 | F | 5     | 0.0104   |
| 27 | Y | 4     | 0.00832  |
| 27 | C | 2     | 0.00416  |
| 27 | H | 1     | 0.00208  |
| 28 | F | 41781 | 86.88808 |
| 28 | L | 1728  | 3.59356  |
| 28 | Y | 1383  | 2.8761   |
| 28 | I | 830   | 1.72607  |
| 28 | S | 781   | 1.62417  |
| 28 | V | 372   | 0.77361  |
| 28 | W | 245   | 0.5095   |
| 28 | D | 243   | 0.50534  |
| 28 | A | 169   | 0.35145  |
| 28 | N | 110   | 0.22876  |
| 28 | G | 104   | 0.21628  |
| 28 | H | 79    | 0.16429  |
| 28 | T | 68    | 0.14141  |
| 28 | R | 58    | 0.12062  |
| 28 | P | 56    | 0.11646  |
| 28 | C | 30    | 0.06239  |
| 28 | E | 22    | 0.04575  |
| 28 | K | 9     | 0.01872  |
| 28 | M | 9     | 0.01872  |
| 28 | Q | 9     | 0.01872  |
| 29 | T | 34512 | 71.72368 |
| 29 | S | 2787  | 5.79201  |
| 29 | A | 2772  | 5.76084  |
| 29 | I | 1871  | 3.88836  |
| 29 | P | 1359  | 2.82431  |
| 29 | V | 927   | 1.92651  |
| 29 | R | 764   | 1.58776  |
| 29 | Q | 531   | 1.10354  |
| 29 | K | 517   | 1.07444  |
| 29 | D | 503   | 1.04535  |
| 29 | N | 417   | 0.86662  |
| 29 | G | 267   | 0.55489  |
| 29 | E | 235   | 0.48838  |
| 29 | M | 230   | 0.47799  |
| 29 | L | 183   | 0.38032  |
| 29 | F | 128   | 0.26601  |

|    |   |       |          |
|----|---|-------|----------|
| 29 | Y | 63    | 0.13093  |
| 29 | W | 24    | 0.04988  |
| 29 | H | 23    | 0.0478   |
| 29 | C | 5     | 0.01039  |
| 30 | F | 40400 | 83.91492 |
| 30 | L | 1631  | 3.38775  |
| 30 | S | 1577  | 3.27559  |
| 30 | Y | 1187  | 2.46552  |
| 30 | V | 876   | 1.81954  |
| 30 | I | 555   | 1.15279  |
| 30 | A | 435   | 0.90354  |
| 30 | M | 225   | 0.46735  |
| 30 | T | 222   | 0.46112  |
| 30 | G | 209   | 0.43411  |
| 30 | D | 174   | 0.36142  |
| 30 | Q | 150   | 0.31157  |
| 30 | P | 103   | 0.21394  |
| 30 | R | 102   | 0.21186  |
| 30 | W | 91    | 0.18902  |
| 30 | E | 65    | 0.13501  |
| 30 | N | 58    | 0.12047  |
| 30 | H | 38    | 0.07893  |
| 30 | K | 24    | 0.04985  |
| 30 | C | 22    | 0.0457   |
| 31 | S | 35032 | 72.74237 |
| 31 | R | 2555  | 5.30534  |
| 31 | G | 2416  | 5.01672  |
| 31 | N | 2258  | 4.68864  |
| 31 | T | 1924  | 3.9951   |
| 31 | D | 1342  | 2.7866   |
| 31 | A | 919   | 1.90826  |
| 31 | E | 409   | 0.84927  |
| 31 | K | 351   | 0.72884  |
| 31 | V | 217   | 0.45059  |
| 31 | I | 142   | 0.29486  |
| 31 | C | 123   | 0.2554   |
| 31 | H | 85    | 0.1765   |
| 31 | P | 84    | 0.17442  |
| 31 | Y | 84    | 0.17442  |
| 31 | M | 56    | 0.11628  |
| 31 | F | 51    | 0.1059   |
| 31 | Q | 44    | 0.09136  |
| 31 | W | 35    | 0.07268  |
| 31 | L | 32    | 0.06645  |
| 32 | S | 14025 | 29.1114  |
| 32 | T | 7726  | 16.0367  |

|    |   |       |          |
|----|---|-------|----------|
| 32 | N | 6993  | 14.51523 |
| 32 | D | 5458  | 11.32906 |
| 32 | G | 3401  | 7.05939  |
| 32 | R | 3384  | 7.0241   |
| 32 | A | 1536  | 3.18824  |
| 32 | I | 872   | 1.80999  |
| 32 | K | 677   | 1.40523  |
| 32 | L | 652   | 1.35334  |
| 32 | V | 617   | 1.28069  |
| 32 | H | 572   | 1.18729  |
| 32 | Y | 513   | 1.06482  |
| 32 | E | 486   | 1.00878  |
| 32 | M | 461   | 0.95689  |
| 32 | P | 297   | 0.61648  |
| 32 | F | 221   | 0.45873  |
| 32 | Q | 185   | 0.384    |
| 32 | W | 66    | 0.13699  |
| 32 | C | 35    | 0.07265  |
| 33 | Y | 30670 | 63.61355 |
| 33 | H | 2645  | 5.48607  |
| 33 | A | 2317  | 4.80576  |
| 33 | S | 2270  | 4.70827  |
| 33 | N | 2257  | 4.68131  |
| 33 | F | 1592  | 3.30201  |
| 33 | V | 1512  | 3.13608  |
| 33 | T | 1194  | 2.47651  |
| 33 | R | 596   | 1.23618  |
| 33 | L | 591   | 1.22581  |
| 33 | D | 556   | 1.15322  |
| 33 | W | 382   | 0.79232  |
| 33 | K | 303   | 0.62846  |
| 33 | I | 299   | 0.62016  |
| 33 | C | 294   | 0.60979  |
| 33 | G | 236   | 0.48949  |
| 33 | Q | 177   | 0.36712  |
| 33 | E | 174   | 0.3609   |
| 33 | M | 90    | 0.18667  |
| 33 | P | 58    | 0.1203   |
| 34 | W | 10691 | 22.15109 |
| 34 | Y | 9852  | 20.41273 |
| 34 | A | 7215  | 14.94903 |
| 34 | D | 4340  | 8.99221  |
| 34 | G | 2757  | 5.71233  |
| 34 | T | 2347  | 4.86284  |
| 34 | S | 2242  | 4.64528  |
| 34 | C | 1770  | 3.66733  |

|    |    |       |          |
|----|----|-------|----------|
| 34 | P  | 1449  | 3.00224  |
| 34 | F  | 1361  | 2.81991  |
| 34 | V  | 1284  | 2.66037  |
| 34 | H  | 819   | 1.69692  |
| 34 | R  | 693   | 1.43585  |
| 34 | L  | 403   | 0.83499  |
| 34 | Q  | 329   | 0.68167  |
| 34 | E  | 264   | 0.54699  |
| 34 | N  | 201   | 0.41646  |
| 34 | I  | 196   | 0.4061   |
| 34 | M  | 43    | 0.08909  |
| 34 | K  | 8     | 0.01658  |
| 35 | NA | 0     | 0        |
| 36 | NA | 0     | 0        |
| 37 | NA | 0     | 0        |
| 38 | NA | 0     | 0        |
| 39 | M  | 42080 | 87.05546 |
| 39 | I  | 2738  | 5.6644   |
| 39 | L  | 1446  | 2.9915   |
| 39 | V  | 1154  | 2.38741  |
| 39 | T  | 348   | 0.71995  |
| 39 | F  | 208   | 0.43031  |
| 39 | W  | 73    | 0.15102  |
| 39 | A  | 70    | 0.14482  |
| 39 | K  | 70    | 0.14482  |
| 39 | Q  | 37    | 0.07655  |
| 39 | R  | 34    | 0.07034  |
| 39 | S  | 24    | 0.04965  |
| 39 | G  | 21    | 0.04344  |
| 39 | D  | 11    | 0.02276  |
| 39 | P  | 9     | 0.01862  |
| 39 | C  | 5     | 0.01034  |
| 39 | E  | 3     | 0.00621  |
| 39 | H  | 2     | 0.00414  |
| 39 | N  | 2     | 0.00414  |
| 39 | Y  | 2     | 0.00414  |
| 40 | S  | 17321 | 35.73035 |
| 40 | Y  | 9923  | 20.4695  |
| 40 | T  | 6600  | 13.6147  |
| 40 | N  | 4310  | 8.89081  |
| 40 | G  | 2544  | 5.24785  |
| 40 | A  | 2137  | 4.40828  |
| 40 | H  | 1533  | 3.16232  |
| 40 | R  | 1104  | 2.27737  |
| 40 | I  | 866   | 1.78641  |
| 40 | F  | 847   | 1.74722  |

|    |   |       |          |
|----|---|-------|----------|
| 40 | M | 356   | 0.73437  |
| 40 | D | 205   | 0.42288  |
| 40 | C | 160   | 0.33005  |
| 40 | L | 160   | 0.33005  |
| 40 | W | 153   | 0.31561  |
| 40 | V | 144   | 0.29705  |
| 40 | K | 59    | 0.12171  |
| 40 | Q | 28    | 0.05776  |
| 40 | E | 17    | 0.03507  |
| 40 | P | 10    | 0.02063  |
| 41 | W | 48416 | 99.28636 |
| 41 | R | 215   | 0.4409   |
| 41 | Y | 43    | 0.08818  |
| 41 | C | 39    | 0.07998  |
| 41 | L | 18    | 0.03691  |
| 41 | G | 13    | 0.02666  |
| 41 | F | 6     | 0.0123   |
| 41 | V | 6     | 0.0123   |
| 41 | S | 5     | 0.01025  |
| 41 | H | 2     | 0.0041   |
| 41 | N | 1     | 0.00205  |
| 42 | V | 43209 | 87.95904 |
| 42 | I | 2257  | 4.5945   |
| 42 | F | 1893  | 3.85351  |
| 42 | A | 734   | 1.49418  |
| 42 | L | 604   | 1.22954  |
| 42 | Y | 197   | 0.40103  |
| 42 | D | 72    | 0.14657  |
| 42 | G | 38    | 0.07736  |
| 42 | S | 32    | 0.06514  |
| 42 | T | 28    | 0.057    |
| 42 | H | 20    | 0.04071  |
| 42 | P | 9     | 0.01832  |
| 42 | M | 8     | 0.01629  |
| 42 | E | 7     | 0.01425  |
| 42 | K | 6     | 0.01221  |
| 42 | Q | 3     | 0.00611  |
| 42 | R | 3     | 0.00611  |
| 42 | W | 3     | 0.00611  |
| 42 | C | 1     | 0.00204  |
| 43 | R | 49023 | 99.23684 |
| 43 | H | 144   | 0.2915   |
| 43 | C | 114   | 0.23077  |
| 43 | S | 34    | 0.06883  |
| 43 | P | 22    | 0.04453  |
| 43 | L | 21    | 0.04251  |

|    |   |       |          |
|----|---|-------|----------|
| 43 | G | 12    | 0.02429  |
| 43 | W | 10    | 0.02024  |
| 43 | Q | 7     | 0.01417  |
| 43 | T | 5     | 0.01012  |
| 43 | A | 4     | 0.0081   |
| 43 | F | 2     | 0.00405  |
| 43 | K | 1     | 0.00202  |
| 43 | V | 1     | 0.00202  |
| 44 | Q | 47725 | 96.33435 |
| 44 | R | 822   | 1.65923  |
| 44 | L | 397   | 0.80136  |
| 44 | H | 337   | 0.68024  |
| 44 | E | 93    | 0.18772  |
| 44 | K | 54    | 0.109    |
| 44 | P | 32    | 0.06459  |
| 44 | M | 29    | 0.05854  |
| 44 | W | 17    | 0.03432  |
| 44 | S | 11    | 0.0222   |
| 44 | D | 6     | 0.01211  |
| 44 | V | 6     | 0.01211  |
| 44 | A | 5     | 0.01009  |
| 44 | G | 3     | 0.00606  |
| 44 | T | 2     | 0.00404  |
| 44 | Y | 2     | 0.00404  |
| 45 | A | 42117 | 84.91331 |
| 45 | T | 3094  | 6.2379   |
| 45 | V | 1628  | 3.28226  |
| 45 | G | 741   | 1.49395  |
| 45 | P | 596   | 1.20161  |
| 45 | S | 556   | 1.12097  |
| 45 | R | 311   | 0.62702  |
| 45 | L | 131   | 0.26411  |
| 45 | N | 111   | 0.22379  |
| 45 | I | 84    | 0.16935  |
| 45 | F | 76    | 0.15323  |
| 45 | D | 67    | 0.13508  |
| 45 | H | 26    | 0.05242  |
| 45 | C | 20    | 0.04032  |
| 45 | K | 15    | 0.03024  |
| 45 | Q | 12    | 0.02419  |
| 45 | Y | 6     | 0.0121   |
| 45 | E | 5     | 0.01008  |
| 45 | M | 3     | 0.00605  |
| 45 | W | 1     | 0.00202  |
| 46 | P | 47862 | 96.30762 |
| 46 | A | 445   | 0.89543  |

|    |   |       |          |
|----|---|-------|----------|
| 46 | L | 394   | 0.7928   |
| 46 | S | 353   | 0.7103   |
| 46 | Q | 292   | 0.58756  |
| 46 | R | 150   | 0.30183  |
| 46 | T | 59    | 0.11872  |
| 46 | E | 56    | 0.11268  |
| 46 | H | 34    | 0.06841  |
| 46 | D | 18    | 0.03622  |
| 46 | K | 10    | 0.02012  |
| 46 | N | 6     | 0.01207  |
| 46 | W | 6     | 0.01207  |
| 46 | M | 4     | 0.00805  |
| 46 | C | 3     | 0.00604  |
| 46 | I | 2     | 0.00402  |
| 46 | V | 2     | 0.00402  |
| 46 | Y | 1     | 0.00201  |
| 47 | G | 46729 | 93.94274 |
| 47 | A | 1939  | 3.89811  |
| 47 | E | 496   | 0.99715  |
| 47 | R | 215   | 0.43223  |
| 47 | V | 143   | 0.28748  |
| 47 | D | 85    | 0.17088  |
| 47 | W | 49    | 0.09851  |
| 47 | N | 24    | 0.04825  |
| 47 | T | 20    | 0.04021  |
| 47 | L | 13    | 0.02613  |
| 47 | S | 11    | 0.02211  |
| 47 | Q | 8     | 0.01608  |
| 47 | K | 5     | 0.01005  |
| 47 | C | 2     | 0.00402  |
| 47 | H | 1     | 0.00201  |
| 47 | M | 1     | 0.00201  |
| 47 | P | 1     | 0.00201  |
| 48 | K | 47240 | 94.88421 |
| 48 | Q | 679   | 1.36381  |
| 48 | R | 568   | 1.14086  |
| 48 | E | 441   | 0.88577  |
| 48 | N | 270   | 0.54231  |
| 48 | M | 151   | 0.30329  |
| 48 | T | 143   | 0.28722  |
| 48 | L | 78    | 0.15667  |
| 48 | S | 75    | 0.15064  |
| 48 | A | 60    | 0.12051  |
| 48 | G | 59    | 0.1185   |
| 48 | V | 8     | 0.01607  |
| 48 | H | 5     | 0.01004  |



|    |   |       |          |
|----|---|-------|----------|
| 48 | W | 3     | 0.00603  |
| 48 | D | 2     | 0.00402  |
| 48 | I | 2     | 0.00402  |
| 48 | P | 2     | 0.00402  |
| 48 | Y | 1     | 0.00201  |
| 49 | G | 46393 | 93.08947 |
| 49 | E | 1783  | 3.57766  |
| 49 | A | 682   | 1.36846  |
| 49 | D | 297   | 0.59594  |
| 49 | R | 254   | 0.50966  |
| 49 | H | 94    | 0.18861  |
| 49 | V | 67    | 0.13444  |
| 49 | K | 64    | 0.12842  |
| 49 | Q | 50    | 0.10033  |
| 49 | P | 34    | 0.06822  |
| 49 | S | 30    | 0.0602   |
| 49 | W | 26    | 0.05217  |
| 49 | L | 24    | 0.04816  |
| 49 | T | 19    | 0.03812  |
| 49 | C | 12    | 0.02408  |
| 49 | N | 3     | 0.00602  |
| 49 | F | 2     | 0.00401  |
| 49 | M | 2     | 0.00401  |
| 49 | I | 1     | 0.00201  |
| 50 | L | 44899 | 89.95452 |
| 50 | R | 1733  | 3.47204  |
| 50 | P | 1369  | 2.74277  |
| 50 | F | 990   | 1.98345  |
| 50 | V | 464   | 0.92962  |
| 50 | I | 153   | 0.30653  |
| 50 | H | 87    | 0.1743   |
| 50 | M | 61    | 0.12221  |
| 50 | Q | 40    | 0.08014  |
| 50 | Y | 28    | 0.0561   |
| 50 | C | 26    | 0.05209  |
| 50 | S | 21    | 0.04207  |
| 50 | A | 12    | 0.02404  |
| 50 | W | 9     | 0.01803  |
| 50 | G | 6     | 0.01202  |
| 50 | T | 6     | 0.01202  |
| 50 | D | 5     | 0.01002  |
| 50 | E | 3     | 0.00601  |
| 50 | K | 1     | 0.002    |
| 51 | E | 48139 | 96.3358  |
| 51 | D | 763   | 1.52692  |
| 51 | Q | 404   | 0.80849  |

|    |   |       |          |
|----|---|-------|----------|
| 51 | G | 195   | 0.39023  |
| 51 | K | 139   | 0.27817  |
| 51 | A | 123   | 0.24615  |
| 51 | V | 107   | 0.21413  |
| 51 | R | 28    | 0.05603  |
| 51 | L | 21    | 0.04203  |
| 51 | W | 16    | 0.03202  |
| 51 | T | 14    | 0.02802  |
| 51 | S | 6     | 0.01201  |
| 51 | N | 4     | 0.008    |
| 51 | Y | 4     | 0.008    |
| 51 | M | 3     | 0.006    |
| 51 | H | 2     | 0.004    |
| 51 | F | 1     | 0.002    |
| 51 | I | 1     | 0.002    |
| 52 | W | 46883 | 93.68917 |
| 52 | G | 1153  | 2.30411  |
| 52 | R | 584   | 1.16704  |
| 52 | Y | 516   | 1.03115  |
| 52 | C | 328   | 0.65546  |
| 52 | L | 184   | 0.3677   |
| 52 | S | 89    | 0.17785  |
| 52 | F | 83    | 0.16586  |
| 52 | A | 72    | 0.14388  |
| 52 | V | 49    | 0.09792  |
| 52 | E | 34    | 0.06794  |
| 52 | H | 16    | 0.03197  |
| 52 | M | 12    | 0.02398  |
| 52 | P | 9     | 0.01799  |
| 52 | D | 7     | 0.01399  |
| 52 | T | 6     | 0.01199  |
| 52 | Q | 5     | 0.00999  |
| 52 | I | 4     | 0.00799  |
| 52 | K | 4     | 0.00799  |
| 52 | N | 3     | 0.006    |
| 53 | V | 46373 | 92.54425 |
| 53 | I | 1898  | 3.78774  |
| 53 | L | 1143  | 2.28103  |
| 53 | A | 222   | 0.44303  |
| 53 | M | 165   | 0.32928  |
| 53 | T | 96    | 0.19158  |
| 53 | G | 46    | 0.0918   |
| 53 | D | 45    | 0.0898   |
| 53 | E | 39    | 0.07783  |
| 53 | F | 32    | 0.06386  |
| 53 | C | 13    | 0.02594  |

|    |   |       |          |
|----|---|-------|----------|
| 53 | S | 12    | 0.02395  |
| 53 | R | 9     | 0.01796  |
| 53 | P | 8     | 0.01597  |
| 53 | Y | 3     | 0.00599  |
| 53 | H | 2     | 0.00399  |
| 53 | N | 2     | 0.00399  |
| 53 | Q | 1     | 0.002    |
| 54 | S | 40220 | 80.07964 |
| 54 | A | 7571  | 15.07417 |
| 54 | C | 787   | 1.56695  |
| 54 | T | 714   | 1.4216   |
| 54 | G | 498   | 0.99154  |
| 54 | P | 139   | 0.27675  |
| 54 | V | 79    | 0.15729  |
| 54 | L | 74    | 0.14734  |
| 54 | I | 48    | 0.09557  |
| 54 | F | 38    | 0.07566  |
| 54 | Y | 18    | 0.03584  |
| 54 | Q | 13    | 0.02588  |
| 54 | W | 9     | 0.01792  |
| 54 | M | 6     | 0.01195  |
| 54 | R | 6     | 0.01195  |
| 54 | D | 2     | 0.00398  |
| 54 | E | 2     | 0.00398  |
| 54 | N | 1     | 0.00199  |
| 55 | S | 15675 | 31.13764 |
| 55 | T | 8675  | 17.23247 |
| 55 | G | 8147  | 16.18363 |
| 55 | A | 4627  | 9.19132  |
| 55 | D | 2460  | 4.88667  |
| 55 | R | 2086  | 4.14374  |
| 55 | V | 1746  | 3.46835  |
| 55 | L | 1715  | 3.40677  |
| 55 | H | 864   | 1.71629  |
| 55 | N | 812   | 1.613    |
| 55 | Q | 717   | 1.42429  |
| 55 | I | 687   | 1.36469  |
| 55 | Y | 652   | 1.29517  |
| 55 | F | 476   | 0.94555  |
| 55 | K | 286   | 0.56813  |
| 55 | C | 258   | 0.5125   |
| 55 | M | 193   | 0.38339  |
| 55 | E | 187   | 0.37147  |
| 55 | W | 61    | 0.12117  |
| 55 | P | 17    | 0.03377  |
| 56 | I | 41460 | 82.25538 |

|    |   |       |          |
|----|---|-------|----------|
| 56 | V | 4833  | 9.58852  |
| 56 | L | 1134  | 2.24982  |
| 56 | M | 760   | 1.50782  |
| 56 | T | 608   | 1.20625  |
| 56 | F | 524   | 1.0396   |
| 56 | S | 271   | 0.53766  |
| 56 | A | 222   | 0.44044  |
| 56 | R | 153   | 0.30355  |
| 56 | C | 134   | 0.26585  |
| 56 | N | 88    | 0.17459  |
| 56 | G | 63    | 0.12499  |
| 56 | D | 53    | 0.10515  |
| 56 | H | 27    | 0.05357  |
| 56 | Y | 25    | 0.0496   |
| 56 | Q | 14    | 0.02778  |
| 56 | K | 13    | 0.02579  |
| 56 | P | 12    | 0.02381  |
| 56 | W | 8     | 0.01587  |
| 56 | E | 2     | 0.00397  |
| 57 | N | 14664 | 29.05949 |
| 57 | Y | 8570  | 16.98308 |
| 57 | S | 7760  | 15.37791 |
| 57 | D | 4166  | 8.25572  |
| 57 | A | 3746  | 7.42341  |
| 57 | T | 2643  | 5.2376   |
| 57 | G | 1149  | 2.27696  |
| 57 | H | 1134  | 2.24724  |
| 57 | L | 982   | 1.94602  |
| 57 | R | 978   | 1.93809  |
| 57 | K | 911   | 1.80532  |
| 57 | V | 816   | 1.61706  |
| 57 | F | 572   | 1.13353  |
| 57 | I | 497   | 0.9849   |
| 57 | W | 496   | 0.98292  |
| 57 | E | 413   | 0.81844  |
| 57 | Q | 338   | 0.66981  |
| 57 | P | 260   | 0.51524  |
| 57 | M | 206   | 0.40823  |
| 57 | C | 161   | 0.31905  |
| 58 | S | 23070 | 45.63618 |
| 58 | T | 5302  | 10.48821 |
| 58 | G | 4105  | 8.12035  |
| 58 | N | 2959  | 5.85338  |
| 58 | R | 2249  | 4.44888  |
| 58 | P | 2075  | 4.10468  |
| 58 | A | 2027  | 4.00973  |

|    |   |       |          |
|----|---|-------|----------|
| 58 | D | 1417  | 2.80305  |
| 58 | Y | 1371  | 2.71206  |
| 58 | I | 1122  | 2.2195   |
| 58 | K | 908   | 1.79617  |
| 58 | E | 893   | 1.7665   |
| 58 | W | 844   | 1.66957  |
| 58 | V | 482   | 0.95347  |
| 58 | H | 418   | 0.82687  |
| 58 | L | 383   | 0.75764  |
| 58 | F | 343   | 0.67851  |
| 58 | M | 279   | 0.55191  |
| 58 | Q | 227   | 0.44904  |
| 58 | C | 78    | 0.1543   |
| 59 | D | 17658 | 34.85934 |
| 59 | G | 15278 | 30.16089 |
| 59 | S | 6103  | 12.04817 |
| 59 | N | 3217  | 6.3508   |
| 59 | A | 2278  | 4.49709  |
| 59 | R | 1613  | 3.18429  |
| 59 | T | 1057  | 2.08666  |
| 59 | V | 676   | 1.33452  |
| 59 | E | 603   | 1.19041  |
| 59 | Y | 546   | 1.07788  |
| 59 | L | 420   | 0.82914  |
| 59 | I | 361   | 0.71266  |
| 59 | H | 258   | 0.50933  |
| 59 | F | 150   | 0.29612  |
| 59 | P | 145   | 0.28625  |
| 59 | Q | 133   | 0.26256  |
| 59 | K | 87    | 0.17175  |
| 59 | C | 28    | 0.05528  |
| 59 | W | 23    | 0.04541  |
| 59 | M | 21    | 0.04146  |
| 60 | G | 41371 | 81.53688 |
| 60 | S | 2938  | 5.79042  |
| 60 | D | 2123  | 4.18416  |
| 60 | A | 1312  | 2.58578  |
| 60 | T | 568   | 1.11945  |
| 60 | N | 566   | 1.11551  |
| 60 | R | 391   | 0.77061  |
| 60 | F | 269   | 0.53016  |
| 60 | E | 260   | 0.51243  |
| 60 | V | 226   | 0.44542  |
| 60 | I | 147   | 0.28972  |
| 60 | H | 124   | 0.24439  |
| 60 | P | 116   | 0.22862  |

|    |   |       |          |
|----|---|-------|----------|
| 60 | L | 100   | 0.19709  |
| 60 | K | 93    | 0.18329  |
| 60 | Y | 71    | 0.13993  |
| 60 | Q | 25    | 0.04927  |
| 60 | C | 21    | 0.04139  |
| 60 | M | 15    | 0.02956  |
| 60 | W | 3     | 0.00591  |
| 61 | G | 15288 | 30.08146 |
| 61 | S | 12320 | 24.24147 |
| 61 | T | 5106  | 10.04683 |
| 61 | R | 4407  | 8.67144  |
| 61 | D | 4389  | 8.63602  |
| 61 | A | 1880  | 3.69919  |
| 61 | V | 1296  | 2.55008  |
| 61 | N | 1043  | 2.05226  |
| 61 | I | 983   | 1.9342   |
| 61 | E | 963   | 1.89485  |
| 61 | K | 865   | 1.70202  |
| 61 | W | 635   | 1.24946  |
| 61 | Y | 429   | 0.84412  |
| 61 | H | 224   | 0.44075  |
| 61 | L | 221   | 0.43485  |
| 61 | M | 219   | 0.43092  |
| 61 | Q | 210   | 0.41321  |
| 61 | F | 159   | 0.31286  |
| 61 | P | 140   | 0.27547  |
| 61 | C | 45    | 0.08854  |
| 62 | T | 13689 | 26.90818 |
| 62 | S | 10927 | 21.47898 |
| 62 | N | 6503  | 12.78281 |
| 62 | R | 3285  | 6.45726  |
| 62 | I | 2328  | 4.5761   |
| 62 | K | 2292  | 4.50534  |
| 62 | V | 1916  | 3.76624  |
| 62 | G | 1722  | 3.3849   |
| 62 | A | 1657  | 3.25713  |
| 62 | D | 1621  | 3.18637  |
| 62 | Y | 1478  | 2.90527  |
| 62 | P | 631   | 1.24034  |
| 62 | E | 574   | 1.1283   |
| 62 | L | 539   | 1.0595   |
| 62 | H | 538   | 1.05754  |
| 62 | Q | 479   | 0.94156  |
| 62 | M | 362   | 0.71158  |
| 62 | F | 214   | 0.42066  |
| 62 | W | 91    | 0.17888  |

|    |    |       |          |
|----|----|-------|----------|
| 62 | C  | 27    | 0.05307  |
| 63 | T  | 35436 | 77.3847  |
| 63 | A  | 2039  | 4.45274  |
| 63 | S  | 1770  | 3.8653   |
| 63 | I  | 1686  | 3.68187  |
| 63 | P  | 1592  | 3.47659  |
| 63 | R  | 726   | 1.58543  |
| 63 | K  | 594   | 1.29717  |
| 63 | V  | 587   | 1.28188  |
| 63 | L  | 475   | 1.0373   |
| 63 | Q  | 339   | 0.7403   |
| 63 | G  | 141   | 0.30791  |
| 63 | E  | 116   | 0.25332  |
| 63 | N  | 95    | 0.20746  |
| 63 | M  | 88    | 0.19217  |
| 63 | D  | 70    | 0.15287  |
| 63 | F  | 25    | 0.05459  |
| 63 | Y  | 6     | 0.0131   |
| 63 | H  | 4     | 0.00874  |
| 63 | C  | 2     | 0.00437  |
| 63 | W  | 1     | 0.00218  |
| 63 | NA | 0     | 0        |
| 64 | NA | 0     | 0        |
| 65 | NA | 0     | 0        |
| 66 | Y  | 26142 | 51.20762 |
| 66 | N  | 3728  | 7.3025   |
| 66 | L  | 2455  | 4.80892  |
| 66 | E  | 2332  | 4.56798  |
| 66 | D  | 2251  | 4.40932  |
| 66 | F  | 1934  | 3.78837  |
| 66 | H  | 1894  | 3.71002  |
| 66 | R  | 1877  | 3.67672  |
| 66 | S  | 1866  | 3.65517  |
| 66 | A  | 1460  | 2.85989  |
| 66 | T  | 1285  | 2.51709  |
| 66 | V  | 1105  | 2.1645   |
| 66 | W  | 946   | 1.85305  |
| 66 | G  | 659   | 1.29087  |
| 66 | I  | 273   | 0.53476  |
| 66 | Q  | 273   | 0.53476  |
| 66 | K  | 207   | 0.40548  |
| 66 | C  | 145   | 0.28403  |
| 66 | M  | 123   | 0.24094  |
| 66 | P  | 96    | 0.18805  |
| 67 | Y  | 47375 | 92.38314 |
| 67 | S  | 1025  | 1.99879  |

|    |   |       |          |
|----|---|-------|----------|
| 67 | F | 446   | 0.86972  |
| 67 | C | 440   | 0.85802  |
| 67 | V | 407   | 0.79367  |
| 67 | L | 321   | 0.62596  |
| 67 | H | 277   | 0.54016  |
| 67 | A | 199   | 0.38806  |
| 67 | D | 199   | 0.38806  |
| 67 | N | 190   | 0.37051  |
| 67 | I | 154   | 0.30031  |
| 67 | T | 103   | 0.20085  |
| 67 | Q | 45    | 0.08775  |
| 67 | W | 36    | 0.0702   |
| 67 | E | 25    | 0.04875  |
| 67 | G | 17    | 0.03315  |
| 67 | R | 10    | 0.0195   |
| 67 | M | 6     | 0.0117   |
| 67 | P | 4     | 0.0078   |
| 67 | K | 2     | 0.0039   |
| 68 | A | 36141 | 70.06242 |
| 68 | S | 3536  | 6.85484  |
| 68 | T | 2520  | 4.88524  |
| 68 | V | 1786  | 3.46231  |
| 68 | P | 1694  | 3.28396  |
| 68 | L | 1354  | 2.62484  |
| 68 | G | 1333  | 2.58413  |
| 68 | R | 927   | 1.79707  |
| 68 | H | 490   | 0.94991  |
| 68 | E | 434   | 0.84135  |
| 68 | N | 389   | 0.75411  |
| 68 | D | 332   | 0.64361  |
| 68 | Q | 232   | 0.44975  |
| 68 | K | 191   | 0.37027  |
| 68 | I | 151   | 0.29273  |
| 68 | C | 40    | 0.07754  |
| 68 | M | 24    | 0.04653  |
| 68 | Y | 8     | 0.01551  |
| 68 | F | 1     | 0.00194  |
| 68 | W | 1     | 0.00194  |
| 69 | D | 44433 | 85.74985 |
| 69 | E | 2260  | 4.3615   |
| 69 | N | 1159  | 2.23672  |
| 69 | A | 939   | 1.81215  |
| 69 | G | 672   | 1.29687  |
| 69 | S | 441   | 0.85107  |
| 69 | P | 400   | 0.77195  |
| 69 | T | 316   | 0.60984  |



|    |   |       |          |
|----|---|-------|----------|
| 69 | Y | 230   | 0.44387  |
| 69 | H | 200   | 0.38597  |
| 69 | V | 182   | 0.35124  |
| 69 | K | 155   | 0.29913  |
| 69 | R | 133   | 0.25667  |
| 69 | W | 104   | 0.20071  |
| 69 | L | 94    | 0.18141  |
| 69 | Q | 71    | 0.13702  |
| 69 | I | 18    | 0.03474  |
| 69 | M | 9     | 0.01737  |
| 69 | F | 1     | 0.00193  |
| 70 | S | 48273 | 92.10471 |
| 70 | F | 1062  | 2.02629  |
| 70 | A | 996   | 1.90036  |
| 70 | P | 803   | 1.53212  |
| 70 | T | 365   | 0.69642  |
| 70 | L | 139   | 0.26521  |
| 70 | N | 137   | 0.2614   |
| 70 | R | 113   | 0.2156   |
| 70 | V | 97    | 0.18508  |
| 70 | D | 66    | 0.12593  |
| 70 | Y | 64    | 0.12211  |
| 70 | I | 63    | 0.1202   |
| 70 | G | 57    | 0.10876  |
| 70 | Q | 55    | 0.10494  |
| 70 | H | 43    | 0.08204  |
| 70 | M | 32    | 0.06106  |
| 70 | C | 25    | 0.0477   |
| 70 | K | 10    | 0.01908  |
| 70 | W | 6     | 0.01145  |
| 70 | E | 5     | 0.00954  |
| 71 | V | 45706 | 86.59884 |
| 71 | I | 2085  | 3.95043  |
| 71 | A | 1949  | 3.69276  |
| 71 | M | 1284  | 2.43279  |
| 71 | L | 1280  | 2.42521  |
| 71 | G | 143   | 0.27094  |
| 71 | E | 102   | 0.19326  |
| 71 | T | 96    | 0.18189  |
| 71 | F | 49    | 0.09284  |
| 71 | S | 26    | 0.04926  |
| 71 | K | 11    | 0.02084  |
| 71 | P | 10    | 0.01895  |
| 71 | Q | 10    | 0.01895  |
| 71 | R | 10    | 0.01895  |
| 71 | N | 6     | 0.01137  |

|    |    |       |          |
|----|----|-------|----------|
| 71 | D  | 5     | 0.00947  |
| 71 | W  | 4     | 0.00758  |
| 71 | H  | 2     | 0.00379  |
| 71 | C  | 1     | 0.00189  |
| 72 | K  | 45749 | 86.48368 |
| 72 | V  | 1999  | 3.7789   |
| 72 | R  | 1669  | 3.15507  |
| 72 | E  | 998   | 1.88661  |
| 72 | Q  | 907   | 1.71459  |
| 72 | N  | 384   | 0.72591  |
| 72 | T  | 291   | 0.5501   |
| 72 | M  | 284   | 0.53687  |
| 72 | A  | 192   | 0.36296  |
| 72 | L  | 139   | 0.26276  |
| 72 | S  | 124   | 0.23441  |
| 72 | W  | 66    | 0.12477  |
| 72 | I  | 27    | 0.05104  |
| 72 | D  | 25    | 0.04726  |
| 72 | G  | 23    | 0.04348  |
| 72 | Y  | 11    | 0.02079  |
| 72 | H  | 5     | 0.00945  |
| 72 | P  | 4     | 0.00756  |
| 72 | C  | 1     | 0.00189  |
| 72 | F  | 1     | 0.00189  |
| 73 | NA | 0     | 0        |
| 74 | G  | 51170 | 96.06503 |
| 74 | D  | 1514  | 2.84234  |
| 74 | A  | 227   | 0.42616  |
| 74 | S  | 131   | 0.24594  |
| 74 | E  | 79    | 0.14831  |
| 74 | V  | 46    | 0.08636  |
| 74 | N  | 26    | 0.04881  |
| 74 | C  | 21    | 0.03942  |
| 74 | R  | 17    | 0.03192  |
| 74 | T  | 12    | 0.02253  |
| 74 | F  | 8     | 0.01502  |
| 74 | H  | 6     | 0.01126  |
| 74 | L  | 3     | 0.00563  |
| 74 | W  | 3     | 0.00563  |
| 74 | Y  | 2     | 0.00375  |
| 74 | P  | 1     | 0.00188  |
| 75 | R  | 52841 | 98.95504 |
| 75 | Q  | 448   | 0.83897  |
| 75 | L  | 43    | 0.08053  |
| 75 | G  | 31    | 0.05805  |
| 75 | S  | 9     | 0.01685  |

|    |   |       |          |
|----|---|-------|----------|
| 75 | P | 8     | 0.01498  |
| 75 | C | 7     | 0.01311  |
| 75 | H | 5     | 0.00936  |
| 75 | W | 3     | 0.00562  |
| 75 | K | 2     | 0.00375  |
| 75 | N | 1     | 0.00187  |
| 75 | V | 1     | 0.00187  |
| 76 | F | 50904 | 95.26697 |
| 76 | L | 886   | 1.65815  |
| 76 | S | 605   | 1.13226  |
| 76 | V | 289   | 0.54086  |
| 76 | A | 163   | 0.30505  |
| 76 | Y | 150   | 0.28073  |
| 76 | I | 141   | 0.26388  |
| 76 | C | 136   | 0.25452  |
| 76 | T | 121   | 0.22645  |
| 76 | G | 15    | 0.02807  |
| 76 | M | 6     | 0.01123  |
| 76 | W | 6     | 0.01123  |
| 76 | P | 4     | 0.00749  |
| 76 | H | 3     | 0.00561  |
| 76 | N | 2     | 0.00374  |
| 76 | D | 1     | 0.00187  |
| 76 | E | 1     | 0.00187  |
| 77 | T | 47704 | 89.19136 |
| 77 | I | 2029  | 3.79359  |
| 77 | A | 2010  | 3.75806  |
| 77 | S | 904   | 1.69019  |
| 77 | V | 359   | 0.67122  |
| 77 | F | 218   | 0.40759  |
| 77 | N | 50    | 0.09348  |
| 77 | L | 48    | 0.08974  |
| 77 | P | 37    | 0.06918  |
| 77 | D | 32    | 0.05983  |
| 77 | R | 27    | 0.05048  |
| 77 | Y | 26    | 0.04861  |
| 77 | G | 13    | 0.02431  |
| 77 | H | 12    | 0.02244  |
| 77 | K | 11    | 0.02057  |
| 77 | C | 2     | 0.00374  |
| 77 | M | 2     | 0.00374  |
| 77 | E | 1     | 0.00187  |
| 78 | I | 44969 | 84.04478 |
| 78 | V | 3329  | 6.22173  |
| 78 | A | 1161  | 2.16985  |
| 78 | M | 1093  | 2.04276  |

|    |   |       |          |
|----|---|-------|----------|
| 78 | S | 840   | 1.56992  |
| 78 | T | 800   | 1.49516  |
| 78 | L | 497   | 0.92887  |
| 78 | F | 235   | 0.4392   |
| 78 | C | 214   | 0.39996  |
| 78 | G | 202   | 0.37753  |
| 78 | N | 110   | 0.20558  |
| 78 | H | 18    | 0.03364  |
| 78 | D | 11    | 0.02056  |
| 78 | K | 11    | 0.02056  |
| 78 | P | 8     | 0.01495  |
| 78 | W | 4     | 0.00748  |
| 78 | E | 2     | 0.00374  |
| 78 | R | 1     | 0.00187  |
| 78 | Y | 1     | 0.00187  |
| 79 | S | 51339 | 95.92847 |
| 79 | T | 691   | 1.29115  |
| 79 | A | 607   | 1.1342   |
| 79 | F | 291   | 0.54374  |
| 79 | P | 238   | 0.44471  |
| 79 | Y | 85    | 0.15883  |
| 79 | V | 45    | 0.08408  |
| 79 | N | 43    | 0.08035  |
| 79 | W | 33    | 0.06166  |
| 79 | D | 29    | 0.05419  |
| 79 | G | 25    | 0.04671  |
| 79 | L | 25    | 0.04671  |
| 79 | R | 22    | 0.04111  |
| 79 | H | 15    | 0.02803  |
| 79 | I | 14    | 0.02616  |
| 79 | C | 10    | 0.01869  |
| 79 | E | 3     | 0.00561  |
| 79 | Q | 2     | 0.00374  |
| 79 | M | 1     | 0.00187  |
| 80 | R | 45497 | 85.00458 |
| 80 | K | 2781  | 5.1959   |
| 80 | Q | 2375  | 4.43734  |
| 80 | S | 842   | 1.57316  |
| 80 | G | 385   | 0.71932  |
| 80 | A | 271   | 0.50632  |
| 80 | T | 238   | 0.44467  |
| 80 | H | 235   | 0.43906  |
| 80 | L | 229   | 0.42785  |
| 80 | E | 165   | 0.30828  |
| 80 | V | 150   | 0.28025  |
| 80 | I | 138   | 0.25783  |

|    |   |       |          |
|----|---|-------|----------|
| 80 | P | 59    | 0.11023  |
| 80 | M | 58    | 0.10836  |
| 80 | N | 42    | 0.07847  |
| 80 | F | 29    | 0.05418  |
| 80 | Y | 18    | 0.03363  |
| 80 | W | 8     | 0.01495  |
| 80 | D | 2     | 0.00374  |
| 80 | C | 1     | 0.00187  |
| 81 | D | 51540 | 96.28965 |
| 81 | G | 456   | 0.85192  |
| 81 | N | 449   | 0.83884  |
| 81 | E | 321   | 0.59971  |
| 81 | A | 226   | 0.42222  |
| 81 | V | 171   | 0.31947  |
| 81 | S | 139   | 0.25969  |
| 81 | H | 111   | 0.20738  |
| 81 | I | 57    | 0.10649  |
| 81 | Y | 21    | 0.03923  |
| 81 | T | 20    | 0.03737  |
| 81 | Q | 7     | 0.01308  |
| 81 | L | 3     | 0.0056   |
| 81 | F | 2     | 0.00374  |
| 81 | P | 2     | 0.00374  |
| 81 | R | 1     | 0.00187  |
| 82 | N | 46438 | 86.74325 |
| 82 | D | 2569  | 4.79873  |
| 82 | S | 1712  | 3.19791  |
| 82 | K | 640   | 1.19548  |
| 82 | T | 389   | 0.72663  |
| 82 | I | 341   | 0.63697  |
| 82 | Y | 306   | 0.57159  |
| 82 | V | 279   | 0.52115  |
| 82 | G | 230   | 0.42963  |
| 82 | H | 163   | 0.30447  |
| 82 | R | 125   | 0.23349  |
| 82 | A | 112   | 0.20921  |
| 82 | E | 59    | 0.11021  |
| 82 | P | 53    | 0.099    |
| 82 | F | 49    | 0.09153  |
| 82 | L | 37    | 0.06911  |
| 82 | Q | 21    | 0.03923  |
| 82 | M | 9     | 0.01681  |
| 82 | C | 2     | 0.00374  |
| 82 | W | 1     | 0.00187  |
| 83 | A | 45537 | 85.05706 |
| 83 | T | 2132  | 3.98229  |

|    |   |       |          |
|----|---|-------|----------|
| 83 | S | 1529  | 2.85597  |
| 83 | V | 1168  | 2.18167  |
| 83 | D | 1142  | 2.1331   |
| 83 | G | 878   | 1.63999  |
| 83 | R | 323   | 0.60332  |
| 83 | P | 242   | 0.45202  |
| 83 | N | 208   | 0.38852  |
| 83 | I | 80    | 0.14943  |
| 83 | F | 77    | 0.14383  |
| 83 | E | 71    | 0.13262  |
| 83 | L | 65    | 0.12141  |
| 83 | Y | 60    | 0.11207  |
| 83 | H | 11    | 0.02055  |
| 83 | K | 8     | 0.01494  |
| 83 | M | 4     | 0.00747  |
| 83 | C | 1     | 0.00187  |
| 83 | W | 1     | 0.00187  |
| 84 | K | 44533 | 83.17085 |
| 84 | R | 2354  | 4.39638  |
| 84 | E | 2257  | 4.21522  |
| 84 | Q | 1455  | 2.71739  |
| 84 | N | 1129  | 2.10855  |
| 84 | T | 476   | 0.88899  |
| 84 | A | 287   | 0.53601  |
| 84 | M | 276   | 0.51546  |
| 84 | D | 220   | 0.41088  |
| 84 | G | 195   | 0.36419  |
| 84 | S | 120   | 0.22411  |
| 84 | L | 105   | 0.1961   |
| 84 | V | 66    | 0.12326  |
| 84 | P | 29    | 0.05416  |
| 84 | I | 23    | 0.04296  |
| 84 | H | 9     | 0.01681  |
| 84 | W | 6     | 0.01121  |
| 84 | Y | 3     | 0.0056   |
| 84 | F | 1     | 0.00187  |
| 85 | N | 45754 | 85.45122 |
| 85 | S | 2416  | 4.51218  |
| 85 | D | 1506  | 2.81264  |
| 85 | K | 1204  | 2.24862  |
| 85 | T | 645   | 1.20462  |
| 85 | R | 513   | 0.95809  |
| 85 | A | 368   | 0.68729  |
| 85 | G | 225   | 0.42022  |
| 85 | H | 206   | 0.38473  |
| 85 | E | 154   | 0.28761  |

|    |   |       |          |
|----|---|-------|----------|
| 85 | I | 130   | 0.24279  |
| 85 | Y | 113   | 0.21104  |
| 85 | Q | 91    | 0.16995  |
| 85 | V | 83    | 0.15501  |
| 85 | M | 51    | 0.09525  |
| 85 | L | 41    | 0.07657  |
| 85 | P | 38    | 0.07097  |
| 85 | F | 4     | 0.00747  |
| 85 | C | 2     | 0.00374  |
| 86 | T | 44348 | 82.81915 |
| 86 | M | 4868  | 9.09091  |
| 86 | A | 1112  | 2.07664  |
| 86 | I | 1000  | 1.86748  |
| 86 | S | 922   | 1.72182  |
| 86 | V | 396   | 0.73952  |
| 86 | L | 306   | 0.57145  |
| 86 | R | 212   | 0.39591  |
| 86 | K | 115   | 0.21476  |
| 86 | E | 90    | 0.16807  |
| 86 | W | 54    | 0.10084  |
| 86 | Q | 40    | 0.0747   |
| 86 | P | 39    | 0.07283  |
| 86 | N | 21    | 0.03922  |
| 86 | G | 11    | 0.02054  |
| 86 | F | 9     | 0.01681  |
| 86 | D | 2     | 0.00373  |
| 86 | H | 2     | 0.00373  |
| 86 | Y | 1     | 0.00187  |
| 87 | V | 26682 | 49.82633 |
| 87 | L | 22096 | 41.26237 |
| 87 | M | 1596  | 2.98039  |
| 87 | I | 1113  | 2.07843  |
| 87 | A | 1027  | 1.91783  |
| 87 | G | 173   | 0.32306  |
| 87 | F | 159   | 0.29692  |
| 87 | T | 151   | 0.28198  |
| 87 | H | 129   | 0.2409   |
| 87 | Y | 121   | 0.22596  |
| 87 | P | 87    | 0.16246  |
| 87 | Q | 52    | 0.09711  |
| 87 | W | 52    | 0.09711  |
| 87 | E | 43    | 0.0803   |
| 87 | S | 38    | 0.07096  |
| 87 | C | 12    | 0.02241  |
| 87 | R | 8     | 0.01494  |
| 87 | K | 7     | 0.01307  |

|    |   |       |          |
|----|---|-------|----------|
| 87 | N | 3     | 0.0056   |
| 87 | D | 1     | 0.00187  |
| 88 | Y | 44091 | 82.33306 |
| 88 | F | 1975  | 3.688    |
| 88 | S | 1955  | 3.65066  |
| 88 | N | 1318  | 2.46116  |
| 88 | T | 855   | 1.59658  |
| 88 | H | 822   | 1.53496  |
| 88 | D | 776   | 1.44906  |
| 88 | W | 446   | 0.83284  |
| 88 | I | 390   | 0.72826  |
| 88 | A | 365   | 0.68158  |
| 88 | L | 147   | 0.2745   |
| 88 | C | 124   | 0.23155  |
| 88 | V | 108   | 0.20167  |
| 88 | R | 75    | 0.14005  |
| 88 | K | 43    | 0.0803   |
| 88 | E | 33    | 0.06162  |
| 88 | Q | 10    | 0.01867  |
| 88 | M | 9     | 0.01681  |
| 88 | P | 7     | 0.01307  |
| 88 | G | 3     | 0.0056   |
| 89 | L | 52958 | 98.8908  |
| 89 | P | 215   | 0.40148  |
| 89 | Q | 134   | 0.25022  |
| 89 | F | 70    | 0.13071  |
| 89 | V | 45    | 0.08403  |
| 89 | M | 42    | 0.07843  |
| 89 | I | 36    | 0.06722  |
| 89 | S | 24    | 0.04482  |
| 89 | R | 13    | 0.02428  |
| 89 | H | 11    | 0.02054  |
| 89 | A | 2     | 0.00373  |
| 89 | T | 1     | 0.00187  |
| 89 | Y | 1     | 0.00187  |
| 90 | Q | 45808 | 85.53929 |
| 90 | E | 2789  | 5.20802  |
| 90 | H | 2757  | 5.14827  |
| 90 | R | 1034  | 1.93083  |
| 90 | L | 326   | 0.60875  |
| 90 | M | 236   | 0.44069  |
| 90 | D | 208   | 0.38841  |
| 90 | K | 62    | 0.11578  |
| 90 | V | 60    | 0.11204  |
| 90 | T | 56    | 0.10457  |
| 90 | S | 50    | 0.09337  |



|    |   |       |          |
|----|---|-------|----------|
| 90 | Y | 45    | 0.08403  |
| 90 | I | 42    | 0.07843  |
| 90 | G | 31    | 0.05789  |
| 90 | A | 20    | 0.03735  |
| 90 | P | 11    | 0.02054  |
| 90 | N | 7     | 0.01307  |
| 90 | F | 6     | 0.0112   |
| 90 | W | 4     | 0.00747  |
| 91 | M | 38540 | 71.96743 |
| 91 | L | 12717 | 23.74701 |
| 91 | I | 1138  | 2.12504  |
| 91 | V | 434   | 0.81043  |
| 91 | T | 291   | 0.5434   |
| 91 | A | 207   | 0.38654  |
| 91 | S | 74    | 0.13818  |
| 91 | F | 67    | 0.12511  |
| 91 | K | 51    | 0.09523  |
| 91 | C | 13    | 0.02428  |
| 91 | R | 7     | 0.01307  |
| 91 | Q | 5     | 0.00934  |
| 91 | P | 3     | 0.0056   |
| 91 | W | 3     | 0.0056   |
| 91 | E | 1     | 0.00187  |
| 91 | G | 1     | 0.00187  |
| 92 | N | 41911 | 78.26225 |
| 92 | D | 4062  | 7.58515  |
| 92 | T | 3035  | 5.66739  |
| 92 | S | 2126  | 3.96997  |
| 92 | H | 445   | 0.83097  |
| 92 | I | 413   | 0.77121  |
| 92 | Y | 298   | 0.55647  |
| 92 | R | 277   | 0.51725  |
| 92 | A | 217   | 0.40521  |
| 92 | K | 177   | 0.33052  |
| 92 | G | 164   | 0.30624  |
| 92 | V | 105   | 0.19607  |
| 92 | M | 89    | 0.16619  |
| 92 | E | 82    | 0.15312  |
| 92 | L | 62    | 0.11578  |
| 92 | F | 60    | 0.11204  |
| 92 | Q | 15    | 0.02801  |
| 92 | C | 8     | 0.01494  |
| 92 | P | 3     | 0.0056   |
| 92 | W | 3     | 0.0056   |
| 93 | S | 42262 | 78.91769 |
| 93 | N | 5678  | 10.60278 |

|    |   |       |          |
|----|---|-------|----------|
| 93 | G | 1584  | 2.95787  |
| 93 | D | 1274  | 2.379    |
| 93 | T | 919   | 1.71609  |
| 93 | R | 737   | 1.37623  |
| 93 | A | 333   | 0.62183  |
| 93 | K | 168   | 0.31371  |
| 93 | I | 118   | 0.22035  |
| 93 | M | 94    | 0.17553  |
| 93 | Y | 69    | 0.12885  |
| 93 | C | 60    | 0.11204  |
| 93 | H | 60    | 0.11204  |
| 93 | V | 51    | 0.09523  |
| 93 | E | 41    | 0.07656  |
| 93 | Q | 34    | 0.06349  |
| 93 | F | 28    | 0.05229  |
| 93 | L | 22    | 0.04108  |
| 93 | P | 13    | 0.02428  |
| 93 | W | 7     | 0.01307  |
| 94 | L | 52477 | 97.99261 |
| 94 | V | 400   | 0.74694  |
| 94 | P | 352   | 0.65731  |
| 94 | M | 121   | 0.22595  |
| 94 | Q | 93    | 0.17366  |
| 94 | A | 46    | 0.0859   |
| 94 | S | 20    | 0.03735  |
| 94 | R | 17    | 0.03174  |
| 94 | I | 14    | 0.02614  |
| 94 | F | 5     | 0.00934  |
| 94 | T | 4     | 0.00747  |
| 94 | C | 2     | 0.00373  |
| 94 | H | 1     | 0.00187  |
| 95 | K | 41035 | 76.62646 |
| 95 | T | 2899  | 5.41343  |
| 95 | Q | 2656  | 4.95967  |
| 95 | R | 2105  | 3.93076  |
| 95 | E | 1864  | 3.48073  |
| 95 | N | 1652  | 3.08485  |
| 95 | I | 334   | 0.62369  |
| 95 | S | 319   | 0.59568  |
| 95 | A | 210   | 0.39214  |
| 95 | L | 116   | 0.21661  |
| 95 | V | 99    | 0.18487  |
| 95 | M | 91    | 0.16993  |
| 95 | G | 70    | 0.13071  |
| 95 | D | 54    | 0.10084  |
| 95 | H | 28    | 0.05229  |

|    |   |       |          |
|----|---|-------|----------|
| 95 | Y | 13    | 0.02428  |
| 95 | W | 3     | 0.0056   |
| 95 | F | 2     | 0.00373  |
| 95 | C | 1     | 0.00187  |
| 95 | P | 1     | 0.00187  |
| 96 | P | 21755 | 40.62407 |
| 96 | S | 12685 | 23.68726 |
| 96 | T | 11954 | 22.32223 |
| 96 | I | 1757  | 3.28092  |
| 96 | R | 1496  | 2.79355  |
| 96 | A | 1389  | 2.59374  |
| 96 | F | 946   | 1.76651  |
| 96 | L | 536   | 1.0009   |
| 96 | V | 463   | 0.86458  |
| 96 | D | 144   | 0.2689   |
| 96 | H | 136   | 0.25396  |
| 96 | Y | 93    | 0.17366  |
| 96 | N | 72    | 0.13445  |
| 96 | E | 51    | 0.09523  |
| 96 | G | 29    | 0.05415  |
| 96 | M | 25    | 0.04668  |
| 96 | W | 8     | 0.01494  |
| 96 | Q | 7     | 0.01307  |
| 96 | C | 4     | 0.00747  |
| 96 | K | 2     | 0.00373  |
| 97 | E | 47466 | 88.63535 |
| 97 | D | 4249  | 7.93434  |
| 97 | G | 854   | 1.59471  |
| 97 | A | 266   | 0.49671  |
| 97 | V | 133   | 0.24836  |
| 97 | T | 127   | 0.23715  |
| 97 | Q | 125   | 0.23342  |
| 97 | K | 114   | 0.21288  |
| 97 | S | 95    | 0.1774   |
| 97 | R | 41    | 0.07656  |
| 97 | N | 39    | 0.07283  |
| 97 | M | 19    | 0.03548  |
| 97 | H | 12    | 0.02241  |
| 97 | L | 7     | 0.01307  |
| 97 | P | 3     | 0.0056   |
| 97 | I | 1     | 0.00187  |
| 97 | Y | 1     | 0.00187  |
| 98 | D | 52992 | 98.95429 |
| 98 | G | 200   | 0.37347  |
| 98 | E | 179   | 0.33425  |
| 98 | N | 71    | 0.13258  |

|     |   |       |          |
|-----|---|-------|----------|
| 98  | V | 65    | 0.12138  |
| 98  | H | 26    | 0.04855  |
| 98  | Y | 10    | 0.01867  |
| 98  | A | 8     | 0.01494  |
| 98  | C | 1     | 0.00187  |
| 99  | T | 48496 | 90.5604  |
| 99  | S | 3007  | 5.61521  |
| 99  | A | 1131  | 2.11201  |
| 99  | M | 648   | 1.21006  |
| 99  | N | 63    | 0.11764  |
| 99  | G | 46    | 0.0859   |
| 99  | K | 24    | 0.04482  |
| 99  | L | 23    | 0.04295  |
| 99  | I | 22    | 0.04108  |
| 99  | P | 22    | 0.04108  |
| 99  | R | 21    | 0.03921  |
| 99  | E | 18    | 0.03361  |
| 99  | D | 13    | 0.02428  |
| 99  | V | 13    | 0.02428  |
| 99  | Q | 3     | 0.0056   |
| 99  | Y | 1     | 0.00187  |
| 100 | A | 46676 | 87.16177 |
| 100 | G | 6226  | 11.6263  |
| 100 | S | 272   | 0.50793  |
| 100 | T | 91    | 0.16993  |
| 100 | V | 89    | 0.1662   |
| 100 | D | 83    | 0.15499  |
| 100 | F | 35    | 0.06536  |
| 100 | R | 30    | 0.05602  |
| 100 | Y | 23    | 0.04295  |
| 100 | P | 15    | 0.02801  |
| 100 | N | 8     | 0.01494  |
| 100 | C | 2     | 0.00373  |
| 100 | E | 1     | 0.00187  |
| 101 | V | 17349 | 32.39715 |
| 101 | M | 17048 | 31.83507 |
| 101 | L | 12109 | 22.61209 |
| 101 | T | 2047  | 3.82252  |
| 101 | I | 1447  | 2.7021   |
| 101 | R | 1378  | 2.57325  |
| 101 | K | 890   | 1.66197  |
| 101 | A | 388   | 0.72454  |
| 101 | Q | 265   | 0.49486  |
| 101 | E | 204   | 0.38095  |
| 101 | H | 134   | 0.25023  |
| 101 | F | 75    | 0.14005  |

|     |   |       |          |
|-----|---|-------|----------|
| 101 | P | 55    | 0.10271  |
| 101 | D | 48    | 0.08963  |
| 101 | S | 40    | 0.0747   |
| 101 | N | 36    | 0.06723  |
| 101 | G | 18    | 0.03361  |
| 101 | Y | 10    | 0.01867  |
| 101 | W | 9     | 0.01681  |
| 101 | C | 1     | 0.00187  |
| 102 | Y | 52905 | 98.79552 |
| 102 | H | 294   | 0.54902  |
| 102 | C | 169   | 0.31559  |
| 102 | F | 114   | 0.21289  |
| 102 | N | 49    | 0.0915   |
| 102 | S | 11    | 0.02054  |
| 102 | D | 5     | 0.00934  |
| 102 | L | 1     | 0.00187  |
| 102 | R | 1     | 0.00187  |
| 102 | W | 1     | 0.00187  |
| 103 | Y | 48247 | 90.22853 |
| 103 | F | 2622  | 4.9035   |
| 103 | S | 879   | 1.64385  |
| 103 | H | 532   | 0.99491  |
| 103 | R | 239   | 0.44696  |
| 103 | W | 195   | 0.36468  |
| 103 | I | 192   | 0.35907  |
| 103 | T | 143   | 0.26743  |
| 103 | L | 139   | 0.25995  |
| 103 | C | 126   | 0.23564  |
| 103 | N | 63    | 0.11782  |
| 103 | V | 59    | 0.11034  |
| 103 | D | 12    | 0.02244  |
| 103 | A | 11    | 0.02057  |
| 103 | Q | 8     | 0.01496  |
| 103 | G | 2     | 0.00374  |
| 103 | P | 2     | 0.00374  |
| 103 | K | 1     | 0.00187  |
| 104 | C | 53030 | 99.6842  |
| 104 | R | 82    | 0.15414  |
| 104 | F | 33    | 0.06203  |
| 104 | S | 21    | 0.03948  |
| 104 | Y | 15    | 0.0282   |
| 104 | W | 14    | 0.02632  |
| 104 | G | 3     | 0.00564  |
| 105 | A | 852   | 88.93528 |
| 105 | T | 54    | 5.63674  |
| 105 | V | 40    | 4.17537  |

|     |   |     |          |
|-----|---|-----|----------|
| 105 | S | 4   | 0.41754  |
| 105 | G | 2   | 0.20877  |
| 105 | L | 2   | 0.20877  |
| 105 | P | 2   | 0.20877  |
| 105 | I | 1   | 0.10438  |
| 105 | K | 1   | 0.10438  |
| 106 | A | 106 | 40.30418 |
| 106 | R | 90  | 34.22053 |
| 106 | K | 26  | 9.88593  |
| 106 | G | 20  | 7.60456  |
| 106 | L | 5   | 1.90114  |
| 106 | S | 5   | 1.90114  |
| 106 | T | 5   | 1.90114  |
| 106 | Q | 2   | 0.76046  |
| 106 | V | 2   | 0.76046  |
| 106 | E | 1   | 0.38023  |
| 106 | I | 1   | 0.38023  |

**Table S8: 3-VHH**

| The positions of amino acids | Amino acids | Counts | Percentage(%) |
|------------------------------|-------------|--------|---------------|
| 1                            | H           | 30537  | 67.19403      |
| 1                            | D           | 9150   | 20.13379      |
| 1                            | Q           | 4063   | 8.94028       |
| 1                            | E           | 779    | 1.71412       |
| 1                            | S           | 389    | 0.85596       |
| 1                            | M           | 171    | 0.37627       |
| 1                            | L           | 88     | 0.19364       |
| 1                            | P           | 57     | 0.12542       |
| 1                            | Y           | 57     | 0.12542       |
| 1                            | A           | 53     | 0.11662       |
| 1                            | N           | 26     | 0.05721       |
| 1                            | R           | 18     | 0.03961       |
| 1                            | W           | 17     | 0.03741       |
| 1                            | G           | 15     | 0.03301       |
| 1                            | V           | 11     | 0.0242        |
| 1                            | C           | 10     | 0.022         |
| 1                            | K           | 3      | 0.0066        |
| 1                            | F           | 1      | 0.0022        |
| 1                            | I           | 1      | 0.0022        |
| 2                            | V           | 44956  | 98.47758      |
| 2                            | C           | 287    | 0.62868       |
| 2                            | M           | 103    | 0.22562       |
| 2                            | L           | 95     | 0.2081        |
| 2                            | W           | 62     | 0.13581       |
| 2                            | G           | 53     | 0.1161        |
| 2                            | A           | 44     | 0.09638       |
| 2                            | E           | 14     | 0.03067       |
| 2                            | Q           | 8      | 0.01752       |
| 2                            | S           | 8      | 0.01752       |
| 2                            | H           | 7      | 0.01533       |
| 2                            | R           | 7      | 0.01533       |
| 2                            | D           | 4      | 0.00876       |
| 2                            | I           | 2      | 0.00438       |
| 2                            | Y           | 1      | 0.00219       |
| 3                            | Q           | 48048  | 98.9049       |
| 3                            | A           | 242    | 0.49815       |
| 3                            | P           | 65     | 0.1338        |
| 3                            | C           | 41     | 0.0844        |
| 3                            | S           | 40     | 0.08234       |
| 3                            | L           | 28     | 0.05764       |
| 3                            | V           | 27     | 0.05558       |
| 3                            | E           | 24     | 0.0494        |
| 3                            | K           | 24     | 0.0494        |

|   |   |       |          |
|---|---|-------|----------|
| 3 | R | 24    | 0.0494   |
| 3 | H | 8     | 0.01647  |
| 3 | G | 4     | 0.00823  |
| 3 | W | 3     | 0.00618  |
| 3 | M | 1     | 0.00206  |
| 3 | T | 1     | 0.00206  |
| 4 | L | 48497 | 99.13938 |
| 4 | A | 183   | 0.3741   |
| 4 | P | 49    | 0.10017  |
| 4 | W | 38    | 0.07768  |
| 4 | Q | 37    | 0.07564  |
| 4 | S | 35    | 0.07155  |
| 4 | V | 34    | 0.0695   |
| 4 | M | 31    | 0.06337  |
| 4 | R | 10    | 0.02044  |
| 4 | C | 1     | 0.00204  |
| 4 | F | 1     | 0.00204  |
| 4 | I | 1     | 0.00204  |
| 4 | T | 1     | 0.00204  |
| 5 | V | 49036 | 99.39797 |
| 5 | G | 139   | 0.28176  |
| 5 | W | 50    | 0.10135  |
| 5 | A | 34    | 0.06892  |
| 5 | L | 27    | 0.05473  |
| 5 | E | 19    | 0.03851  |
| 5 | M | 19    | 0.03851  |
| 5 | F | 5     | 0.01014  |
| 5 | C | 3     | 0.00608  |
| 5 | S | 1     | 0.00203  |
| 6 | E | 49163 | 99.49003 |
| 6 | G | 123   | 0.24891  |
| 6 | A | 31    | 0.06273  |
| 6 | V | 28    | 0.05666  |
| 6 | W | 15    | 0.03036  |
| 6 | S | 14    | 0.02833  |
| 6 | M | 12    | 0.02428  |
| 6 | D | 10    | 0.02024  |
| 6 | K | 7     | 0.01417  |
| 6 | Q | 4     | 0.00809  |
| 6 | Y | 4     | 0.00809  |
| 6 | C | 1     | 0.00202  |
| 6 | F | 1     | 0.00202  |
| 6 | I | 1     | 0.00202  |
| 6 | R | 1     | 0.00202  |
| 7 | S | 49292 | 99.51546 |
| 7 | V | 89    | 0.17968  |



|    |    |       |          |
|----|----|-------|----------|
| 7  | F  | 44    | 0.08883  |
| 7  | A  | 24    | 0.04845  |
| 7  | Y  | 24    | 0.04845  |
| 7  | P  | 21    | 0.0424   |
| 7  | L  | 14    | 0.02826  |
| 7  | T  | 13    | 0.02625  |
| 7  | C  | 5     | 0.01009  |
| 7  | G  | 3     | 0.00606  |
| 7  | D  | 1     | 0.00202  |
| 7  | I  | 1     | 0.00202  |
| 7  | R  | 1     | 0.00202  |
| 8  | G  | 49396 | 99.61683 |
| 8  | W  | 100   | 0.20167  |
| 8  | R  | 26    | 0.05243  |
| 8  | E  | 23    | 0.04638  |
| 8  | L  | 15    | 0.03025  |
| 8  | H  | 7     | 0.01412  |
| 8  | V  | 7     | 0.01412  |
| 8  | D  | 3     | 0.00605  |
| 8  | P  | 3     | 0.00605  |
| 8  | S  | 3     | 0.00605  |
| 8  | A  | 1     | 0.00202  |
| 8  | F  | 1     | 0.00202  |
| 8  | M  | 1     | 0.00202  |
| 9  | G  | 49331 | 99.33749 |
| 9  | E  | 88    | 0.1772   |
| 9  | A  | 85    | 0.17116  |
| 9  | R  | 76    | 0.15304  |
| 9  | M  | 33    | 0.06645  |
| 9  | V  | 32    | 0.06444  |
| 9  | D  | 7     | 0.0141   |
| 9  | C  | 3     | 0.00604  |
| 9  | P  | 3     | 0.00604  |
| 9  | L  | 1     | 0.00201  |
| 9  | T  | 1     | 0.00201  |
| 10 | NA | 0     | 0        |
| 11 | G  | 46439 | 93.40856 |
| 11 | D  | 1602  | 3.2223   |
| 11 | A  | 587   | 1.18071  |
| 11 | E  | 446   | 0.8971   |
| 11 | N  | 161   | 0.32384  |
| 11 | S  | 129   | 0.25947  |
| 11 | R  | 118   | 0.23735  |
| 11 | V  | 114   | 0.2293   |
| 11 | T  | 42    | 0.08448  |
| 11 | C  | 27    | 0.05431  |

|    |   |       |          |
|----|---|-------|----------|
| 11 | K | 18    | 0.03621  |
| 11 | Q | 13    | 0.02615  |
| 11 | H | 9     | 0.0181   |
| 11 | W | 8     | 0.01609  |
| 11 | F | 1     | 0.00201  |
| 11 | I | 1     | 0.00201  |
| 11 | P | 1     | 0.00201  |
| 12 | S | 46529 | 93.5576  |
| 12 | L | 1498  | 3.01208  |
| 12 | T | 608   | 1.22253  |
| 12 | A | 526   | 1.05765  |
| 12 | P | 338   | 0.67963  |
| 12 | E | 52    | 0.10456  |
| 12 | Q | 51    | 0.10255  |
| 12 | W | 36    | 0.07239  |
| 12 | V | 29    | 0.05831  |
| 12 | D | 18    | 0.03619  |
| 12 | R | 11    | 0.02212  |
| 12 | H | 10    | 0.02011  |
| 12 | F | 8     | 0.01609  |
| 12 | K | 8     | 0.01609  |
| 12 | M | 5     | 0.01005  |
| 12 | Y | 3     | 0.00603  |
| 12 | C | 1     | 0.00201  |
| 12 | G | 1     | 0.00201  |
| 12 | I | 1     | 0.00201  |
| 13 | V | 47803 | 96.07098 |
| 13 | A | 1555  | 3.12513  |
| 13 | M | 106   | 0.21303  |
| 13 | E | 92    | 0.18489  |
| 13 | G | 61    | 0.12259  |
| 13 | L | 51    | 0.1025   |
| 13 | I | 31    | 0.0623   |
| 13 | T | 31    | 0.0623   |
| 13 | C | 8     | 0.01608  |
| 13 | S | 7     | 0.01407  |
| 13 | P | 6     | 0.01206  |
| 13 | R | 4     | 0.00804  |
| 13 | D | 2     | 0.00402  |
| 13 | Q | 1     | 0.00201  |
| 14 | Q | 45994 | 92.40382 |
| 14 | E | 1920  | 3.85736  |
| 14 | R | 607   | 1.21949  |
| 14 | L | 395   | 0.79357  |
| 14 | H | 229   | 0.46007  |
| 14 | P | 214   | 0.42993  |

|    |   |       |          |
|----|---|-------|----------|
| 14 | K | 152   | 0.30537  |
| 14 | T | 97    | 0.19488  |
| 14 | A | 69    | 0.13862  |
| 14 | D | 17    | 0.03415  |
| 14 | Y | 17    | 0.03415  |
| 14 | N | 14    | 0.02813  |
| 14 | G | 11    | 0.0221   |
| 14 | S | 10    | 0.02009  |
| 14 | V | 9     | 0.01808  |
| 14 | C | 8     | 0.01607  |
| 14 | M | 8     | 0.01607  |
| 14 | W | 3     | 0.00603  |
| 14 | F | 1     | 0.00201  |
| 15 | A | 39087 | 78.50214 |
| 15 | P | 4883  | 9.80699  |
| 15 | T | 3021  | 6.06736  |
| 15 | V | 1124  | 2.25744  |
| 15 | S | 743   | 1.49224  |
| 15 | D | 320   | 0.64269  |
| 15 | E | 162   | 0.32536  |
| 15 | G | 152   | 0.30528  |
| 15 | I | 105   | 0.21088  |
| 15 | N | 68    | 0.13657  |
| 15 | R | 50    | 0.10042  |
| 15 | L | 43    | 0.08636  |
| 15 | H | 12    | 0.0241   |
| 15 | Y | 7     | 0.01406  |
| 15 | F | 6     | 0.01205  |
| 15 | Q | 4     | 0.00803  |
| 15 | C | 3     | 0.00603  |
| 15 | K | 1     | 0.00201  |
| 16 | G | 49371 | 99.10671 |
| 16 | E | 232   | 0.46571  |
| 16 | R | 120   | 0.24089  |
| 16 | D | 26    | 0.05219  |
| 16 | A | 24    | 0.04818  |
| 16 | V | 23    | 0.04617  |
| 16 | W | 13    | 0.0261   |
| 16 | S | 3     | 0.00602  |
| 16 | H | 1     | 0.00201  |
| 16 | K | 1     | 0.00201  |
| 16 | N | 1     | 0.00201  |
| 16 | T | 1     | 0.00201  |
| 17 | G | 47092 | 94.49394 |
| 17 | E | 1714  | 3.43928  |
| 17 | R | 384   | 0.77053  |

|    |   |       |          |
|----|---|-------|----------|
| 17 | D | 147   | 0.29497  |
| 17 | A | 110   | 0.22072  |
| 17 | T | 104   | 0.20868  |
| 17 | Q | 88    | 0.17658  |
| 17 | V | 56    | 0.11237  |
| 17 | W | 32    | 0.06421  |
| 17 | S | 31    | 0.0622   |
| 17 | K | 27    | 0.05418  |
| 17 | N | 22    | 0.04414  |
| 17 | Y | 20    | 0.04013  |
| 17 | M | 7     | 0.01405  |
| 17 | H | 1     | 0.00201  |
| 17 | L | 1     | 0.00201  |
| 18 | S | 48704 | 97.65213 |
| 18 | T | 398   | 0.79799  |
| 18 | A | 317   | 0.63559  |
| 18 | P | 244   | 0.48922  |
| 18 | F | 105   | 0.21053  |
| 18 | Y | 41    | 0.08221  |
| 18 | N | 15    | 0.03008  |
| 18 | D | 9     | 0.01805  |
| 18 | C | 6     | 0.01203  |
| 18 | L | 6     | 0.01203  |
| 18 | H | 5     | 0.01003  |
| 18 | M | 5     | 0.01003  |
| 18 | V | 5     | 0.01003  |
| 18 | R | 4     | 0.00802  |
| 18 | Q | 3     | 0.00602  |
| 18 | W | 3     | 0.00602  |
| 18 | E | 2     | 0.00401  |
| 18 | G | 2     | 0.00401  |
| 18 | I | 1     | 0.00201  |
| 19 | L | 48243 | 96.67936 |
| 19 | V | 686   | 1.37475  |
| 19 | M | 272   | 0.54509  |
| 19 | R | 246   | 0.49299  |
| 19 | P | 209   | 0.41884  |
| 19 | Q | 139   | 0.27856  |
| 19 | T | 39    | 0.07816  |
| 19 | A | 26    | 0.0521   |
| 19 | H | 19    | 0.03808  |
| 19 | S | 7     | 0.01403  |
| 19 | W | 5     | 0.01002  |
| 19 | I | 4     | 0.00802  |
| 19 | F | 2     | 0.00401  |
| 19 | C | 1     | 0.002    |

|    |   |       |          |
|----|---|-------|----------|
| 19 | E | 1     | 0.002    |
| 19 | G | 1     | 0.002    |
| 20 | R | 40880 | 81.88774 |
| 20 | T | 4666  | 9.34658  |
| 20 | K | 2546  | 5.09996  |
| 20 | S | 457   | 0.91543  |
| 20 | N | 358   | 0.71712  |
| 20 | G | 303   | 0.60695  |
| 20 | I | 232   | 0.46472  |
| 20 | Q | 138   | 0.27643  |
| 20 | E | 109   | 0.21834  |
| 20 | L | 86    | 0.17227  |
| 20 | V | 66    | 0.13221  |
| 20 | A | 47    | 0.09415  |
| 20 | M | 17    | 0.03405  |
| 20 | D | 7     | 0.01402  |
| 20 | P | 3     | 0.00601  |
| 20 | W | 3     | 0.00601  |
| 20 | C | 2     | 0.00401  |
| 20 | H | 2     | 0.00401  |
| 21 | L | 48867 | 97.78289 |
| 21 | V | 470   | 0.94047  |
| 21 | I | 212   | 0.42421  |
| 21 | P | 211   | 0.42221  |
| 21 | H | 91    | 0.18209  |
| 21 | F | 62    | 0.12406  |
| 21 | G | 34    | 0.06803  |
| 21 | R | 9     | 0.01801  |
| 21 | A | 7     | 0.01401  |
| 21 | S | 6     | 0.01201  |
| 21 | M | 3     | 0.006    |
| 21 | Q | 2     | 0.004    |
| 21 | T | 1     | 0.002    |
| 22 | S | 47220 | 94.40601 |
| 22 | A | 1091  | 2.18121  |
| 22 | T | 1091  | 2.18121  |
| 22 | P | 164   | 0.32788  |
| 22 | F | 96    | 0.19193  |
| 22 | D | 76    | 0.15195  |
| 22 | N | 61    | 0.12196  |
| 22 | G | 57    | 0.11396  |
| 22 | V | 41    | 0.08197  |
| 22 | I | 35    | 0.06997  |
| 22 | L | 22    | 0.04398  |
| 22 | R | 16    | 0.03199  |
| 22 | Y | 12    | 0.02399  |

|    |   |       |          |
|----|---|-------|----------|
| 22 | H | 9     | 0.01799  |
| 22 | Q | 9     | 0.01799  |
| 22 | C | 8     | 0.01599  |
| 22 | E | 7     | 0.01399  |
| 22 | K | 2     | 0.004    |
| 22 | M | 1     | 0.002    |
| 23 | C | 49624 | 99.16272 |
| 23 | R | 202   | 0.40365  |
| 23 | S | 75    | 0.14987  |
| 23 | Y | 68    | 0.13588  |
| 23 | W | 27    | 0.05395  |
| 23 | G | 17    | 0.03397  |
| 23 | F | 14    | 0.02798  |
| 23 | L | 12    | 0.02398  |
| 23 | A | 2     | 0.004    |
| 23 | H | 1     | 0.002    |
| 23 | M | 1     | 0.002    |
| 24 | A | 26232 | 52.39484 |
| 24 | V | 8410  | 16.79783 |
| 24 | T | 5474  | 10.93357 |
| 24 | E | 2951  | 5.89422  |
| 24 | G | 2129  | 4.25239  |
| 24 | S | 1451  | 2.89817  |
| 24 | K | 828   | 1.65382  |
| 24 | R | 604   | 1.20641  |
| 24 | L | 567   | 1.13251  |
| 24 | D | 531   | 1.0606   |
| 24 | Q | 483   | 0.96473  |
| 24 | I | 299   | 0.59721  |
| 24 | P | 41    | 0.08189  |
| 24 | H | 18    | 0.03595  |
| 24 | N | 17    | 0.03396  |
| 24 | Y | 11    | 0.02197  |
| 24 | C | 9     | 0.01798  |
| 24 | M | 6     | 0.01198  |
| 24 | F | 5     | 0.00999  |
| 25 | A | 33165 | 66.23198 |
| 25 | V | 7064  | 14.10712 |
| 25 | T | 1503  | 3.00156  |
| 25 | F | 1423  | 2.84179  |
| 25 | G | 1324  | 2.64409  |
| 25 | I | 1322  | 2.64009  |
| 25 | S | 1070  | 2.13684  |
| 25 | P | 930   | 1.85725  |
| 25 | Y | 703   | 1.40392  |
| 25 | L | 429   | 0.85673  |

|    |   |       |          |
|----|---|-------|----------|
| 25 | H | 260   | 0.51923  |
| 25 | R | 192   | 0.38343  |
| 25 | D | 175   | 0.34948  |
| 25 | M | 146   | 0.29157  |
| 25 | E | 88    | 0.17574  |
| 25 | W | 88    | 0.17574  |
| 25 | N | 84    | 0.16775  |
| 25 | Q | 72    | 0.14379  |
| 25 | K | 21    | 0.04194  |
| 25 | C | 15    | 0.02996  |
| 26 | S | 43043 | 85.93132 |
| 26 | P | 1806  | 3.60551  |
| 26 | G | 1166  | 2.32781  |
| 26 | R | 905   | 1.80675  |
| 26 | T | 868   | 1.73288  |
| 26 | D | 648   | 1.29367  |
| 26 | A | 471   | 0.94031  |
| 26 | Y | 234   | 0.46716  |
| 26 | F | 197   | 0.39329  |
| 26 | N | 172   | 0.34338  |
| 26 | I | 157   | 0.31344  |
| 26 | V | 149   | 0.29746  |
| 26 | L | 93    | 0.18567  |
| 26 | H | 84    | 0.1677   |
| 26 | K | 40    | 0.07986  |
| 26 | C | 17    | 0.03394  |
| 26 | E | 16    | 0.03194  |
| 26 | Q | 15    | 0.02995  |
| 26 | W | 7     | 0.01397  |
| 26 | M | 2     | 0.00399  |
| 27 | G | 38953 | 77.73188 |
| 27 | R | 3013  | 6.01253  |
| 27 | E | 1879  | 3.7496   |
| 27 | A | 1673  | 3.33852  |
| 27 | T | 1079  | 2.15318  |
| 27 | V | 967   | 1.92968  |
| 27 | L | 522   | 1.04167  |
| 27 | D | 425   | 0.8481   |
| 27 | K | 404   | 0.80619  |
| 27 | P | 293   | 0.58469  |
| 27 | S | 278   | 0.55476  |
| 27 | Q | 248   | 0.49489  |
| 27 | I | 153   | 0.30532  |
| 27 | N | 97    | 0.19357  |
| 27 | F | 36    | 0.07184  |
| 27 | H | 36    | 0.07184  |

|    |   |       |          |
|----|---|-------|----------|
| 27 | Y | 26    | 0.05188  |
| 27 | M | 14    | 0.02794  |
| 27 | W | 14    | 0.02794  |
| 27 | C | 2     | 0.00399  |
| 28 | Y | 23665 | 47.19879 |
| 28 | S | 5122  | 10.2156  |
| 28 | F | 4800  | 9.57339  |
| 28 | D | 3044  | 6.07112  |
| 28 | N | 1865  | 3.71966  |
| 28 | L | 1855  | 3.69971  |
| 28 | H | 1742  | 3.47434  |
| 28 | R | 1516  | 3.02359  |
| 28 | I | 1302  | 2.59678  |
| 28 | A | 1217  | 2.42725  |
| 28 | G | 1112  | 2.21783  |
| 28 | V | 931   | 1.85684  |
| 28 | P | 583   | 1.16277  |
| 28 | T | 433   | 0.8636   |
| 28 | W | 319   | 0.63623  |
| 28 | E | 201   | 0.40089  |
| 28 | Q | 141   | 0.28122  |
| 28 | K | 134   | 0.26726  |
| 28 | C | 107   | 0.21341  |
| 28 | M | 50    | 0.09972  |
| 29 | T | 28999 | 57.79456 |
| 29 | I | 6130  | 12.217   |
| 29 | S | 4026  | 8.02376  |
| 29 | A | 2649  | 5.27942  |
| 29 | P | 1490  | 2.96955  |
| 29 | R | 1358  | 2.70647  |
| 29 | L | 963   | 1.91924  |
| 29 | D | 763   | 1.52065  |
| 29 | V | 721   | 1.43694  |
| 29 | G | 590   | 1.17586  |
| 29 | N | 571   | 1.13799  |
| 29 | M | 566   | 1.12803  |
| 29 | K | 348   | 0.69356  |
| 29 | F | 322   | 0.64174  |
| 29 | Y | 224   | 0.44643  |
| 29 | H | 157   | 0.3129   |
| 29 | E | 129   | 0.2571   |
| 29 | Q | 109   | 0.21724  |
| 29 | W | 51    | 0.10164  |
| 29 | C | 10    | 0.01993  |
| 30 | Y | 22254 | 44.32626 |
| 30 | F | 5552  | 11.05866 |



|    |   |       |          |
|----|---|-------|----------|
| 30 | V | 3215  | 6.40374  |
| 30 | S | 3151  | 6.27627  |
| 30 | D | 2499  | 4.97759  |
| 30 | A | 2382  | 4.74455  |
| 30 | G | 1602  | 3.19092  |
| 30 | I | 1364  | 2.71686  |
| 30 | L | 1260  | 2.50971  |
| 30 | E | 1097  | 2.18504  |
| 30 | R | 1095  | 2.18106  |
| 30 | P | 903   | 1.79863  |
| 30 | T | 868   | 1.72891  |
| 30 | N | 854   | 1.70103  |
| 30 | H | 799   | 1.59147  |
| 30 | Q | 577   | 1.14929  |
| 30 | W | 335   | 0.66726  |
| 30 | K | 193   | 0.38442  |
| 30 | C | 109   | 0.21711  |
| 30 | M | 96    | 0.19122  |
| 31 | S | 20489 | 40.78712 |
| 31 | N | 6872  | 13.67998 |
| 31 | G | 4907  | 9.76828  |
| 31 | R | 4174  | 8.30911  |
| 31 | D | 3683  | 7.33169  |
| 31 | T | 2412  | 4.80153  |
| 31 | K | 1851  | 3.68476  |
| 31 | A | 1560  | 3.10547  |
| 31 | C | 645   | 1.28399  |
| 31 | I | 586   | 1.16654  |
| 31 | V | 483   | 0.9615   |
| 31 | E | 440   | 0.8759   |
| 31 | L | 435   | 0.86595  |
| 31 | F | 326   | 0.64896  |
| 31 | P | 323   | 0.64299  |
| 31 | M | 310   | 0.61711  |
| 31 | H | 255   | 0.50762  |
| 31 | Y | 243   | 0.48374  |
| 31 | Q | 128   | 0.25481  |
| 31 | W | 112   | 0.22296  |
| 32 | R | 10387 | 20.66242 |
| 32 | S | 10341 | 20.57092 |
| 32 | T | 7600  | 15.11836 |
| 32 | D | 3913  | 7.78397  |
| 32 | N | 3684  | 7.32843  |
| 32 | G | 3304  | 6.57251  |
| 32 | I | 1803  | 3.58663  |
| 32 | A | 1574  | 3.13109  |

|    |   |       |          |
|----|---|-------|----------|
| 32 | K | 1574  | 3.13109  |
| 32 | P | 1163  | 2.31351  |
| 32 | Y | 822   | 1.63517  |
| 32 | M | 684   | 1.36065  |
| 32 | L | 659   | 1.31092  |
| 32 | E | 618   | 1.22936  |
| 32 | V | 615   | 1.22339  |
| 32 | H | 559   | 1.112    |
| 32 | W | 304   | 0.60473  |
| 32 | Q | 302   | 0.60076  |
| 32 | F | 267   | 0.53113  |
| 32 | C | 97    | 0.19296  |
| 33 | Y | 15181 | 30.17671 |
| 33 | N | 11630 | 23.11806 |
| 33 | A | 3305  | 6.56966  |
| 33 | S | 2560  | 5.08876  |
| 33 | H | 2524  | 5.01719  |
| 33 | G | 2182  | 4.33737  |
| 33 | F | 1725  | 3.42895  |
| 33 | C | 1511  | 3.00356  |
| 33 | D | 1279  | 2.54239  |
| 33 | V | 1229  | 2.443    |
| 33 | R | 1228  | 2.44101  |
| 33 | L | 1193  | 2.37144  |
| 33 | W | 1092  | 2.17067  |
| 33 | T | 897   | 1.78305  |
| 33 | K | 865   | 1.71944  |
| 33 | I | 741   | 1.47296  |
| 33 | P | 498   | 0.98992  |
| 33 | M | 420   | 0.83487  |
| 33 | Q | 125   | 0.24847  |
| 33 | E | 122   | 0.24251  |
| 34 | C | 37423 | 74.25788 |
| 34 | Y | 3031  | 6.01437  |
| 34 | S | 1857  | 3.68482  |
| 34 | D | 1648  | 3.2701   |
| 34 | R | 1315  | 2.60933  |
| 34 | A | 1002  | 1.98825  |
| 34 | G | 956   | 1.89698  |
| 34 | F | 680   | 1.34931  |
| 34 | V | 594   | 1.17866  |
| 34 | T | 342   | 0.67863  |
| 34 | W | 289   | 0.57346  |
| 34 | L | 252   | 0.50004  |
| 34 | N | 233   | 0.46234  |
| 34 | H | 220   | 0.43654  |

|    |    |       |          |
|----|----|-------|----------|
| 34 | E  | 211   | 0.41868  |
| 34 | I  | 122   | 0.24208  |
| 34 | P  | 106   | 0.21033  |
| 34 | Q  | 55    | 0.10914  |
| 34 | K  | 44    | 0.08731  |
| 34 | M  | 16    | 0.03175  |
| 35 | NA | 0     | 0        |
| 36 | NA | 0     | 0        |
| 37 | NA | 0     | 0        |
| 38 | NA | 0     | 0        |
| 39 | M  | 39336 | 77.8191  |
| 39 | V  | 4172  | 8.25354  |
| 39 | L  | 3324  | 6.57593  |
| 39 | I  | 2194  | 4.34043  |
| 39 | F  | 308   | 0.60932  |
| 39 | T  | 266   | 0.52623  |
| 39 | W  | 262   | 0.51832  |
| 39 | A  | 213   | 0.42138  |
| 39 | K  | 135   | 0.26707  |
| 39 | R  | 133   | 0.26312  |
| 39 | G  | 51    | 0.10089  |
| 39 | S  | 51    | 0.10089  |
| 39 | Y  | 39    | 0.07715  |
| 39 | Q  | 21    | 0.04154  |
| 39 | E  | 20    | 0.03957  |
| 39 | C  | 7     | 0.01385  |
| 39 | P  | 7     | 0.01385  |
| 39 | H  | 5     | 0.00989  |
| 39 | N  | 3     | 0.00593  |
| 39 | D  | 1     | 0.00198  |
| 40 | G  | 31644 | 61.96201 |
| 40 | A  | 16196 | 31.71333 |
| 40 | S  | 1475  | 2.88819  |
| 40 | T  | 422   | 0.82632  |
| 40 | D  | 290   | 0.56785  |
| 40 | V  | 226   | 0.44253  |
| 40 | Y  | 146   | 0.28588  |
| 40 | R  | 117   | 0.2291   |
| 40 | E  | 102   | 0.19973  |
| 40 | L  | 96    | 0.18798  |
| 40 | N  | 96    | 0.18798  |
| 40 | H  | 70    | 0.13707  |
| 40 | K  | 50    | 0.0979   |
| 40 | M  | 43    | 0.0842   |
| 40 | C  | 25    | 0.04895  |
| 40 | Q  | 24    | 0.04699  |

|    |   |       |          |
|----|---|-------|----------|
| 40 | F | 23    | 0.04504  |
| 40 | I | 12    | 0.0235   |
| 40 | W | 9     | 0.01762  |
| 40 | P | 4     | 0.00783  |
| 41 | W | 50682 | 98.63574 |
| 41 | Y | 360   | 0.70062  |
| 41 | R | 209   | 0.40675  |
| 41 | F | 47    | 0.09147  |
| 41 | C | 27    | 0.05255  |
| 41 | L | 20    | 0.03892  |
| 41 | G | 14    | 0.02725  |
| 41 | S | 9     | 0.01752  |
| 41 | V | 7     | 0.01362  |
| 41 | I | 3     | 0.00584  |
| 41 | Q | 2     | 0.00389  |
| 41 | A | 1     | 0.00195  |
| 41 | H | 1     | 0.00195  |
| 41 | P | 1     | 0.00195  |
| 42 | F | 42053 | 81.36561 |
| 42 | Y | 3554  | 6.8764   |
| 42 | L | 2384  | 4.61265  |
| 42 | V | 1579  | 3.0551   |
| 42 | I | 1186  | 2.29471  |
| 42 | S | 345   | 0.66752  |
| 42 | W | 230   | 0.44501  |
| 42 | H | 116   | 0.22444  |
| 42 | A | 61    | 0.11802  |
| 42 | R | 42    | 0.08126  |
| 42 | N | 32    | 0.06191  |
| 42 | M | 27    | 0.05224  |
| 42 | C | 26    | 0.05031  |
| 42 | D | 23    | 0.0445   |
| 42 | T | 12    | 0.02322  |
| 42 | P | 6     | 0.01161  |
| 42 | Q | 5     | 0.00967  |
| 42 | G | 2     | 0.00387  |
| 42 | E | 1     | 0.00193  |
| 43 | R | 51287 | 98.67439 |
| 43 | H | 430   | 0.8273   |
| 43 | C | 121   | 0.2328   |
| 43 | S | 43    | 0.08273  |
| 43 | L | 30    | 0.05772  |
| 43 | Q | 14    | 0.02694  |
| 43 | P | 11    | 0.02116  |
| 43 | W | 11    | 0.02116  |
| 43 | K | 10    | 0.01924  |

|    |   |       |          |
|----|---|-------|----------|
| 43 | G | 8     | 0.01539  |
| 43 | F | 3     | 0.00577  |
| 43 | V | 3     | 0.00577  |
| 43 | I | 2     | 0.00385  |
| 43 | A | 1     | 0.00192  |
| 43 | M | 1     | 0.00192  |
| 43 | Y | 1     | 0.00192  |
| 44 | Q | 49226 | 94.5109  |
| 44 | R | 1576  | 3.02582  |
| 44 | E | 485   | 0.93117  |
| 44 | L | 340   | 0.65278  |
| 44 | H | 121   | 0.23231  |
| 44 | K | 101   | 0.19391  |
| 44 | V | 57    | 0.10944  |
| 44 | A | 43    | 0.08256  |
| 44 | T | 33    | 0.06336  |
| 44 | S | 26    | 0.04992  |
| 44 | P | 24    | 0.04608  |
| 44 | M | 18    | 0.03456  |
| 44 | D | 13    | 0.02496  |
| 44 | G | 11    | 0.02112  |
| 44 | W | 8     | 0.01536  |
| 44 | C | 3     | 0.00576  |
| 45 | A | 37905 | 72.68038 |
| 45 | V | 4673  | 8.96017  |
| 45 | S | 1702  | 3.26347  |
| 45 | R | 1701  | 3.26156  |
| 45 | T | 1612  | 3.09091  |
| 45 | G | 1452  | 2.78412  |
| 45 | P | 1292  | 2.47733  |
| 45 | I | 499   | 0.9568   |
| 45 | L | 369   | 0.70753  |
| 45 | Y | 319   | 0.61166  |
| 45 | F | 231   | 0.44293  |
| 45 | D | 207   | 0.39691  |
| 45 | N | 62    | 0.11888  |
| 45 | K | 29    | 0.05561  |
| 45 | H | 27    | 0.05177  |
| 45 | E | 25    | 0.04794  |
| 45 | Q | 17    | 0.0326   |
| 45 | M | 15    | 0.02876  |
| 45 | C | 14    | 0.02684  |
| 45 | W | 2     | 0.00383  |
| 46 | P | 47534 | 90.96546 |
| 46 | S | 1942  | 3.71639  |
| 46 | A | 1139  | 2.1797   |

|    |   |       |          |
|----|---|-------|----------|
| 46 | T | 485   | 0.92814  |
| 46 | L | 471   | 0.90135  |
| 46 | Q | 232   | 0.44398  |
| 46 | E | 120   | 0.22964  |
| 46 | V | 75    | 0.14353  |
| 46 | R | 67    | 0.12822  |
| 46 | I | 59    | 0.11291  |
| 46 | G | 42    | 0.08038  |
| 46 | D | 41    | 0.07846  |
| 46 | K | 20    | 0.03827  |
| 46 | H | 9     | 0.01722  |
| 46 | M | 7     | 0.0134   |
| 46 | C | 5     | 0.00957  |
| 46 | F | 4     | 0.00765  |
| 46 | N | 1     | 0.00191  |
| 46 | W | 1     | 0.00191  |
| 46 | Y | 1     | 0.00191  |
| 47 | G | 51059 | 97.53018 |
| 47 | E | 464   | 0.88631  |
| 47 | R | 197   | 0.3763   |
| 47 | D | 177   | 0.3381   |
| 47 | A | 144   | 0.27506  |
| 47 | S | 48    | 0.09169  |
| 47 | V | 43    | 0.08214  |
| 47 | N | 41    | 0.07832  |
| 47 | T | 37    | 0.07068  |
| 47 | L | 35    | 0.06686  |
| 47 | W | 30    | 0.0573   |
| 47 | P | 23    | 0.04393  |
| 47 | K | 22    | 0.04202  |
| 47 | Q | 18    | 0.03438  |
| 47 | M | 6     | 0.01146  |
| 47 | H | 4     | 0.00764  |
| 47 | Y | 4     | 0.00764  |
| 48 | K | 43979 | 83.89257 |
| 48 | N | 2101  | 4.00778  |
| 48 | Q | 1942  | 3.70448  |
| 48 | R | 1026  | 1.95716  |
| 48 | E | 888   | 1.69391  |
| 48 | S | 549   | 1.04725  |
| 48 | L | 412   | 0.78591  |
| 48 | T | 390   | 0.74395  |
| 48 | M | 367   | 0.70007  |
| 48 | G | 271   | 0.51695  |
| 48 | A | 212   | 0.4044   |
| 48 | D | 130   | 0.24798  |

|    |   |       |          |
|----|---|-------|----------|
| 48 | H | 62    | 0.11827  |
| 48 | Y | 23    | 0.04387  |
| 48 | V | 17    | 0.03243  |
| 48 | F | 16    | 0.03052  |
| 48 | P | 16    | 0.03052  |
| 48 | I | 15    | 0.02861  |
| 48 | W | 6     | 0.01145  |
| 48 | C | 1     | 0.00191  |
| 49 | E | 42283 | 80.48233 |
| 49 | G | 2279  | 4.3379   |
| 49 | D | 2200  | 4.18752  |
| 49 | Q | 2008  | 3.82207  |
| 49 | A | 1348  | 2.56581  |
| 49 | K | 1037  | 1.97385  |
| 49 | R | 277   | 0.52725  |
| 49 | S | 253   | 0.48157  |
| 49 | P | 233   | 0.4435   |
| 49 | V | 197   | 0.37497  |
| 49 | N | 139   | 0.26458  |
| 49 | L | 92    | 0.17511  |
| 49 | T | 68    | 0.12943  |
| 49 | M | 47    | 0.08946  |
| 49 | H | 23    | 0.04378  |
| 49 | Y | 21    | 0.03997  |
| 49 | W | 17    | 0.03236  |
| 49 | I | 8     | 0.01523  |
| 49 | F | 6     | 0.01142  |
| 49 | C | 1     | 0.0019   |
| 50 | R | 49551 | 94.11754 |
| 50 | C | 1480  | 2.81112  |
| 50 | P | 649   | 1.23272  |
| 50 | L | 349   | 0.66289  |
| 50 | H | 312   | 0.59262  |
| 50 | S | 63    | 0.11966  |
| 50 | Y | 61    | 0.11586  |
| 50 | V | 41    | 0.07788  |
| 50 | G | 40    | 0.07598  |
| 50 | N | 25    | 0.04749  |
| 50 | A | 22    | 0.04179  |
| 50 | F | 10    | 0.01899  |
| 50 | Q | 10    | 0.01899  |
| 50 | D | 7     | 0.0133   |
| 50 | I | 6     | 0.0114   |
| 50 | T | 6     | 0.0114   |
| 50 | K | 5     | 0.0095   |
| 50 | M | 5     | 0.0095   |

|    |   |       |          |
|----|---|-------|----------|
| 50 | E | 4     | 0.0076   |
| 50 | W | 2     | 0.0038   |
| 51 | E | 50259 | 95.29218 |
| 51 | D | 803   | 1.52251  |
| 51 | V | 399   | 0.75651  |
| 51 | A | 317   | 0.60104  |
| 51 | Q | 290   | 0.54985  |
| 51 | G | 252   | 0.4778   |
| 51 | K | 192   | 0.36404  |
| 51 | R | 70    | 0.13272  |
| 51 | S | 60    | 0.11376  |
| 51 | L | 35    | 0.06636  |
| 51 | T | 20    | 0.03792  |
| 51 | M | 14    | 0.02654  |
| 51 | N | 14    | 0.02654  |
| 51 | H | 4     | 0.00758  |
| 51 | I | 4     | 0.00758  |
| 51 | W | 3     | 0.00569  |
| 51 | Y | 3     | 0.00569  |
| 51 | F | 2     | 0.00379  |
| 51 | P | 1     | 0.0019   |
| 52 | G | 38931 | 73.73994 |
| 52 | A | 3810  | 7.21659  |
| 52 | W | 2281  | 4.32048  |
| 52 | L | 1965  | 3.72194  |
| 52 | R | 1432  | 2.71238  |
| 52 | E | 1080  | 2.04565  |
| 52 | V | 912   | 1.72744  |
| 52 | F | 765   | 1.449    |
| 52 | T | 341   | 0.64589  |
| 52 | M | 324   | 0.61369  |
| 52 | K | 272   | 0.5152   |
| 52 | P | 255   | 0.483    |
| 52 | S | 128   | 0.24245  |
| 52 | D | 92    | 0.17426  |
| 52 | Q | 89    | 0.16858  |
| 52 | I | 44    | 0.08334  |
| 52 | Y | 35    | 0.06629  |
| 52 | H | 18    | 0.03409  |
| 52 | N | 14    | 0.02652  |
| 52 | C | 7     | 0.01326  |
| 53 | V | 46072 | 87.15359 |
| 53 | I | 4123  | 7.79941  |
| 53 | L | 2247  | 4.25061  |
| 53 | A | 197   | 0.37266  |
| 53 | D | 81    | 0.15323  |



|    |   |       |          |
|----|---|-------|----------|
| 53 | F | 44    | 0.08323  |
| 53 | G | 38    | 0.07188  |
| 53 | C | 16    | 0.03027  |
| 53 | T | 14    | 0.02648  |
| 53 | M | 12    | 0.0227   |
| 53 | P | 8     | 0.01513  |
| 53 | H | 3     | 0.00568  |
| 53 | S | 3     | 0.00568  |
| 53 | E | 2     | 0.00378  |
| 53 | N | 1     | 0.00189  |
| 53 | R | 1     | 0.00189  |
| 53 | W | 1     | 0.00189  |
| 54 | A | 47662 | 90.03192 |
| 54 | S | 3005  | 5.67634  |
| 54 | G | 1352  | 2.55388  |
| 54 | V | 548   | 1.03515  |
| 54 | T | 230   | 0.43446  |
| 54 | I | 37    | 0.06989  |
| 54 | L | 31    | 0.05856  |
| 54 | P | 30    | 0.05667  |
| 54 | E | 14    | 0.02645  |
| 54 | Q | 10    | 0.01889  |
| 54 | C | 5     | 0.00944  |
| 54 | D | 5     | 0.00944  |
| 54 | R | 4     | 0.00756  |
| 54 | W | 2     | 0.00378  |
| 54 | Y | 2     | 0.00378  |
| 54 | F | 1     | 0.00189  |
| 54 | K | 1     | 0.00189  |
| 55 | A | 16164 | 30.49236 |
| 55 | S | 7696  | 14.51802 |
| 55 | T | 7286  | 13.74458 |
| 55 | R | 5905  | 11.13941 |
| 55 | V | 5272  | 9.94529  |
| 55 | G | 2930  | 5.52726  |
| 55 | F | 1957  | 3.69176  |
| 55 | I | 989   | 1.86569  |
| 55 | C | 795   | 1.49972  |
| 55 | L | 703   | 1.32616  |
| 55 | Y | 637   | 1.20166  |
| 55 | H | 558   | 1.05263  |
| 55 | Q | 493   | 0.93001  |
| 55 | N | 456   | 0.86022  |
| 55 | D | 356   | 0.67157  |
| 55 | E | 335   | 0.63196  |
| 55 | M | 283   | 0.53386  |

|    |   |       |          |
|----|---|-------|----------|
| 55 | K | 99    | 0.18676  |
| 55 | W | 69    | 0.13016  |
| 55 | P | 27    | 0.05093  |
| 56 | I | 39704 | 74.82004 |
| 56 | L | 4597  | 8.6628   |
| 56 | V | 3695  | 6.96303  |
| 56 | M | 1139  | 2.14638  |
| 56 | F | 954   | 1.79776  |
| 56 | T | 842   | 1.5867   |
| 56 | H | 514   | 0.96861  |
| 56 | D | 322   | 0.60679  |
| 56 | A | 281   | 0.52953  |
| 56 | S | 250   | 0.47111  |
| 56 | R | 249   | 0.46923  |
| 56 | K | 152   | 0.28644  |
| 56 | Y | 83    | 0.15641  |
| 56 | N | 77    | 0.1451   |
| 56 | Q | 59    | 0.11118  |
| 56 | G | 50    | 0.09422  |
| 56 | C | 39    | 0.07349  |
| 56 | W | 31    | 0.05842  |
| 56 | P | 20    | 0.03769  |
| 56 | E | 8     | 0.01508  |
| 57 | D | 17905 | 33.7067  |
| 57 | Y | 9373  | 17.64495 |
| 57 | A | 5451  | 10.26167 |
| 57 | S | 3598  | 6.77334  |
| 57 | G | 2480  | 4.66867  |
| 57 | R | 2319  | 4.36559  |
| 57 | N | 2208  | 4.15663  |
| 57 | W | 1896  | 3.56928  |
| 57 | T | 1580  | 2.9744   |
| 57 | E | 1313  | 2.47176  |
| 57 | H | 1256  | 2.36446  |
| 57 | V | 974   | 1.83358  |
| 57 | F | 657   | 1.23682  |
| 57 | L | 480   | 0.90361  |
| 57 | M | 397   | 0.74736  |
| 57 | C | 373   | 0.70218  |
| 57 | K | 278   | 0.52334  |
| 57 | Q | 262   | 0.49322  |
| 57 | I | 200   | 0.37651  |
| 57 | P | 120   | 0.2259   |
| 58 | S | 15339 | 28.83054 |
| 58 | T | 14997 | 28.18773 |
| 58 | R | 4439  | 8.34336  |

|    |   |       |          |
|----|---|-------|----------|
| 58 | I | 2901  | 5.4526   |
| 58 | G | 2822  | 5.30411  |
| 58 | P | 2204  | 4.14255  |
| 58 | A | 2096  | 3.93955  |
| 58 | N | 1759  | 3.30614  |
| 58 | F | 1473  | 2.76859  |
| 58 | L | 1102  | 2.07127  |
| 58 | D | 940   | 1.76678  |
| 58 | V | 786   | 1.47733  |
| 58 | K | 734   | 1.3796   |
| 58 | Y | 389   | 0.73115  |
| 58 | M | 323   | 0.6071   |
| 58 | H | 306   | 0.57514  |
| 58 | E | 248   | 0.46613  |
| 58 | W | 141   | 0.26502  |
| 58 | Q | 135   | 0.25374  |
| 58 | C | 70    | 0.13157  |
| 59 | D | 20058 | 37.64216 |
| 59 | G | 16267 | 30.52772 |
| 59 | S | 2987  | 5.6056   |
| 59 | A | 2748  | 5.15708  |
| 59 | R | 2286  | 4.29006  |
| 59 | N | 1644  | 3.08524  |
| 59 | T | 1103  | 2.06996  |
| 59 | E | 1058  | 1.98551  |
| 59 | L | 1043  | 1.95736  |
| 59 | V | 1007  | 1.8898   |
| 59 | Y | 964   | 1.80911  |
| 59 | P | 490   | 0.91957  |
| 59 | F | 419   | 0.78632  |
| 59 | H | 385   | 0.72252  |
| 59 | I | 306   | 0.57426  |
| 59 | Q | 264   | 0.49544  |
| 59 | K | 159   | 0.29839  |
| 59 | W | 46    | 0.08633  |
| 59 | M | 33    | 0.06193  |
| 59 | C | 19    | 0.03566  |
| 60 | G | 36458 | 68.30923 |
| 60 | S | 5901  | 11.05636 |
| 60 | D | 3942  | 7.3859   |
| 60 | T | 2022  | 3.7885   |
| 60 | A | 1099  | 2.05913  |
| 60 | R | 882   | 1.65255  |
| 60 | N | 524   | 0.98179  |
| 60 | E | 485   | 0.90872  |
| 60 | L | 445   | 0.83377  |

|    |   |       |          |
|----|---|-------|----------|
| 60 | Y | 412   | 0.77194  |
| 60 | V | 311   | 0.5827   |
| 60 | H | 226   | 0.42344  |
| 60 | I | 194   | 0.36349  |
| 60 | K | 142   | 0.26606  |
| 60 | F | 122   | 0.22858  |
| 60 | Q | 80    | 0.14989  |
| 60 | P | 66    | 0.12366  |
| 60 | W | 27    | 0.05059  |
| 60 | C | 21    | 0.03935  |
| 60 | M | 13    | 0.02436  |
| 61 | G | 16714 | 31.27503 |
| 61 | S | 8768  | 16.40657 |
| 61 | T | 5495  | 10.28218 |
| 61 | R | 4393  | 8.22013  |
| 61 | A | 3979  | 7.44545  |
| 61 | I | 3499  | 6.54728  |
| 61 | D | 3104  | 5.80817  |
| 61 | N | 1362  | 2.54856  |
| 61 | V | 1211  | 2.26601  |
| 61 | E | 920   | 1.72149  |
| 61 | L | 859   | 1.60735  |
| 61 | K | 823   | 1.53999  |
| 61 | H | 618   | 1.15639  |
| 61 | Y | 436   | 0.81584  |
| 61 | P | 415   | 0.77654  |
| 61 | M | 302   | 0.5651   |
| 61 | F | 218   | 0.40792  |
| 61 | Q | 181   | 0.33868  |
| 61 | W | 119   | 0.22267  |
| 61 | C | 26    | 0.04865  |
| 62 | T | 23933 | 44.72371 |
| 62 | S | 6331  | 11.83077 |
| 62 | N | 5161  | 9.64439  |
| 62 | A | 4306  | 8.04664  |
| 62 | R | 3391  | 6.33678  |
| 62 | I | 2712  | 5.06793  |
| 62 | P | 1928  | 3.60286  |
| 62 | V | 950   | 1.77527  |
| 62 | E | 915   | 1.70986  |
| 62 | D | 719   | 1.3436   |
| 62 | K | 685   | 1.28006  |
| 62 | G | 562   | 1.05021  |
| 62 | L | 461   | 0.86147  |
| 62 | Q | 338   | 0.63162  |
| 62 | Y | 306   | 0.57182  |

|    |    |       |          |
|----|----|-------|----------|
| 62 | M  | 282   | 0.52697  |
| 62 | F  | 264   | 0.49334  |
| 62 | H  | 201   | 0.37561  |
| 62 | W  | 53    | 0.09904  |
| 62 | C  | 15    | 0.02803  |
| 63 | T  | 18816 | 79.16526 |
| 63 | P  | 1153  | 4.85106  |
| 63 | A  | 1088  | 4.57758  |
| 63 | S  | 617   | 2.59593  |
| 63 | R  | 578   | 2.43184  |
| 63 | K  | 489   | 2.05739  |
| 63 | I  | 357   | 1.50202  |
| 63 | V  | 163   | 0.6858   |
| 63 | E  | 159   | 0.66897  |
| 63 | G  | 100   | 0.42073  |
| 63 | L  | 80    | 0.33659  |
| 63 | Q  | 54    | 0.2272   |
| 63 | M  | 50    | 0.21037  |
| 63 | N  | 18    | 0.07573  |
| 63 | D  | 12    | 0.05049  |
| 63 | F  | 12    | 0.05049  |
| 63 | Y  | 12    | 0.05049  |
| 63 | H  | 6     | 0.02524  |
| 63 | W  | 4     | 0.01683  |
| 63 | NA | 0     | 0        |
| 64 | NA | 0     | 0        |
| 65 | NA | 0     | 0        |
| 66 | Y  | 16127 | 30.06749 |
| 66 | T  | 8566  | 15.97062 |
| 66 | S  | 7186  | 13.39772 |
| 66 | A  | 3471  | 6.4714   |
| 66 | N  | 2778  | 5.17936  |
| 66 | R  | 2752  | 5.13088  |
| 66 | D  | 2164  | 4.0346   |
| 66 | W  | 1487  | 2.77239  |
| 66 | F  | 1315  | 2.45171  |
| 66 | I  | 1261  | 2.35103  |
| 66 | H  | 1078  | 2.00984  |
| 66 | K  | 1066  | 1.98747  |
| 66 | V  | 1036  | 1.93154  |
| 66 | G  | 1000  | 1.86442  |
| 66 | L  | 765   | 1.42628  |
| 66 | M  | 627   | 1.16899  |
| 66 | E  | 548   | 1.0217   |
| 66 | Q  | 259   | 0.48288  |
| 66 | C  | 124   | 0.23119  |

|    |   |       |          |
|----|---|-------|----------|
| 66 | P | 26    | 0.04847  |
| 67 | Y | 50566 | 93.7762  |
| 67 | V | 1401  | 2.5982   |
| 67 | I | 316   | 0.58603  |
| 67 | F | 285   | 0.52854  |
| 67 | H | 266   | 0.49331  |
| 67 | A | 256   | 0.47476  |
| 67 | L | 228   | 0.42283  |
| 67 | C | 190   | 0.35236  |
| 67 | T | 127   | 0.23553  |
| 67 | S | 95    | 0.17618  |
| 67 | D | 86    | 0.15949  |
| 67 | N | 52    | 0.09644  |
| 67 | M | 11    | 0.0204   |
| 67 | Q | 11    | 0.0204   |
| 67 | W | 11    | 0.0204   |
| 67 | P | 6     | 0.01113  |
| 67 | E | 5     | 0.00927  |
| 67 | R | 5     | 0.00927  |
| 67 | G | 3     | 0.00556  |
| 67 | K | 2     | 0.00371  |
| 68 | A | 39341 | 72.30074 |
| 68 | T | 3909  | 7.18395  |
| 68 | S | 2353  | 4.32433  |
| 68 | G | 2115  | 3.88694  |
| 68 | V | 1802  | 3.31171  |
| 68 | D | 1142  | 2.09876  |
| 68 | L | 1132  | 2.08039  |
| 68 | R | 680   | 1.2497   |
| 68 | P | 396   | 0.72777  |
| 68 | H | 374   | 0.68734  |
| 68 | I | 349   | 0.64139  |
| 68 | E | 330   | 0.60647  |
| 68 | N | 144   | 0.26464  |
| 68 | K | 125   | 0.22972  |
| 68 | Y | 65    | 0.11946  |
| 68 | M | 52    | 0.09557  |
| 68 | Q | 52    | 0.09557  |
| 68 | F | 47    | 0.08638  |
| 68 | W | 4     | 0.00735  |
| 68 | C | 1     | 0.00184  |
| 69 | D | 43429 | 79.32962 |
| 69 | E | 2913  | 5.32103  |
| 69 | N | 2147  | 3.92182  |
| 69 | G | 1687  | 3.08156  |
| 69 | Y | 1413  | 2.58106  |

|    |   |       |          |
|----|---|-------|----------|
| 69 | A | 1228  | 2.24313  |
| 69 | S | 489   | 0.89323  |
| 69 | P | 368   | 0.67221  |
| 69 | H | 267   | 0.48772  |
| 69 | T | 199   | 0.3635   |
| 69 | V | 170   | 0.31053  |
| 69 | Q | 132   | 0.24112  |
| 69 | R | 111   | 0.20276  |
| 69 | K | 82    | 0.14979  |
| 69 | W | 33    | 0.06028  |
| 69 | I | 29    | 0.05297  |
| 69 | F | 18    | 0.03288  |
| 69 | L | 18    | 0.03288  |
| 69 | C | 6     | 0.01096  |
| 69 | M | 6     | 0.01096  |
| 70 | S | 51170 | 91.38316 |
| 70 | A | 1746  | 3.11814  |
| 70 | F | 1184  | 2.11447  |
| 70 | P | 922   | 1.64658  |
| 70 | T | 267   | 0.47683  |
| 70 | D | 149   | 0.2661   |
| 70 | L | 89    | 0.15894  |
| 70 | Y | 89    | 0.15894  |
| 70 | V | 87    | 0.15537  |
| 70 | G | 82    | 0.14644  |
| 70 | R | 72    | 0.12858  |
| 70 | N | 52    | 0.09287  |
| 70 | H | 32    | 0.05715  |
| 70 | K | 15    | 0.02679  |
| 70 | Q | 13    | 0.02322  |
| 70 | C | 11    | 0.01964  |
| 70 | I | 7     | 0.0125   |
| 70 | W | 4     | 0.00714  |
| 70 | M | 3     | 0.00536  |
| 70 | E | 1     | 0.00179  |
| 71 | V | 52005 | 91.47435 |
| 71 | A | 1757  | 3.09048  |
| 71 | L | 1421  | 2.49947  |
| 71 | M | 1278  | 2.24794  |
| 71 | E | 96    | 0.16886  |
| 71 | T | 95    | 0.1671   |
| 71 | I | 58    | 0.10202  |
| 71 | G | 52    | 0.09147  |
| 71 | F | 45    | 0.07915  |
| 71 | Q | 10    | 0.01759  |
| 71 | S | 9     | 0.01583  |

|    |    |       |          |
|----|----|-------|----------|
| 71 | P  | 6     | 0.01055  |
| 71 | R  | 6     | 0.01055  |
| 71 | D  | 5     | 0.00879  |
| 71 | K  | 4     | 0.00704  |
| 71 | N  | 2     | 0.00352  |
| 71 | W  | 2     | 0.00352  |
| 71 | C  | 1     | 0.00176  |
| 72 | K  | 49716 | 87.10339 |
| 72 | E  | 1726  | 3.02399  |
| 72 | Q  | 1564  | 2.74016  |
| 72 | R  | 1390  | 2.43531  |
| 72 | A  | 674   | 1.18086  |
| 72 | T  | 496   | 0.869    |
| 72 | N  | 381   | 0.66752  |
| 72 | S  | 298   | 0.5221   |
| 72 | L  | 266   | 0.46604  |
| 72 | M  | 254   | 0.44501  |
| 72 | G  | 131   | 0.22951  |
| 72 | D  | 80    | 0.14016  |
| 72 | V  | 37    | 0.06482  |
| 72 | W  | 29    | 0.05081  |
| 72 | I  | 18    | 0.03154  |
| 72 | F  | 7     | 0.01226  |
| 72 | P  | 6     | 0.01051  |
| 72 | Y  | 3     | 0.00526  |
| 72 | H  | 1     | 0.00175  |
| 73 | NA | 0     | 0        |
| 74 | G  | 54303 | 94.18447 |
| 74 | D  | 2414  | 4.1869   |
| 74 | A  | 489   | 0.84813  |
| 74 | E  | 124   | 0.21507  |
| 74 | S  | 109   | 0.18905  |
| 74 | V  | 73    | 0.12661  |
| 74 | C  | 29    | 0.0503   |
| 74 | P  | 22    | 0.03816  |
| 74 | R  | 21    | 0.03642  |
| 74 | N  | 20    | 0.03469  |
| 74 | T  | 18    | 0.03122  |
| 74 | H  | 15    | 0.02602  |
| 74 | K  | 10    | 0.01734  |
| 74 | L  | 5     | 0.00867  |
| 74 | W  | 2     | 0.00347  |
| 74 | F  | 1     | 0.00173  |
| 74 | Y  | 1     | 0.00173  |
| 75 | R  | 57633 | 99.51995 |
| 75 | Q  | 139   | 0.24002  |



|    |   |       |          |
|----|---|-------|----------|
| 75 | L | 43    | 0.07425  |
| 75 | G | 20    | 0.03454  |
| 75 | P | 15    | 0.0259   |
| 75 | C | 11    | 0.01899  |
| 75 | H | 10    | 0.01727  |
| 75 | W | 9     | 0.01554  |
| 75 | S | 7     | 0.01209  |
| 75 | K | 6     | 0.01036  |
| 75 | T | 6     | 0.01036  |
| 75 | D | 4     | 0.00691  |
| 75 | I | 3     | 0.00518  |
| 75 | F | 2     | 0.00345  |
| 75 | V | 2     | 0.00345  |
| 75 | N | 1     | 0.00173  |
| 76 | F | 56527 | 97.38814 |
| 76 | V | 397   | 0.68398  |
| 76 | L | 336   | 0.57888  |
| 76 | S | 272   | 0.46862  |
| 76 | A | 207   | 0.35663  |
| 76 | Y | 132   | 0.22742  |
| 76 | I | 65    | 0.11199  |
| 76 | G | 38    | 0.06547  |
| 76 | W | 29    | 0.04996  |
| 76 | C | 24    | 0.04135  |
| 76 | T | 9     | 0.01551  |
| 76 | D | 2     | 0.00345  |
| 76 | P | 2     | 0.00345  |
| 76 | H | 1     | 0.00172  |
| 76 | M | 1     | 0.00172  |
| 76 | Q | 1     | 0.00172  |
| 77 | T | 51332 | 88.2448  |
| 77 | I | 2264  | 3.89204  |
| 77 | A | 2247  | 3.86282  |
| 77 | S | 1353  | 2.32594  |
| 77 | V | 245   | 0.42118  |
| 77 | N | 204   | 0.3507   |
| 77 | D | 106   | 0.18222  |
| 77 | F | 102   | 0.17535  |
| 77 | L | 67    | 0.11518  |
| 77 | H | 59    | 0.10143  |
| 77 | R | 56    | 0.09627  |
| 77 | K | 40    | 0.06876  |
| 77 | Y | 28    | 0.04813  |
| 77 | P | 27    | 0.04642  |
| 77 | G | 17    | 0.02922  |
| 77 | M | 14    | 0.02407  |

|    |   |       |          |
|----|---|-------|----------|
| 77 | E | 5     | 0.0086   |
| 77 | C | 4     | 0.00688  |
| 78 | I | 51209 | 87.86116 |
| 78 | V | 4167  | 7.14947  |
| 78 | L | 1603  | 2.75033  |
| 78 | A | 350   | 0.60051  |
| 78 | T | 329   | 0.56448  |
| 78 | F | 212   | 0.36374  |
| 78 | M | 203   | 0.34829  |
| 78 | S | 86    | 0.14755  |
| 78 | N | 67    | 0.11495  |
| 78 | C | 19    | 0.0326   |
| 78 | G | 13    | 0.0223   |
| 78 | Y | 9     | 0.01544  |
| 78 | D | 7     | 0.01201  |
| 78 | R | 4     | 0.00686  |
| 78 | H | 2     | 0.00343  |
| 78 | P | 2     | 0.00343  |
| 78 | Q | 1     | 0.00172  |
| 78 | W | 1     | 0.00172  |
| 79 | S | 54197 | 92.82533 |
| 79 | T | 2038  | 3.49056  |
| 79 | A | 739   | 1.26571  |
| 79 | W | 340   | 0.58233  |
| 79 | F | 302   | 0.51725  |
| 79 | P | 254   | 0.43504  |
| 79 | Y | 112   | 0.19183  |
| 79 | V | 104   | 0.17812  |
| 79 | I | 74    | 0.12674  |
| 79 | L | 52    | 0.08906  |
| 79 | D | 45    | 0.07707  |
| 79 | R | 31    | 0.05309  |
| 79 | G | 28    | 0.04796  |
| 79 | H | 27    | 0.04624  |
| 79 | N | 26    | 0.04453  |
| 79 | E | 10    | 0.01713  |
| 79 | C | 5     | 0.00856  |
| 79 | Q | 2     | 0.00343  |
| 80 | Q | 19081 | 32.66008 |
| 80 | R | 15895 | 27.20675 |
| 80 | K | 14953 | 25.59437 |
| 80 | H | 1989  | 3.40448  |
| 80 | L | 1649  | 2.82252  |
| 80 | V | 1459  | 2.4973   |
| 80 | E | 1283  | 2.19605  |
| 80 | T | 341   | 0.58367  |

|    |   |       |          |
|----|---|-------|----------|
| 80 | A | 316   | 0.54088  |
| 80 | I | 304   | 0.52034  |
| 80 | P | 290   | 0.49638  |
| 80 | S | 243   | 0.41593  |
| 80 | G | 205   | 0.35089  |
| 80 | Y | 109   | 0.18657  |
| 80 | F | 89    | 0.15234  |
| 80 | N | 86    | 0.1472   |
| 80 | M | 81    | 0.13864  |
| 80 | W | 23    | 0.03937  |
| 80 | D | 19    | 0.03252  |
| 80 | C | 8     | 0.01369  |
| 81 | D | 54539 | 93.27211 |
| 81 | G | 1173  | 2.00605  |
| 81 | E | 986   | 1.68625  |
| 81 | N | 789   | 1.34934  |
| 81 | V | 404   | 0.69092  |
| 81 | A | 181   | 0.30954  |
| 81 | Q | 150   | 0.25653  |
| 81 | H | 92    | 0.15734  |
| 81 | S | 45    | 0.07696  |
| 81 | I | 35    | 0.05986  |
| 81 | T | 26    | 0.04446  |
| 81 | Y | 22    | 0.03762  |
| 81 | P | 11    | 0.01881  |
| 81 | F | 9     | 0.01539  |
| 81 | L | 4     | 0.00684  |
| 81 | K | 3     | 0.00513  |
| 81 | R | 3     | 0.00513  |
| 81 | M | 1     | 0.00171  |
| 82 | N | 38917 | 66.51001 |
| 82 | S | 6249  | 10.67968 |
| 82 | K | 4706  | 8.04266  |
| 82 | D | 2392  | 4.08798  |
| 82 | T | 1306  | 2.23198  |
| 82 | G | 1185  | 2.02519  |
| 82 | Y | 722   | 1.23391  |
| 82 | R | 629   | 1.07497  |
| 82 | I | 606   | 1.03567  |
| 82 | H | 373   | 0.63747  |
| 82 | A | 314   | 0.53663  |
| 82 | V | 294   | 0.50245  |
| 82 | P | 225   | 0.38453  |
| 82 | E | 177   | 0.3025   |
| 82 | Q | 134   | 0.22901  |
| 82 | L | 115   | 0.19654  |

|    |   |       |          |
|----|---|-------|----------|
| 82 | F | 104   | 0.17774  |
| 82 | M | 52    | 0.08887  |
| 82 | W | 7     | 0.01196  |
| 82 | C | 6     | 0.01025  |
| 83 | A | 46334 | 79.13984 |
| 83 | G | 2844  | 4.85764  |
| 83 | T | 2162  | 3.69276  |
| 83 | V | 1867  | 3.18889  |
| 83 | D | 1648  | 2.81483  |
| 83 | S | 1313  | 2.24264  |
| 83 | R | 941   | 1.60726  |
| 83 | N | 425   | 0.72591  |
| 83 | P | 392   | 0.66955  |
| 83 | E | 186   | 0.31769  |
| 83 | I | 109   | 0.18618  |
| 83 | F | 87    | 0.1486   |
| 83 | K | 50    | 0.0854   |
| 83 | Y | 46    | 0.07857  |
| 83 | L | 44    | 0.07515  |
| 83 | H | 43    | 0.07345  |
| 83 | W | 24    | 0.04099  |
| 83 | M | 15    | 0.02562  |
| 83 | Q | 15    | 0.02562  |
| 83 | C | 2     | 0.00342  |
| 84 | K | 44364 | 75.75432 |
| 84 | N | 3532  | 6.03111  |
| 84 | R | 3339  | 5.70155  |
| 84 | E | 2823  | 4.82045  |
| 84 | Q | 914   | 1.56071  |
| 84 | T | 679   | 1.15944  |
| 84 | G | 554   | 0.94599  |
| 84 | S | 455   | 0.77694  |
| 84 | A | 449   | 0.7667   |
| 84 | D | 413   | 0.70522  |
| 84 | M | 390   | 0.66595  |
| 84 | L | 271   | 0.46275  |
| 84 | V | 178   | 0.30395  |
| 84 | P | 83    | 0.14173  |
| 84 | H | 54    | 0.09221  |
| 84 | I | 40    | 0.0683   |
| 84 | W | 14    | 0.02391  |
| 84 | Y | 8     | 0.01366  |
| 84 | F | 3     | 0.00512  |
| 85 | N | 43727 | 74.65895 |
| 85 | D | 4385  | 7.4869   |
| 85 | K | 3048  | 5.20412  |

|    |   |       |          |
|----|---|-------|----------|
| 85 | S | 2254  | 3.84845  |
| 85 | R | 1282  | 2.18887  |
| 85 | T | 1249  | 2.13253  |
| 85 | H | 623   | 1.0637   |
| 85 | A | 387   | 0.66076  |
| 85 | Y | 325   | 0.5549   |
| 85 | G | 297   | 0.50709  |
| 85 | I | 287   | 0.49002  |
| 85 | M | 170   | 0.29026  |
| 85 | E | 159   | 0.27147  |
| 85 | L | 135   | 0.2305   |
| 85 | P | 102   | 0.17415  |
| 85 | Q | 71    | 0.12122  |
| 85 | F | 32    | 0.05464  |
| 85 | V | 22    | 0.03756  |
| 85 | W | 8     | 0.01366  |
| 85 | C | 6     | 0.01024  |
| 86 | T | 47332 | 80.79753 |
| 86 | I | 3244  | 5.53763  |
| 86 | M | 1740  | 2.97025  |
| 86 | S | 1709  | 2.91733  |
| 86 | L | 1437  | 2.45301  |
| 86 | A | 1338  | 2.28402  |
| 86 | V | 872   | 1.48854  |
| 86 | W | 186   | 0.31751  |
| 86 | R | 176   | 0.30044  |
| 86 | K | 164   | 0.27995  |
| 86 | N | 116   | 0.19802  |
| 86 | E | 112   | 0.19119  |
| 86 | P | 47    | 0.08023  |
| 86 | F | 31    | 0.05292  |
| 86 | G | 27    | 0.04609  |
| 86 | Q | 23    | 0.03926  |
| 86 | H | 13    | 0.02219  |
| 86 | D | 7     | 0.01195  |
| 86 | C | 4     | 0.00683  |
| 86 | Y | 3     | 0.00512  |
| 87 | L | 27239 | 46.49484 |
| 87 | V | 25387 | 43.33362 |
| 87 | M | 1794  | 3.06222  |
| 87 | I | 1618  | 2.7618   |
| 87 | A | 1023  | 1.74618  |
| 87 | T | 460   | 0.78518  |
| 87 | W | 237   | 0.40454  |
| 87 | F | 235   | 0.40113  |
| 87 | P | 119   | 0.20312  |

|    |   |       |          |
|----|---|-------|----------|
| 87 | G | 110   | 0.18776  |
| 87 | S | 107   | 0.18264  |
| 87 | Q | 82    | 0.13997  |
| 87 | E | 51    | 0.08705  |
| 87 | H | 41    | 0.06998  |
| 87 | Y | 38    | 0.06486  |
| 87 | R | 22    | 0.03755  |
| 87 | C | 9     | 0.01536  |
| 87 | K | 8     | 0.01366  |
| 87 | D | 4     | 0.00683  |
| 87 | N | 1     | 0.00171  |
| 88 | Y | 47733 | 81.46675 |
| 88 | N | 2615  | 4.46307  |
| 88 | F | 2152  | 3.67286  |
| 88 | S | 1553  | 2.65053  |
| 88 | D | 1107  | 1.88934  |
| 88 | H | 1063  | 1.81424  |
| 88 | T | 713   | 1.21689  |
| 88 | V | 360   | 0.61442  |
| 88 | A | 245   | 0.41815  |
| 88 | W | 238   | 0.4062   |
| 88 | L | 236   | 0.40279  |
| 88 | I | 222   | 0.37889  |
| 88 | C | 133   | 0.22699  |
| 88 | E | 90    | 0.1536   |
| 88 | R | 64    | 0.10923  |
| 88 | Q | 30    | 0.0512   |
| 88 | K | 19    | 0.03243  |
| 88 | P | 9     | 0.01536  |
| 88 | G | 7     | 0.01195  |
| 88 | M | 3     | 0.00512  |
| 89 | L | 58168 | 99.25602 |
| 89 | P | 227   | 0.38735  |
| 89 | Q | 99    | 0.16893  |
| 89 | M | 30    | 0.05119  |
| 89 | V | 20    | 0.03413  |
| 89 | S | 17    | 0.02901  |
| 89 | I | 15    | 0.0256   |
| 89 | R | 15    | 0.0256   |
| 89 | F | 7     | 0.01194  |
| 89 | H | 3     | 0.00512  |
| 89 | A | 2     | 0.00341  |
| 89 | W | 1     | 0.00171  |
| 90 | Q | 49624 | 84.6667  |
| 90 | E | 2865  | 4.88816  |
| 90 | M | 2116  | 3.61024  |

|    |   |       |          |
|----|---|-------|----------|
| 90 | R | 1510  | 2.57631  |
| 90 | H | 857   | 1.46218  |
| 90 | L | 853   | 1.45536  |
| 90 | D | 280   | 0.47773  |
| 90 | K | 150   | 0.25592  |
| 90 | V | 91    | 0.15526  |
| 90 | T | 58    | 0.09896  |
| 90 | S | 44    | 0.07507  |
| 90 | I | 39    | 0.06654  |
| 90 | A | 29    | 0.04948  |
| 90 | G | 23    | 0.03924  |
| 90 | P | 17    | 0.029    |
| 90 | W | 16    | 0.0273   |
| 90 | F | 15    | 0.02559  |
| 90 | N | 14    | 0.02389  |
| 90 | Y | 9     | 0.01536  |
| 90 | C | 1     | 0.00171  |
| 91 | M | 55173 | 94.12939 |
| 91 | L | 1337  | 2.28103  |
| 91 | I | 1152  | 1.9654   |
| 91 | V | 650   | 1.10895  |
| 91 | T | 189   | 0.32245  |
| 91 | K | 67    | 0.11431  |
| 91 | A | 19    | 0.03242  |
| 91 | R | 14    | 0.02389  |
| 91 | S | 5     | 0.00853  |
| 91 | F | 4     | 0.00682  |
| 91 | P | 2     | 0.00341  |
| 91 | C | 1     | 0.00171  |
| 91 | N | 1     | 0.00171  |
| 92 | N | 46267 | 78.93507 |
| 92 | D | 6991  | 11.92718 |
| 92 | S | 1863  | 3.17842  |
| 92 | T | 1475  | 2.51646  |
| 92 | H | 521   | 0.88887  |
| 92 | A | 248   | 0.42311  |
| 92 | G | 213   | 0.36339  |
| 92 | K | 204   | 0.34804  |
| 92 | R | 199   | 0.33951  |
| 92 | I | 148   | 0.2525   |
| 92 | Y | 145   | 0.24738  |
| 92 | E | 140   | 0.23885  |
| 92 | V | 102   | 0.17402  |
| 92 | F | 44    | 0.07507  |
| 92 | L | 25    | 0.04265  |
| 92 | M | 13    | 0.02218  |

|    |   |       |          |
|----|---|-------|----------|
| 92 | Q | 12    | 0.02047  |
| 92 | P | 2     | 0.00341  |
| 92 | C | 1     | 0.00171  |
| 92 | W | 1     | 0.00171  |
| 93 | S | 37372 | 63.75734 |
| 93 | N | 12310 | 21.00109 |
| 93 | D | 2673  | 4.56019  |
| 93 | G | 2556  | 4.36058  |
| 93 | R | 985   | 1.68043  |
| 93 | T | 838   | 1.42964  |
| 93 | A | 383   | 0.65341  |
| 93 | H | 317   | 0.54081  |
| 93 | Y | 310   | 0.52887  |
| 93 | K | 293   | 0.49986  |
| 93 | Q | 145   | 0.24737  |
| 93 | M | 139   | 0.23714  |
| 93 | I | 95    | 0.16207  |
| 93 | C | 58    | 0.09895  |
| 93 | E | 38    | 0.06483  |
| 93 | V | 38    | 0.06483  |
| 93 | L | 36    | 0.06142  |
| 93 | F | 21    | 0.03583  |
| 93 | W | 6     | 0.01024  |
| 93 | P | 3     | 0.00512  |
| 94 | L | 57709 | 98.4476  |
| 94 | V | 327   | 0.55784  |
| 94 | P | 266   | 0.45378  |
| 94 | Q | 95    | 0.16206  |
| 94 | M | 93    | 0.15865  |
| 94 | A | 52    | 0.08871  |
| 94 | T | 27    | 0.04606  |
| 94 | R | 19    | 0.03241  |
| 94 | I | 17    | 0.029    |
| 94 | S | 7     | 0.01194  |
| 94 | F | 3     | 0.00512  |
| 94 | H | 3     | 0.00512  |
| 94 | K | 1     | 0.00171  |
| 95 | K | 41925 | 71.52118 |
| 95 | Q | 7172  | 12.23494 |
| 95 | E | 2636  | 4.49684  |
| 95 | T | 2154  | 3.67458  |
| 95 | R | 2140  | 3.65069  |
| 95 | N | 1244  | 2.12218  |
| 95 | I | 307   | 0.52372  |
| 95 | S | 304   | 0.5186   |
| 95 | A | 139   | 0.23712  |



|    |   |       |          |
|----|---|-------|----------|
| 95 | M | 139   | 0.23712  |
| 95 | G | 115   | 0.19618  |
| 95 | D | 110   | 0.18765  |
| 95 | L | 103   | 0.17571  |
| 95 | V | 79    | 0.13477  |
| 95 | H | 46    | 0.07847  |
| 95 | F | 2     | 0.00341  |
| 95 | P | 2     | 0.00341  |
| 95 | W | 1     | 0.00171  |
| 95 | Y | 1     | 0.00171  |
| 96 | P | 48892 | 83.40498 |
| 96 | T | 2192  | 3.73934  |
| 96 | I | 1993  | 3.39986  |
| 96 | S | 1522  | 2.59638  |
| 96 | L | 1242  | 2.11873  |
| 96 | A | 1083  | 1.84749  |
| 96 | V | 962   | 1.64108  |
| 96 | H | 223   | 0.38042  |
| 96 | F | 179   | 0.30536  |
| 96 | R | 157   | 0.26783  |
| 96 | D | 47    | 0.08018  |
| 96 | E | 38    | 0.06482  |
| 96 | N | 31    | 0.05288  |
| 96 | G | 18    | 0.03071  |
| 96 | Y | 17    | 0.029    |
| 96 | Q | 16    | 0.02729  |
| 96 | M | 8     | 0.01365  |
| 97 | E | 52238 | 89.11293 |
| 97 | D | 4343  | 7.40873  |
| 97 | G | 1278  | 2.18014  |
| 97 | A | 209   | 0.35653  |
| 97 | V | 122   | 0.20812  |
| 97 | Q | 101   | 0.1723   |
| 97 | K | 88    | 0.15012  |
| 97 | R | 63    | 0.10747  |
| 97 | N | 52    | 0.08871  |
| 97 | S | 40    | 0.06824  |
| 97 | T | 38    | 0.06482  |
| 97 | H | 17    | 0.029    |
| 97 | P | 14    | 0.02388  |
| 97 | M | 8     | 0.01365  |
| 97 | L | 5     | 0.00853  |
| 97 | W | 3     | 0.00512  |
| 97 | Y | 1     | 0.00171  |
| 98 | D | 58177 | 99.24259 |
| 98 | G | 221   | 0.377    |

|     |   |       |          |
|-----|---|-------|----------|
| 98  | V | 72    | 0.12282  |
| 98  | N | 61    | 0.10406  |
| 98  | E | 39    | 0.06653  |
| 98  | Y | 23    | 0.03924  |
| 98  | A | 15    | 0.02559  |
| 98  | H | 11    | 0.01876  |
| 98  | I | 1     | 0.00171  |
| 98  | K | 1     | 0.00171  |
| 99  | T | 52068 | 88.82293 |
| 99  | S | 5464  | 9.32105  |
| 99  | A | 832   | 1.41931  |
| 99  | G | 57    | 0.09724  |
| 99  | I | 57    | 0.09724  |
| 99  | E | 34    | 0.058    |
| 99  | N | 29    | 0.04947  |
| 99  | M | 22    | 0.03753  |
| 99  | P | 21    | 0.03582  |
| 99  | R | 14    | 0.02388  |
| 99  | D | 7     | 0.01194  |
| 99  | F | 6     | 0.01024  |
| 99  | C | 5     | 0.00853  |
| 99  | K | 3     | 0.00512  |
| 99  | V | 1     | 0.00171  |
| 100 | A | 50268 | 85.75669 |
| 100 | G | 7507  | 12.80686 |
| 100 | D | 271   | 0.46232  |
| 100 | S | 267   | 0.4555   |
| 100 | T | 128   | 0.21837  |
| 100 | V | 91    | 0.15525  |
| 100 | N | 41    | 0.06995  |
| 100 | Y | 28    | 0.04777  |
| 100 | P | 7     | 0.01194  |
| 100 | R | 4     | 0.00682  |
| 100 | E | 2     | 0.00341  |
| 100 | L | 2     | 0.00341  |
| 100 | C | 1     | 0.00171  |
| 101 | M | 35575 | 60.69162 |
| 101 | T | 8985  | 15.32858 |
| 101 | V | 7391  | 12.60919 |
| 101 | I | 3360  | 5.73222  |
| 101 | L | 1356  | 2.31336  |
| 101 | R | 624   | 1.06456  |
| 101 | K | 575   | 0.98096  |
| 101 | E | 192   | 0.32756  |
| 101 | A | 161   | 0.27467  |
| 101 | N | 118   | 0.20131  |

|     |   |       |          |
|-----|---|-------|----------|
| 101 | S | 96    | 0.16378  |
| 101 | Q | 63    | 0.10748  |
| 101 | D | 34    | 0.058    |
| 101 | W | 25    | 0.04265  |
| 101 | F | 24    | 0.04094  |
| 101 | P | 14    | 0.02388  |
| 101 | G | 12    | 0.02047  |
| 101 | H | 10    | 0.01706  |
| 101 | C | 1     | 0.00171  |
| 102 | Y | 58024 | 98.99848 |
| 102 | H | 170   | 0.29005  |
| 102 | C | 168   | 0.28664  |
| 102 | F | 164   | 0.27981  |
| 102 | N | 58    | 0.09896  |
| 102 | S | 18    | 0.03071  |
| 102 | D | 6     | 0.01024  |
| 102 | L | 1     | 0.00171  |
| 102 | Q | 1     | 0.00171  |
| 102 | R | 1     | 0.00171  |
| 103 | Y | 51952 | 89.02293 |
| 103 | F | 1918  | 3.28661  |
| 103 | T | 817   | 1.39998  |
| 103 | I | 789   | 1.352    |
| 103 | S | 736   | 1.26118  |
| 103 | R | 677   | 1.16008  |
| 103 | H | 584   | 1.00072  |
| 103 | V | 266   | 0.45581  |
| 103 | L | 188   | 0.32215  |
| 103 | Q | 152   | 0.26046  |
| 103 | C | 130   | 0.22276  |
| 103 | N | 63    | 0.10795  |
| 103 | A | 35    | 0.05997  |
| 103 | D | 22    | 0.0377   |
| 103 | W | 13    | 0.02228  |
| 103 | P | 6     | 0.01028  |
| 103 | G | 5     | 0.00857  |
| 103 | K | 5     | 0.00857  |
| 104 | C | 58234 | 99.79778 |
| 104 | R | 74    | 0.12682  |
| 104 | S | 16    | 0.02742  |
| 104 | Y | 15    | 0.02571  |
| 104 | W | 7     | 0.012    |
| 104 | F | 4     | 0.00685  |
| 104 | G | 2     | 0.00343  |
| 105 | A | 4930  | 94.75303 |
| 105 | V | 169   | 3.24813  |

|     |   |      |          |
|-----|---|------|----------|
| 105 | T | 35   | 0.67269  |
| 105 | G | 31   | 0.59581  |
| 105 | S | 30   | 0.57659  |
| 105 | E | 7    | 0.13454  |
| 105 | Q | 1    | 0.01922  |
| 106 | A | 3924 | 84.45975 |
| 106 | E | 303  | 6.52174  |
| 106 | P | 131  | 2.81963  |
| 106 | T | 110  | 2.36763  |
| 106 | V | 66   | 1.42058  |
| 106 | S | 55   | 1.18381  |
| 106 | G | 41   | 0.88248  |
| 106 | R | 11   | 0.23676  |
| 106 | K | 2    | 0.04305  |
| 106 | D | 1    | 0.02152  |
| 106 | I | 1    | 0.02152  |
| 106 | L | 1    | 0.02152  |
